# Supplementary material for: Thiazepine moiety-controlled regioselective rearrangements of 7-oxanorbornadiene derivatives
Source: Royal Society of Chemistry journal article supplement (doi:10.1039/b813371a), 2008-01-01

# Thiazepine Moiety-Controlled Regioselective Rearrangements of 7-Oxanorbornadiene Derivatives

Hanfeng Ding, Yiping Zhang, Weijun Yao, Duanjun Xu and Cheng Ma\*

*Department of Chemistry, Zhejiang University, Hangzhou, 310027, China*  
*[mcorg@zju.edu.cn](mailto:mcorg@zju.edu.cn)*

## Contents

|                                                                                                                                                  |          |
|--------------------------------------------------------------------------------------------------------------------------------------------------|----------|
| Experiment section                                                                                                                               | S2–S27   |
| General                                                                                                                                          | S2       |
| Preparation and characterization data for the starting materials thiazepine-fused 7-oxanorbornadienes <b>2a–k</b> , <b>7a–i</b> and <b>12a–c</b> | S2–S12   |
| General procedure for the Brønsted acid catalyzed rearrangements of <b>2a–k</b>                                                                  | S12–S13  |
| Characterization data for the compounds <b>3a–b</b> , <b>4a–i</b> , <b>5</b> and <b>6a–e</b>                                                     | S13–S19  |
| General procedure for the skeletal rearrangements of thiazepine-fused 7-oxanorbornadienes <b>7a–h</b>                                            | S19–S24  |
| Preparation and characterization data for the intermediate <b>8a</b>                                                                             | S19      |
| Rearrangements of <b>7a–h</b>                                                                                                                    | S20      |
| Characterization data for the compounds <b>9a–h</b> and <b>10</b>                                                                                | S22–S23  |
| Characterization data for the compound [D <sub>1</sub> ] <b>11</b>                                                                               | S23–S24  |
| General procedure for the skeletal rearrangements of thiazepine-fused 7-oxanorbornadienes <b>12a–c</b>                                           | S24      |
| Characterization data for the compounds <b>13a–c</b>                                                                                             | S24–S25  |
| References                                                                                                                                       | S26      |
| Spectra                                                                                                                                          | S27–S106 |

## General

Benzynes precursors were prepared according to literatures.<sup>1-6</sup> Unless otherwise specified, all reactions were carried out under a nitrogen atmosphere with dry, freshly distilled solvents in anhydrous conditions. Dichloromethane was distilled from calcium hydride immediately prior to use. All chemicals were distilled or recrystallized before use, when necessary.

All reactions were monitored by thin-layer chromatography (TLC) carried out on silica gel plates using UV-light (254 and 365 nm). Flash chromatography was performed on neutral Al<sub>2</sub>O<sub>3</sub> (200-300 mesh). NMR spectra were recorded in CDCl<sub>3</sub>, d<sub>4</sub>-Methanol, d<sub>6</sub>-Acetone or d<sub>6</sub>-DMSO. High resolution mass spectral (HRMS) analyses were measured using ESI (electrospray ionosation) techniques. Melting points are uncorrected.

## Preparation and characterization data for the thiazepine-fused 7-oxanorbordienes **2a–m**, **7a–i** and **12a–c**<sup>7</sup>

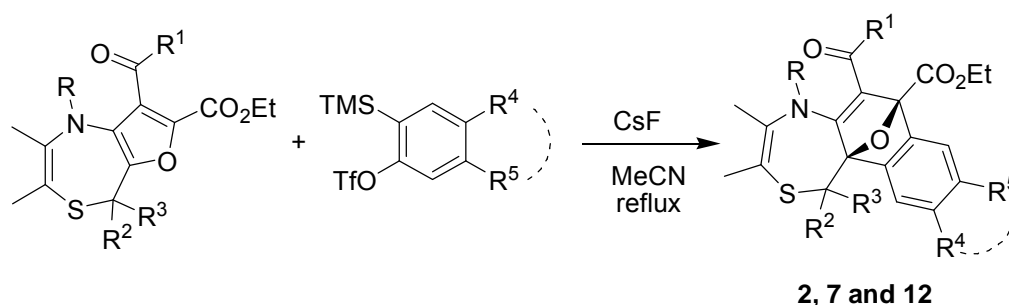

To a solution of furan-fused 1,4-thiazepines (0.15 mmol) and benzyne precursors (0.3 mmol) in anhydrous MeCN was added CsF (0.6 mmol). The mixture was heated to reflux for 1.5 h. On completion of the reaction, the solvent was removed under vacuum, ethyl ether was added to precipitate the salt. The solid was filtered off through a short pad of neutral Al<sub>2</sub>O<sub>3</sub> column and the filtrate was concentrated. The residue was then recrystallized from CH<sub>2</sub>Cl<sub>2</sub>/Hexane to afford the desired products **2a–k**, **7a–i** and **12a–c**.

Compound **2a**: 95 % yield, yellow solid; m.p.213–215 °C; **IR** (KBr)  $\nu_{\max}$  3058, 2979, 2932, 1749, 1613, 1444, 1318, 1180, 1067, 850, 749, 698 cm<sup>-1</sup>; **<sup>1</sup>H NMR** (400 MHz, CDCl<sub>3</sub>, 25 °C, tetramethylsilane)  $\delta$  = 7.73–7.62 (m, 8H), 7.46 (d,  $J$  = 8.0 Hz, 2H), 7.25–7.10 (m, 6H), 6.93 (t,  $J$  = 7.4 Hz, 1H), 6.79 (t,  $J$  = 7.6 Hz, 1H), 4.19–4.13 (m, 2H), 2.85 (q,  $J$  = 6.4 Hz, 2H), 2.42 (q,  $J$  = 6.8 Hz, 2H), 1.61 (s, 3H), 1.24 (s, 3H), 1.19 (t,  $J$  = 7.2 Hz, 3H), 0.52 ppm (t,  $J$  = 7.2 Hz, 3H); **<sup>13</sup>C NMR** (100 MHz, CDCl<sub>3</sub>, 25 °C, tetramethylsilane)  $\delta$  = 189.7, 168.4, 166.6, 148.1, 147.6, 143.1, 142.0, 141.8, 138.7, 131.8, 130.5, 130.4, 130.0, 129.5, 127.2, 127.0, 126.9, 126.8, 126.4, 125.5, 124.9, 124.2, 120.6, 119.4, 96.4, 88.2, 61.7, 58.5, 51.4, 22.9, 16.6, 13.8, 13.1 ppm; **HRMS (ESI)**: calcd for C<sub>39</sub>H<sub>34</sub>BrNO<sub>4</sub>SNa: [M+Na]<sup>+</sup> 714.1284, found 714.1269.

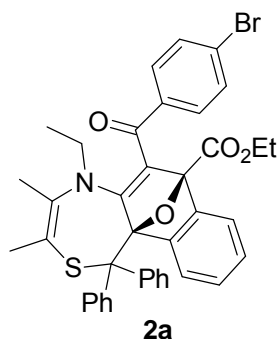

Compound **2b**: 93 % yield, pale yellow solid; m.p.198–200 °C; IR (KBr)  $\nu_{\max}$  3059, 2980, 2935, 1754, 1614, 1466, 1322, 1126, 1070, 772, 699  $\text{cm}^{-1}$ ;  $^1\text{H NMR}$  (400 MHz,  $\text{CDCl}_3$ , 25 °C, tetramethylsilane)  $\delta$  = 7.60 (s, 6H), 7.60 (dd,  $J_1$  = 6.4 Hz,  $J_2$  = 6.8 Hz, 1H), 7.51–7.43 (m, 3H), 7.27–7.16 (m, 6H), 4.23–4.18 (m, 2H), 2.80 (q,  $J$  = 6.8 Hz, 1H), 2.40 (q,  $J$  = 6.8 Hz, 1H), 1.58 (s, 3H), 1.25 (s, 3H), 1.20 (t,  $J$  = 7.2 Hz, 3H), 0.57 ppm (t,  $J$  = 7.2 Hz, 3H);  $^{13}\text{C NMR}$  (100 MHz,  $\text{CDCl}_3$ , 25 °C, tetramethylsilane)  $\delta$  = 190.0, 167.5, 166.0, 147.6 (dd,  $J$  = 247, 13.8 Hz), 146.5 (dd,  $J$  = 244, 12.8 Hz), 144.5 (q,  $J^3$  = 3.0 Hz), 144.2 (d,  $J^3$  = 2.0 Hz), 144.1 (d,  $J^3$  = 1.4 Hz), 142.8, 141.9, 141.5, 138.5, 132.1, 130.4, 130.1, 129.2, 127.7, 127.4, 127.3, 127.0, 126.8, 119.7, 115.2 (d,  $J^2$  = 21.8 Hz), 111.3 (d,  $J^2$  = 21.4 Hz), 96.5 (d,  $J^3$  = 2.0 Hz), 88.0 (d,  $J^3$  = 1.8 Hz), 62.1, 58.5, 52.1, 23.1, 16.7, 13.9, 13.6 ppm; HRMS (ESI): calcd for  $\text{C}_{39}\text{H}_{32}\text{BrF}_2\text{NO}_4\text{SNa}$ :  $[\text{M}+\text{Na}]^+$  750.1096, found 714.1085.

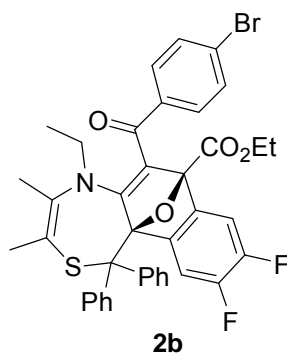

Compound **2c**: 96 % yield, yellow solid; m.p.224–226 °C; IR (KBr)  $\nu_{\max}$  3059, 2978, 2929, 1748, 1586, 1444, 1314, 1129, 1079, 753, 696  $\text{cm}^{-1}$ ;  $^1\text{H NMR}$  (400 MHz,  $\text{CDCl}_3$ , 25 °C, tetramethylsilane)  $\delta$  = 7.70–7.61 (m, 6H), 7.46 (t,  $J$  = 7.6 Hz, 3H), 7.41(s, 1H), 7.22 (t,  $J$  = 7.2 Hz, 2H), 7.15 (t,  $J$  = 6.8 Hz, 3H), 7.11 (d,  $J$  = 6.8 Hz, 1H), 4.15 (q,  $J$  = 3.6 Hz, 2H), 2.85 (q,  $J$  = 6.4 Hz, 1H), 2.42 (q,  $J$  = 6.4 Hz, 1H), 2.12 (s, 3H), 2.10 (s, 3H), 1.60 (s, 3H), 1.24 (s, 3H), 1.17 (t,  $J$  = 7.2 Hz, 3H), 0.55 ppm (t,  $J$  = 6.8 Hz, 3H);  $^{13}\text{C NMR}$  (100 MHz,  $\text{CDCl}_3$ , 25 °C, tetramethylsilane)  $\delta$  = 189.4, 168.8, 166.5, 145.2, 145.0, 142.9, 141.6, 141.6, 138.5, 132.8, 131.4, 130.2, 130.1, 129.7, 129.3, 126.7, 126.6, 126.4, 126.1, 126.0, 121.8, 119.2, 96.0, 87.9, 61.3, 58.3, 51.3, 22.7, 19.6, 19.5, 16.3, 13.5, 13.0 ppm; HRMS (ESI): calcd for  $\text{C}_{41}\text{H}_{38}\text{BrNO}_4\text{SNa}$ :  $[\text{M}+\text{Na}]^+$  742.1597, found 742.1586.

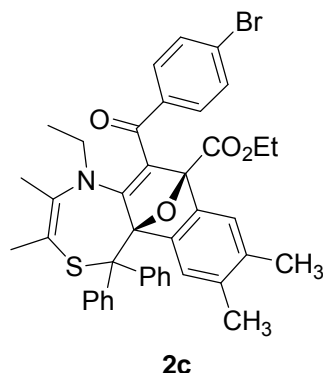

Compound **2d**: 93 % yield, yellow solid; m.p.228–230 °C; **IR** (KBr)  $\nu_{\max}$  3057, 2978, 2932, 1751, 1586, 1400, 1323, 1071, 750, 697  $\text{cm}^{-1}$ ; **<sup>1</sup>H NMR** (400 MHz, CDCl<sub>3</sub>, 25 °C, tetramethylsilane)  $\delta$  = 7.71–7.62 (m, 6H), 7.54 (s, 1H), 7.47 (d,  $J$  = 10.0 Hz, 3H), 7.26–7.10 (m, 6H), 4.16 (q,  $J$  = 7.2 Hz, 2H), 2.88–2.62 (m, 5H), 2.43 (q,  $J$  = 6.8 Hz, 1H), 1.97 (t,  $J$  = 7.6 Hz, 2H), 1.59 (s, 3H), 1.23 (s, 3H), 1.18 (t,  $J$  = 7.2 Hz, 3H), 0.56 ppm (t,  $J$  = 7.2 Hz, 3H); **<sup>13</sup>C NMR** (100 MHz, CDCl<sub>3</sub>, 25 °C, tetramethylsilane)  $\delta$  = 189.8, 169.2, 166.8, 146.5, 146.2, 143.3, 142.0, 141.8, 141.1, 139.8, 138.9, 131.7, 130.6, 130.5, 130.0, 129.7, 127.1, 126.9, 126.8, 126.8, 126.3, 121.4, 119.5, 117.0, 96.2, 88.1, 61.6, 58.6, 32.4, 32.4, 25.3, 23.0, 16.6, 13.8, 13.4 ppm; **HRMS (ESI)**: calcd for C<sub>42</sub>H<sub>38</sub>BrNO<sub>4</sub>SNa: [M+Na]<sup>+</sup> 754.1597, found 754.1584.

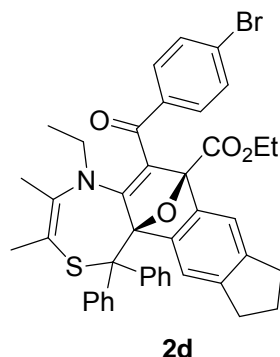

Compound **2e**: 90 % yield, pale yellow solid; m.p.209–211 °C; **IR** (KBr)  $\nu_{\max}$  3059, 2980, 2897, 1749, 1586, 1460, 1275, 1070, 1037, 858, 750, 699  $\text{cm}^{-1}$ ; **<sup>1</sup>H NMR** (400 MHz, CDCl<sub>3</sub>, 25 °C, tetramethylsilane)  $\delta$  = 7.70–7.65 (m, 6H), 7.44 (d,  $J$  = 8.0 Hz, 2H), 7.33 (s, 1H), 7.26–7.14 (m, 7H), 5.85 (d,  $J$  = 8.8 Hz, 2H), 4.17 (q,  $J$  = 6.8 Hz, 2H), 2.85 (q,  $J$  = 6.8 Hz, 1H), 2.46 (q,  $J$  = 6.8 Hz, 1H), 1.59 (s, 3H), 1.23 (s, 3H), 1.18 (t,  $J$  = 7.2 Hz, 3H), 0.60 ppm (t,  $J$  = 7.2 Hz, 3H); **<sup>13</sup>C NMR** (100 MHz, CDCl<sub>3</sub>, 25 °C, tetramethylsilane)  $\delta$  = 189.7, 169.5, 166.6, 144.6, 143.6, 143.0, 142.7, 142.4, 141.9, 141.8, 138.8, 131.8, 130.5, 130.4, 130.0, 129.8, 127.2, 127.1, 127.0, 126.8, 126.5, 119.5, 107.7, 103.9, 101.2, 96.4, 88.2, 61.8, 58.5, 51.8, 23.0, 16.6, 13.8, 13.5 ppm; **HRMS (ESI)**: calcd for C<sub>40</sub>H<sub>34</sub>BrNO<sub>6</sub>SNa: [M+Na]<sup>+</sup> 758.1182, found 758.1160.

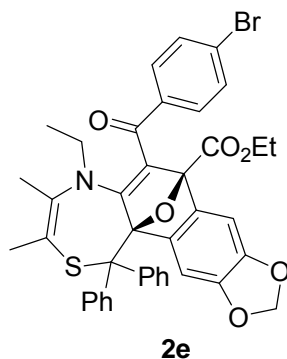

Compound **2f**: 46 % yield, white solid; m.p.223–225 °C; IR (KBr)  $\nu_{\max}$  3056, 2978, 2895, 1744, 1582, 1456, 1270, 1068, 1035, 855, 745, 698  $\text{cm}^{-1}$ ;  $^1\text{H NMR}$  (400 MHz,  $\text{CDCl}_3$ , 25 °C, tetramethylsilane)  $\delta$  = 7.96 (s, 1H), 7.78 (d,  $J$  = 7.2 Hz, 2H), 7.71–7.64 (m, 5H), 7.48 (d,  $J$  = 7.6 Hz, 2H), 7.42–7.41 (m, 4H), 7.35–7.32 (m, 1H), 7.25–7.12 (m, 7H), 4.21–4.16 (m, 2H), 2.86 (q,  $J$  = 6.8 Hz, 1H), 2.45 (q,  $J$  = 6.8 Hz, 1H), 1.62 (s, 3H), 1.24 (s, 3H), 1.21 (t,  $J$  = 7.2 Hz, 3H), 0.53 ppm (t,  $J$  = 7.2 Hz, 3H);  $^{13}\text{C NMR}$  (100 MHz,  $\text{CDCl}_3$ , 25 °C, tetramethylsilane)  $\delta$  = 189.9, 168.2, 166.6, 149.0, 146.7, 143.1, 142.0, 141.9, 141.4, 138.7, 137.4, 131.9, 130.6, 130.5, 130.1, 129.4, 128.6, 127.3, 127.15, 127.11, 127.08, 127.0, 126.9, 126.5, 124.7, 124.3, 120.6, 119.5, 96.4, 88.3, 61.8, 58.6, 51.6, 23.0, 16.6, 13.8, 13.4 ppm; **HRMS (ESI)**: calcd for  $\text{C}_{45}\text{H}_{38}\text{BrNO}_4\text{SNa}$ :  $[\text{M}+\text{Na}]^+$  790.1597, found 790.1592.

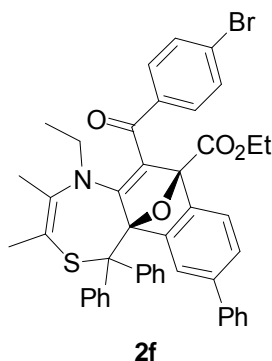

Compound **2g**: 46 % yield, white solid; m.p.230–232 °C; IR (KBr)  $\nu_{\max}$  3056, 2976, 2898, 1746, 1586, 1457, 1272, 1067, 1036, 854, 745, 699  $\text{cm}^{-1}$ ;  $^1\text{H NMR}$  (400 MHz,  $\text{CDCl}_3$ , 25 °C, tetramethylsilane)  $\delta$  = 7.93 (s, 1H), 7.79 (d,  $J$  = 8.0 Hz, 1H), 7.74 (d,  $J$  = 7.6 Hz, 2H), 7.68 (dd,  $J_1 = J_2 = 8.4$  Hz, 4H), 7.57 (d,  $J$  = 7.2 Hz, 2H), 7.49 (d,  $J$  = 7.2 Hz, 2H), 7.38 (t,  $J$  = 7.6 Hz, 2H), 7.31–7.24 (m, 3H), 7.20–7.17 (m, 3H), 7.14 (d,  $J$  = 7.2 Hz, 1H), 7.06 (d,  $J$  = 6.8 Hz, 1H), 4.21–4.18 (m, 2H), 2.86 (q,  $J$  = 6.8 Hz, 1H), 2.45 (q,  $J$  = 7.2 Hz, 1H), 1.61 (s, 3H), 1.26 (s, 3H), 1.21 (t,  $J$  = 7.2 Hz, 3H), 0.56 ppm (t,  $J$  = 6.8 Hz, 3H);  $^{13}\text{C NMR}$  (100 MHz,  $\text{CDCl}_3$ , 25 °C, tetramethylsilane)  $\delta$  = 189.6, 168.4, 166.6, 148.6, 147.1, 143.1, 141.92, 141.86, 140.6, 138.8, 138.3, 131.8, 130.54, 130.50, 130.0, 129.3, 128.5, 127.2, 127.11, 127.05, 126.94, 126.87, 126.5, 125.0, 123.1, 119.60, 119.56, 96.5, 88.2, 61.8, 58.6, 51.8, 23.0, 16.7, 13.8, 13.4 ppm; **HRMS (ESI)**: calcd for  $\text{C}_{45}\text{H}_{38}\text{BrNO}_4\text{SNa}$ :  $[\text{M}+\text{Na}]^+$  790.1597, found 790.1595.

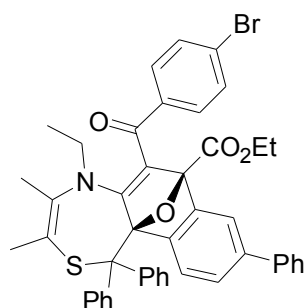

**2g**

Compound **2h**: 88 % yield, pale yellow oil; **IR** (film)  $\nu_{\max}$  3058, 2976, 2928, 1751, 1586, 1442, 1323, 1056, 772, 699  $\text{cm}^{-1}$ ;  **$^1\text{H NMR}$**  (400 MHz,  $\text{CDCl}_3$ , 25 °C, tetramethylsilane)  $\delta$  = 8.07 (d,  $J$  = 7.6 Hz, 1H), 7.85 (d,  $J$  = 6.8 Hz, 3H), 7.65 (dd,  $J_1 = J_2 = 6.8$  Hz, 4H), 7.35 (t,  $J$  = 8.0 Hz, 2H), 7.24–7.04 (m, 3H), 4.22 (dd,  $J_1 = J_2 = 6.8$  Hz, 2H), 2.69–2.33 (m, 4H), 1.43 (d,  $J$  = 7.2 Hz, 3H), 1.36 (s, 3H), 1.20 (t,  $J$  = 7.2 Hz, 3H), 0.81 (t,  $J$  = 7.2 Hz, 3H), 0.44 ppm (t,  $J$  = 7.2 Hz, 3H);  **$^{13}\text{C NMR}$**  (100 MHz,  $\text{CDCl}_3$ , 25 °C, tetramethylsilane)  $\delta$  = 189.9, 170.0, 166.5, 148.5, 148.3, 140.0, 140.0, 138.8, 131.8, 130.0, 129.5, 127.7, 127.3, 127.1, 126.6, 126.0, 124.6, 124.4, 121.2, 121.1, 98.3, 88.8, 61.6, 54.8, 52.2, 31.9, 23.4, 16.5, 13.8, 13.1, 11.0 ppm; **HRMS (ESI)**: calcd for  $\text{C}_{35}\text{H}_{34}\text{BrNO}_4\text{SNa}$ :  $[\text{M}+\text{Na}]^+$  666.1284, found 666.1270.

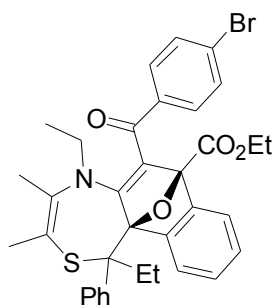

**2h**

Compound **2i**: 92 % yield, pale yellow oil; **IR** (film)  $\nu_{\max}$  3059, 2978, 2930, 1749, 1614, 1466, 1225, 1054, 772, 699  $\text{cm}^{-1}$ ;  **$^1\text{H NMR}$**  (400 MHz,  $\text{CDCl}_3$ , 25 °C, tetramethylsilane)  $\delta$  = 8.08 (d,  $J$  = 7.6 Hz, 1H), 7.85 (q,  $J$  = 6.8 Hz, 3H), 7.65 (dd,  $J_1 = 8.4$  Hz,  $J_2 = 8.8$  Hz, 4H), 7.34 (t,  $J$  = 7.6 Hz, 2H), 7.21 (t,  $J$  = 7.6 Hz, 1H), 7.15 (t,  $J$  = 7.2 Hz, 1H), 7.07–7.03 (m, 1H), 4.24–4.18 (m, 2H), 2.70 (q,  $J$  = 6.8 Hz, 1H), 2.36 (q,  $J$  = 6.8 Hz, 1H), 1.96 (s, 3H), 1.45 (s, 3H), 1.36 (s, 3H), 1.21 (t,  $J$  = 7.2 Hz, 3H), 0.46 ppm (t,  $J$  = 6.8 Hz, 3H);  **$^{13}\text{C NMR}$**  (100 MHz,  $\text{CDCl}_3$ , 25 °C, tetramethylsilane)  $\delta$  = 189.5, 168.0, 166.5, 148.8, 148.4, 142.7, 139.0, 138.8, 131.9, 130.1, 128.9, 127.7, 127.4, 127.2, 126.8, 126.1, 124.6, 124.5, 121.8, 121.2, 97.7, 88.9, 61.8, 52.2, 50.7, 25.2, 23.6, 16.8, 13.9, 13.2 ppm; **HRMS (ESI)**: calcd for  $\text{C}_{34}\text{H}_{32}\text{BrNO}_4\text{SNa}$ :  $[\text{M}+\text{Na}]^+$  652.1128, found 652.1116.

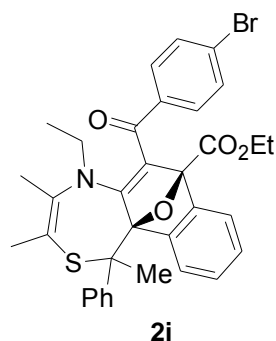

Compound **2j**: 96 % yield, pale yellow solid; m.p.199–201 °C; **IR** (KBr)  $\nu_{\max}$  3059, 2977, 2931, 1750, 1551, 1445, 1181, 847, 747, 699  $\text{cm}^{-1}$ ; **<sup>1</sup>H NMR** (400 MHz, CDCl<sub>3</sub>, 25 °C, tetramethylsilane)  $\delta$  = 7.80–7.67 (m, 6H), 7.55 (d,  $J$  = 7.2 Hz, 1H), 7.47 (t,  $J$  = 7.0 Hz, 4H), 7.24 (d,  $J$  = 7.2 Hz, 2H), 7.18–7.09 (m, 4H), 6.92 (t,  $J$  = 7.2 Hz, 1H), 6.78 (t,  $J$  = 8.0 Hz, 1H), 4.17–4.12 (m, 2H), 2.77 (q,  $J$  = 6.8 Hz, 1H), 2.42 (q,  $J$  = 6.8 Hz, 1H), 1.57 (s, 3H), 1.22 (s, 3H), 1.17 (t,  $J$  = 7.2 Hz, 3H), 0.49 ppm (t,  $J$  = 7.2 Hz, 3H); **<sup>13</sup>C NMR** (100 MHz, CDCl<sub>3</sub>, 25 °C, tetramethylsilane)  $\delta$  = 191.2, 168.0, 166.8, 148.3, 147.9, 143.2, 142.4, 142.0, 140.2, 132.4, 130.7, 130.5, 130.2, 128.6, 128.5, 127.1, 126.9, 126.8, 126.4, 125.5, 124.8, 124.2, 120.7, 119.2, 96.5, 88.3, 61.7, 58.6, 51.4, 22.9, 16.5, 13.8, 13.2 ppm; **HRMS (ESI)**: calcd for C<sub>39</sub>H<sub>35</sub>NO<sub>4</sub>SNa: [M+Na]<sup>+</sup> 636.2179, found 636.2181.

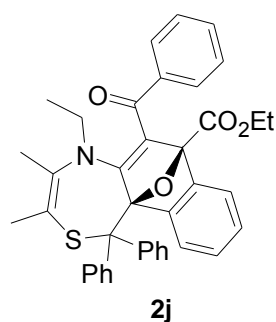

Compound **2k**: 95 % yield, pale yellow solid; m.p.208–211 °C; **IR** (KBr)  $\nu_{\max}$  3055, 2998, 2948, 1752, 1701, 1561, 1201, 1142, 808, 754, 697  $\text{cm}^{-1}$ ; **<sup>1</sup>H NMR** (400 MHz, CDCl<sub>3</sub>, 25 °C, tetramethylsilane)  $\delta$  = 7.77 (d,  $J$  = 8.0 Hz, 2H), 7.62 (d,  $J$  = 7.6 Hz, 1H), 7.42 (d,  $J$  = 8.0 Hz, 2H), 7.38 (d,  $J$  = 6.8 Hz, 1H), 7.19–7.08 (m, 6H), 6.83 (d,  $J$  = 7.6 Hz, 1H), 6.74 (t,  $J$  = 7.6 Hz, 1H), 4.33 (q,  $J$  = 7.2 Hz, 2H), 3.16 (q,  $J$  = 6.9 Hz, 1H), 2.62 (q,  $J$  = 6.8 Hz, 1H), 1.79 (s, 3H), 1.35 (t,  $J$  = 7.2 Hz, 3H), 1.28 (s, 9H), 1.21 (s, 3H), 0.51 ppm (t,  $J$  = 7.2 Hz, 3H); **<sup>13</sup>C NMR** (100 MHz, CDCl<sub>3</sub>, 25 °C, tetramethylsilane)  $\delta$  = 210.5, 167.1, 159.6, 148.8, 147.8, 143.4, 143.3, 142.4, 131.7, 130.8, 130.5, 127.0, 126.8, 126.6, 126.1, 124.8, 124.7, 124.1, 119.8, 118.3, 95.8, 89.0, 61.8, 58.0, 50.0, 45.3, 27.0, 22.8, 17.3, 14.1, 13.7 ppm; **HRMS (ESI)**: calcd for C<sub>37</sub>H<sub>39</sub>NO<sub>4</sub>SNa: [M+Na]<sup>+</sup> 616.2492, found 616.2493.

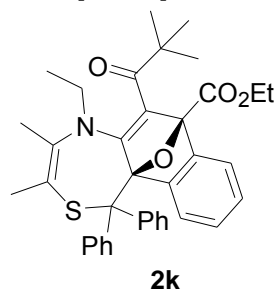

Compound **7a**: 97 % yield, pale yellow solid; m.p.175–178 °C; **IR** (KBr)  $\nu_{\max}$  3060, 2990, 2951, 1754, 1698, 1577, 1438, 1203, 927, 756, 691  $\text{cm}^{-1}$ ;  **$^1\text{H NMR}$**  (400 MHz,  $\text{CDCl}_3$ , 25 °C, tetramethylsilane)  $\delta$  = 8.03 (d,  $J$  = 7.2 Hz, 1H), 7.78 (d,  $J$  = 7.2 Hz, 1H), 7.46 (d,  $J$  = 8.0 Hz, 2H), 7.07 (dd,  $J_1$  = 8.4 Hz,  $J_2$  = 8.0 Hz, 4H), 3.89 (s, 3H), 3.71(s, 3H), 2.80 (s, 3H), 2.29(s, 3H), 1.90 (s, 3H), 1.71 (s, 3H), 1.33 ppm (s, 3H);  **$^{13}\text{C NMR}$**  (100 MHz,  $\text{CDCl}_3$ , 25 °C, tetramethylsilane)  $\delta$  = 169.5, 167.6, 162.7, 148.9, 148.7, 140.9, 139.0, 136.1, 129.6, 128.0, 125.9, 124.5, 120.6, 119.3, 118.3, 96.8, 87.3, 52.5, 51.1, 50.2, 44.2, 25.0, 23.3, 20.9, 17.7 ppm; **HRMS (ESI)**: calcd for  $\text{C}_{28}\text{H}_{29}\text{NO}_5\text{SNa}$ :  $[\text{M}+\text{Na}]^+$  514.1659, found 514.1668.

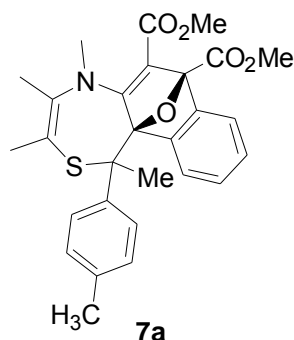

Compound **7b**: 96 % yield, pale yellow solid; m.p.168–170 °C; **IR** (KBr)  $\nu_{\max}$  3064, 2972, 2950, 1756, 1694, 1575, 1438, 1206, 754, 698  $\text{cm}^{-1}$ ;  **$^1\text{H NMR}$**  (400 MHz,  $d_6$ -Acetone, 25 °C, tetramethylsilane)  $\delta$  = 8.03 (d,  $J$  = 6.4 Hz, 1H), 7.74–7.72 (m, 1H), 7.65 (d,  $J$  = 7.6 Hz, 2H), 7.32–7.28 (m, 2H), 7.22 (d,  $J$  = 8.4 Hz, 2H), 3.87 (s, 3H), 3.68 (s, 3H), 3.43–3.35 (m, 1H), 2.90–2.82 (m, 1H), 1.71 (s, 3H), 1.25 (s, 3H), 0.72 (t,  $J$  = 7.6 Hz, 3H), 0.45 ppm (t,  $J$  = 7.2 Hz, 3H);  **$^{13}\text{C NMR}$**  (100 MHz,  $d_6$ -Acetone, 25 °C, tetramethylsilane)  $\delta$  = 206.1, 169.4, 168.1, 163.4, 150.2, 149.6, 140.5, 130.6, 128.0, 127.3, 126.7, 125.5, 125.4, 121.9, 121.7, 98.3, 88.1, 55.3, 52.8, 51.4, 49.8, 32.0, 23.0, 17.3, 12.4, 11.2 ppm; **HRMS (ESI)**: calcd for  $\text{C}_{29}\text{H}_{31}\text{NO}_5\text{SNa}$ :  $[\text{M}+\text{Na}]^+$  528.1815, found 528.1810.

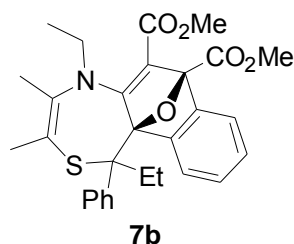

Compound **7c**: 93 % yield, white solid; m.p.236–238 °C; **IR** (KBr)  $\nu_{\max}$  3660, 2990, 2949, 1756, 1692, 1570, 1446, 1200, 1009, 759, 690  $\text{cm}^{-1}$ ;  **$^1\text{H NMR}$**  (400 MHz,  $\text{CDCl}_3$ , 25 °C, tetramethylsilane)  $\delta$  = 7.99 (d,  $J$  = 7.2 Hz, 1H), 7.78 (d,  $J$  = 7.2 Hz, 1H), 7.48 (d,  $J$  = 8.8 Hz, 2H), 7.40 (d,  $J$  = 8.8 Hz, 2H), 7.11–7.00 (m, 2H), 3.90 (s, 3H), 3.72 (s, 3H), 3.49–3.40 (m, 1H), 2.91–2.85 (m, 1H), 1.90 (s, 3H), 1.72 (s, 3H), 1.33 (s, 3H), 0.51 ppm (t,  $J$  = 7.2 Hz, 3H);  **$^{13}\text{C NMR}$**  (100 MHz,  $\text{CDCl}_3$ , 25 °C, tetramethylsilane)  $\delta$  = 167.9, 167.4, 162.7, 148.7, 148.4, 141.5, 140.5, 130.7, 130.3, 126.0, 124.6, 124.5, 121.4, 120.8, 120.5, 120.4, 96.8, 87.2, 52.6, 51.1, 49.9, 49.6, 24.8, 23.1, 17.6, 12.1 ppm; **HRMS (ESI)**: calcd for  $\text{C}_{28}\text{H}_{28}\text{BrNO}_5\text{SNa}$ :  $[\text{M}+\text{Na}]^+$  592.0764, found 592.0756.



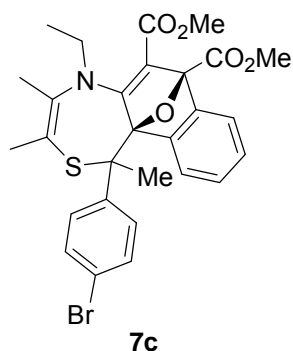

Compound **7d**: 94 % yield, pale yellow solid; m.p.231–234 °C; **IR** (KBr)  $\nu_{\max}$  3072, 2960, 2922, 1760, 1693, 1560, 1441, 1200, 931, 754, 671  $\text{cm}^{-1}$ ; **<sup>1</sup>H NMR** (400 MHz, CDCl<sub>3</sub>, 25 °C, tetramethylsilane)  $\delta$  = 8.04 (d,  $J$  = 6.8 Hz, 1H), 7.79 (d,  $J$  = 7.2 Hz, 1H), 7.70 (d,  $J$  = 7.2 Hz, 1H), 7.36 (d,  $J$  = 7.2 Hz, 1H), 7.17–7.00 (m, 4H), 3.91 (s, 3H), 3.72 (s, 3H), 3.49–3.40 (m, 1H), 2.97–2.92 (m, 1H), 2.13 (s, 3H), 1.63 (s, 3H), 1.47 (s, 3H), 0.52 ppm (t,  $J$  = 7.2 Hz, 3H); **<sup>13</sup>C NMR** (100 MHz, CDCl<sub>3</sub>, 25 °C, tetramethylsilane)  $\delta$  = 167.8, 167.6, 162.7, 148.8, 148.6, 140.2, 138.4, 133.6, 132.6, 132.1, 128.1, 125.9, 125.5, 125.1, 124.5, 121.9, 120.5, 118.8, 98.6, 87.0, 52.5, 51.2, 51.1, 49.7, 22.4, 22.1, 17.4, 12.1 ppm; **HRMS (ESI)**: calcd for C<sub>28</sub>H<sub>28</sub>ClNO<sub>5</sub>SNa: [M+Na]<sup>+</sup> 548.1269, found 548.1247.

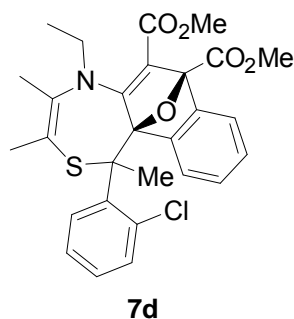

Compound **7e**: 91 % yield, yellow oil; **IR** (film)  $\nu_{\max}$  3059, 2950, 2839, 1755, 1693, 1569, 1444, 1199, 1031, 831, 759  $\text{cm}^{-1}$ ; **<sup>1</sup>H NMR** (400 MHz, CDCl<sub>3</sub>, 25 °C, tetramethylsilane)  $\delta$  = 8.01 (d,  $J$  = 7.2 Hz, 1H), 7.78 (d,  $J$  = 7.2 Hz, 1H), 7.51 (d,  $J$  = 9.2 Hz, 2H), 7.10–7.00 (m, 2H), 6.82 (d,  $J$  = 8.8 Hz, 2H), 3.89 (s, 3H), 3.78 (s, 3H), 3.72 (s, 3H), 3.44 (q,  $J$  = 7.2 Hz, 1H), 2.90 (q,  $J$  = 6.9 Hz, 1H), 1.91 (s, 3H), 1.72 (s, 3H), 1.32 (s, 3H), 0.52 ppm (t,  $J$  = 6.8 Hz, 3H); **<sup>13</sup>C NMR** (100 MHz, CDCl<sub>3</sub>, 25 °C, tetramethylsilane)  $\delta$  = 168.5, 167.5, 162.7, 157.8, 148.9, 148.6, 140.1, 134.2, 130.0, 125.8, 124.6, 124.5, 122.1, 120.6, 119.9, 112.5, 97.1, 87.0, 55.1, 52.4, 51.0, 50.1, 49.5, 24.9, 23.1, 17.5, 14.0 ppm; **HRMS (ESI)**: calcd for C<sub>29</sub>H<sub>31</sub>NO<sub>6</sub>SNa: [M+Na]<sup>+</sup> 544.1764, found 544.1752.

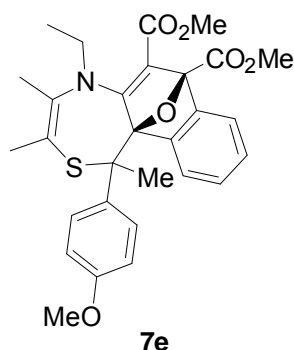

Compound **7f**: 92 % yield, pale yellow solid; m.p.174–177 °C; **IR** (KBr)  $\nu_{\max}$  3057, 2972, 2949, 1755, 1690, 1570, 1438, 1210, 740, 696  $\text{cm}^{-1}$ ;  **$^1\text{H NMR}$**  (400 MHz,  $\text{CDCl}_3$ , 25 °C, tetramethylsilane)  $\delta$  = 7.75 (s, 1H), 7.59 (d,  $J$  = 8.4 Hz, 2H), 7.54 (s, 1H), 7.29–7.26 (m, 2H), 7.16 (t,  $J$  = 7.6 Hz, 1H), 3.88 (s, 3H), 3.70 (s, 3H), 3.44 (q,  $J$  = 6.9 Hz, 1H), 2.82 (q,  $J$  = 7.6 Hz, 1H), 2.59–2.51 (m, 2H), 2.25 (s, 6H), 1.69 (s, 3H), 1.24 (s, 3H), 0.78 (t,  $J$  = 7.6 Hz, 3H), 0.53 ppm (t,  $J$  = 7.2 Hz, 3H);  **$^{13}\text{C NMR}$**  (100 MHz,  $\text{CDCl}_3$ , 25 °C, tetramethylsilane)  $\delta$  = 170.2, 167.9, 163.0, 146.7, 145.7, 139.5, 133.6, 132.1, 129.4, 127.2, 126.4, 126.1, 122.2, 120.2, 97.3, 86.9, 54.6, 52.3, 50.9, 49.5, 31.3, 22.6, 19.9, 19.8, 17.0, 12.3, 10.8 ppm; **HRMS (ESI)**: calcd for  $\text{C}_{31}\text{H}_{35}\text{NO}_5\text{SNa}$ :  $[\text{M}+\text{Na}]^+$  556.2128, found 556.2116.

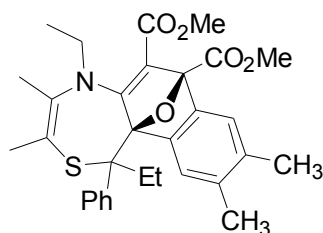

**7f**

Compound **7g**: 95 % yield, pale yellow solid; m.p.160–163 °C; **IR** (KBr)  $\nu_{\max}$  2968, 2950, 1754, 1693, 1571, 1461, 1278, 1035, 740, 695  $\text{cm}^{-1}$ ;  **$^1\text{H NMR}$**  (400 MHz,  $\text{CDCl}_3$ , 25 °C, tetramethylsilane)  $\delta$  = 7.59 (s, 1H), 7.56 (d,  $J$  = 7.6 Hz, 2H), 7.34 (s, 1H), 7.27 (t,  $J$  = 8.4 Hz, 2H), 7.17 (t,  $J$  = 7.2 Hz, 1H), 5.98 (d,  $J$  = 7.2 Hz, 2H), 3.87 (s, 3H), 3.70 (s, 3H), 3.47 (q,  $J$  = 7.1 Hz, 1H), 2.88 (q,  $J$  = 6.9 Hz, 1H), 2.53 (q,  $J$  = 7.5 Hz, 2H), 1.69 (s, 3H), 1.23 (s, 3H), 0.81 (t,  $J$  = 7.6 Hz, 3H), 0.60 ppm (t,  $J$  = 7.2 Hz, 3H);  **$^{13}\text{C NMR}$**  (100 MHz,  $\text{CDCl}_3$ , 25 °C, tetramethylsilane)  $\delta$  = 170.8, 167.7, 162.9, 145.1, 144.2, 143.9, 142.4, 139.4, 129.5, 127.3, 126.5, 120.3, 107.6, 104.1, 101.4, 97.3, 87.0, 54.6, 52.5, 51.1, 49.6, 31.5, 22.7, 17.1, 12.5, 10.8 ppm; **HRMS (ESI)**: calcd for  $\text{C}_{30}\text{H}_{31}\text{NO}_7\text{SNa}$ :  $[\text{M}+\text{Na}]^+$  572.1713, found 572.1722.

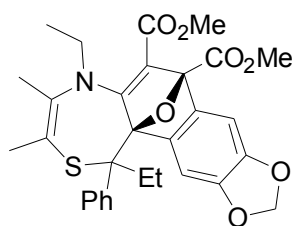

**7g**

Compound **7h**: 90 % yield, pale yellow solid; m.p.175–178 °C; **IR** (KBr)  $\nu_{\max}$  3057, 2951, 2918, 1754, 1686, 1572, 1439, 1205, 754, 700  $\text{cm}^{-1}$ ;  **$^1\text{H NMR}$**  (400 MHz,  $d_6$ -Acetone, 25 °C, tetramethylsilane)  $\delta$  = 7.74 (d,  $J$  = 7.6 Hz, 1H), 7.69 (d,  $J$  = 7.6 Hz, 2H), 7.55 (d,  $J$  = 7.2 Hz, 1H), 7.27–7.11 (m, 8H), 6.88–6.79 (m, 2H), 3.89 (s, 3H), 3.70 (s, 3H), 2.78 (s, 3H), 1.85 (s, 3H), 1.21 ppm (s, 3H);  **$^{13}\text{C NMR}$**  (100 MHz,  $d_6$ -Acetone, 25 °C, tetramethylsilane)  $\delta$  = 169.0, 167.2, 162.4, 148.8, 148.3, 144.3, 143.2, 142.4, 130.6, 127.0, 127.0, 126.7, 126.5, 125.3, 125.0, 124.2, 121.1, 120.4, 116.8, 96.0, 87.1, 58.5, 52.0, 50.7, 43.2, 22.1, 16.7 ppm; **HRMS (ESI)**: calcd for  $\text{C}_{32}\text{H}_{29}\text{NO}_5\text{SNa}$ :  $[\text{M}+\text{Na}]^+$  562.1659, found 562.1658.

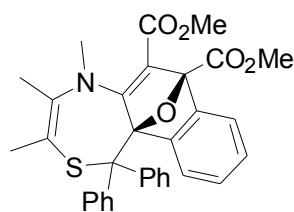

**7h**

Compound **7i**: 97 % yield, pale yellow solid; m.p.227–231 °C; **IR** (KBr)  $\nu_{\max}$  3084, 2976, 2946, 1751, 1705, 1589, 1437, 1206, 756, 721  $\text{cm}^{-1}$ ;  **$^1\text{H NMR}$**  (400 MHz,  $\text{CDCl}_3$ , 25 °C, tetramethylsilane)  $\delta$  = 9.87 (d,  $J$  = 8.0 Hz, 1H), 8.78–8.72 (m, 2H), 8.00 (d,  $J$  = 8.0 Hz, 1H), 7.66–7.54 (m, 6H), 7.29 (q,  $J$  = 7.6 Hz, 2H), 7.17 (t,  $J$  = 7.6 Hz, 1H), 3.91 (s, 3H), 3.72 (s, 3H), 3.27 (q,  $J$  = 6.8 Hz, 1H), 2.81 (q,  $J$  = 7.2 Hz, 1H), 2.69 (q,  $J$  = 7.2 Hz, 1H), 2.52 (q,  $J$  = 6.7 Hz, 1H), 1.87 (s, 3H), 1.08 (s, 3H), 0.82 (t,  $J$  = 7.6 Hz, 3H), 0.30 ppm (t,  $J$  = 7.2 Hz, 3H);  **$^{13}\text{C NMR}$**  (100 MHz,  $\text{CDCl}_3$ , 25 °C, tetramethylsilane)  $\delta$  = 169.8, 167.8, 165.5, 149.7, 149.3, 142.5, 140.5, 130.3, 129.8, 129.6, 128.8, 128.3, 127.0, 126.8, 126.5, 126.1, 125.9, 125.8, 125.7, 125.0, 123.5, 123.0, 120.8, 102.6, 88.6, 53.6, 53.0, 51.2, 47.2, 30.5, 21.9, 15.5, 12.9, 11.1 ppm; **HRMS (ESI)**: calcd for  $\text{C}_{37}\text{H}_{35}\text{NO}_5\text{SNa}$ :  $[\text{M}+\text{Na}]^+$  628.2128, found 628.2126.

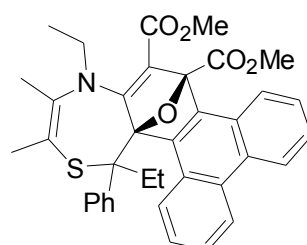

**7i**

Compound **12a**: 85 % yield, pale yellow oil; **IR** (film)  $\nu_{\max}$  3048, 2950, 2922, 1761, 1684, 1572, 1438, 1204, 752  $\text{cm}^{-1}$ ;  **$^1\text{H NMR}$**  (400 MHz,  $\text{CDCl}_3$ , 25 °C, tetramethylsilane)  $\delta$  = 7.87 (d,  $J$  = 7.6 Hz, 1H), 7.79 (d,  $J$  = 7.6 Hz, 1H), 7.60 (dd,  $J_1$  = 12.8 Hz,  $J_2$  = 8.4 Hz, 4H), 7.10 (t,  $J$  = 7.4 Hz, 1H), 6.99 (t,  $J$  = 7.4 Hz, 1H), 4.25–4.23 (m, 2H), 2.71–2.67 (m, 1H), 2.29–2.24 (m, 1H), 2.09 (s, 3H), 1.74 (s, 3H), 1.49 (s, 3H), 1.43 (s, 3H), 1.23 ppm (t,  $J$  = 6.6 Hz, 3H);  **$^{13}\text{C NMR}$**  (100 MHz,  $\text{CDCl}_3$ , 25 °C, tetramethylsilane)  $\delta$  = 190.2, 167.2, 166.7, 149.0, 147.1, 138.8, 138.4, 131.8, 131.6, 130.2, 127.3, 126.0, 124.5, 123.4, 121.2, 119.5, 99.2, 88.4, 61.7, 52.3, 42.8, 25.7, 25.0, 24.4, 16.8, 13.9, 13.2 ppm; **HRMS (ESI)**: calcd for  $\text{C}_{29}\text{H}_{30}\text{BrNO}_4\text{SNa}$ :  $[\text{M}+\text{Na}]^+$  590.0971, found 590.0966.

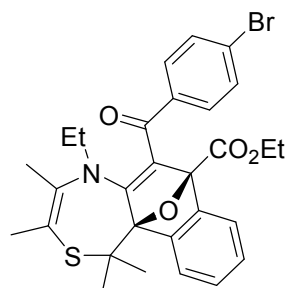

**12a**

Compound **12b**: 87 % yield, pale yellow solid; m.p.193–195 °C; **IR** (KBr)  $\nu_{\max}$  3059, 2970, 2954, 1760, 1692, 1575, 1436, 1211, 746, 695  $\text{cm}^{-1}$ ;  **$^1\text{H NMR}$**  (400 MHz,  $\text{CDCl}_3$ , 25 °C,

tetramethylsilane)  $\delta$  = 7.89 (d,  $J$  = 7.2 Hz, 1H), 7.80 (d,  $J$  = 7.6 Hz, 1H), 7.60 (dd,  $J_1$  = 12.8 Hz,  $J_2$  = 8.4 Hz, 4H), 7.09 (t,  $J$  = 7.4 Hz, 1H), 6.97 (t,  $J$  = 7.4 Hz, 1H), 4.29–4.23 (m, 2H), 2.67 (q,  $J$  = 6.8 Hz, 1H), 2.26 (q,  $J$  = 6.8 Hz, 1H), 2.12 (s, 3H), 2.05–1.71 (m, 10H), 1.59 (d,  $J$  = 12.0 Hz, 3H), 1.25 (t,  $J$  = 7.0 Hz, 3H), 0.42 ppm (t,  $J$  = 7.0 Hz, 3H);  $^{13}\text{C}$  NMR (100 MHz,  $\text{CDCl}_3$ , 25 °C, tetramethylsilane)  $\delta$  = 190.0, 168.0, 166.8, 149.0, 146.7, 139.4, 138.4, 131.7, 131.3, 130.2, 127.2, 125.9, 124.3, 124.0, 121.3, 118.4, 99.7, 80.0, 61.7, 52.8, 48.3, 30.8, 30.4, 25.5, 24.5, 21.5, 21.1, 17.1, 13.9, 13.2 ppm; **HRMS (ESI)**: calcd for  $\text{C}_{32}\text{H}_{34}\text{BrNO}_4\text{SNa}$ :  $[\text{M}+\text{Na}]^+$  630.1284, found 630.1272.

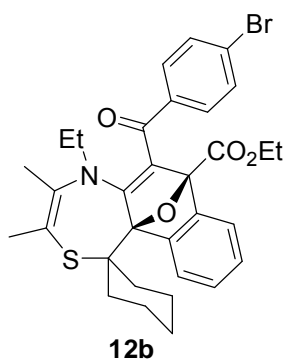

Compound **12c**: 90 % yield, pale yellow solid; m.p. 171–174 °C; **IR** (KBr)  $\nu_{\text{max}}$  3059, 2977, 2932, 1750, 1618, 1468, 1223, 1055, 770, 696  $\text{cm}^{-1}$ ;  $^1\text{H}$  NMR (500 MHz,  $d_6$ -Acetone, 25 °C, tetramethylsilane)  $\delta$  = 7.92 (d,  $J$  = 7.5 Hz, 1H), 7.75 (d,  $J$  = 8.0 Hz, 1H), 7.66 (d,  $J$  = 7.5 Hz, 2H), 7.35 (d,  $J$  = 7.5 Hz, 2H), 7.09 (t,  $J$  = 3.5 Hz, 1H), 7.02 (t,  $J$  = 7.0 Hz, 1H), 4.21–4.16 (m, 2H), 2.66 (t,  $J$  = 6.8 Hz, 1H), 2.41 (s, 3H), 2.19 (t,  $J$  = 7.0 Hz, 1H), 2.10 (s, 3H), 1.97–1.95 (m, 1H), 1.77 (s, 3H), 1.61–1.58 (m, 1H), 1.37 (s, 3H), 1.16 (t,  $J$  = 7.0 Hz, 3H), 1.04 (t,  $J$  = 7.0 Hz, 3H), 0.35 ppm (t,  $J$  = 7.0 Hz, 3H);  $^{13}\text{C}$  NMR (125 MHz,  $d_6$ -Acetone, 25 °C, tetramethylsilane)  $\delta$  = 190.6, 166.3, 165.1, 149.7, 148.0, 143.4, 140.1, 137.2, 132.0, 129.3, 128.7, 125.4, 124.2, 123.3, 121.4, 117.4, 100.1, 88.4, 61.0, 52.2, 47.4, 27.6, 23.6, 20.8, 19.2, 16.5, 13.4, 12.6, 7.8 ppm; **HRMS (ESI)**: calcd for  $\text{C}_{31}\text{H}_{35}\text{NO}_4\text{SNa}$ :  $[\text{M}+\text{Na}]^+$  540.2179, found 540.2171.

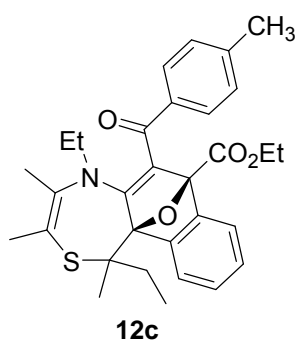

**General procedure for the Brønsted acid catalyzed rearrangements of 2a–k**

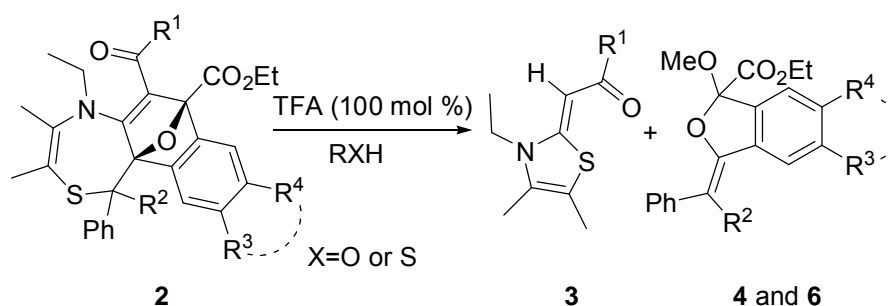

To a solution of **2** (0.13 mmol) in 2 ml CH<sub>2</sub>Cl<sub>2</sub>/alcohol (5:1) was added TFA (0.13 mmol), and the resulting solution was stirred at RT for indicated time. On completion of the reaction, the solvent was removed under vacuum. The residue was chromatographed on a silica gel column with a hexane–ethyl acetate mixture (10:1) to afford the desired products **4a–i**, **5** or **6a–e**, then with a hexane–ethyl acetate mixture (2:1) to afford the products **3a–b**.

### Characterization data for the compounds **3a–d**, **4a–i**, **5** and **6a–e**

Compound **3a**: Yellow solid; m.p. 128–130 °C; **IR** (film)  $\nu_{\max}$  3062, 2985, 2929, 1686, 1596, 1472, 1186, 896, 728 cm<sup>-1</sup>; **<sup>1</sup>H NMR** (400 MHz, CDCl<sub>3</sub>, 25 °C, tetramethylsilane):  $\delta$  = 7.82 (d,  $J$  = 8.8 Hz, 2H), 7.52 (d,  $J$  = 8.8 Hz, 2H), 6.28 (s, 1H), 3.95 (q,  $J$  = 7.2 Hz, 2H), 2.18 (s, 3H), 2.16 (s, 3H), 1.34 ppm (t,  $J$  = 7.6 Hz, 3H); **<sup>13</sup>C NMR** (100 MHz, CDCl<sub>3</sub>, 25 °C, tetramethylsilane):  $\delta$  = 180.0, 161.9, 139.4, 131.1, 130.1, 128.4, 124.1, 114.2, 84.5, 41.8, 12.9, 11.5, 11.1 ppm; **HRMS (ESI)**: calcd for C<sub>15</sub>H<sub>16</sub>BrNOSNa: [M+Na]<sup>+</sup> 360.0028, found 360.0027.

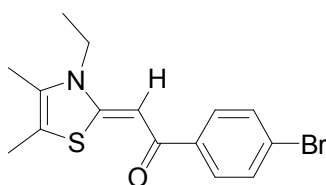

**3a**

Compound **3b**: Yellow solid; m.p. 116–118 °C; **IR** (film)  $\nu_{\max}$  3061, 2985, 2929, 1689, 1597, 1471, 1188, 1086, 895, 796, 717 cm<sup>-1</sup>; **<sup>1</sup>H NMR** (400 MHz, CDCl<sub>3</sub>, 25 °C, tetramethylsilane):  $\delta$  = 7.83 (s, 2H), 7.418 (t,  $J_1$  = 6.4 Hz,  $J_2$  = 8.0 Hz, 3H), 4.12 (s, 2H), 2.24 (s, 6H), 1.36 ppm (s, 3H); **<sup>13</sup>C NMR** (100 MHz, CDCl<sub>3</sub>, 25 °C, tetramethylsilane):  $\delta$  = 162.4, 137.8, 133.2, 130.8, 128.3, 127.2, 119.9, 43.1, 13.3, 11.5, 11.2 ppm; **HRMS (ESI)**: calcd for C<sub>15</sub>H<sub>17</sub>NOSNa: [M+Na]<sup>+</sup> 282.0923, found 282.0928.

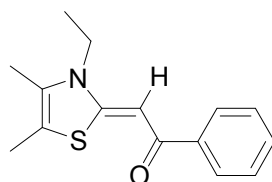

**3b**

Compound **3d**: Yellow solid; m.p. 134–136 °C; **IR** (film)  $\nu_{\max}$  3060, 2983, 2927, 1596, 1568, 1483, 1424, 1347, 1221, 887, 728 cm<sup>-1</sup>; **<sup>1</sup>H NMR** (400 MHz, CDCl<sub>3</sub>, 25 °C,

tetramethylsilane):  $\delta$  = 7.94–7.91 (m, 2H), 7.55 (d,  $J$  = 8.0 Hz, 1H), 7.40–7.34 (m, 3H), 7.32–7.28 (m, 1H), 7.16–7.09 (m, 2H), 6.43 (br, 1H), 3.56 ppm (s, 3H);  $^{13}\text{C}$  NMR (100 MHz,  $\text{CDCl}_3$ , 25 °C, tetramethylsilane):  $\delta$  = 184.4, 162.6, 139.8, 139.3, 130.9, 128.3, 127.1, 127.1, 126.5, 123.0, 122.3, 109.9, 87.3, 32.5 ppm; **HRMS (ESI)**: calcd for  $\text{C}_{16}\text{H}_{13}\text{NOSNa}$ :  $[\text{M}+\text{Na}]^+$  290.0610, found 290.0611.

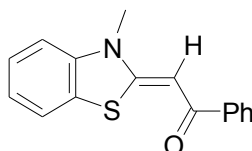

**3d**

Compound **4a**: White solid; m.p. 88–90 °C; **IR** (KBr)  $\nu_{\text{max}}$  3055, 2980, 2938, 1754, 1466, 1250, 1041, 762, 702  $\text{cm}^{-1}$ ;  $^1\text{H}$  NMR (400 MHz,  $\text{CDCl}_3$ , 25 °C, tetramethylsilane):  $\delta$  = 7.65 (d,  $J$  = 7.6 Hz, 2H), 7.53–7.46 (m, 4H), 7.36–7.25 (m, 5H), 7.21 (d,  $J$  = 7.2 Hz, 1H), 7.10 (d,  $J$  = 7.6 Hz, 1H), 6.08 (d,  $J$  = 8.4 Hz, 1H), 4.33–4.28 (m, 2H), 3.30 (s, 3H), 1.32 ppm (t,  $J$  = 7.2 Hz, 3H);  $^{13}\text{C}$  NMR (100 MHz,  $\text{CDCl}_3$ , 25 °C, tetramethylsilane):  $\delta$  = 167.1, 149.3, 139.1, 138.9, 136.4, 135.1, 131.2, 130.1, 129.6, 129.2, 128.7, 127.8, 126.4, 123.6, 123.2, 116.6, 107.4, 62.3, 51.6, 14.1 ppm; **HRMS (ESI)**: calcd for  $\text{C}_{25}\text{H}_{22}\text{O}_4\text{Na}$ :  $[\text{M}+\text{Na}]^+$  409.1410, found 409.1411.

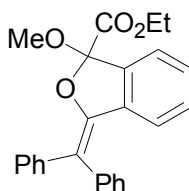

**4a**

Compound **4b**: Colorless oil; **IR** (film)  $\nu_{\text{max}}$  3058, 2981, 2939, 1755, 1494, 1351, 1044, 804, 703  $\text{cm}^{-1}$ ;  $^1\text{H}$  NMR (400 MHz,  $\text{CDCl}_3$ , 25 °C, tetramethylsilane):  $\delta$  = 7.63 (d,  $J$  = 7.2 Hz, 2H), 7.50–7.49 (m, 3H), 7.34–7.30 (m, 5H), 7.23–7.21 (m, 1H), 5.76–5.71 (m, 1H), 4.32 (q,  $J_1$  = 7.2 Hz,  $J_2$  = 1.2 Hz, 2H), 3.32 (s, 3H), 1.35 ppm (t,  $J$  = 7.2 Hz, 3H);  $^{13}\text{C}$  NMR (100 MHz,  $\text{CDCl}_3$ , 25 °C, tetramethylsilane):  $\delta$  = 166.3, 151.6 (dd,  $J$  = 249, 13 Hz), 150.6 (dd,  $J$  = 252, 15 Hz), 147.5 (q,  $J^3$  = 1.9 Hz), 138.4 (d,  $J^2$  = 33.4 Hz), 132.4 (q,  $J^3$  = 3.1 Hz), 131.6 (d,  $J^3$  = 3.0 Hz), 131.5 (d,  $J^3$  = 3.0 Hz), 130.9, 129.40, 129.35, 128.2, 127.8, 126.7, 117.3 (d,  $J^3$  = 1.1 Hz), 112.2 (d,  $J^2$  = 41.4 Hz), 112.1, 106.7 (d,  $J^3$  = 1.9 Hz), 62.5, 51.6, 13.9 ppm; **HRMS (ESI)**: calcd for  $\text{C}_{25}\text{H}_{20}\text{F}_2\text{O}_4\text{Na}$ :  $[\text{M}+\text{Na}]^+$  445.1222, found 445.1221.

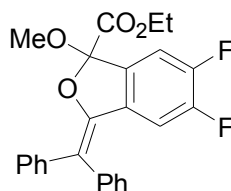

**4b**

Compound **4c**: Colorless oil; **IR** (film)  $\nu_{\text{max}}$  3055, 2977, 2938, 1751, 1493, 1264, 1040, 767, 702  $\text{cm}^{-1}$ ;  $^1\text{H}$  NMR (400 MHz,  $\text{CDCl}_3$ , 25 °C, tetramethylsilane):  $\delta$  = 7.65 (d,  $J$  = 7.6 Hz, 2H), 7.47–7.45 (m, 3H), 7.35–7.26 (m, 5H), 7.16 (t,  $J$  = 7.2 Hz, 1H), 5.76 (s, 1H), 4.35–4.22 (m, 2H), 3.23 (s, 3H), 2.22 (s, 3H), 1.96 (s, 3H), 1.32 ppm (t,  $J$  = 7.2 Hz, 3H);  $^{13}\text{C}$  NMR (100 MHz,  $\text{CDCl}_3$ , 25 °C, tetramethylsilane):  $\delta$  = 167.5, 149.8, 139.4, 139.3,

139.1, 138.3, 134.5, 133.3, 131.5, 129.6, 129.2, 127.9, 127.7, 126.2, 124.7, 123.7, 115.4, 107.6, 62.3, 51.5, 20.4, 20.2, 14.2 ppm; **HRMS (ESI)**: calcd for  $C_{27}H_{26}O_4Na$ :  $[M+Na]^+$  437.1723, found 437.1720.

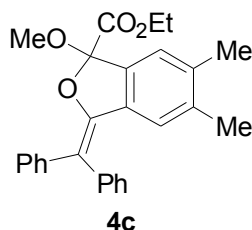

Compound **4d**: Colorless oil; **IR** (film)  $\nu_{max}$  3054, 2939, 2841, 1751, 1442, 1261, 1040, 880, 732, 702  $cm^{-1}$ ;  **$^1H$  NMR** (400 MHz,  $CDCl_3$ , 25 °C, tetramethylsilane):  $\delta$  = 7.63 (d,  $J$  = 7.2 Hz, 2H), 7.46–7.44 (m, 3H), 7.35–7.27 (m, 5H), 7.18–7.16 (m, 1H), 5.85 (s, 1H), 4.31 (q,  $J_1$  = 7.2 Hz,  $J_2$  = 14.4 Hz, 2H), 3.29 (s, 3H), 2.85 (t,  $J$  = 7.2 Hz, 2H), 2.61 (t,  $J$  = 7.2 Hz, 2H), 2.02–1.98 (m, 2H), 1.33 ppm (t,  $J$  = 6.8 Hz, 3H);  **$^{13}C$  NMR** (100 MHz,  $CDCl_3$ , 25 °C, tetramethylsilane):  $\delta$  = 167.4, 149.6, 147.0, 146.0, 139.4, 139.2, 135.2, 133.6, 131.3, 129.4, 129.0, 127.6, 127.6, 126.0, 119.2, 118.6, 115.2, 107.4, 62.1, 51.3, 32.5, 32.4, 25.6, 14.0 ppm; **HRMS (ESI)**: calcd for  $C_{28}H_{26}O_4Na$ :  $[M+Na]^+$  449.1723, found 449.1709.

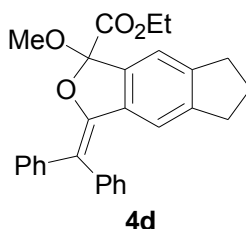

Compound **4e**: White solid; m.p. 140–143 °C; **IR** (film)  $\nu_{max}$  3052, 2973, 2934, 1748, 1471, 1277, 1036, 866, 764, 701  $cm^{-1}$ ;  **$^1H$  NMR** (400 MHz,  $CDCl_3$ , 25 °C, tetramethylsilane):  $\delta$  = 7.61 (d,  $J$  = 7.6 Hz, 2H), 7.47–7.44 (m, 3H), 7.34–7.25 (m, 4H), 7.17 (t,  $J$  = 7.2 Hz, 1H), 6.91 (s, 1H), 5.92 (d,  $J$  = 4.0 Hz, 2H), 5.39 (s, 1H), 4.35–4.25 (m, 2H), 3.29 (s, 3H), 1.34 ppm (t,  $J$  = 7.2 Hz, 3H);  **$^{13}C$  NMR** (100 MHz,  $CDCl_3$ , 25 °C, tetramethylsilane):  $\delta$  = 167.1, 149.6, 149.1, 148.8, 139.2, 138.9, 131.3, 130.9, 129.6, 129.4, 129.2, 127.9, 127.8, 126.2, 115.0, 107.0, 103.4, 103.0, 101.9, 62.3, 51.3, 14.1 ppm; **HRMS (ESI)**: calcd for  $C_{26}H_{22}O_6Na$ :  $[M+Na]^+$  453.1309, found 453.1307.

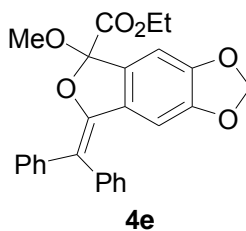

Compound **4f**: White solid; m.p. 152–154 °C; **IR** (film)  $\nu_{max}$  3055, 2978, 2930, 1746, 1463, 1262, 1045, 858, 763, 699  $cm^{-1}$ ;  **$^1H$  NMR** (400 MHz,  $CDCl_3$ , 25 °C, tetramethylsilane):  $\delta$  = 7.70 (d,  $J$  = 8.4 Hz, 2H), 7.58–7.46 (m, 5H), 7.41 (d,  $J$  = 6.8 Hz, 2H), 7.36–7.29 (m, 5H), 7.23–7.20 (m, 3H), 6.21 (s, 1H), 4.33 (q,  $J$  = 7.6 Hz, 2H), 3.34 (s, 3H), 1.34 ppm (t,  $J$  = 7.2 Hz, 3H);  **$^{13}C$  NMR** (100 MHz,  $CDCl_3$ , 25 °C, tetramethylsilane):  $\delta$  = 167.1, 149.3, 142.9, 139.9, 139.0, 138.9, 136.0, 135.3, 131.4, 129.5, 129.3, 128.7, 127.9, 127.7, 127.7, 126.9, 126.5, 123.5, 122.4, 116.7, 107.5, 62.4, 51.6, 14.1 ppm; **HRMS (ESI)**: calcd for

$C_{31}H_{26}O_4Na$ :  $[M+Na]^+$  485.1723, found 485.1728.

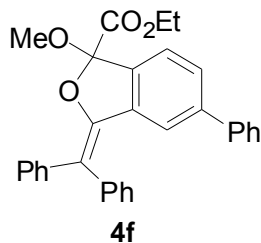

Compound **4g**: White solid; m.p. 158–160 °C; **IR** (film)  $\nu_{max}$  3053, 2978, 2932, 1745, 1468, 1265, 1044, 860, 764, 700  $cm^{-1}$ ;  **$^1H$  NMR** (400 MHz,  $CDCl_3$ , 25 °C, tetramethylsilane):  $\delta$  = 7.75 (d,  $J$  = 1.2 Hz, 1H), 7.67 (d,  $J$  = 8.8 Hz, 2H), 7.55–7.48 (m, 5H), 7.41–7.30 (m, 8H), 7.21–7.20 (m, 1H), 6.12 (d,  $J$  = 8.8 Hz, 1H), 4.33 (q,  $J$  = 7.2 Hz, 2H), 3.35 (s, 3H), 1.33 (t,  $J$  = 7.2 Hz, 3H);  **$^{13}C$  NMR** (100 MHz,  $CDCl_3$ , 25 °C, tetramethylsilane):  $\delta$  = 167.2, 149.2, 141.9, 139.7, 139.2, 139.0, 137.4, 134.1, 131.4, 129.6, 129.2, 128.9, 127.9, 127.9, 127.0, 126.5, 124.0, 121.5, 116.7, 107.5, 62.4, 51.7, 14.1 ppm; **HRMS (ESI)**: calcd for  $C_{31}H_{26}O_4Na$ :  $[M+Na]^+$  485.1723, found 485.1726.

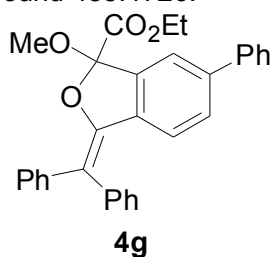

Compound **4h**: Colorless oil; **IR** (film)  $\nu_{max}$  3054, 2968, 2936, 1751, 1464, 1252, 1126, 1050, 763, 698  $cm^{-1}$ ;  **$^1H$  NMR** (400 MHz,  $CDCl_3$ , 25 °C, tetramethylsilane):  $\delta$  = 7.78 (d,  $J$  = 8.4 Hz, 1H), 7.62–7.49 (m, 4H), 7.42–7.34 (m, 3H), 7.25–7.23 (m, 1H), 4.30–4.20 (m, 2H), 3.16 (s, 3H), 2.86 (q,  $J$  = 7.6 Hz, 2H), 1.28 (t,  $J$  = 7.2 Hz, 3H), 1.19 ppm (t,  $J$  = 7.6 Hz, 3H);  **$^{13}C$  NMR** (100 MHz,  $CDCl_3$ , 25 °C, tetramethylsilane):  $\delta$  = 167.3, 147.8, 139.9, 136.9, 134.5, 130.6, 128.8, 128.4, 127.8, 126.3, 123.6, 123.1, 118.0, 106.3, 62.0, 51.2, 24.5, 13.9, 13.4 ppm; **HRMS (ESI)**: calcd for  $C_{21}H_{22}O_4Na$ :  $[M+Na]^+$  361.1410, found 361.1422.

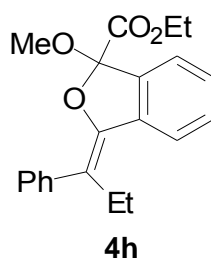

Compound **4i**: Colorless oil; **IR** (film)  $\nu_{max}$  3053, 2980, 2937, 1751, 1466, 1249, 1124, 1045, 763, 698  $cm^{-1}$ ;  **$^1H$  NMR** (400 MHz,  $CDCl_3$ , 25 °C, tetramethylsilane):  $\delta$  = 7.81 (d,  $J$  = 8.0 Hz, 1H), 7.68 (d,  $J$  = 7.2 Hz, 2H), 7.58–7.49 (m, 4H), 7.42–7.34 (m, 3H), 7.25–7.22 (m, 1H), 4.27 (q,  $J$  = 6.8 Hz, 2H), 3.16 (s, 3H), 2.43 (s, 3H), 1.28 ppm (t,  $J$  = 7.2 Hz, 3H);  **$^{13}C$  NMR** (100 MHz,  $CDCl_3$ , 25 °C, tetramethylsilane):  $\delta$  = 167.4, 147.9, 141.2, 136.9, 135.2, 130.5, 128.6, 128.4, 127.8, 126.3, 123.6, 123.6, 110.5, 106.7, 62.1, 51.2, 17.9, 14.0 ppm; **HRMS (ESI)**: calcd for  $C_{20}H_{20}O_4Na$ :  $[M+Na]^+$  347.1254, found 347.1247.



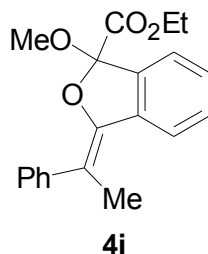

Compound **5**: White solid; m.p. 136–138 °C; **IR** (KBr)  $\nu_{\max}$  3051, 2951, 2934, 1749, 1639, 1469, 1253, 1050, 763, 707, 633  $\text{cm}^{-1}$ ; **<sup>1</sup>H NMR** (400 MHz,  $\text{CDCl}_3$ , 25 °C, tetramethylsilane):  $\delta$  = 7.63 (d,  $J$  = 7.6 Hz, 2H), 7.51–7.45 (m, 4H), 7.36–7.25 (m, 5H), 7.18 (t,  $J$  = 7.2 Hz, 1H), 7.07 (t,  $J$  = 8.0 Hz, 1H), 6.08 (d,  $J$  = 8.0 Hz, 1H), 3.82 (s, 3H), 3.29 ppm (s, 3H); **<sup>13</sup>C NMR** (100 MHz,  $\text{CDCl}_3$ , 25 °C, tetramethylsilane):  $\delta$  = 167.7, 149.3, 139.1, 138.9, 136.4, 135.2, 131.3, 130.2, 129.6, 129.2, 128.8, 127.9, 126.5, 123.8, 123.2, 116.8, 107.5, 53.2, 51.6 ppm; **HRMS (ESI)**: calcd for  $\text{C}_{24}\text{H}_{20}\text{O}_4\text{Na}$ :  $[\text{M}+\text{Na}]^+$  395.1254, found 395.1252.

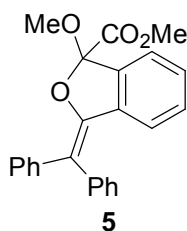

Compound **6a**: Colorless oil; **IR** (film)  $\nu_{\max}$  3055, 2935, 2857, 1748, 1628, 1466, 1249, 762, 702  $\text{cm}^{-1}$ ; **<sup>1</sup>H NMR** (400 MHz,  $\text{CDCl}_3$ , 25 °C, tetramethylsilane):  $\delta$  = 6.03 (d,  $J$  = 8.4 Hz, 1H), 4.26 (q,  $J_1$  = 7.2 Hz,  $J_2$  = 2.8 Hz, 2H), 3.57–3.51 (m, 1H), 1.97 (d,  $J$  = 10.8 Hz, 1H), 1.77–1.61 (m, 3H), 1.47–1.42 (m, 3H), 1.29 (t,  $J$  = 7.2 Hz, 3H), 1.25–1.11 ppm (m, 3H); **<sup>13</sup>C NMR** (100 MHz,  $\text{CDCl}_3$ , 25 °C, tetramethylsilane):  $\delta$  = 167.7, 149.2, 139.3, 139.1, 138.0, 135.1, 131.4, 129.8, 129.4, 129.2, 128.5, 127.7, 126.2, 123.6, 123.5, 116.3, 107.7, 74.9, 62.0, 33.9, 33.8, 25.3, 24.5, 24.3, 14.0 ppm; **HRMS (ESI)**: calcd for  $\text{C}_{30}\text{H}_{30}\text{O}_4\text{Na}$ :  $[\text{M}+\text{Na}]^+$  477.2036, found 477.2050.

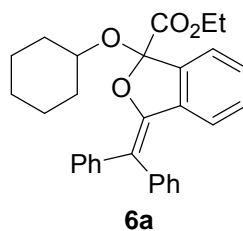

Compound **6b**: Colorless oil; **IR** (film)  $\nu_{\max}$  3057, 2983, 1753, 1467, 1285, 1166, 1053, 762, 701  $\text{cm}^{-1}$ ; **<sup>1</sup>H NMR** (400 MHz,  $\text{CDCl}_3$ , 25 °C, tetramethylsilane):  $\delta$  = 7.60–7.55 (m, 3H), 7.49–7.46 (m, 3H), 7.36–7.28 (m, 5H), 7.25–7.21 (m, 1H), 7.12 (t,  $J$  = 7.6 Hz, 1H), 6.11 (d,  $J$  = 8.0 Hz, 1H), 4.31 (q,  $J$  = 7.2 Hz, 2H), 3.98–3.93 (m, 1H), 3.77–3.74 (m, 1H), 1.32 ppm (t,  $J$  = 7.2 Hz, 3H); **<sup>13</sup>C NMR** (100 MHz,  $\text{CDCl}_3$ , 25 °C, tetramethylsilane):  $\delta$  = 166.0, 148.6, 138.8, 138.5, 135.6, 134.8, 131.1, 130.6, 129.6, 129.2, 129.1, 128.0, 127.9, 126.7, 123.7, 123.5, 123.4 (d,  $J^1$  = 280 Hz), 117.8, 106.6, 62.6, 61.6 (q,  $J^2$  = 36.5 Hz), 14.0 ppm; **HRMS (ESI)**: calcd for  $\text{C}_{26}\text{H}_{21}\text{F}_3\text{O}_4\text{Na}$ :  $[\text{M}+\text{Na}]^+$  477.1284, found 477.1302.

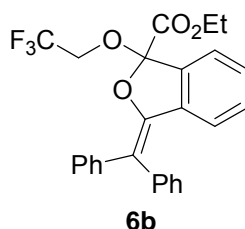

Compound **6c**: Colorless oil; **IR** (film)  $\nu_{\max}$  3640, 3055, 2983, 1748, 1626, 1466, 1250, 1050, 760, 702  $\text{cm}^{-1}$ ;  **$^1\text{H NMR}$**  (400 MHz,  $\text{CDCl}_3$ , 25  $^\circ\text{C}$ , tetramethylsilane):  $\delta$  = 7.62 (d,  $J$  = 7.6 Hz, 2H), 7.54 (d,  $J$  = 7.6 Hz, 1H), 7.46 (d,  $J$  = 6.4 Hz, 3H), 7.35–7.26 (m, 5H), 7.19 (d,  $J$  = 7.2 Hz, 1H), 7.07 (t,  $J$  = 8.0 Hz, 1H), 6.11 (d,  $J$  = 8.0 Hz, 1H), 4.31–4.24 (m, 2H), 3.73 (s, 2H), 3.68–3.56 (m, 2H), 2.63 (br, 1H), 1.30 ppm (t,  $J$  = 7.2 Hz, 3H);  **$^{13}\text{C NMR}$**  (100 MHz,  $\text{CDCl}_3$ , 25  $^\circ\text{C}$ , tetramethylsilane):  $\delta$  = 167.3, 149.0, 139.0, 138.8, 136.7, 134.8, 131.1, 130.1, 129.5, 129.1, 128.8, 127.8, 127.2, 126.4, 123.6, 123.2, 116.9, 107.0, 66.2, 62.3, 61.4, 14.0 ppm; **HRMS (ESI)**: calcd for  $\text{C}_{26}\text{H}_{24}\text{O}_5\text{Na}$ :  $[\text{M}+\text{Na}]^+$  439.1516, found 439.1512.

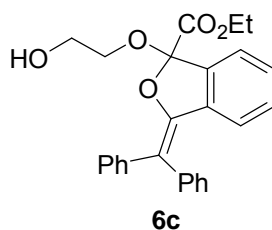

Compound **6d**: Colorless oil; **IR** (film)  $\nu_{\max}$  3058, 3028, 2981, 1740, 1626, 1494, 1233, 1051, 761, 700  $\text{cm}^{-1}$ ;  **$^1\text{H NMR}$**  (400 MHz,  $\text{CDCl}_3$ , 25  $^\circ\text{C}$ , tetramethylsilane):  $\delta$  = 7.66 (d,  $J$  = 7.6 Hz, 2H), 7.60 (d,  $J$  = 7.6 Hz, 1H), 7.47–7.43 (m, 3H), 7.35–7.30 (m, 4H), 7.24–7.15 (m, 7H), 7.00 (t,  $J$  = 7.6 Hz, 1H), 6.06 (d,  $J$  = 7.6 Hz, 1H), 4.21–4.13 (m, 2H), 3.88 (q,  $J_1$  = 12.8 Hz,  $J_2$  = 27.2 Hz, 2H), 1.29 ppm (t,  $J$  = 7.2 Hz, 3H);  **$^{13}\text{C NMR}$**  (100 MHz,  $\text{CDCl}_3$ , 25  $^\circ\text{C}$ , tetramethylsilane):  $\delta$  = 167.4, 149.9, 139.3, 139.0, 139.0, 136.7, 133.8, 131.3, 129.5, 129.4, 129.2, 128.9, 128.4, 127.8, 127.1, 126.3, 123.4, 116.7, 94.5, 62.5, 34.6, 14.0 ppm; **HRMS (ESI)**: calcd for  $\text{C}_{31}\text{H}_{26}\text{O}_3\text{SNa}$ :  $[\text{M}+\text{Na}]^+$  501.1495, found 501.1491.

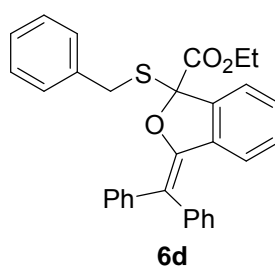

Compound **6e**: Colorless oil; **IR** (film)  $\nu_{\max}$  3058, 3028, 2981, 1740, 1626, 1494, 1233, 1051, 761, 700  $\text{cm}^{-1}$ ;  **$^1\text{H NMR}$**  (400 MHz,  $\text{CDCl}_3$ , 25  $^\circ\text{C}$ , tetramethylsilane):  $\delta$  7.63–7.57 (m, 3H), 7.48–7.44 (m, 3H), 7.37–7.18 (m, 11H), 7.07 (t,  $J$  = 7.8 Hz, 1H), 6.10 (d,  $J$  = 8.0 Hz, 1H), 4.63 (d,  $J$  = 11.2 Hz, 1H), 4.52 (d,  $J$  = 11.6 Hz, 1H), 4.29 (q,  $J$  = 7.2 Hz, 2H), 1.31 (t,  $J$  = 7.2 Hz, 3H);  **$^{13}\text{C NMR}$**  (100 MHz,  $\text{CDCl}_3$ , 25  $^\circ\text{C}$ , tetramethylsilane):  $\delta$  = 167.2, 149.2, 139.2, 139.0, 137.2, 137.1, 135.1, 131.3, 130.1, 129.6, 129.2, 128.8, 128.3, 127.9, 127.8, 127.8, 127.7, 126.4, 123.7, 123.5, 116.8, 107.4, 66.7, 62.3, 14.1 ppm; **HRMS (ESI)**: calcd for  $\text{C}_{31}\text{H}_{26}\text{O}_4\text{Na}$ :  $[\text{M}+\text{Na}]^+$  485.1723, found 501.1730.

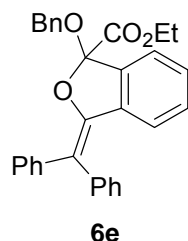

## General procedure for the skeletal rearrangements of thiazepine-fused 7-oxanorbordienes **7a–h**

### Preparation and characterization data for the intermediate **8a**

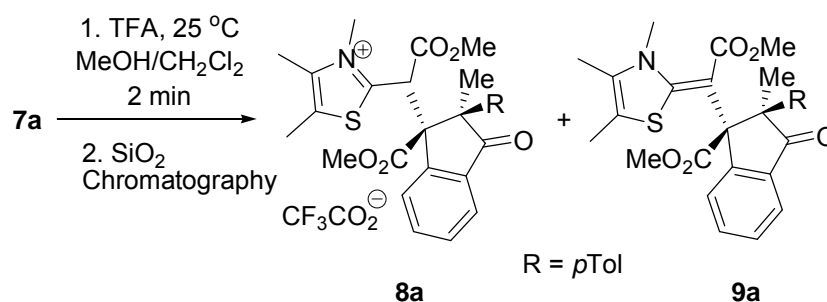

To a solution of **7a** (0.13 mmol) in 2 ml CH<sub>2</sub>Cl<sub>2</sub>/MeOH (5:1) was added TFA (0.13 mmol), and the resulting solution was stirred at RT for 30 min. The solvent was removed under vacuum. The residue was chromatographed on a silica gel column with a CH<sub>2</sub>Cl<sub>2</sub>–MeOH mixture (20:1) to afford a mixture of compounds **8a** and **9a** (c.a. 10:1, monitored by TLC). The mixture was dissolved in 3 ml ethyl acetate/ethyl ether (1:1) with 5 drops of CH<sub>2</sub>Cl<sub>2</sub> and stood at 5 °C overnight, the colorless crystals were collected as a pure form of the intermediate **8a** (52% yield).

Compound **8a**: White solid; m.p. 118–1120 °C; IR (KBr)  $\nu_{\max}$  3072, 2954, 2873, 1754, 1730, 1426, 1336, 1011, 752, 708 cm<sup>-1</sup>; <sup>1</sup>H NMR (500 MHz, d<sub>6</sub>-DMSO, 25 °C, tetramethylsilane):  $\delta$  = 8.04–7.92 (m, 4H), 7.03 (d, *J* = 8.0 Hz, 2H), 6.83 (d, *J* = 8.5 Hz, 2H), 5.94 (s, 1H), 4.27 (s, 3H), 3.69 (s, 3H), 3.08 (s, 3H), 2.43 (s, 3H), 2.30 (s, 3H), 2.21 (s, 3H), 1.50 ppm (s, 3H); <sup>13</sup>C NMR (125 MHz, d<sub>6</sub>-DMSO, 25 °C, tetramethylsilane):  $\delta$  = 205.3, 169.6, 167.3, 161.2, 147.8, 144.5, 140.0, 138.7, 137.4, 137.0, 133.0, 132.6, 131.5, 128.7, 127.8, 124.3, 64.7, 59.9, 54.9, 52.6, 51.7, 39.6, 20.9, 19.0, 12.8, 12.1 ppm; HRMS (ESI): calcd for C<sub>28</sub>H<sub>30</sub>NO<sub>5</sub>S: [M–CF<sub>3</sub>CO<sub>2</sub>]<sup>+</sup> 492.1839, found 492.1834.

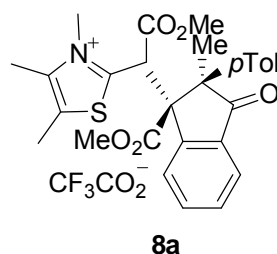

### Rearrangements of **7a–h**

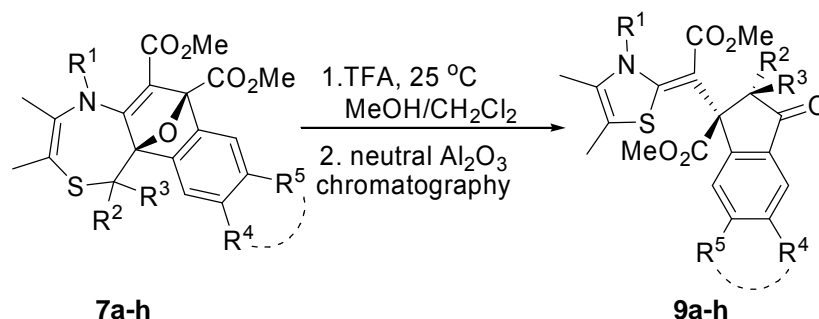

To a solution of **7a–h** (0.13 mmol) in 2 ml CH<sub>2</sub>Cl<sub>2</sub>/MeOH (5:1) was added TFA (0.13 mmol), and the resulting solution was stirred at RT for 30 min. The solvent was removed under vacuum. The residue was chromatographed on a short pad of neutral Al<sub>2</sub>O<sub>3</sub> column with a hexane–ethyl acetate mixture (1:1) to afford the desired products **9a–h**.

### Characterization data for the compounds **9a–h** and **10**

Compound **9a**: Yellow solid; m.p. 205–207 °C; IR (film)  $\nu_{\max}$  3024, 2924, 2854, 1722, 1621, 1475, 1346, 1252, 1033, 755, 734 cm<sup>-1</sup>; <sup>1</sup>H NMR (500 MHz, d<sub>6</sub>-DMSO, 80 °C, tetramethylsilane):  $\delta$  = 7.68 (d, *J* = 7.5 Hz, 1H), 7.62 (d, *J* = 5.5 Hz, 2H), 7.45 (br, 1H), 6.88 (s, 4H), 3.47 (s, 3H), 3.19 (s, 3H), 2.99 (s, 3H), 2.23 (s, 3H), 2.19 (s, 3H), 2.17 (s, 3H), 1.69 ppm (s, 3H); <sup>13</sup>C NMR (125 MHz, d<sub>6</sub>-DMSO, 80 °C, tetramethylsilane):  $\delta$  = 204.8, 171.6, 169.9, 163.1, 152.5, 140.5, 137.9, 135.1, 135.0, 133.4, 128.1, 127.9, 127.7, 127.4, 121.5, 116.4, 78.2, 68.7, 61.1, 51.1, 48.6, 38.9, 20.3, 12.0, 11.1 ppm; HRMS (ESI): calcd for C<sub>28</sub>H<sub>30</sub>NO<sub>5</sub>S: [M+H]<sup>+</sup> 492.1839, found 492.1834.

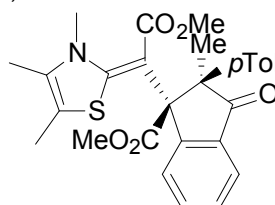

Compound **9b**: Yellow solid; m.p. 192–194 °C; IR (film)  $\nu_{\max}$  3030, 2987, 2942, 1731, 1716, 1614, 1419, 1336, 1224, 1036, 745, 700 cm<sup>-1</sup>; <sup>1</sup>H NMR (500 MHz, CDCl<sub>3</sub>, 25 °C, tetramethylsilane):  $\delta$  = 7.92 (s, 1H), 7.51–7.43 (m, 4H), 7.28 (d, *J* = 7.0 Hz, 2H), 7.16 (t, *J* = 7.5 Hz, 2H), 4.32 (q, *J* = 7.5 Hz, 1H), 3.92 (s, 1H), 3.27 (s, 3H), 3.06 (s, 3H), 2.46 (q, *J* = 7.0 Hz, 1H), 2.20 (s, 3H), 2.07 (s, 3H), 1.67 (s, 1H), 1.35 (t, *J* = 7.0 Hz, 3H), 0.68 ppm (s, 3H); <sup>13</sup>C NMR (100 MHz, CDCl<sub>3</sub>, 25 °C, tetramethylsilane):  $\delta$  = 203.3, 174.1, 166.8, 166.4, 148.1, 136.9, 133.1, 132.3, 132.3, 131.5, 129.4, 128.3, 126.2, 125.7, 124.6, 114.5, 83.4, 70.5, 68.7, 51.9, 49.8, 45.8, 30.6, 13.4, 12.6, 11.7, 8.6 ppm; HRMS (ESI): calcd for C<sub>29</sub>H<sub>32</sub>NO<sub>5</sub>S: [M+H]<sup>+</sup> 506.1996, found 506.1972.

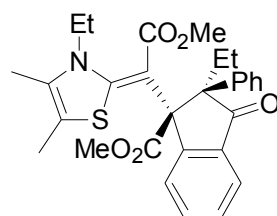

**9b**

Compound **9c**: Yellow solid; m.p.223–225 °C; **IR** (KBr)  $\nu_{\max}$  3068, 2950, 1738, 1723, 1601, 1426, 1229, 1008, 848, 707  $\text{cm}^{-1}$ ;  **$^1\text{H NMR}$**  (500 MHz,  $d_6$ -DMSO, 80 °C, tetramethylsilane):  $\delta$  = 7.70 (d,  $J$  = 8.0 Hz, 1H), 7.62 (s, 2H), 7.46 (s, 1H), 7.29 (d,  $J$  = 8.5 Hz, 2H), 6.96 (d,  $J$  = 7.5 Hz, 2H), 4.30 (q,  $J$  = 7.5 Hz, 1H), 3.95 (q,  $J$  = 7.0 Hz, 1H), 3.18 (s, 3H), 3.03 (s, 3H), 2.27 (s, 3H), 2.18 (s, 3H), 1.71 (s, 3H), 1.31 ppm (t,  $J$  = 7.0 Hz, 3H);  **$^{13}\text{C NMR}$**  (125 MHz,  $d_6$ -DMSO, 80 °C, tetramethylsilane):  $\delta$  = 204.3, 171.7, 171.6, 151.9, 143.0, 135.0, 133.6, 131.1, 130.6, 130.1, 129.7, 128.6, 128.3, 127.9, 122.7, 121.7, 119.5, 68.9, 61.6, 51.2, 48.7, 46.0, 20.9, 13.3, 12.0, 11.3 ppm; **HRMS (ESI)**: calcd for  $\text{C}_{28}\text{H}_{29}\text{BrNO}_5\text{S}$ :  $[\text{M}+\text{H}]^+$  570.0944, found 570.0940.

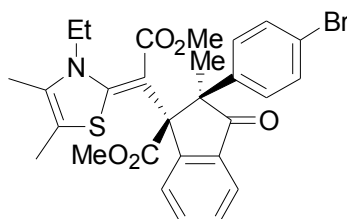

**9c**

Compound **9d**: Yellow solid; m.p.217–220 °C; **IR** (KBr)  $\nu_{\max}$  3061, 2983, 2946, 1747, 1713, 1644, 1433, 1236, 1177, 763, 736  $\text{cm}^{-1}$ ;  **$^1\text{H NMR}$**  (500 MHz,  $d_6$ -DMSO, 25 °C, tetramethylsilane):  $\delta$  = 7.56–7.54 (m, 2H), 7.48–7.35 (m, 4H), 7.08 (s, 2H), 4.15–4.13 (m, 1H), 3.78 (br, 1H), 3.42 (s, 3H), 3.28 (s, 3H), 2.02 (s, 3H), 1.82 (s, 3H), 1.34 (s, 3H), 1.13 ppm (t,  $J$  = 7.5 Hz, 3H);  **$^{13}\text{C NMR}$**  (125 MHz,  $d_6$ -DMSO, 80 °C, tetramethylsilane):  $\delta$  = 206.2, 171.6, 171.1, 137.6, 135.6, 134.6, 132.1, 132.1, 131.8, 131.4, 129.8, 129.2, 129.0, 128.3, 127.9, 127.2, 125.4, 123.3, 121.1, 71.2, 51.4, 49.5, 46.4, 25.6, 18.8, 13.7, 11.9, 11.0 ppm; **HRMS (ESI)**: calcd for  $\text{C}_{28}\text{H}_{29}\text{ClNO}_5\text{S}$ :  $[\text{M}+\text{H}]^+$  526.1449, found 526.1432.

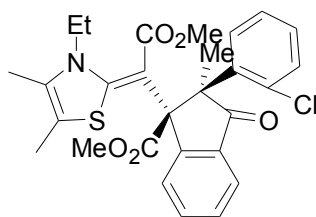

**9d**

Compound **9e**: Yellow solid; m.p.214–216 °C; **IR** (KBr)  $\nu_{\max}$  3060, 2946, 1715, 1618, 1421, 1338, 1225, 1032, 950, 758  $\text{cm}^{-1}$ ;  **$^1\text{H NMR}$**  (500 MHz,  $d_6$ -DMSO, 80 °C, tetramethylsilane):  $\delta$  = 7.67–7.58 (m, 3H), 7.41 (t,  $J$  = 7.0 Hz, 1H), 6.86 (d,  $J$  = 8.0 Hz, 2H), 6.63 (d,  $J$  = 8.5 Hz, 2H), 4.30 (q,  $J$  = 7.0 Hz, 1H), 3.92 (q,  $J$  = 7.0 Hz, 1H), 3.72 (s, 3H), 3.13 (s, 3H), 2.97 (s, 3H), 2.26 (s, 3H), 2.19 (s, 3H), 1.72 (s, 3H), 1.30 ppm (t,  $J$  = 7.0 Hz, 3H);  **$^{13}\text{C NMR}$**  (125 MHz,  $d_6$ -DMSO, 80 °C, tetramethylsilane):  $\delta$  = 205.3, 172.2, 163.1, 158.3, 152.8, 138.8,

136.3, 135.6, 133.8, 130.9, 129.8, 128.9, 128.4, 128.0, 121.7, 114.1, 113.2, 69.4, 61.6, 55.7, 51.6, 49.1, 46.6, 20.2, 13.9, 12.6, 11.9 ppm; **HRMS (ESI)**: calcd for  $C_{29}H_{32}NO_6S$ :  $[M+H]^+$  522.1945, found 522.1929.

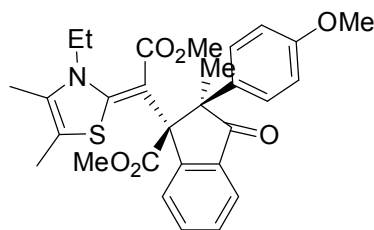

**9e**

Compound **9f**: Yellow solid; m.p.223–225 °C; **IR** (film)  $\nu_{max}$  3032, 2945, 1735, 1715, 1615, 1427, 1379, 1230, 1032, 748, 704  $cm^{-1}$ ;  **$^1H$  NMR** (500 MHz,  $d_6$ -DMSO, 80 °C, tetramethylsilane):  $\delta$  = 7.40 (s, 1H), 7.18 (d,  $J$  = 6.0 Hz, 2H), 7.07–6.97 (m, 4H), 4.05 (t,  $J$  = 7.0 Hz, 1H), 3.85 (t,  $J$  = 7.0 Hz, 1H), 3.08 (s, 3H), 3.01 (s, 3H), 2.30–2.28 (m, 1H), 2.27 (t, 3H,  $J$  = 7.0 Hz), 2.16 (s, 3H), 2.13 (s, 3H), 1.99 (s, 3H), 1.81 (br, 1H), 1.22 (t,  $J$  = 7.0 Hz, 3H), 0.60 ppm (s, 3H);  **$^{13}C$  NMR** (125 MHz,  $d_6$ -DMSO, 80 °C, tetramethylsilane):  $\delta$  = 203.3, 172.6, 164.909, 142.0, 138.5, 136.8, 135.1, 133.9, 131.0, 129.7, 129.3, 128.6, 126.6, 126.0, 125.5, 123.2, 122.5, 70.1, 66.9, 51.3, 49.0, 45.9, 27.4, 20.3, 19.2, 13.0, 12.0, 11.1, 9.0 ppm; **HRMS (ESI)**: calcd for  $C_{31}H_{36}NO_5S$ :  $[M+H]^+$  534.2309, found 534.2294.

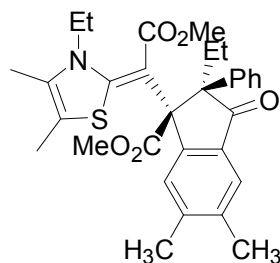

**9f**

Compound **9g**: Yellow solid; m.p.188–190 °C; **IR** (KBr)  $\nu_{max}$  3055, 2946, 1749, 1733, 1643, 1492, 1350, 1212, 972, 762, 704  $cm^{-1}$ ;  **$^1H$  NMR** (500 MHz,  $d_6$ -DMSO, 80 °C, tetramethylsilane):  $\delta$  = 8.08 (s, 1H), 7.30–7.10 (m, 9H), 6.66 (d,  $J$  = 6.5 Hz, 1H), 3.59 (s, 3H), 3.55 (s, 3H), 3.30 s, 3H), 2.06 (s, 3H), 2.04 ppm (s, 3H);  **$^{13}C$  NMR** (125 MHz,  $d_6$ -DMSO, 80 °C, tetramethylsilane):  $\delta$  = 171.2, 168.3, 165.1, 150.9, 141.9, 140.2, 139.6, 135.3, 134.3, 131.3, 130.6, 129.3, 129.0, 128.4, 127.5, 127.1, 126.2, 125.6, 123.6, 122.7, 116.5, 79.6, 69.0, 52.4, 49.6, 38.9, 11.6, 11.0 ppm; **HRMS (ESI)**: calcd for  $C_{32}H_{30}NO_5S$ :  $[M+H]^+$  540.1839, found 540.1836.

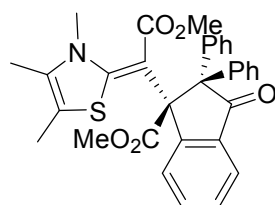

**9g**

Compound **9h**: Yellow solid; m.p.238–240 °C; **IR** (film)  $\nu_{max}$  3053, 2972, 2943, 1753, 1648, 1521, 1312, 1163, 941, 766  $cm^{-1}$ ;  **$^1H$  NMR** (500 MHz,  $d_6$ -DMSO, 80 °C, tetramethylsilane):  $\delta$  = 7.16 (d,  $J$  = 7.0 Hz, 2H), 7.07–7.01 (m, 4H), 6.60 (s, 1H), 6.05 (d,  $J$  = 14.0 Hz, 2H),

4.04 (q,  $J = 7.0$  Hz, 1H), 3.90–3.84 (m, 1H), 3.13 (s, 3H), 3.03 (s, 3H), 2.28 (q,  $J = 7.0$  Hz, 1H), 2.13 (s, 4H), 2.01 (s, 3H), 1.19 (t,  $J = 7.0$  Hz), 0.62 ppm (s, 3H);  $^{13}\text{C}$  NMR (125 MHz,  $d_6$ -DMSO, 80 °C, tetramethylsilane):  $\delta = 202.3, 172.3, 171.6, 152.3, 148.5, 147.0, 138.8, 134.1, 131.8, 130.9, 129.3, 128.4, 126.7, 126.1, 125.6, 107.5, 102.3, 101.1, 70.0, 66.8, 51.4, 49.1, 45.9, 28.9, 13.1, 12.1, 11.2, 9.1$  ppm; **HRMS (ESI)**: calcd for  $\text{C}_{30}\text{H}_{32}\text{NO}_7\text{S}$ :  $[\text{M}+\text{H}]^+$  550.1894, found 550.1882.

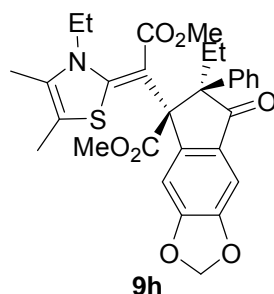

Compound **10**: White solid; m.p. 112–114 °C; **IR** (KBr)  $\nu_{\text{max}}$  3054, 2967, 2907, 1743, 1650, 1502, 1479, 1374, 1105, 868, 770, 706  $\text{cm}^{-1}$ ;  $^1\text{H}$  NMR (400 MHz,  $d_6$ -Acetone, 25 °C, tetramethylsilane):  $\delta = 7.61$  (d,  $J = 8.0$  Hz, 2H), 7.35 (t,  $J = 8.0$  Hz, 2H), 7.28 (s, 1H), 7.23–7.19 (m, 1H), 6.96 (s, 1H), 6.17 (d,  $J = 4.8$  Hz, 2H), 3.74 (s, 3H), 3.12 (s, 3H), 2.82–2.79 (m, 2H), 1.15 ppm (t,  $J = 7.6$  Hz, 3H);  $^{13}\text{C}$  NMR (100 MHz,  $d_6$ -Acetone, 25 °C, tetramethylsilane):  $\delta = 167.3, 150.7, 148.8, 147.7, 140.3, 131.5, 128.8, 128.3, 127.7, 126.2, 115.8, 106.1, 103.4, 102.7, 102.6, 52.1, 50.3, 24.0, 13.0$  ppm; **HRMS (ESI)**: calcd for  $\text{C}_{21}\text{H}_{20}\text{O}_6\text{Na}$ :  $[\text{M}+\text{Na}]^+$  391.1152, found 391.1144.

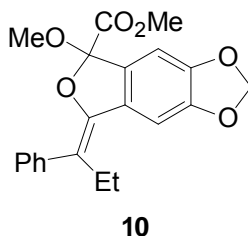

### Characterization data for the compound **[D<sub>1</sub>11]**

Compound **[D<sub>1</sub>11]**:  $^1\text{H}$  NMR (500 MHz,  $\text{CDCl}_3 + d_4$ -Methanol (2:1), 25 °C, tetramethylsilane):  $\delta = 8.74$  (q,  $J = 8.0$  Hz, 2H), 8.21 (d,  $J = 8.0$  Hz, 1H), 7.78–7.64 (m, 5H), 7.45–7.34 (m, 5H), 4.66 (q,  $J = 7.5$  Hz, 1H), 4.42 (q,  $J = 7.5$  Hz, 1H), 3.54 (s, 3H), 2.96 (s, 3H), 2.91 (q,  $J = 7.5$  Hz, 1H), 2.69 (q,  $J = 7.5$  Hz, 1H), 2.40 (s, 3H), 2.27 (s, 3H), 1.47 (t,  $J = 7.5$  Hz, 3H), 1.15 ppm (t,  $J = 7.0$  Hz, 3H);  $^{13}\text{C}$  NMR (125 MHz,  $\text{CDCl}_3 + d_4$ -Methanol (2:1), 25 °C, tetramethylsilane):  $\delta = 169.8, 164.1, 161.8, 159.5$  (d,  $J^2 = 38.8$  Hz), 141.2, 140.3, 148.7, 134.2, 132.8, 132.2, 131.7, 131.0, 130.2, 128.4, 128.3, 128.1, 127.4, 127.0, 126.5, 125.5, 125.4, 124.1, 123.8, 123.0, 122.3, 116.4 (q,  $J^1 = 291$  Hz), 88.9, 54.1, 53.2, 46.8, 26.2, 14.0, 12.3, 11.7, 11.5 ppm; **HRMS (ESI)**: calcd for  $\text{C}_{37}\text{H}_{35}\text{DNO}_5\text{S}$ :  $[\text{M}-\text{CF}_3\text{CO}_2]^+$  607.2371, found 607.2348.

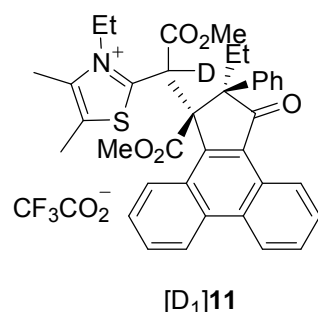

### General procedure for the skeletal rearrangements of thiazepine-fused 7-oxanorborenes **12a–c**

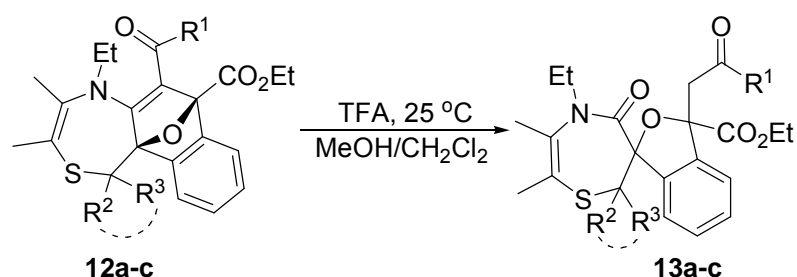

To a solution of **12a–c** (0.13 mmol) in 2 ml CH<sub>2</sub>Cl<sub>2</sub>/MeOH (5:1) was added TFA (0.13 mmol), and the resulting solution was stirred at RT for 12 h. On completion of the reaction, the solvent was removed under vacuum. The residue was chromatographed on a silica gel column with a hexane–ethyl acetate mixture (3:1) to afford the desired products **13a–c**.

### Characterization data for the compounds **13a–c**

Compound **13a**: White solid; m.p.166–168 °C; IR (KBr)  $\nu_{\text{max}}$  3062, 2974, 2930, 1756, 1618, 1462, 1220, 1055, 776, 694 cm<sup>-1</sup>; <sup>1</sup>H NMR (400 MHz, CDCl<sub>3</sub>, 25 °C, tetramethylsilane):  $\delta$  = 7.87 (d,  $J$  = 7.6 Hz, 1H), 7.70 (d,  $J$  = 9.2 Hz, 2H), 7.59 (d,  $J$  = 9.2 Hz, 2H), 7.42–7.34 (m, 3H), 4.30 (q,  $J$  = 7.4 Hz, 2H), 3.68–3.60 (m, 2H), 3.37 (d,  $J$  = 18.0 Hz, 1H), 3.15 (q,  $J$  = 6.8 Hz, 1H), 2.17 (d,  $J$  = 1.2 Hz, 3H), 1.66 (d,  $J$  = 1.2 Hz, 3H), 1.64 (s, 3H), 1.39 (s, 3H), 1.31 (t,  $J$  = 7.0 Hz, 3H), 1.08 ppm (t,  $J$  = 7.4 Hz, 3H); <sup>13</sup>C NMR (100 MHz, CDCl<sub>3</sub>, 25 °C, tetramethylsilane):  $\delta$  = 194.1, 172.7, 170.4, 141.1, 139.8, 137.2, 134.9, 132.0, 129.3, 128.8, 128.7, 127.9, 121.8, 98.4, 87.3, 69.6, 61.4, 50.8, 39.9, 28.7, 27.0, 23.5, 17.5, 14.1, 12.1 ppm; HRMS (ESI): calcd for C<sub>29</sub>H<sub>32</sub>BrNO<sub>5</sub>SNa: [M+Na]<sup>+</sup> 608.1077, found 608.1086.

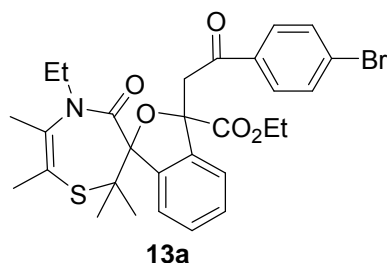

Compound **13b**: White solid; m.p.140–142 °C; IR (KBr)  $\nu_{\text{max}}$  3060, 2977, 2926, 1753,



1610, 1468, 1215, 1054, 775, 698  $\text{cm}^{-1}$ ;  $^1\text{H NMR}$  (500 MHz,  $\text{CDCl}_3$ , 25  $^\circ\text{C}$ , tetramethylsilane):  $\delta$  = 7.91 (d,  $J$  = 7.5 Hz, 1H), 7.66 (d,  $J$  = 8.5 Hz, 2H), 7.56 (d,  $J$  = 8.5 Hz, 2H), 7.37–7.31 (m, 3H), 4.28–3.24 (m, 2H), 3.63–3.54 (m, 2H), 3.67 (d,  $J$  = 17.5 Hz, 1H), 3.14 (q,  $J$  = 7.0 Hz, 1H), 2.49 (t,  $J$  = 10.5 Hz, 2H), 2.11 (s, 3H), 1.97–1.84 (m, 2H), 1.65 (s, 3H), 1.57–1.48 (m, 4H), 1.28 (t,  $J$  = 7.3 Hz, 3H), 1.06 (t,  $J$  = 7.0 Hz, 3H), 0.93–0.90 ppm (m, 2H);  $^{13}\text{C NMR}$  (125 MHz,  $\text{CDCl}_3$ , 25  $^\circ\text{C}$ , tetramethylsilane):  $\delta$  = 194.7, 173.4, 170.7, 141.9, 140.2, 137.4, 135.3, 132.3, 130.0, 129.6, 129.03, 129.00, 127.9, 122.1, 121.6, 99.9, 87.5, 76.5, 61.7, 51.2, 40.1, 35.8, 32.5, 25.6, 24.0, 22.6, 21.7, 17.6, 14.3, 12.4 ppm; **HRMS (ESI)**: calcd for  $\text{C}_{32}\text{H}_{36}\text{BrNO}_5\text{SNa}$ :  $[\text{M}+\text{Na}]^+$  648.1390, found 648.1384.

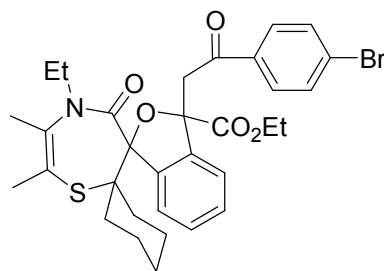

**13b**

Compound **13c**: White solid; m.p. 160–162  $^\circ\text{C}$ ; **IR** (KBr)  $\nu_{\text{max}}$  3057, 2972, 2920, 1755, 1615, 1464, 1218, 1056, 776, 696  $\text{cm}^{-1}$ ;  $^1\text{H NMR}$  (400 MHz,  $\text{CDCl}_3$ , 25  $^\circ\text{C}$ , tetramethylsilane):  $\delta$  = 7.88–7.83 (m, 1H), 7.71 (d,  $J$  = 7.6 Hz, 2H), 7.41–7.33 (m, 3H), 7.22 (d,  $J$  = 7.2 Hz, 2H), 4.30 (d,  $J$  = 7.2 Hz, 2H), 3.65–3.56 (m, 2H), 3.41 (d,  $J$  = 17.6 Hz, 1H), 3.17 (t,  $J$  = 5.8 Hz, 1H), 2.54 (br, 0.8H), 2.38 (s, 3H), 2.16 (s, 3H), 1.83–1.78 (m, 1.2H), 1.69 (s, 3H), 1.54 (s, 0.8H), 1.37 (s, 2.2H), 1.30 (t,  $J$  = 6.8 Hz, 3H), 1.09–1.03 ppm (m, 6H);  $^{13}\text{C NMR}$  (100 MHz,  $\text{CDCl}_3$ , 25  $^\circ\text{C}$ , tetramethylsilane):  $\delta$  = 190.5, 173.2, 170.5, 144.3, 142.1, 141.3, 140.3, 137.1, 133.9, 129.3, 128.7, 128.0, 127.6, 122.0, 121.1, 99.2, 87.4, 75.1, 74.2, 61.3, 51.0, 39.8, 31.8, 23.7, 21.6, 17.3, 14.1, 12.3, 9.4 ppm; **HRMS (ESI)**: calcd for  $\text{C}_{31}\text{H}_{37}\text{NO}_5\text{SNa}$ :  $[\text{M}+\text{Na}]^+$  558.2285, found 558.2276.

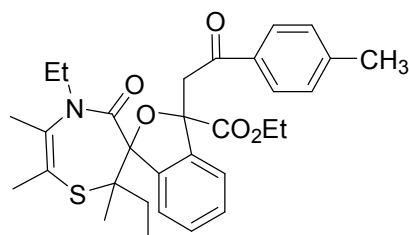

**13c**

## References

- (1) Y. Himeshima, T. Sonoda, H. Kobayashi, *Chem. Lett.* **1983**, 1211–1214.
- (2) D. Pena, D. Perez, E. Guitian, L. Castedo, *J. Am. Chem. Soc.* **1999**, *121*, 5827–5828.
- (3) H. Yoshida, S. Sugiura, A. Kunai, *Org. Lett.* **2002**, *4*, 2767–2769.
- (4) H. Yoshida, J. Ikadai, M. Shudo, J. Ohshita, A. Kunai, *J. Am. Chem. Soc.* **2003**, *125*, 6638–6639.
- (5) Y. Sato, T. Tamura, M. Mori, *Angew. Chem.* **2004**, *116*, 2490–2494; *Angew. Chem. Int. Ed.* **2004**, *43*, 2436–2440.
- (6) Y. K. Ramtohul, A. Chartrand, *Org. Lett.* **2007**, *9*, 1029–1032.
- (7) H. Ding, Y. Zhang, M. Bian, W. Yao, C. Ma, *J. Org. Chem.* **2008**, *73*, 578–584.

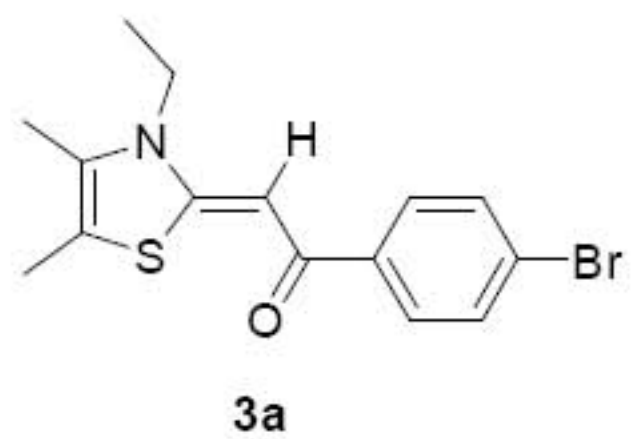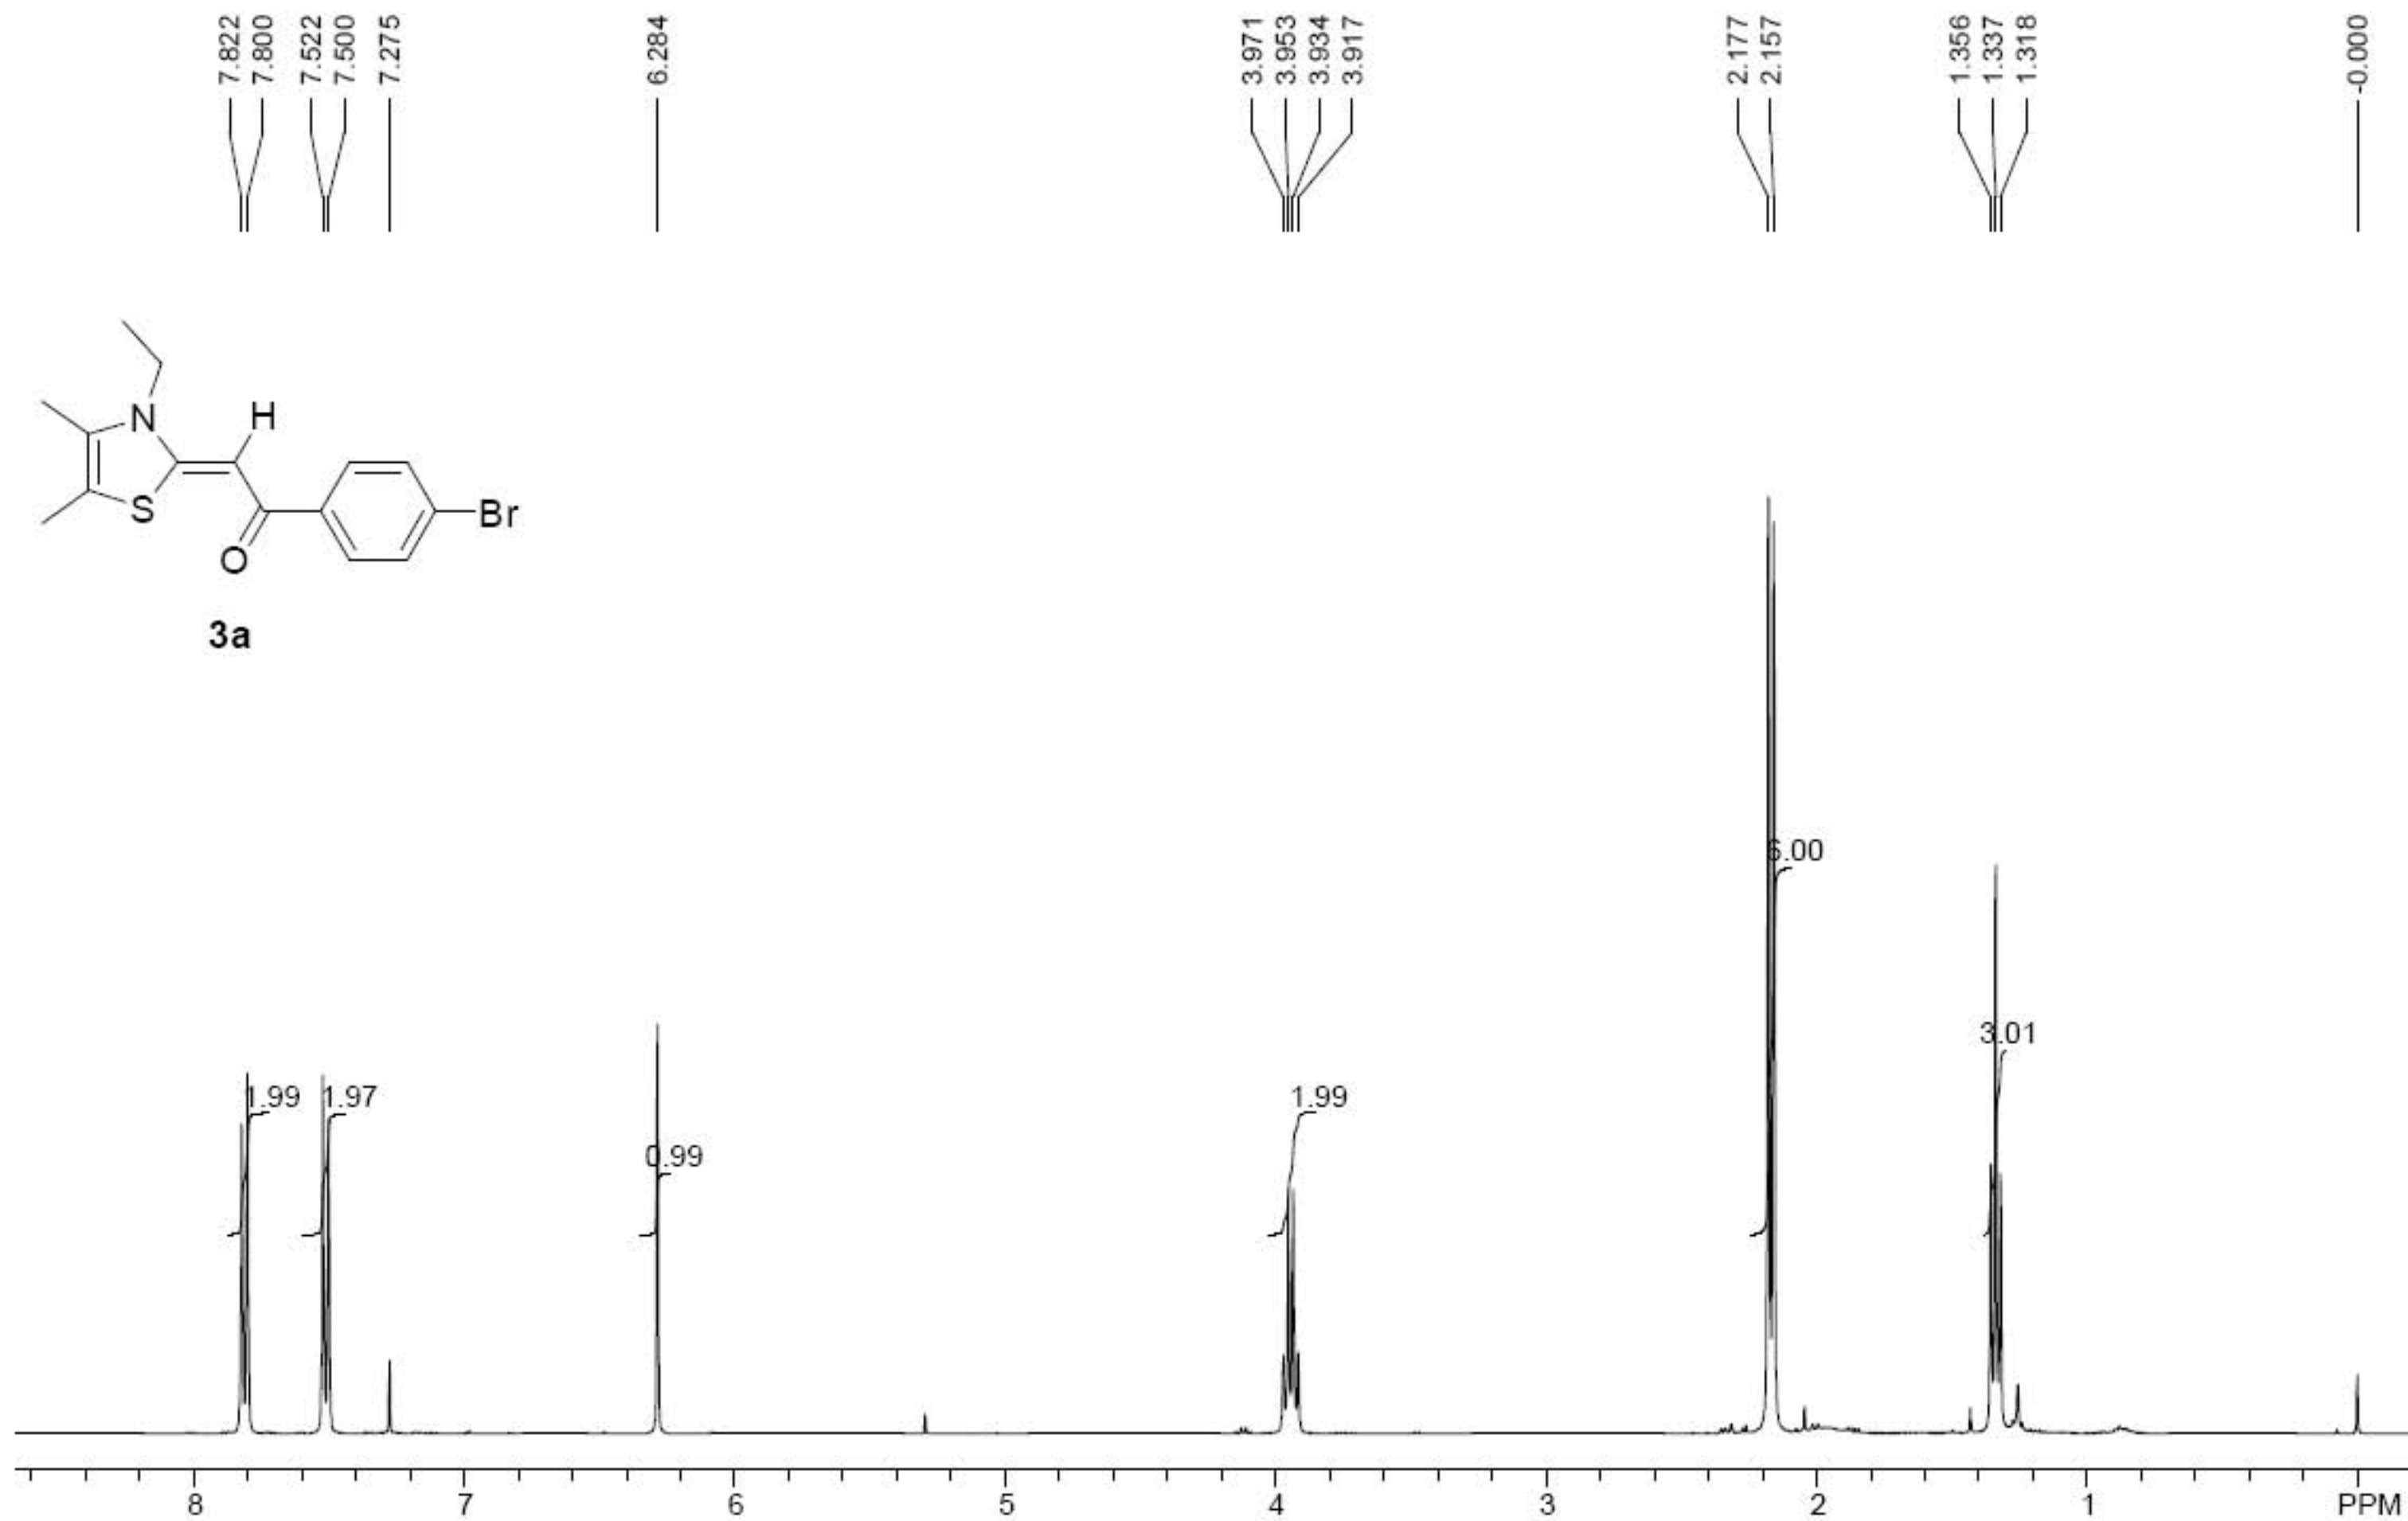

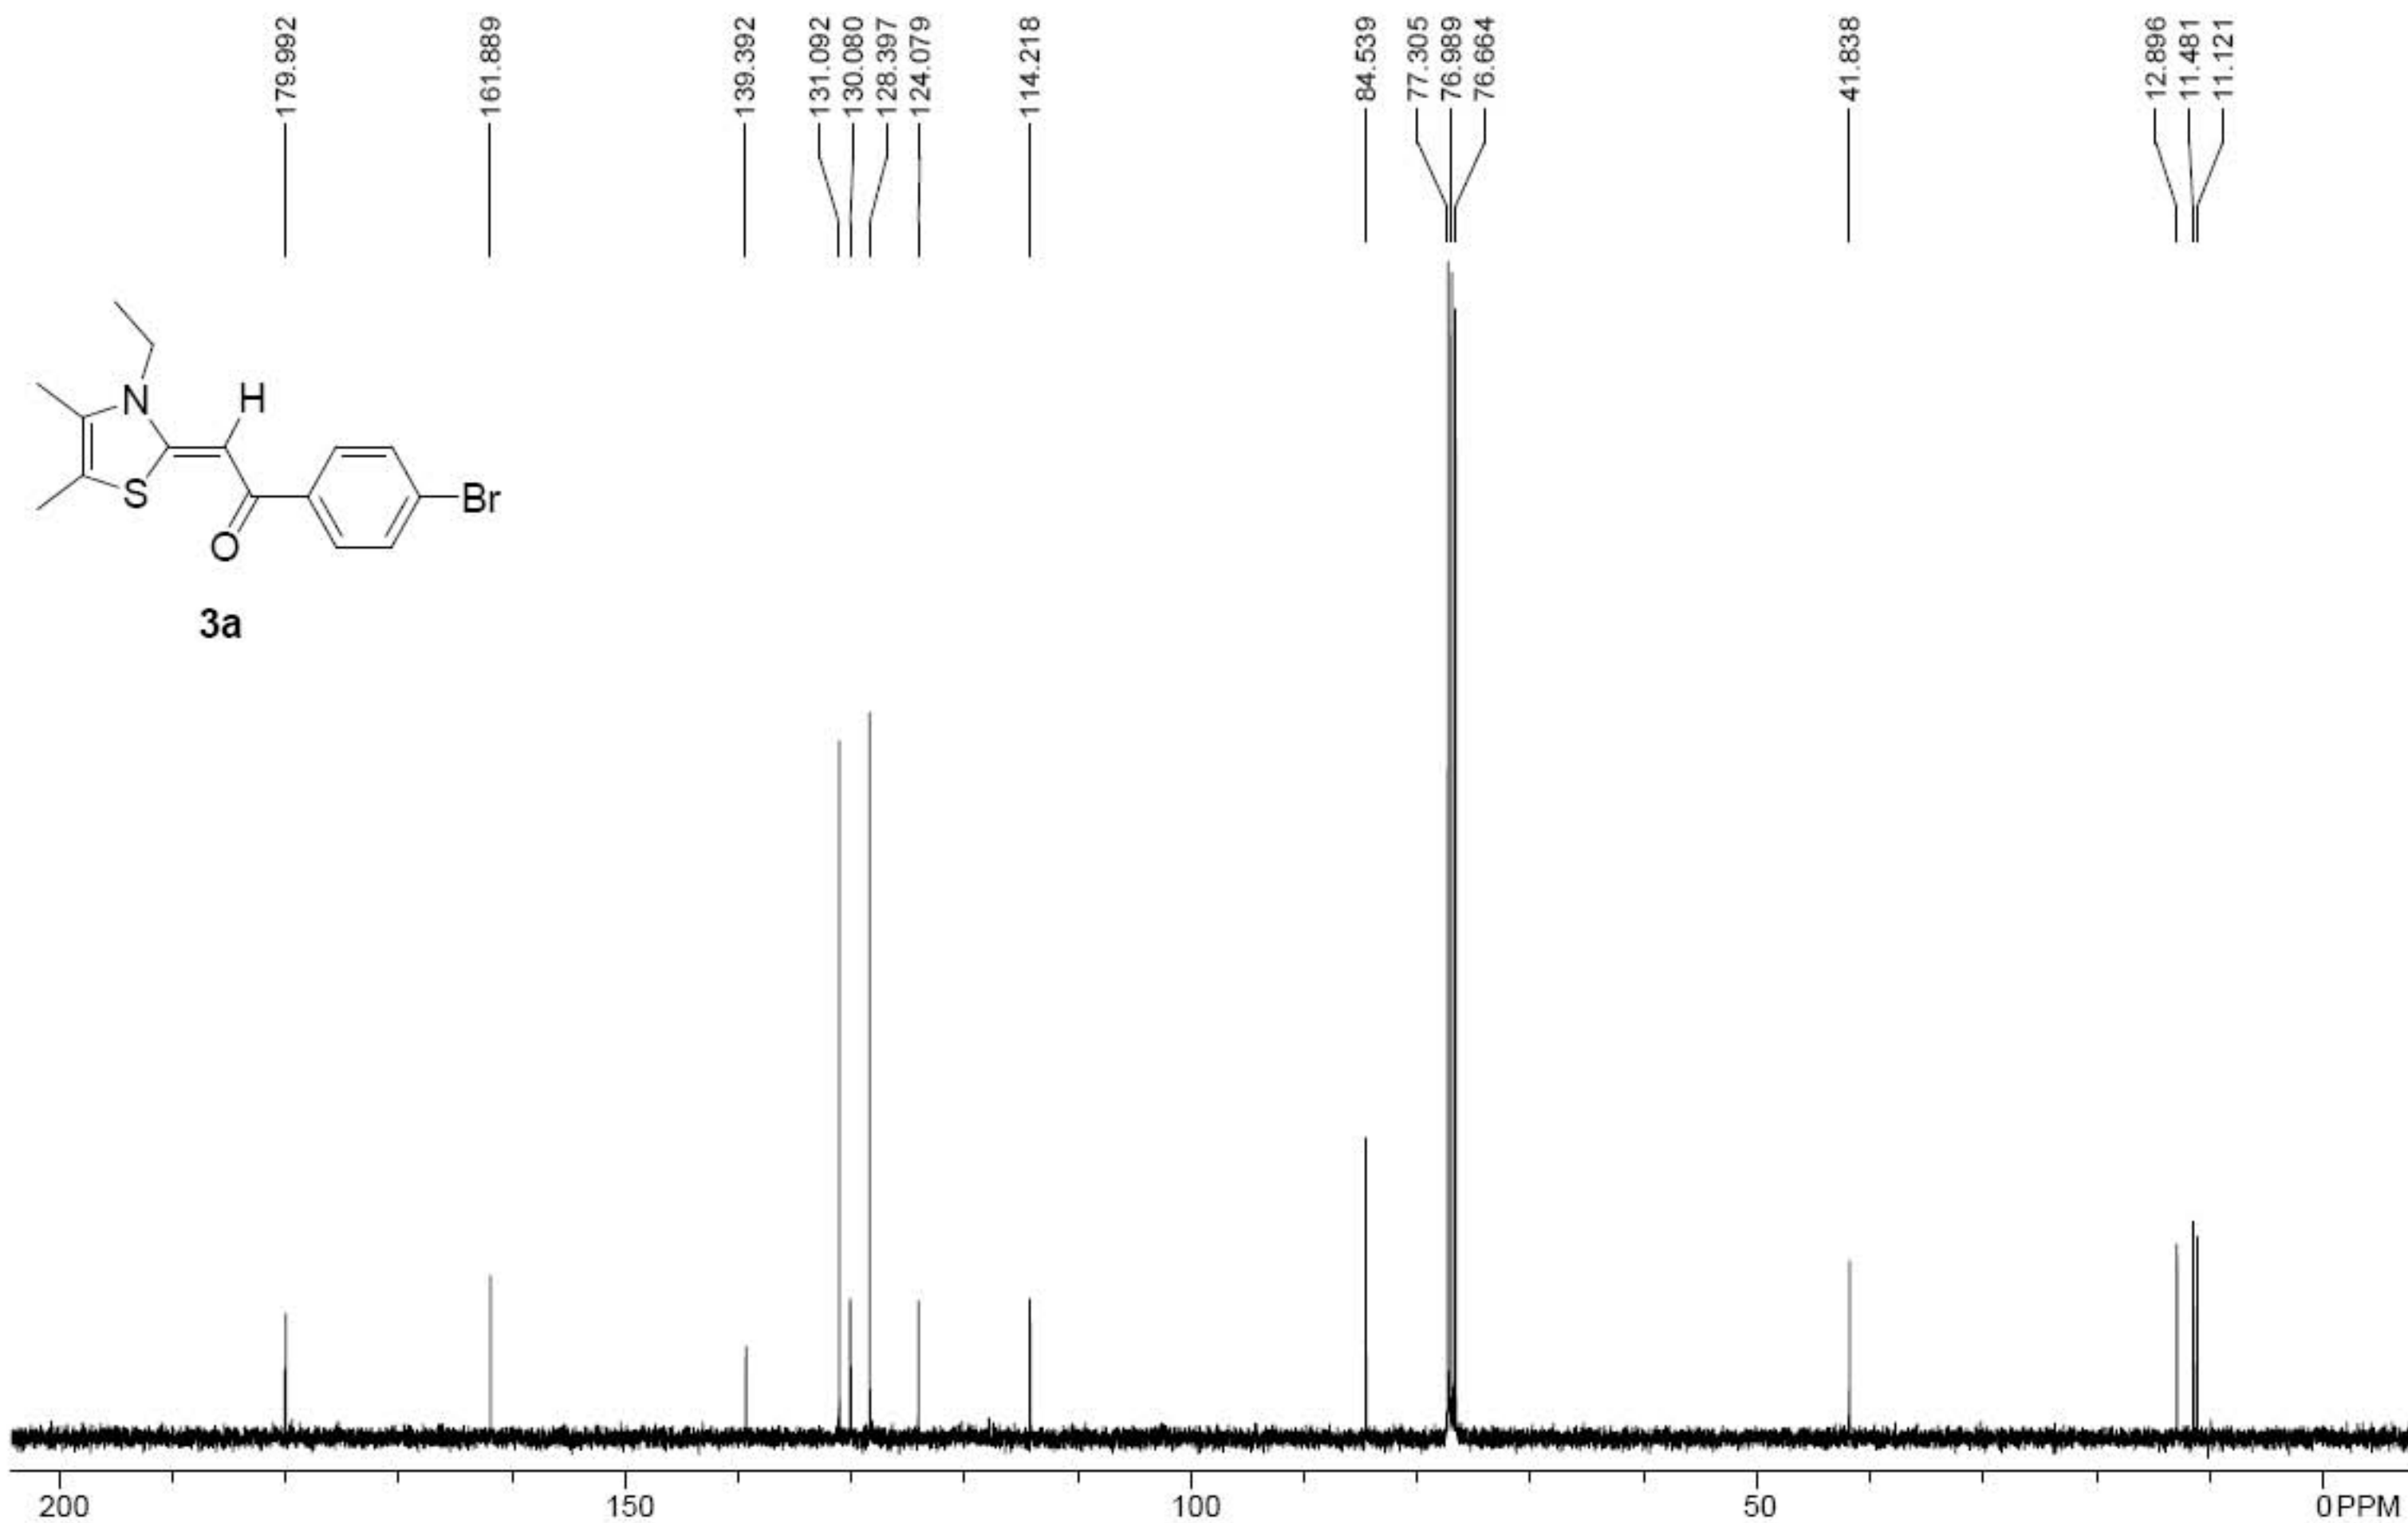

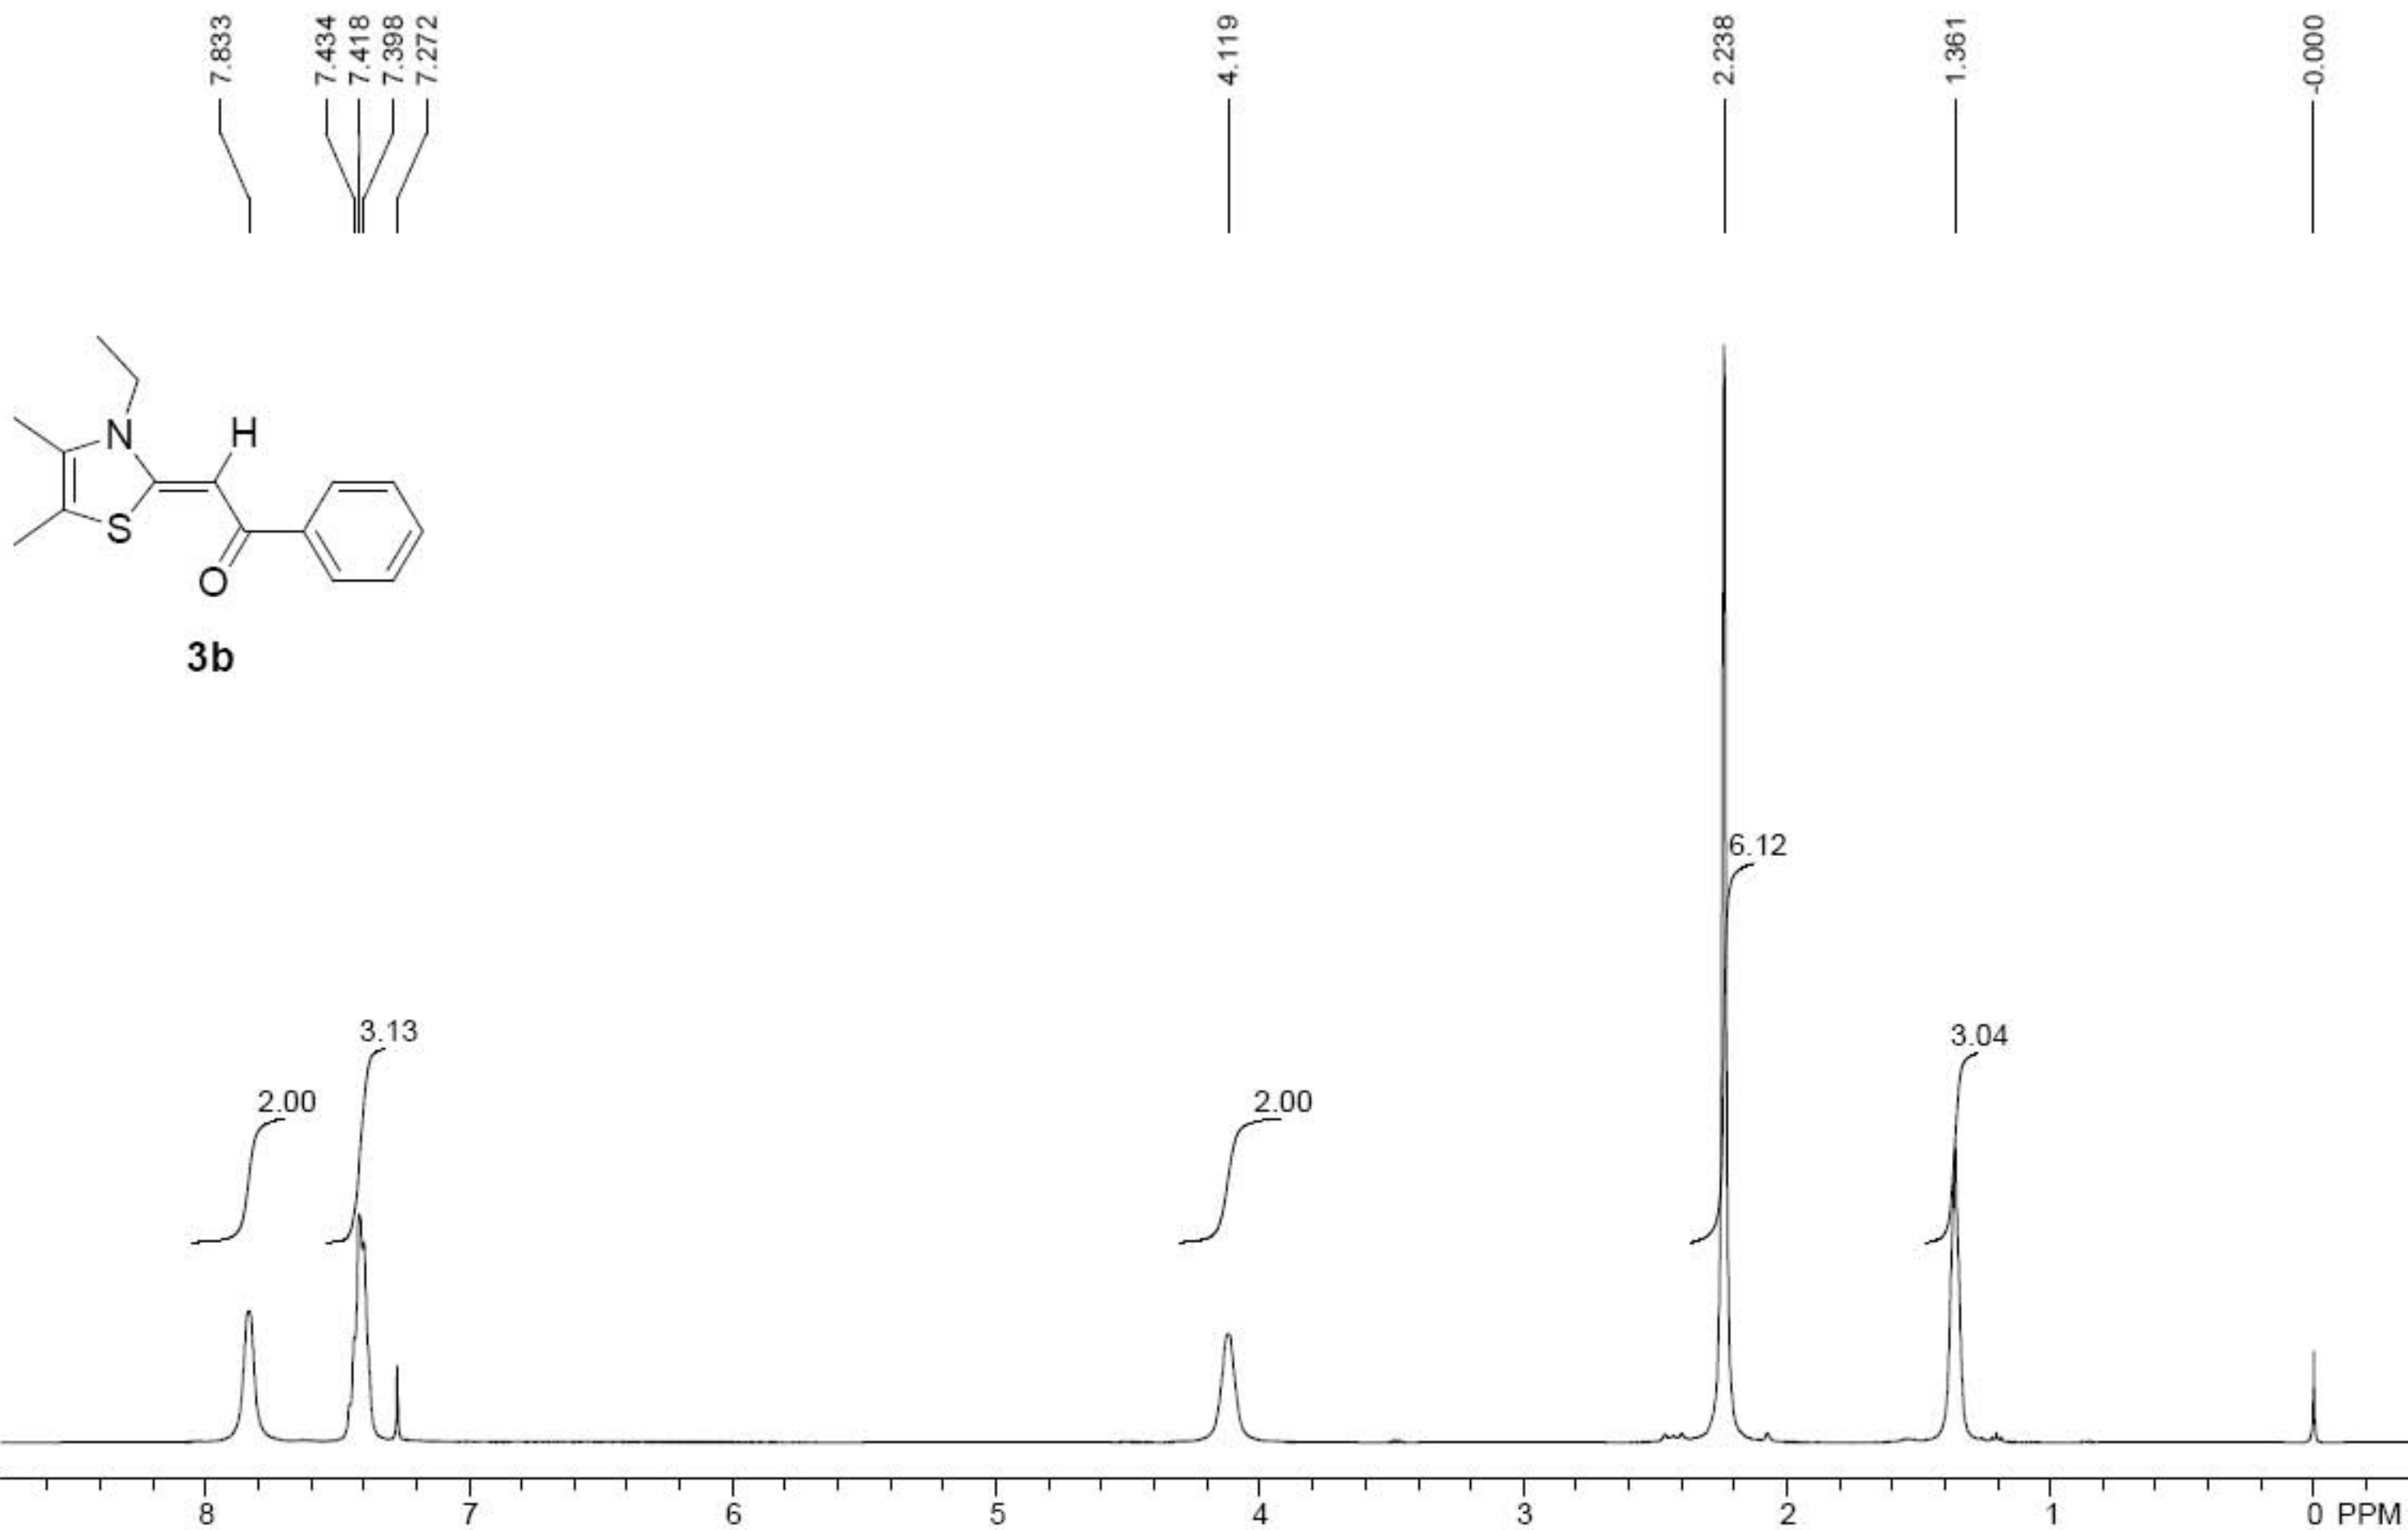

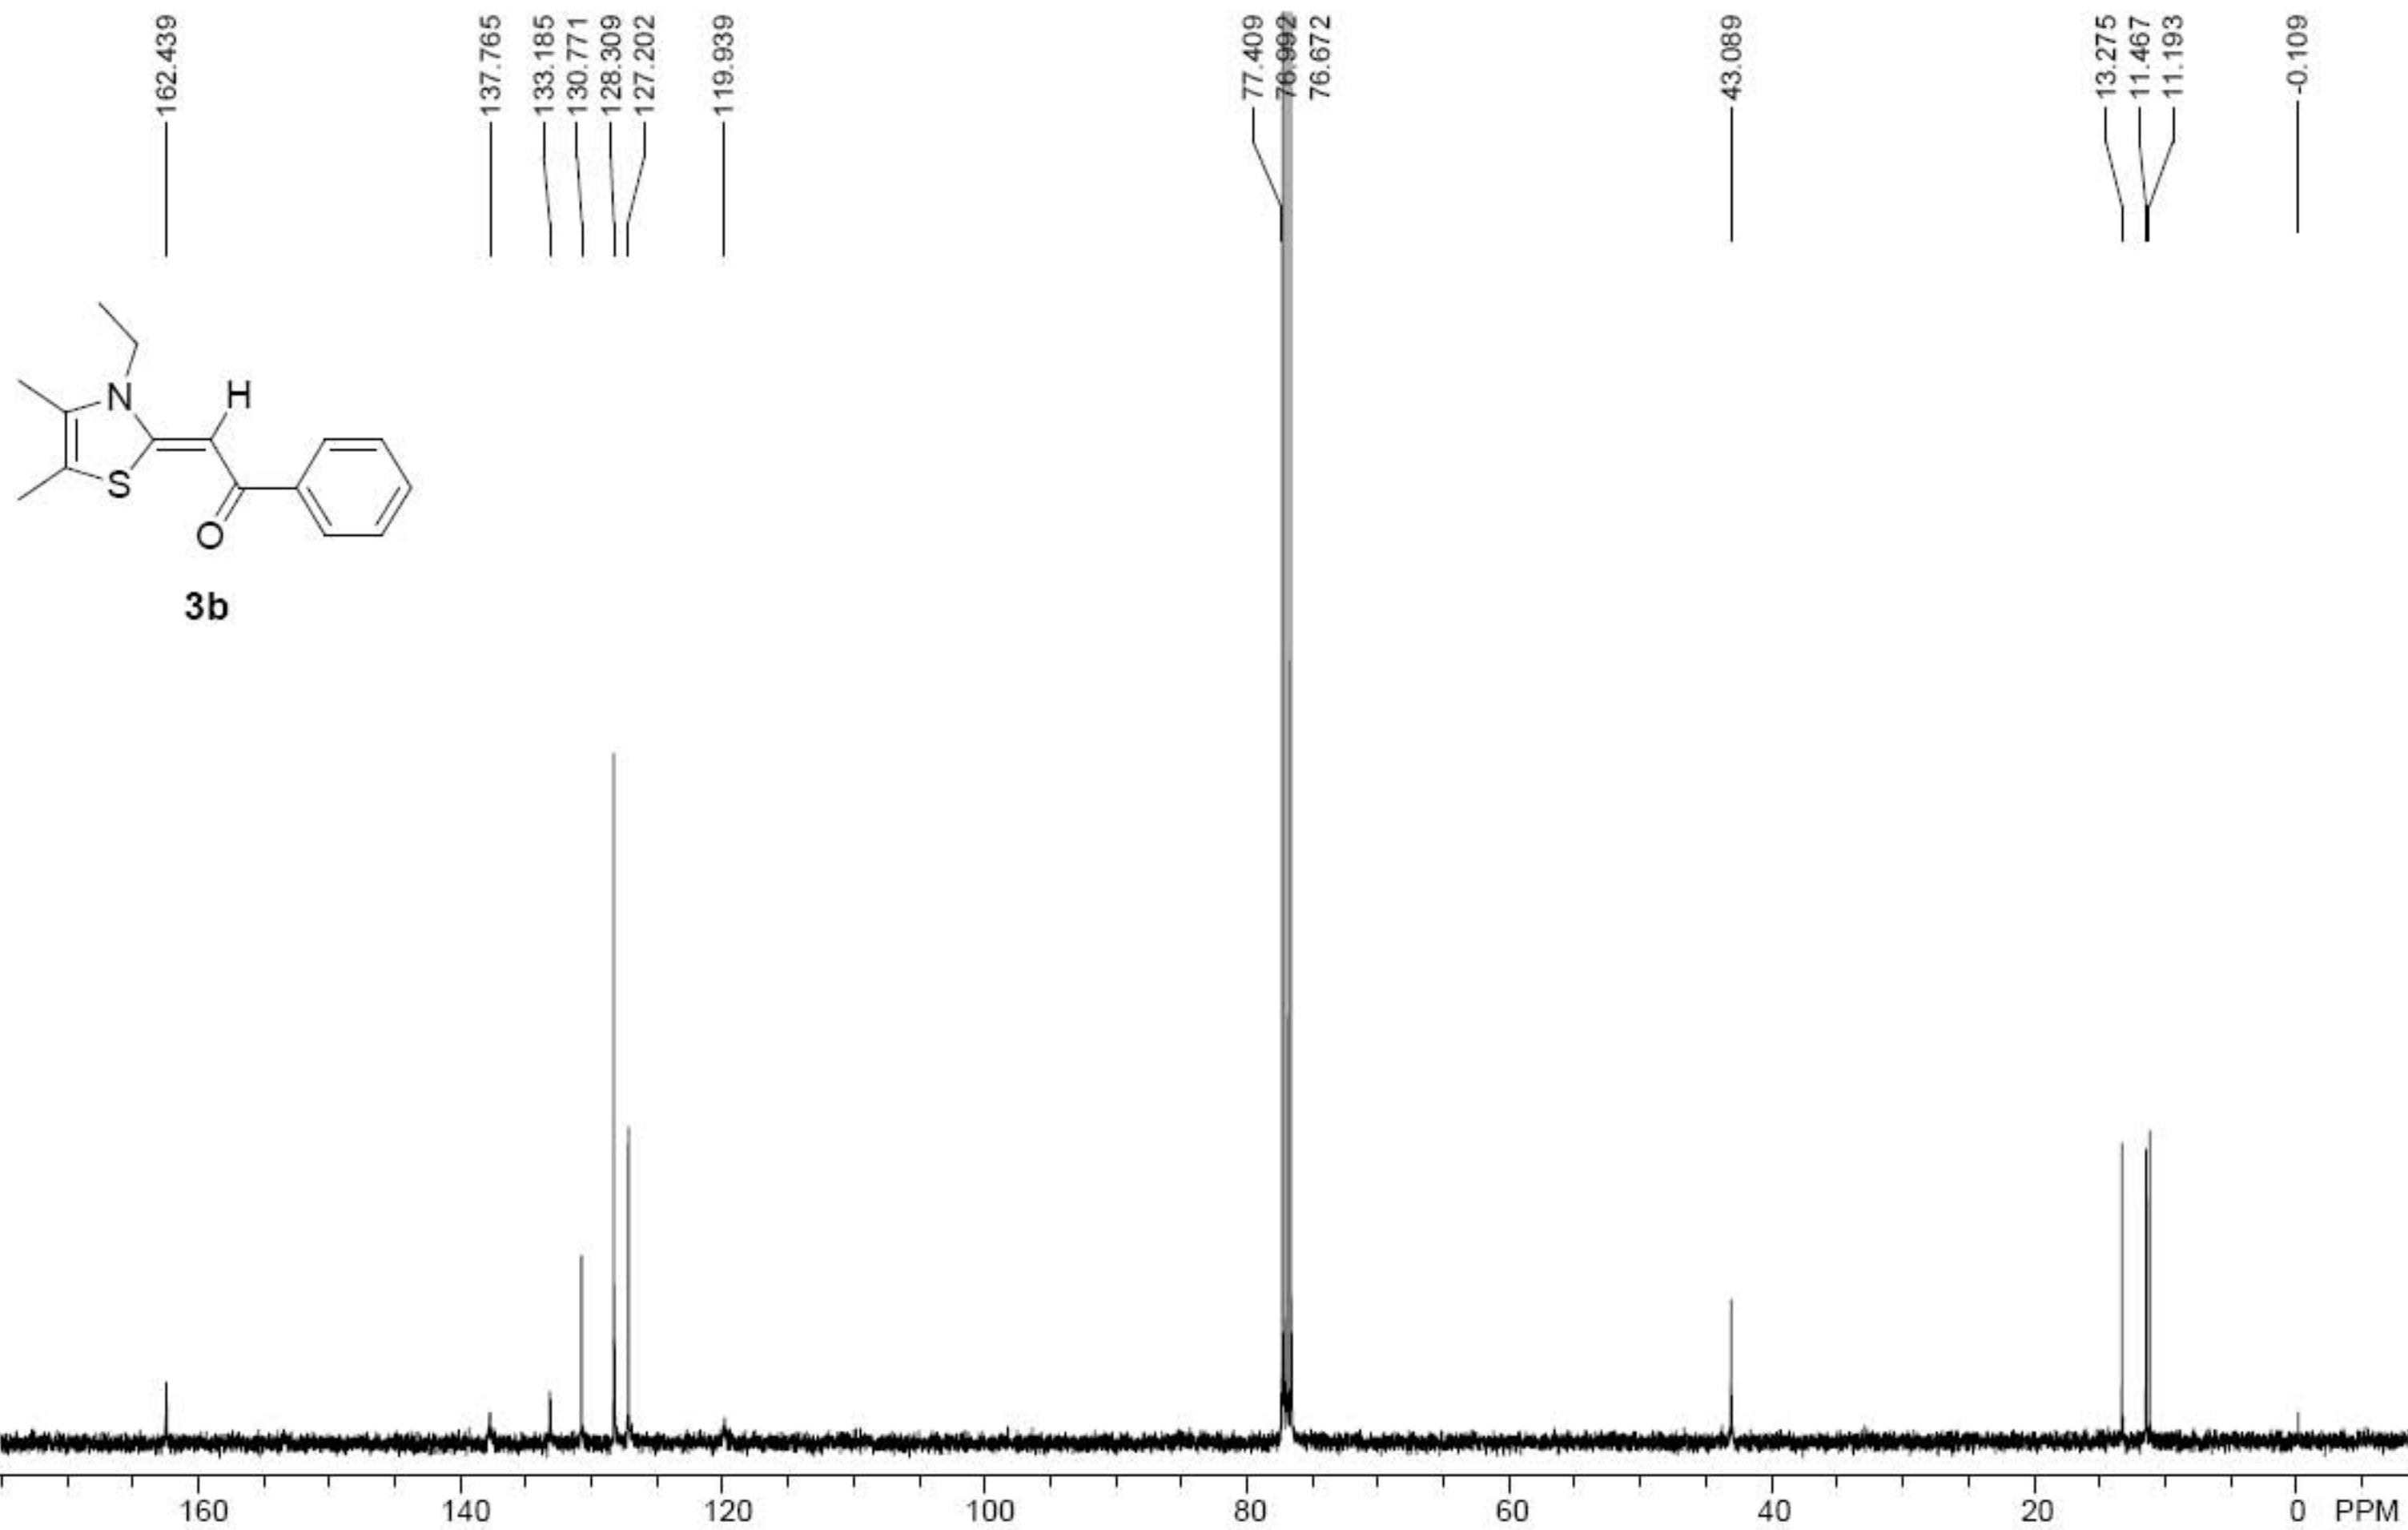

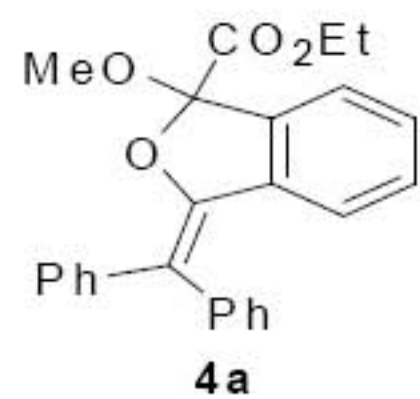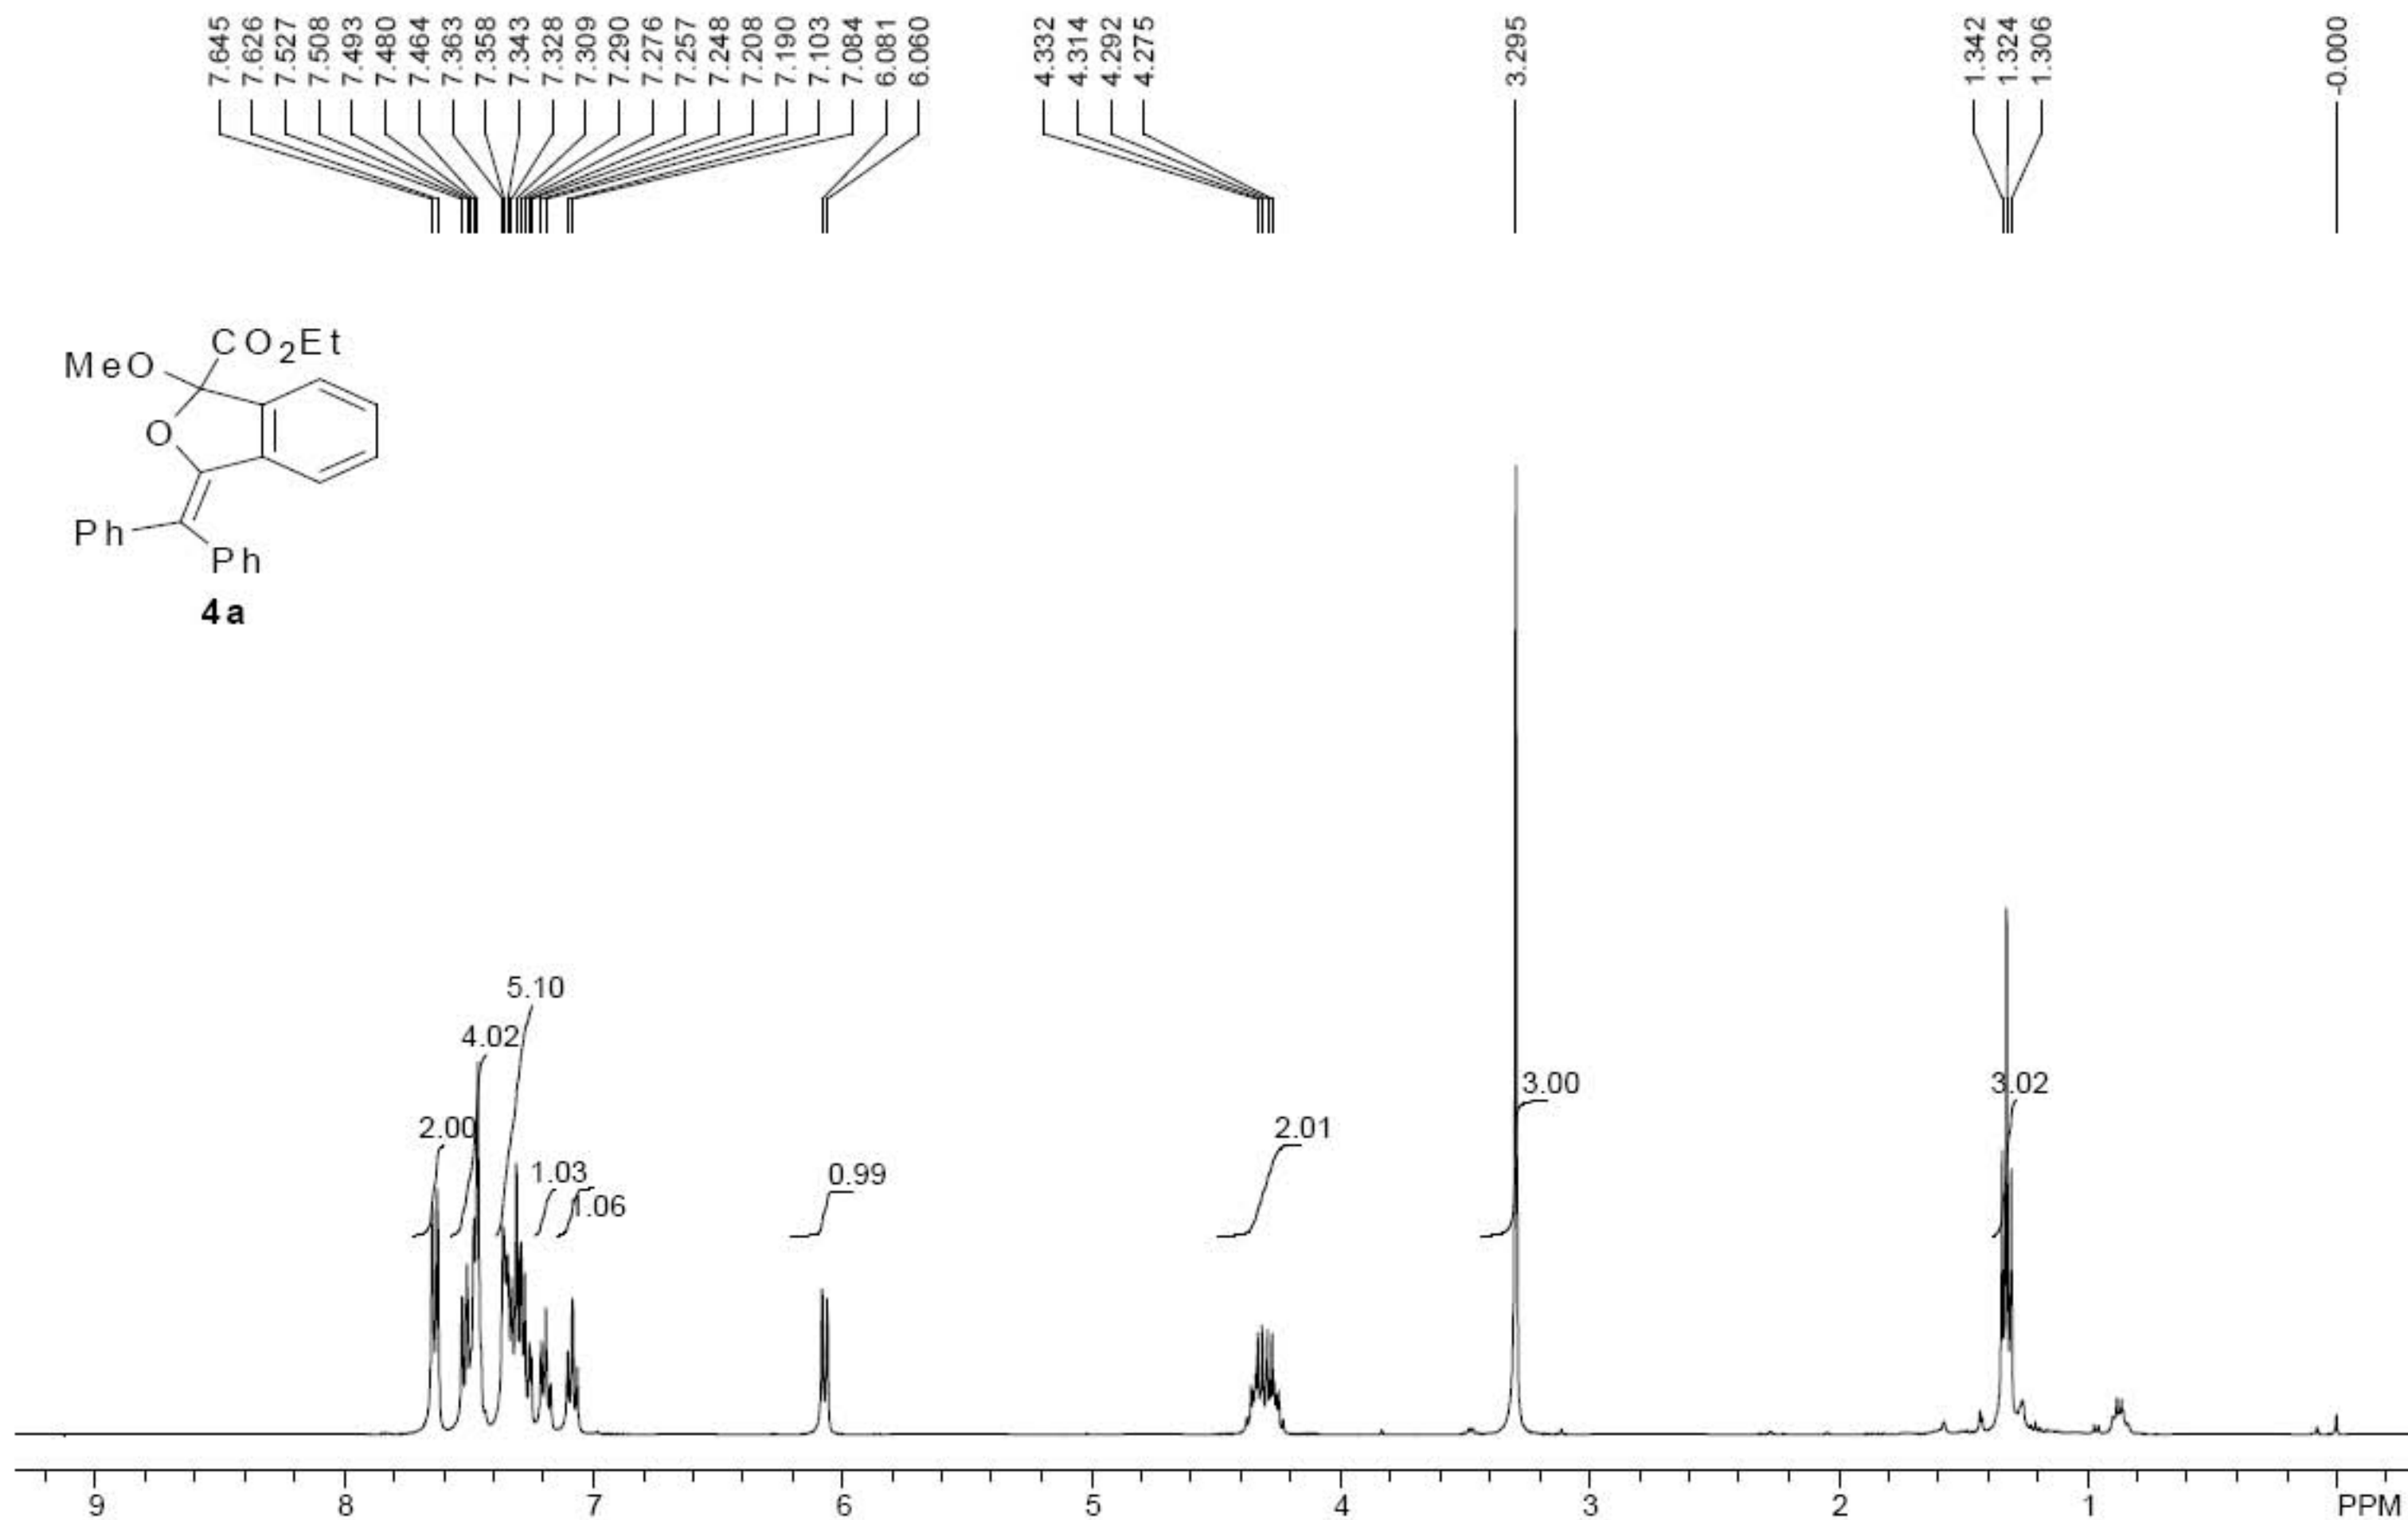

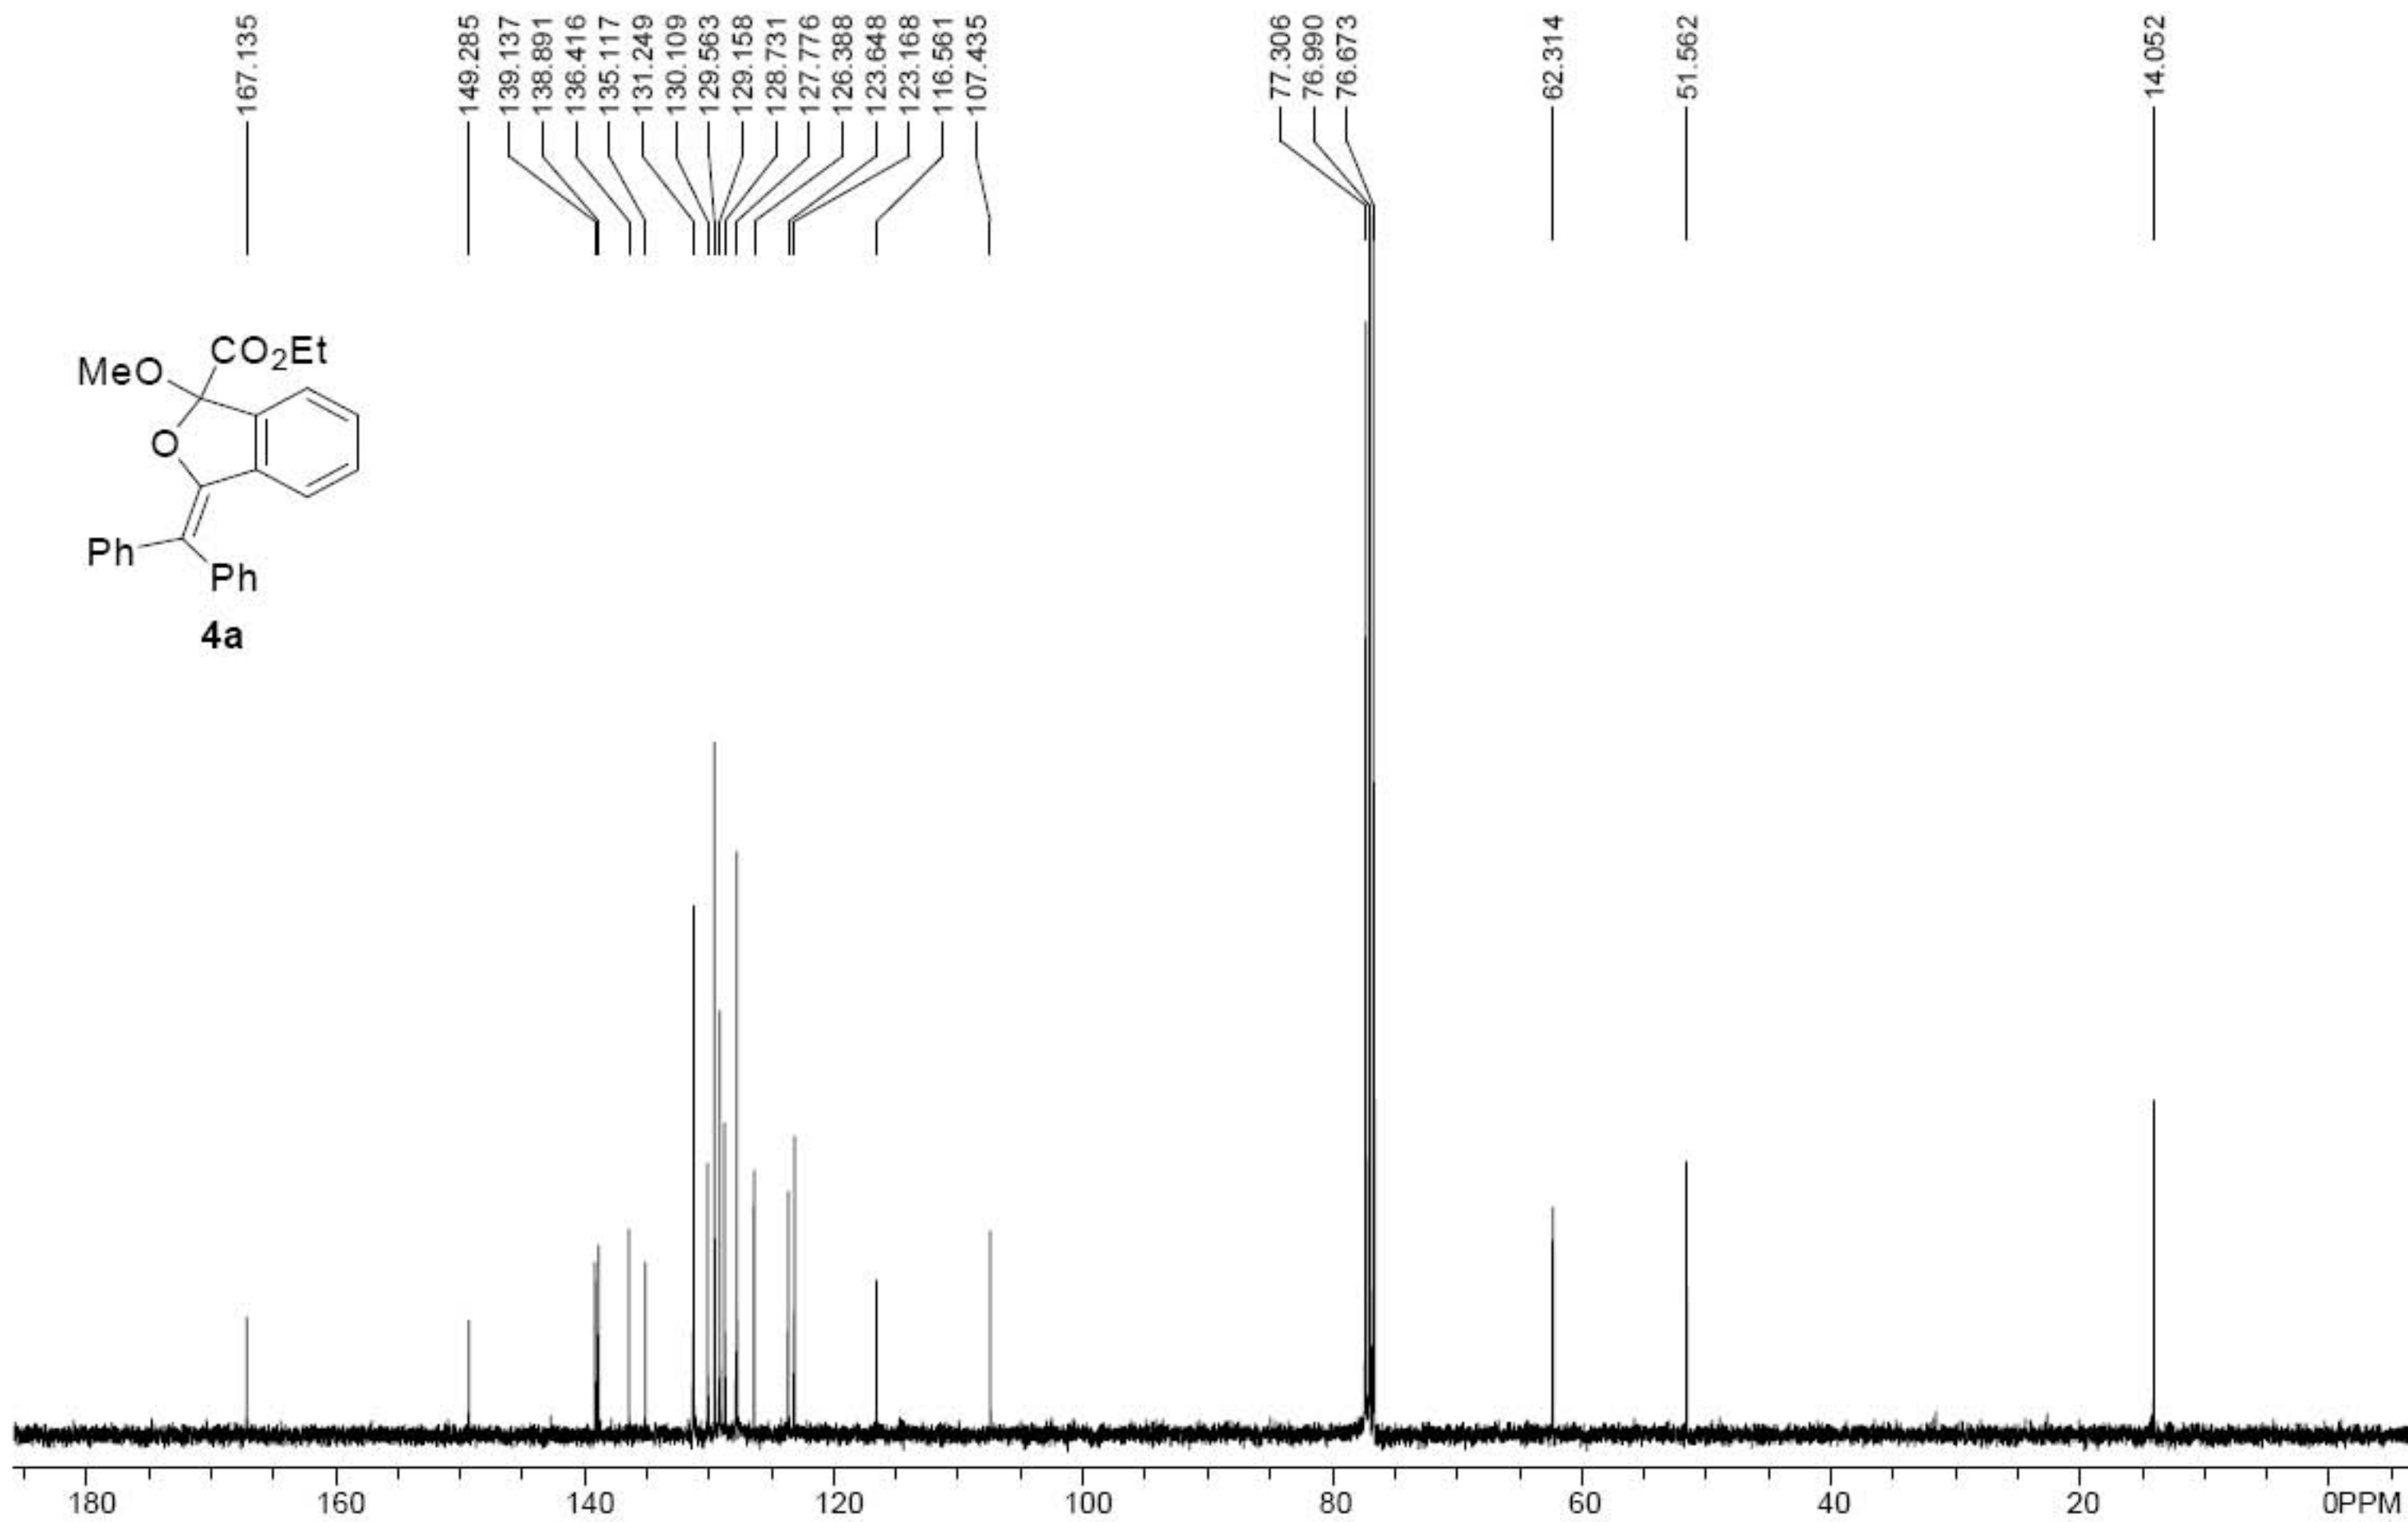



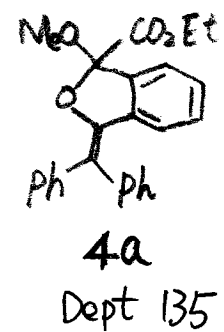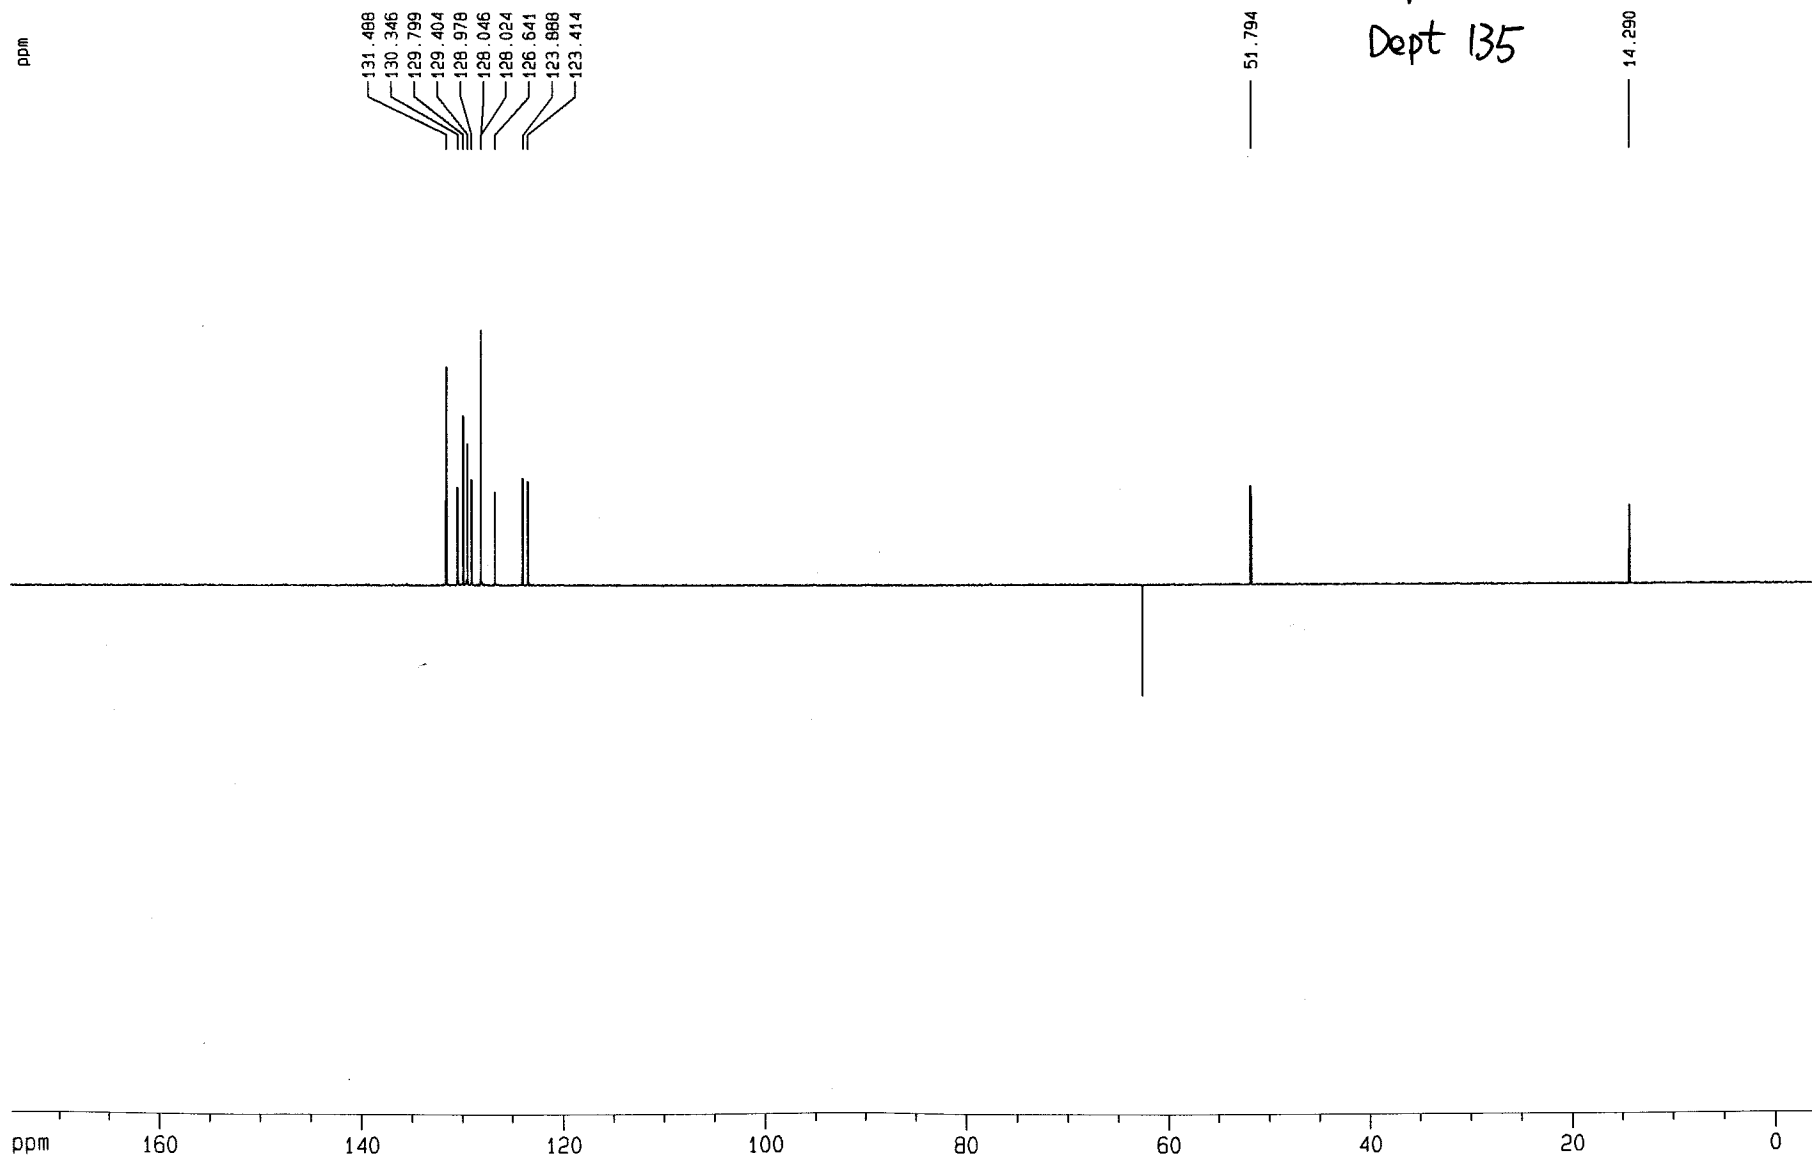

*Handwritten:* H-HCOSY

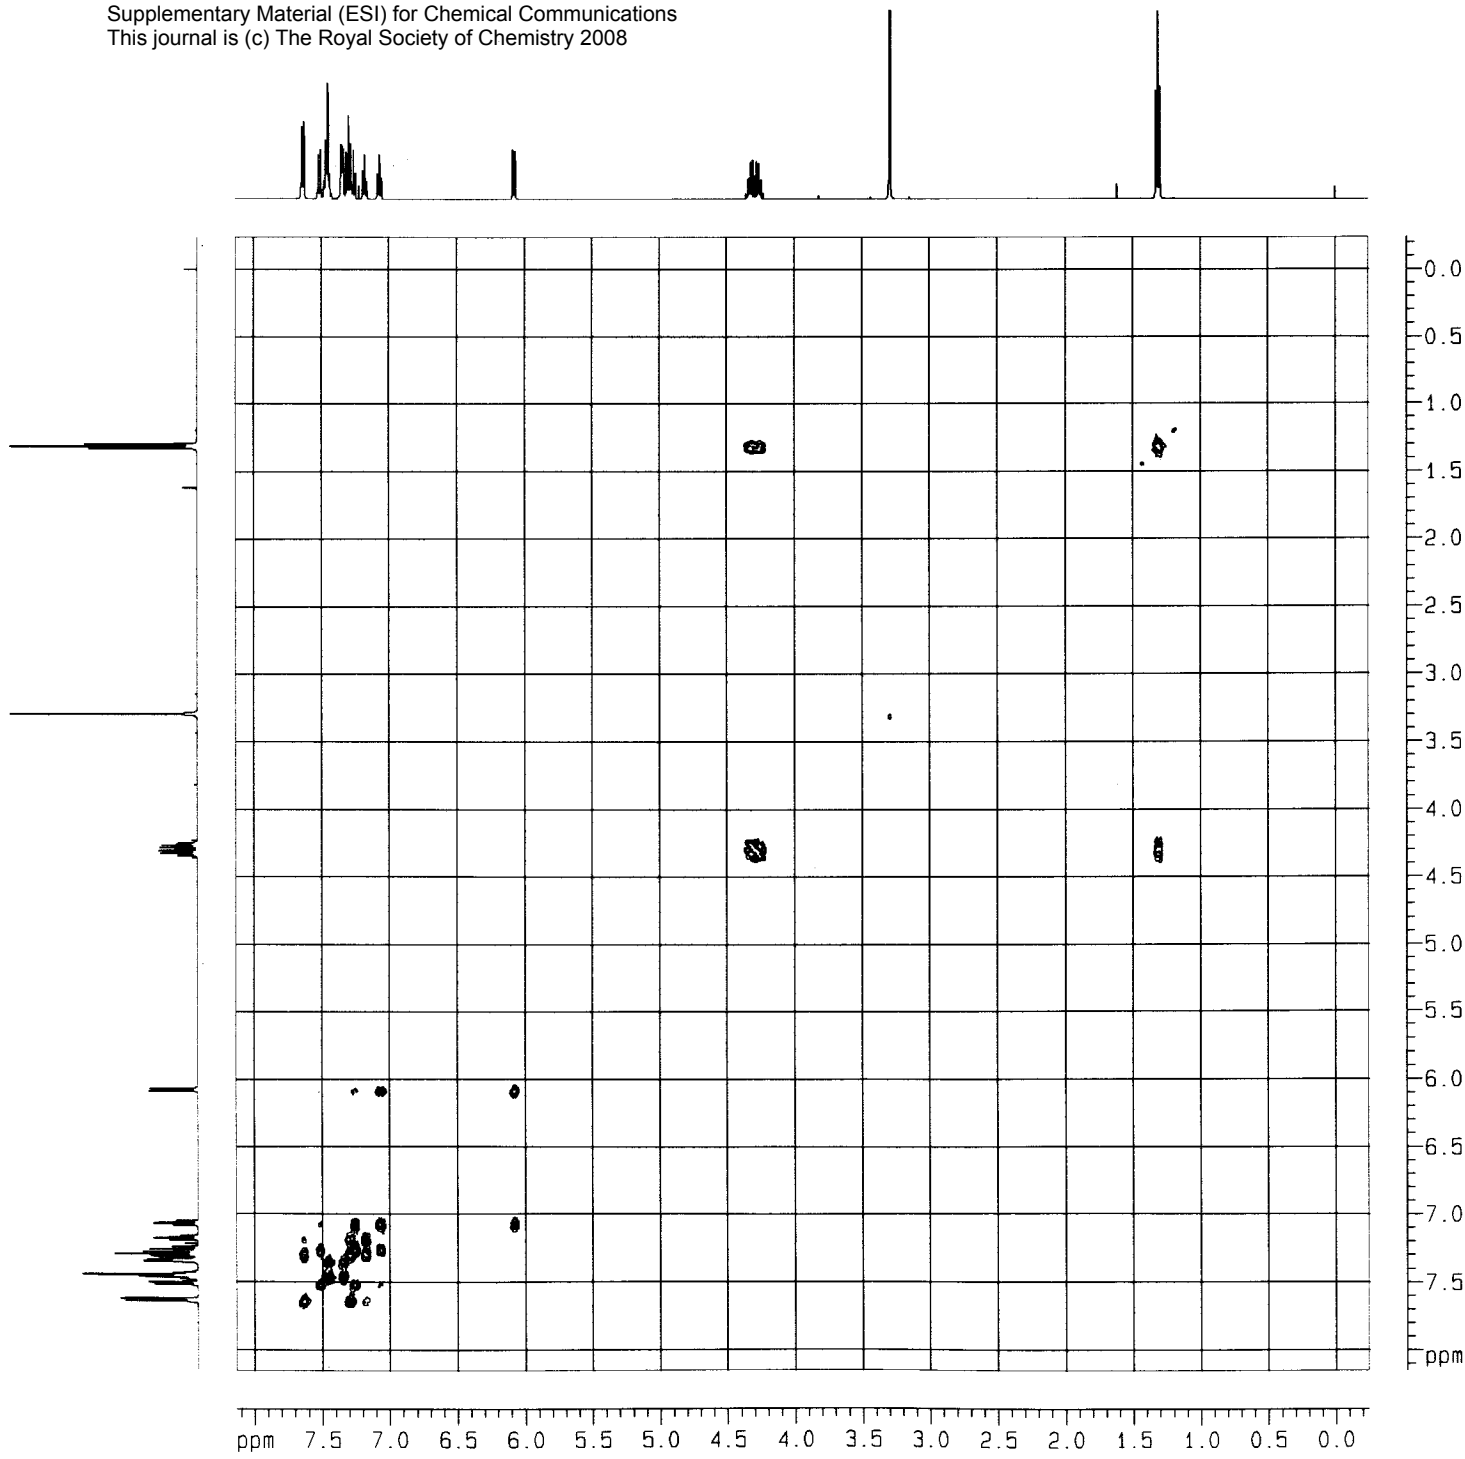

```

Current Data Parameters
NAME          ne2007
EXPNO        593
PROCNO       1

F2 - Acquisition Parameters
Date_        20070402
Time         20.45
INSTRUM      gmx500
PROBHD       5 mm QNP 1H/15
PULPROG      cosygprgf1
TD           2048
SOLVENT      CDCl3
NS           4
DS           8
SWH          4194.831 Hz
FIDRES       2.048180 Hz
AQ           0.2442908 sec
RG           512
DM           119.200 usec
DE           6.00 usec
TE           298.0 K
D0           0.0000300 sec
D1           2.0000000 sec
d13          0.0000400 sec
D16          0.0005000 sec
IND          0.0002801 sec
INCREST      0.0000000 sec
NCRMK        2.0000000 sec

***** CHANNEL f1 *****
NUC1         1H
P1           10.10 usec
PL1          4.00 dB
SFO1         500.1320070 MHz

***** GRADIENT CHANNEL *****
GPNAM1      SINE.100
GPNAM2      SINE.100
GPNAM3      SINE.100
GPX1        0.00 %
GPX2        0.00 %
GPX3        0.00 %
GPY1        0.00 %
GPY2        0.00 %
GPY3        0.00 %
GPZ1        16.00 %
GPZ2        12.00 %
GPZ3        40.00 %
P16         1500.00 usec

F1 - Acquisition parameters
NUC1         1
TD           256
SFO1         500.132 MHz
FIDRES       16.391293 Hz
SW           8.390 ppm
F1MODE       QF

F2 - Processing parameters
SI           1024
SF           500.1300333 MHz
WDW          SINE
SSB          0
LB           0.00 Hz
GB           0
PC           1.40

F1 - Processing parameters
SI           1024
MC2         QF
SF           500.1300298 MHz
WDW          SINE
SSB          0
LB           0.00 Hz
GB           0

2D NMR plot parameters
CX2         15.00 cm
CX1         15.00 cm
F2PL0       6.140 ppm
F2L0        4071.03 Hz
F2PHI       -0.247 ppm
F2HT        -123.60 Hz
F1PL0       6.148 ppm
F1L0        4075.28 Hz
F1PHI       -0.242 ppm
F1HT        -120.89 Hz
F2PPMCH     0.55914 ppm/cm
F2HZCM      279.64206 Hz/cm
F1PPMCH     0.55934 ppm/cm
F1HZCM      279.74476 Hz/cm
    
```

NOESY 4Q

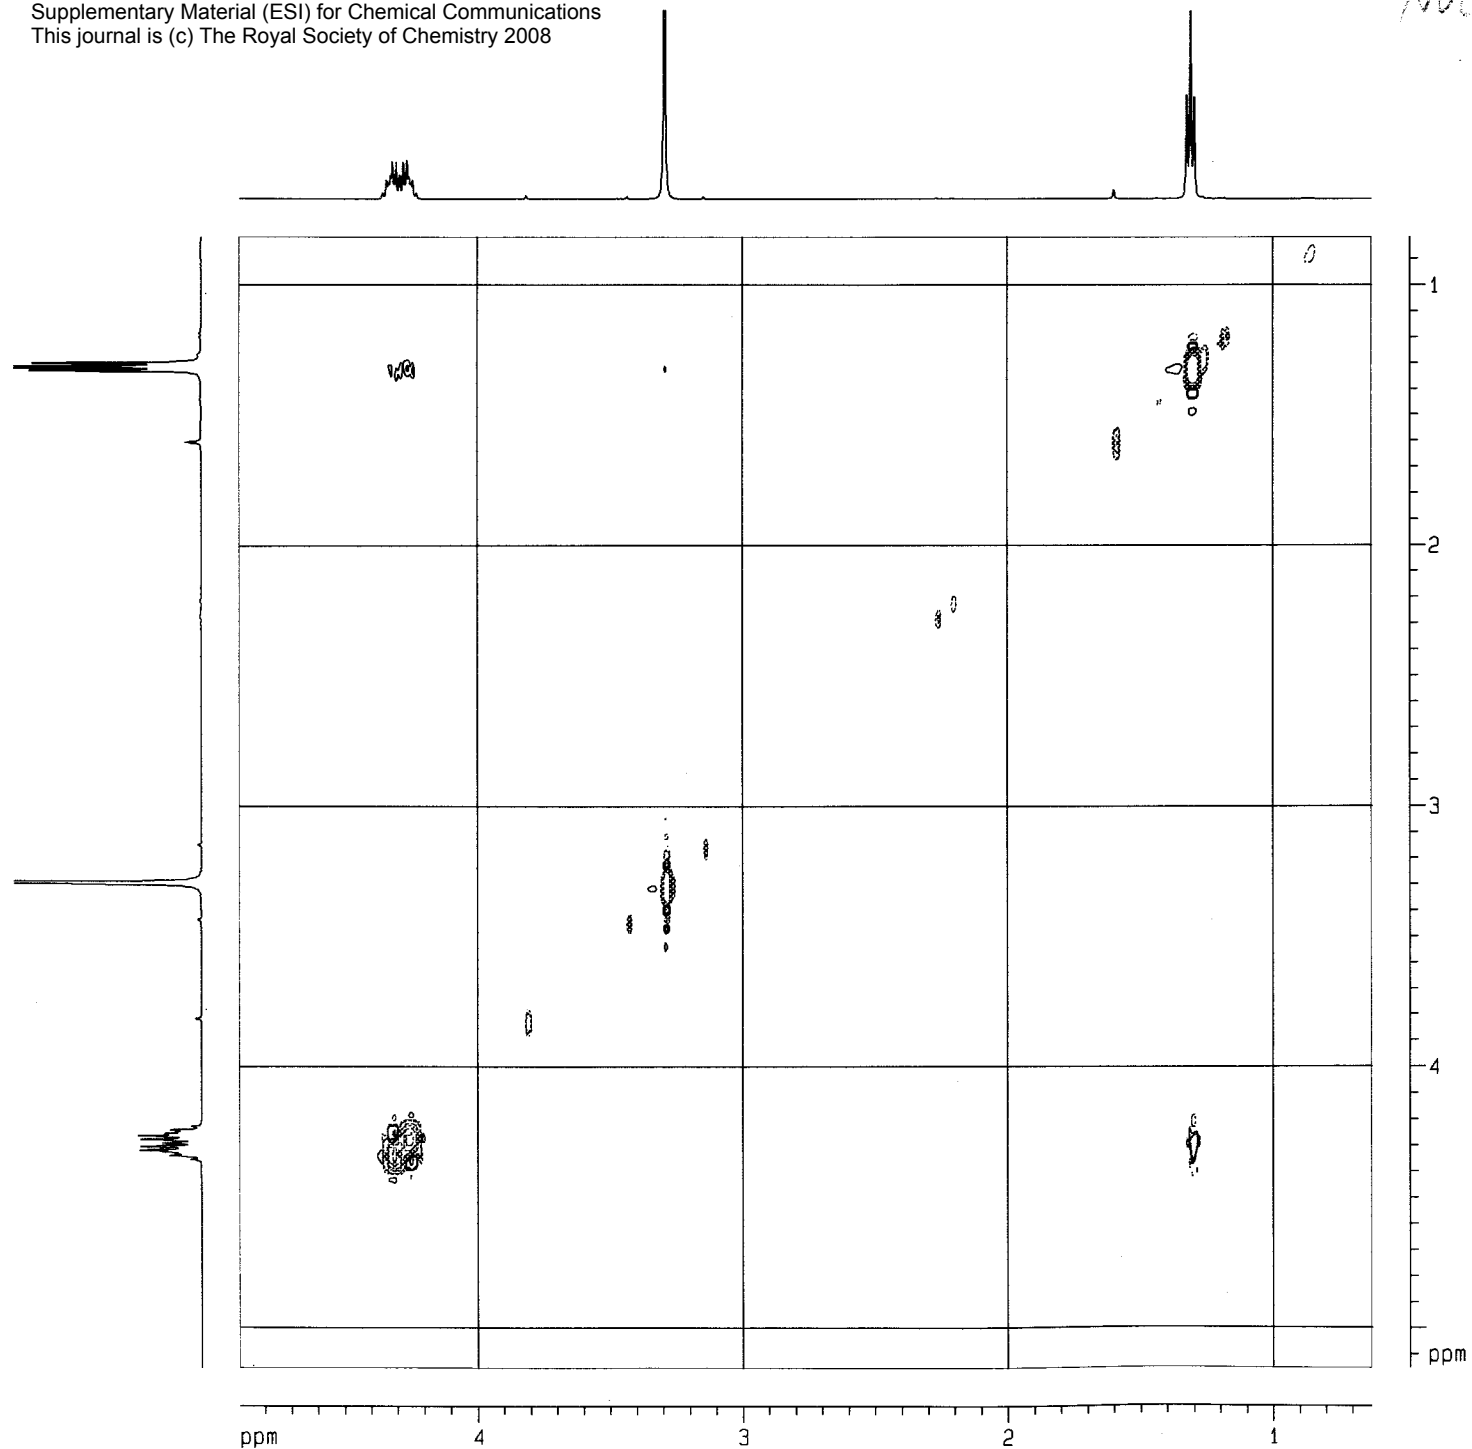

```

Current Data Parameters
NAME          suncr
EXPNO         1803
PROCNO        1

F2 - Acquisition Parameters
Date_         20070415
Time          17.35
INSTNUM      omx500
PROBHD       5 mm QNP 1H/13
PULPROG      noesyph
TD           2048
SOLVENT      CDCl3
NS           32
DS           4
SMH          4595.588 Hz
FIDRES       2.243940 Hz
AQ           0.2229812 sec
RG           256
DM           108.800 usec
DE           6.00 usec
TE           300.6 K
D0           0.0009759 sec
D1           1.5000000 sec
D8           0.6000002 sec
IN0          0.00021734 sec
MCREST       0.0000000 sec
MCHNK        0.7500000 sec
ST1CNT       128

----- CHANNEL f1 -----
NUC1          1H
P1            8.70 usec
PL1           4.00 dB
SFO1         500.1320280 MHz

F1 - Acquisition parameters
NDO           1
TD           256
SFO1         500.132 MHz
FIDRES       17.973198 Hz
SN           9.200 ppm
FMODE        States-TPPI

F2 - Processing parameters
SI           1024
SF           500.1300363 MHz
NDM          QSINE
SSB          2
LB           0.00 Hz
GB           0
PC           1.00

F1 - Processing parameters
SI           1024
M02          States-TPPI
SF           500.1300255 MHz
NDM          QSINE
SSB          2
LB           0.00 Hz
GB           0

2D NMR plot parameters
CX2          15.00 cm
CX1          15.00 cm
F2PLO       4.898 ppm
F2L0        2449.50 Hz
F2PHI       0.626 ppm
F2HI        313.27 Hz
F1PLO       5.154 ppm
F1L0        2577.66 Hz
F1PHI       0.815 ppm
F1HI        407.40 Hz
F2PPMCM     0.28476 ppm/cm
F2HZCM      142.41531 Hz/cm
F1PPMCM     0.28929 ppm/cm
F1HZCM      144.68419 Hz/cm
    
```

# NOESY 4a

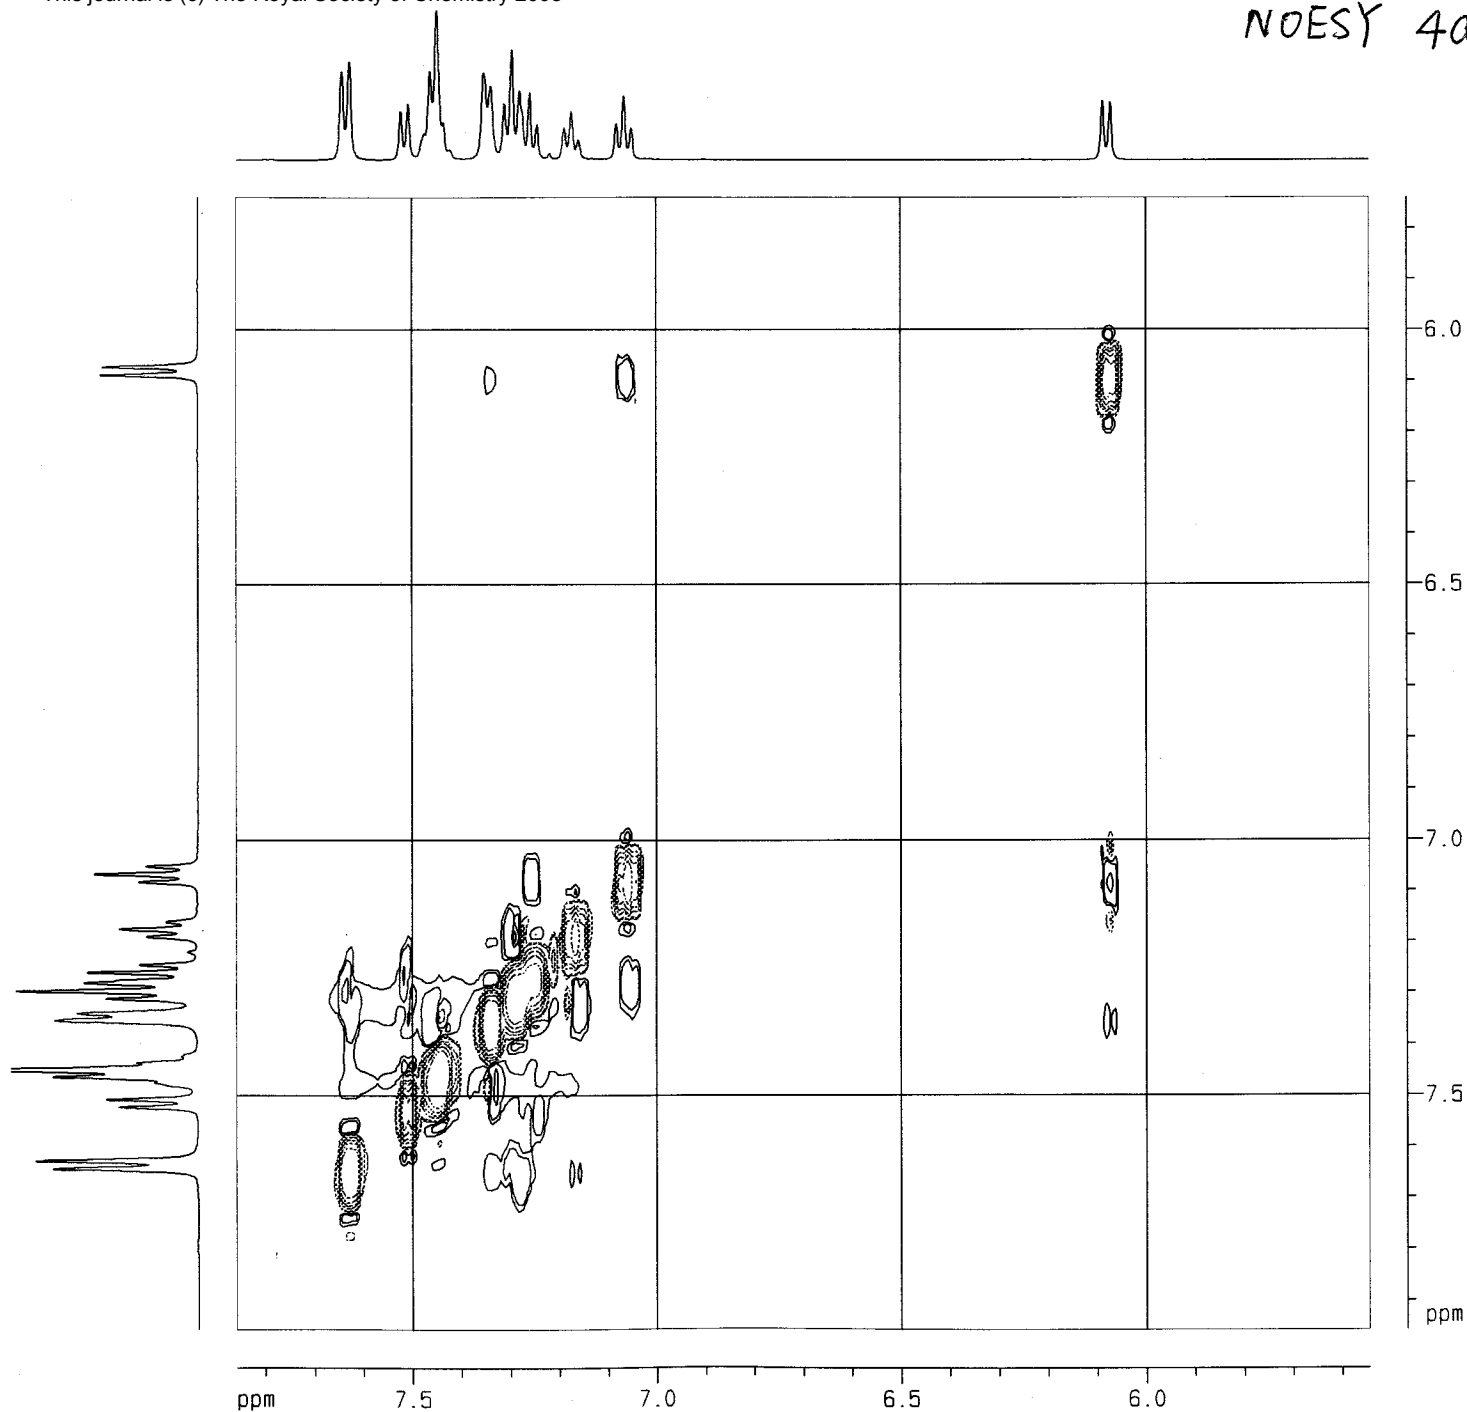

Current Data Parameters  
NAME suncr  
EXPNO 1803  
PROCNO 1

F2 - Acquisition Parameters  
Date\_ 20070415  
Time 17.35  
INSTRUM cmx500  
PROBHD 5 mm QNP 1H/15  
PULPROG noesyph  
TD 2048  
SOLVENT CDCl3  
NS 32  
DS 4  
SWH 4595.588 Hz  
FIDRES 2.243940 Hz  
AQ 0.2229812 sec  
RG 256  
DW 108.800 usec  
DE 6.00 usec  
TE 300.6 K  
d0 0.00009759 sec  
d1 1.50000000 sec  
d2 0.60000002 sec  
d3 0.00021734 sec  
d4 0.00000000 sec  
d5 0.75000000 sec  
MCREST 0.00000000 sec  
MCHRK 128

----- CHANNEL f1 -----  
NUC1 1H  
P1 8.70 usec  
PL1 4.00 dB  
SFO1 500.1320280 MHz

F1 - Acquisition parameters  
ND0 1  
TD 256  
SFO1 500.132 MHz  
FIDRES 17.973198 Hz  
SW 9.200 ppm  
FREQDE States-TPPI

F2 - Processing parameters  
SI 1024  
SF 500.1300363 MHz  
WDW QSINE  
SSB 2  
LB 0.00 Hz  
GB 0  
PC 1.00

F1 - Processing parameters  
SI 1024  
MC2 States-TPPI  
SF 500.1300255 MHz  
WDW QSINE  
SSB 2  
LB 0.00 Hz  
GB 0

2D NMR plot parameters  
CX2 15.00 cm  
CX1 15.00 cm  
F2PLQ 7.859 ppm  
F2LQ 3930.50 Hz  
F2PHI 5.544 ppm  
F2HI 2772.63 Hz  
F1PLQ 7.957 ppm  
F1LQ 3979.57 Hz  
F1PHI 5.738 ppm  
F1HI 2869.72 Hz  
F2PPNCM 0.15434 ppm/cm  
F2HZCM 77.19149 Hz/cm  
F1PPNCM 0.14794 ppm/cm  
F1HZCM 73.98963 Hz/cm

2.3.

4a  
HMQC

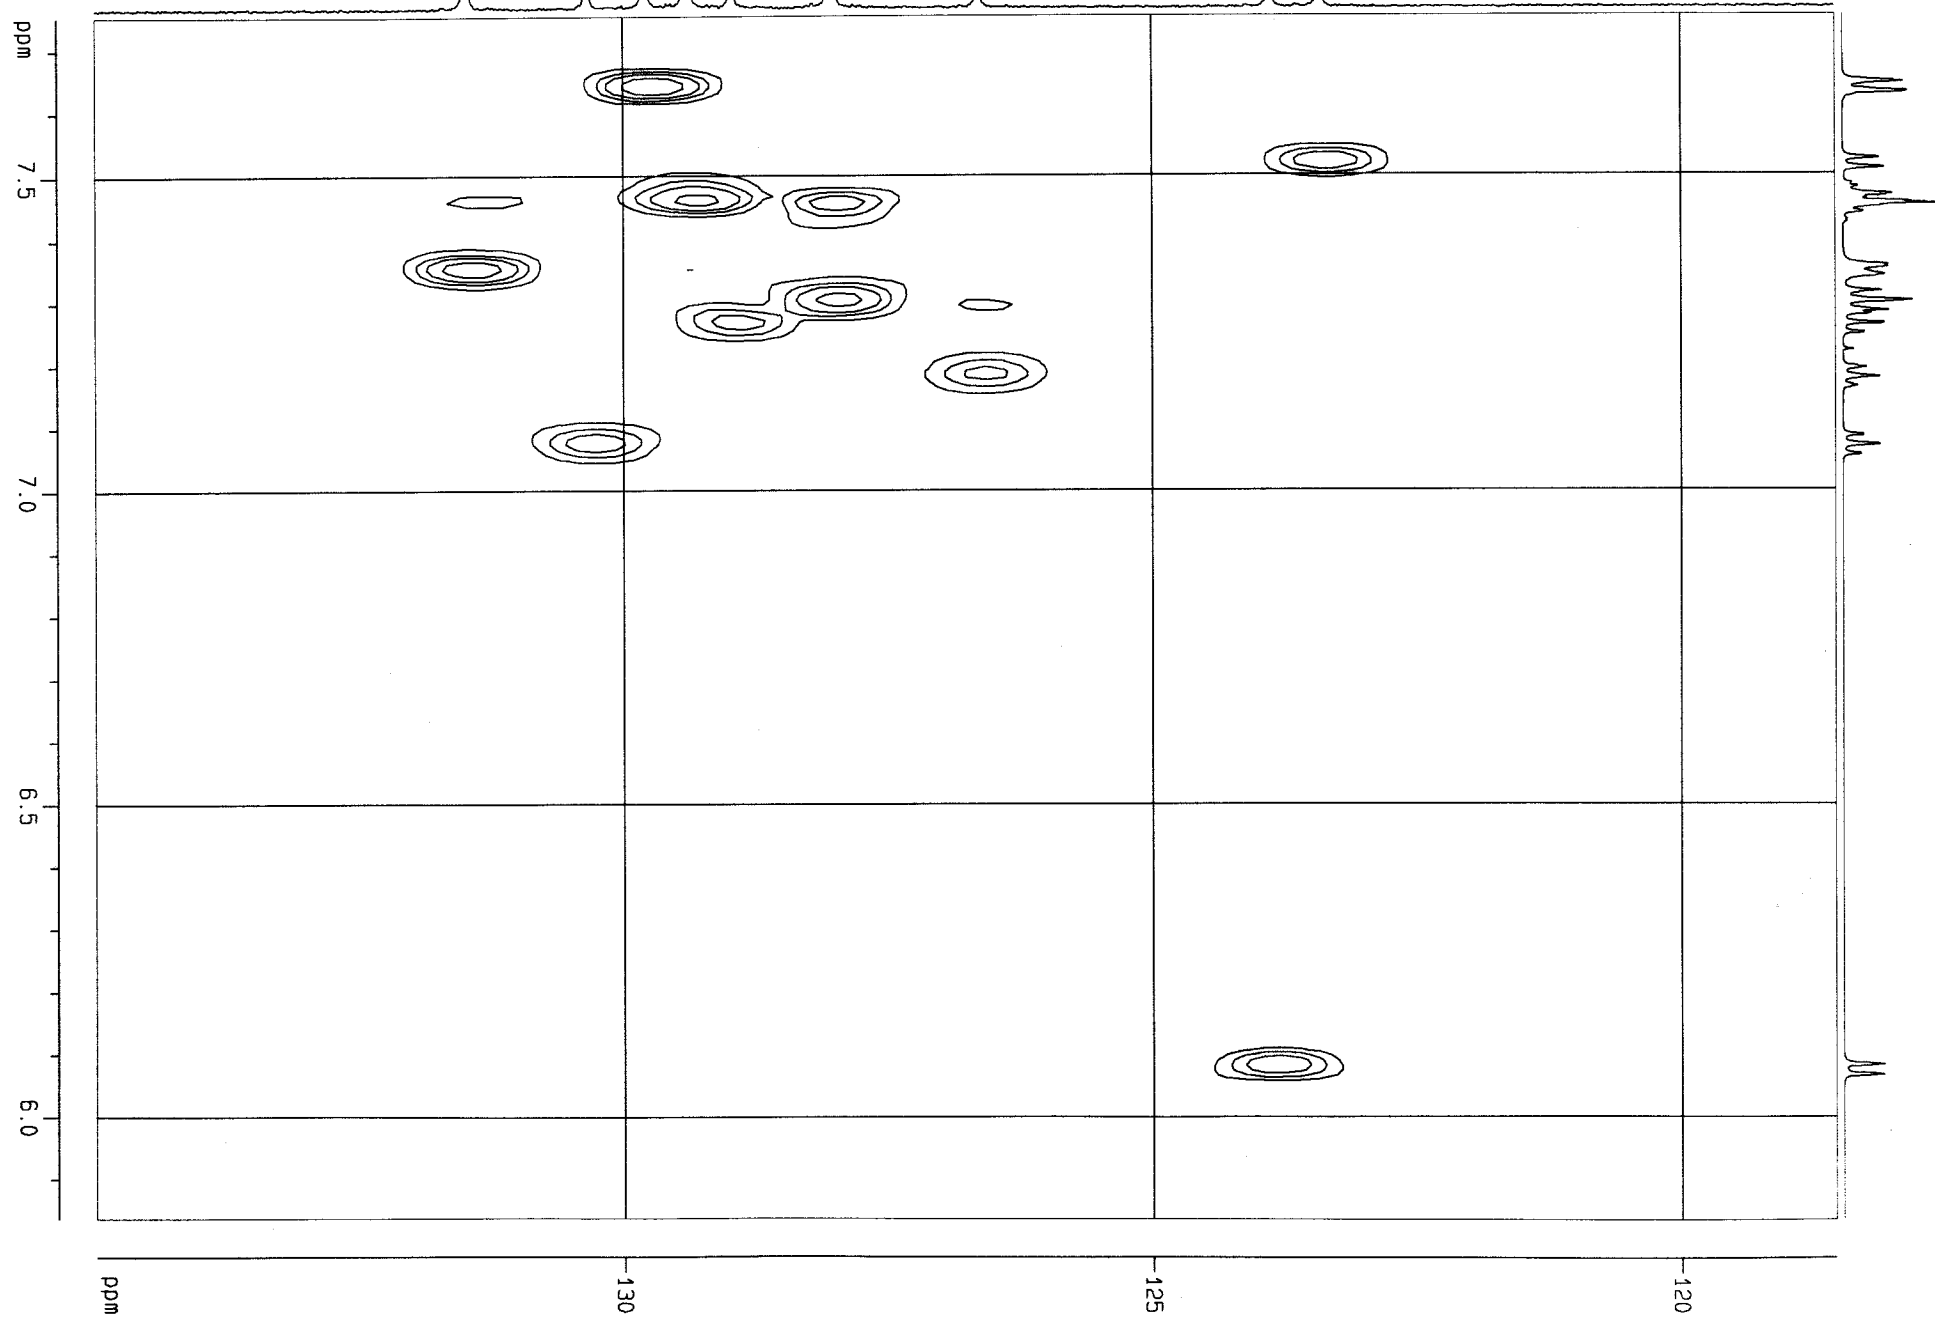

4a  
HMBC

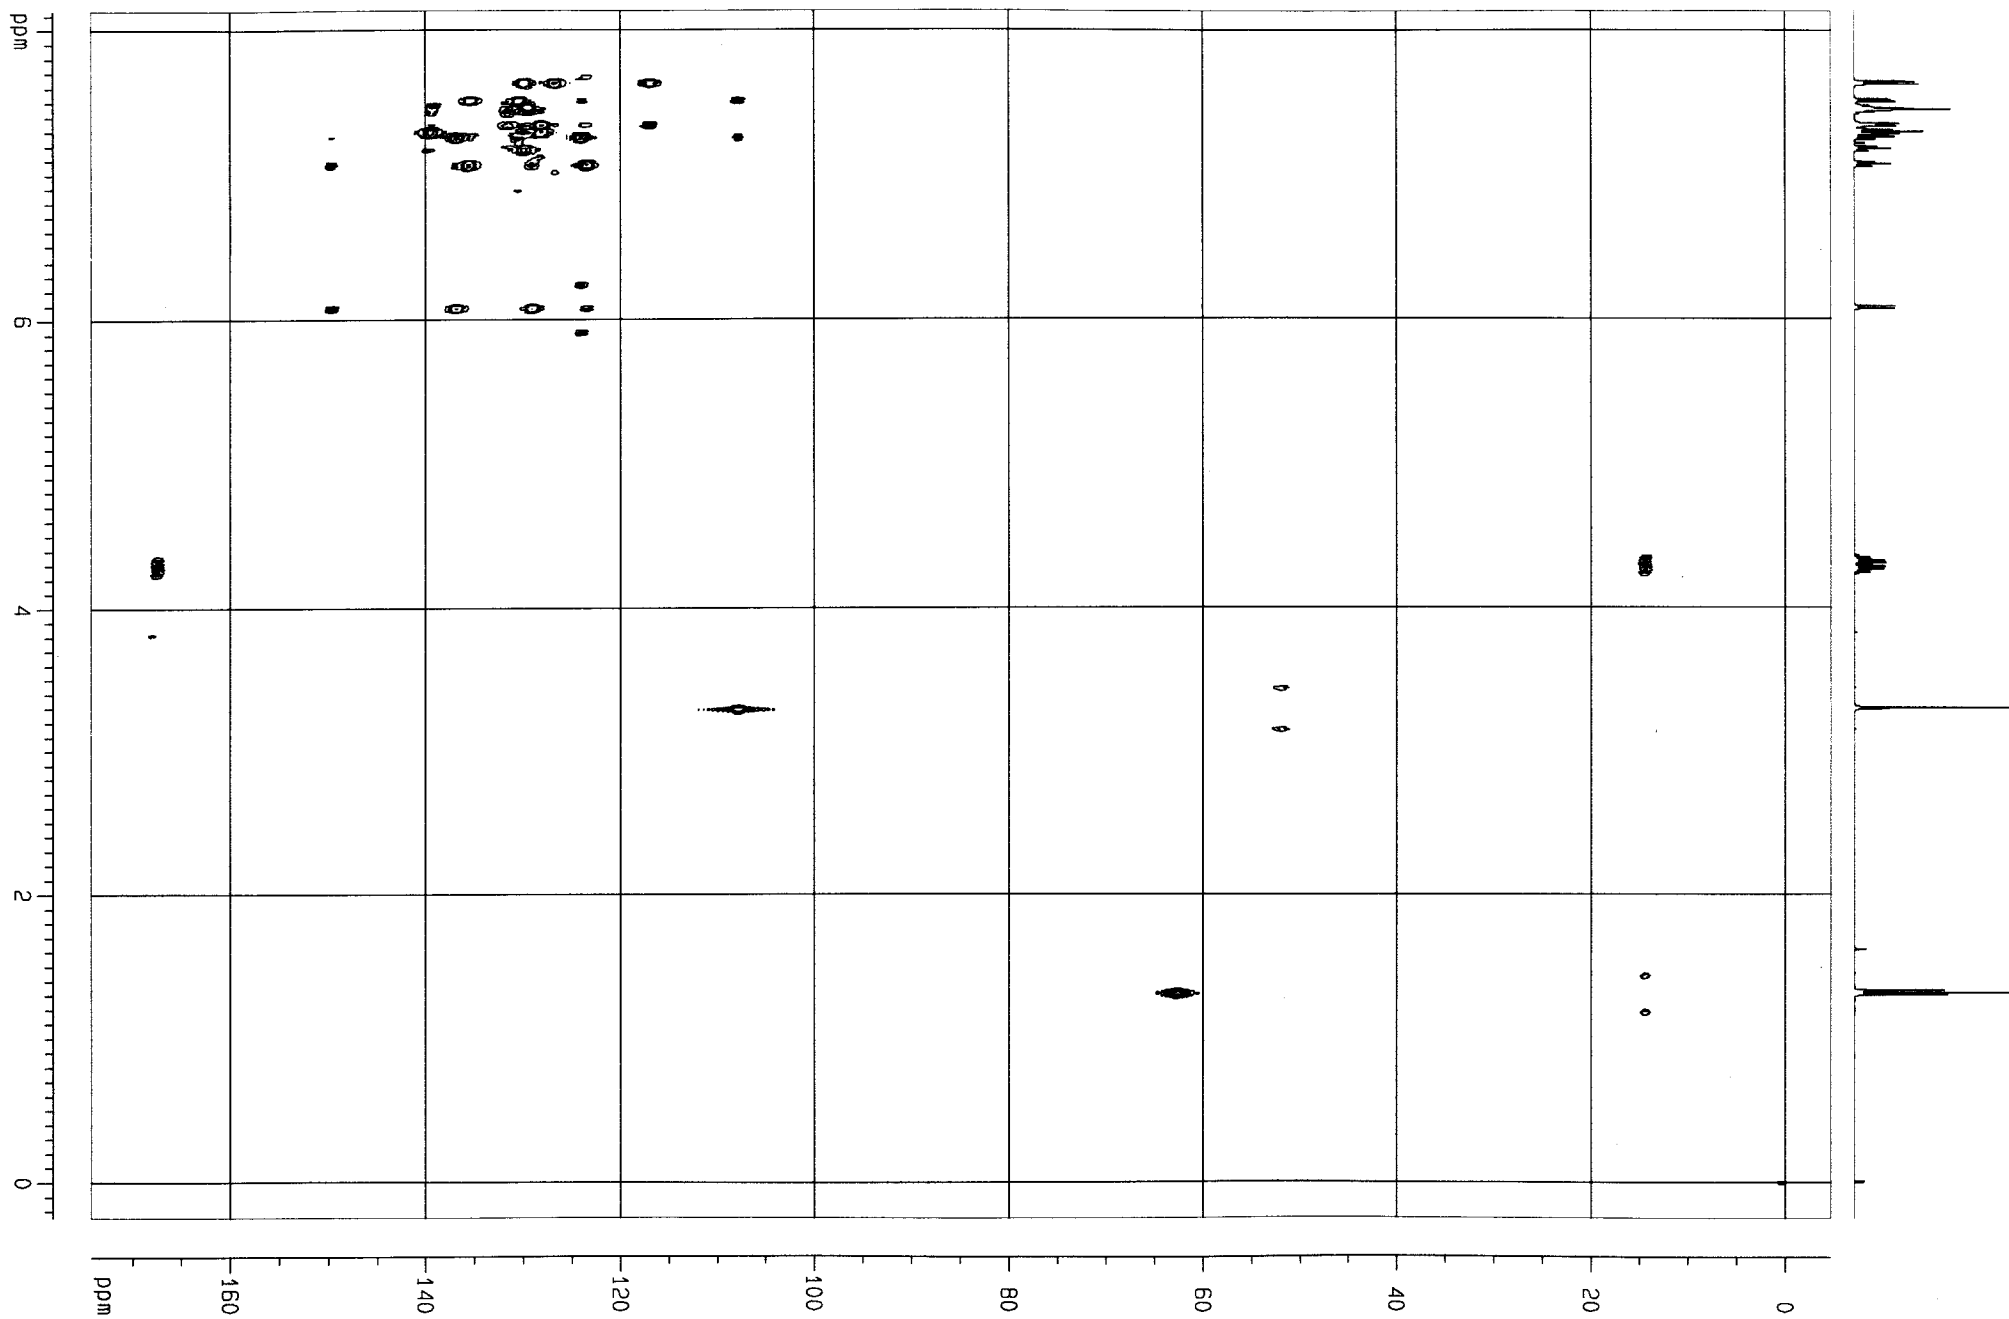

4a  
HMBC

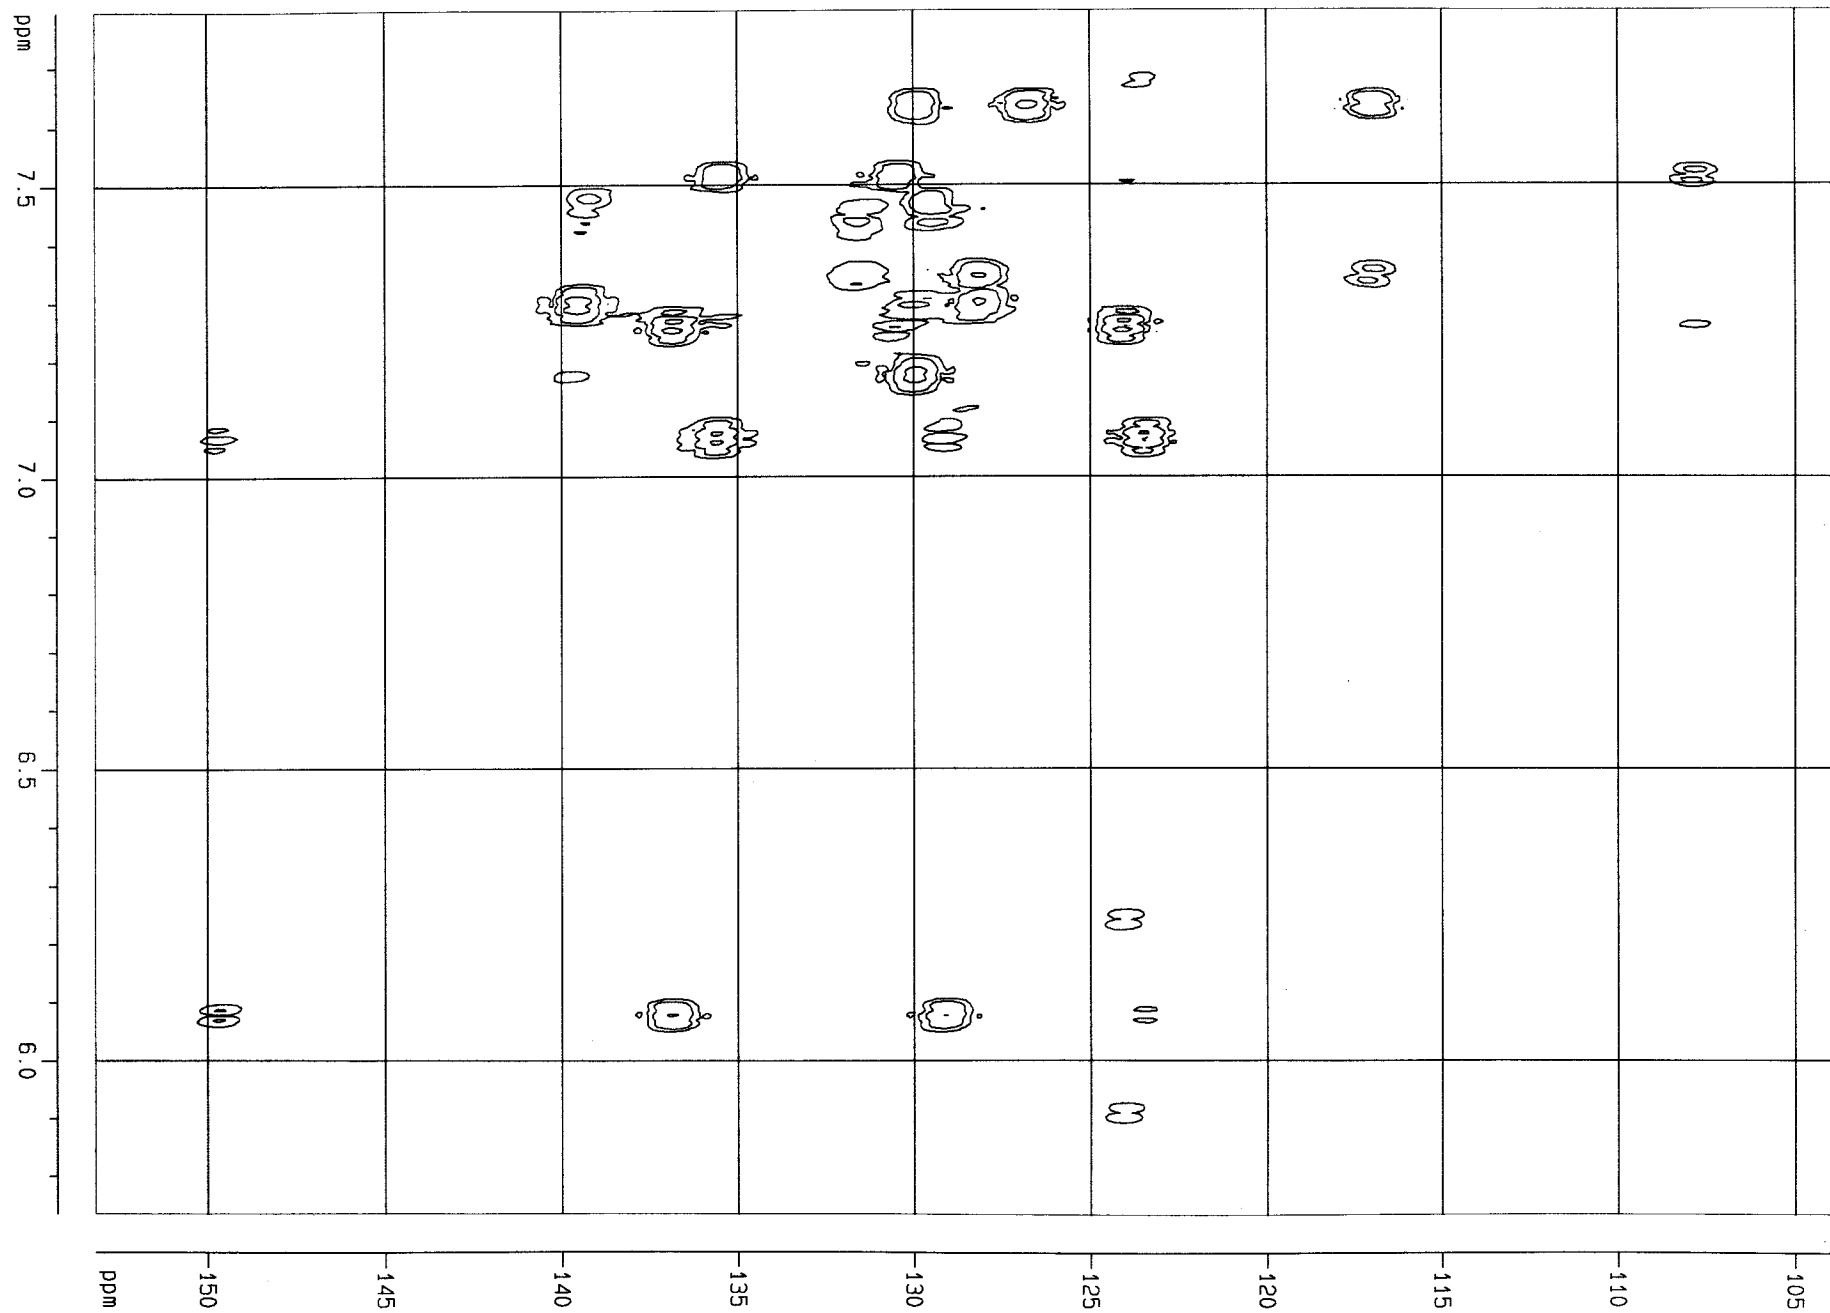

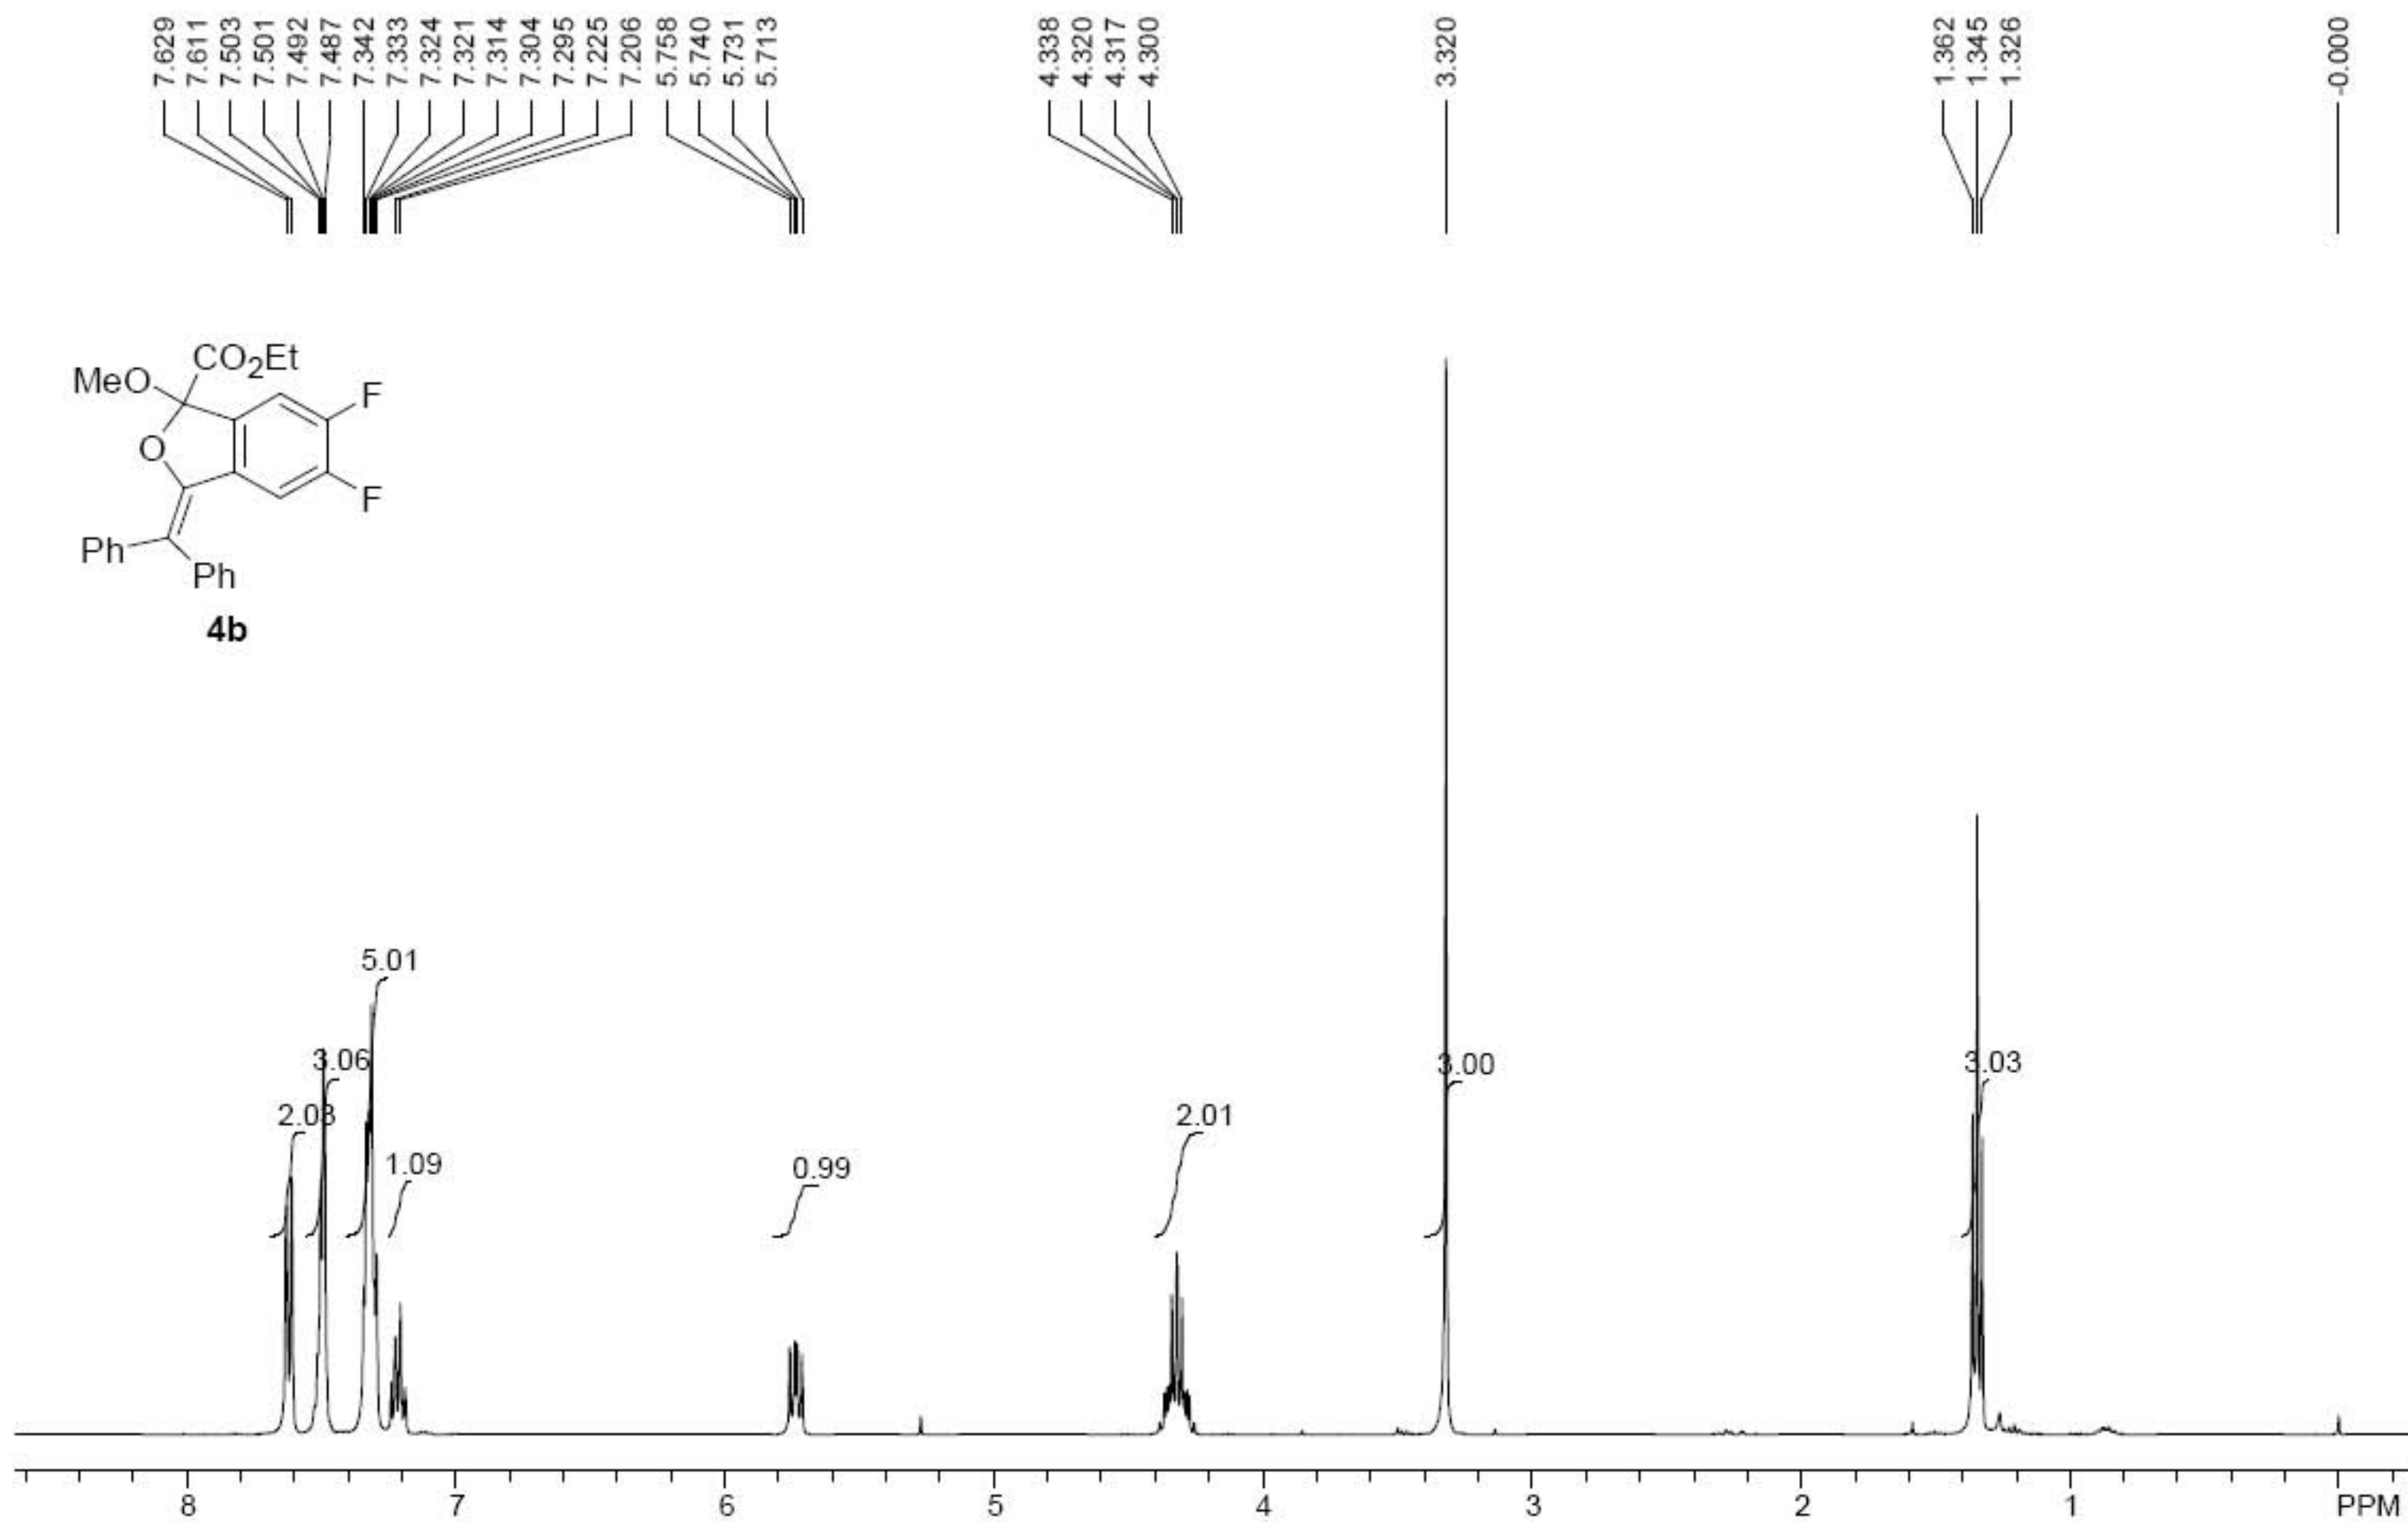



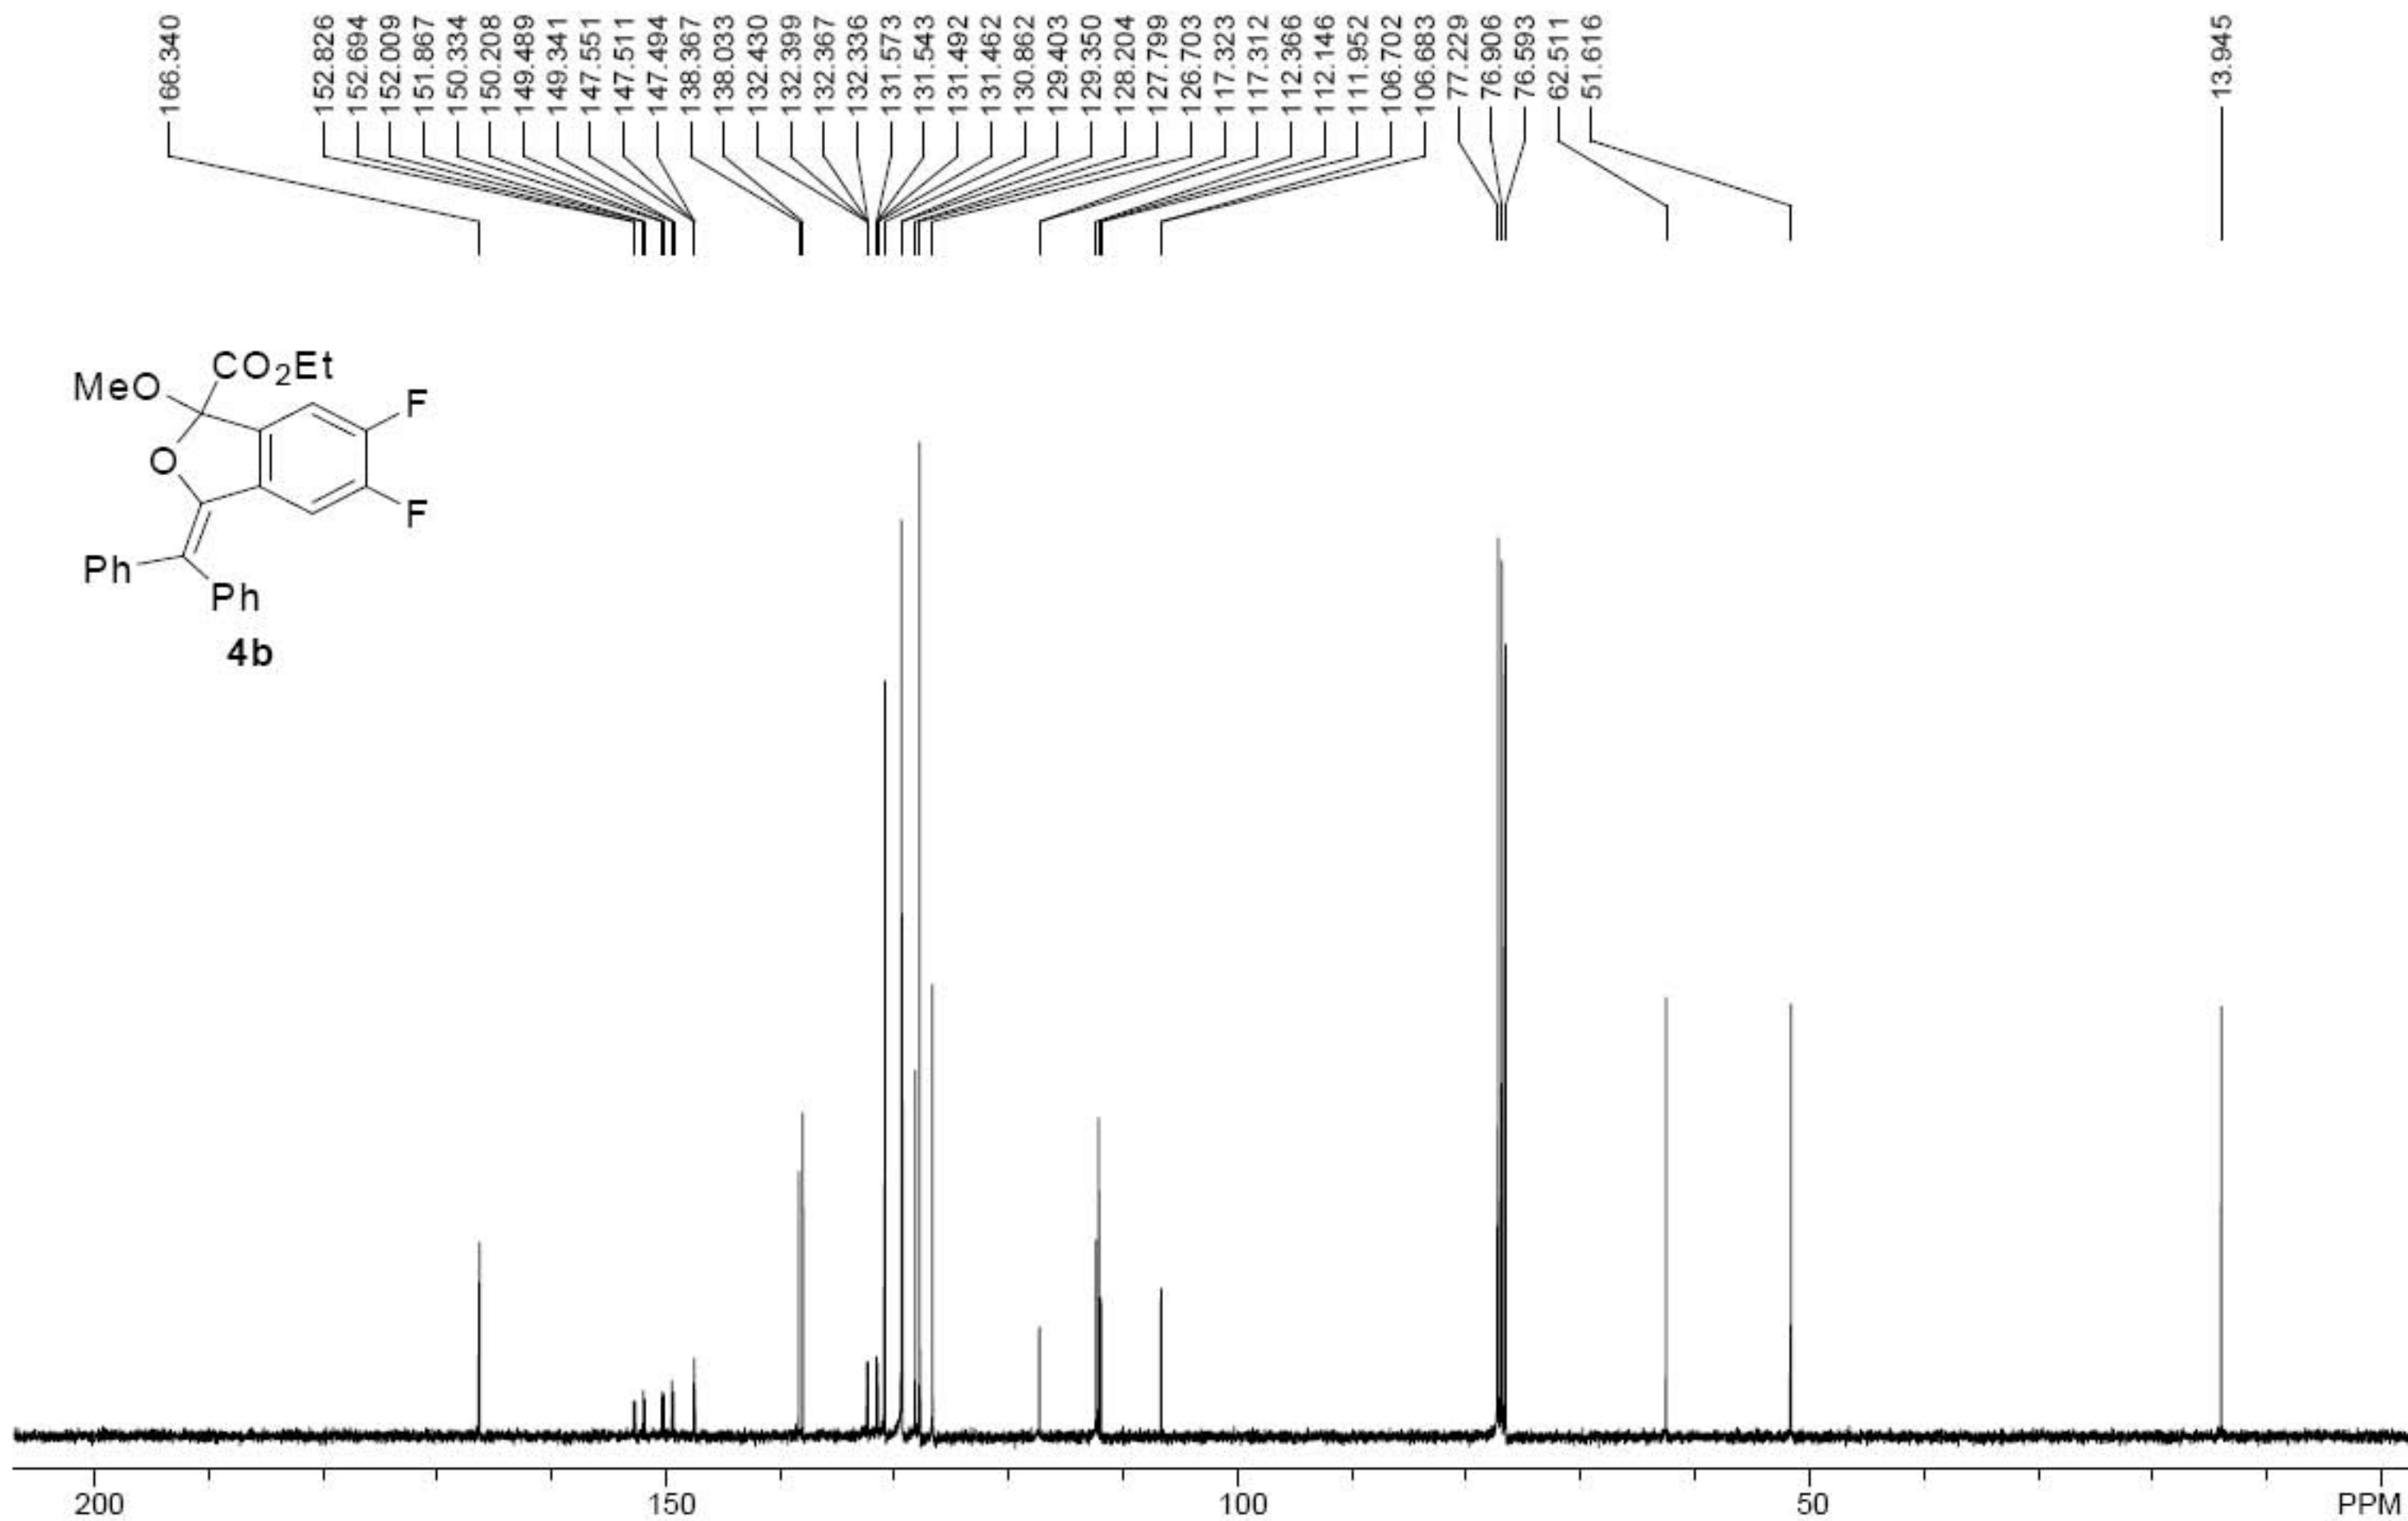

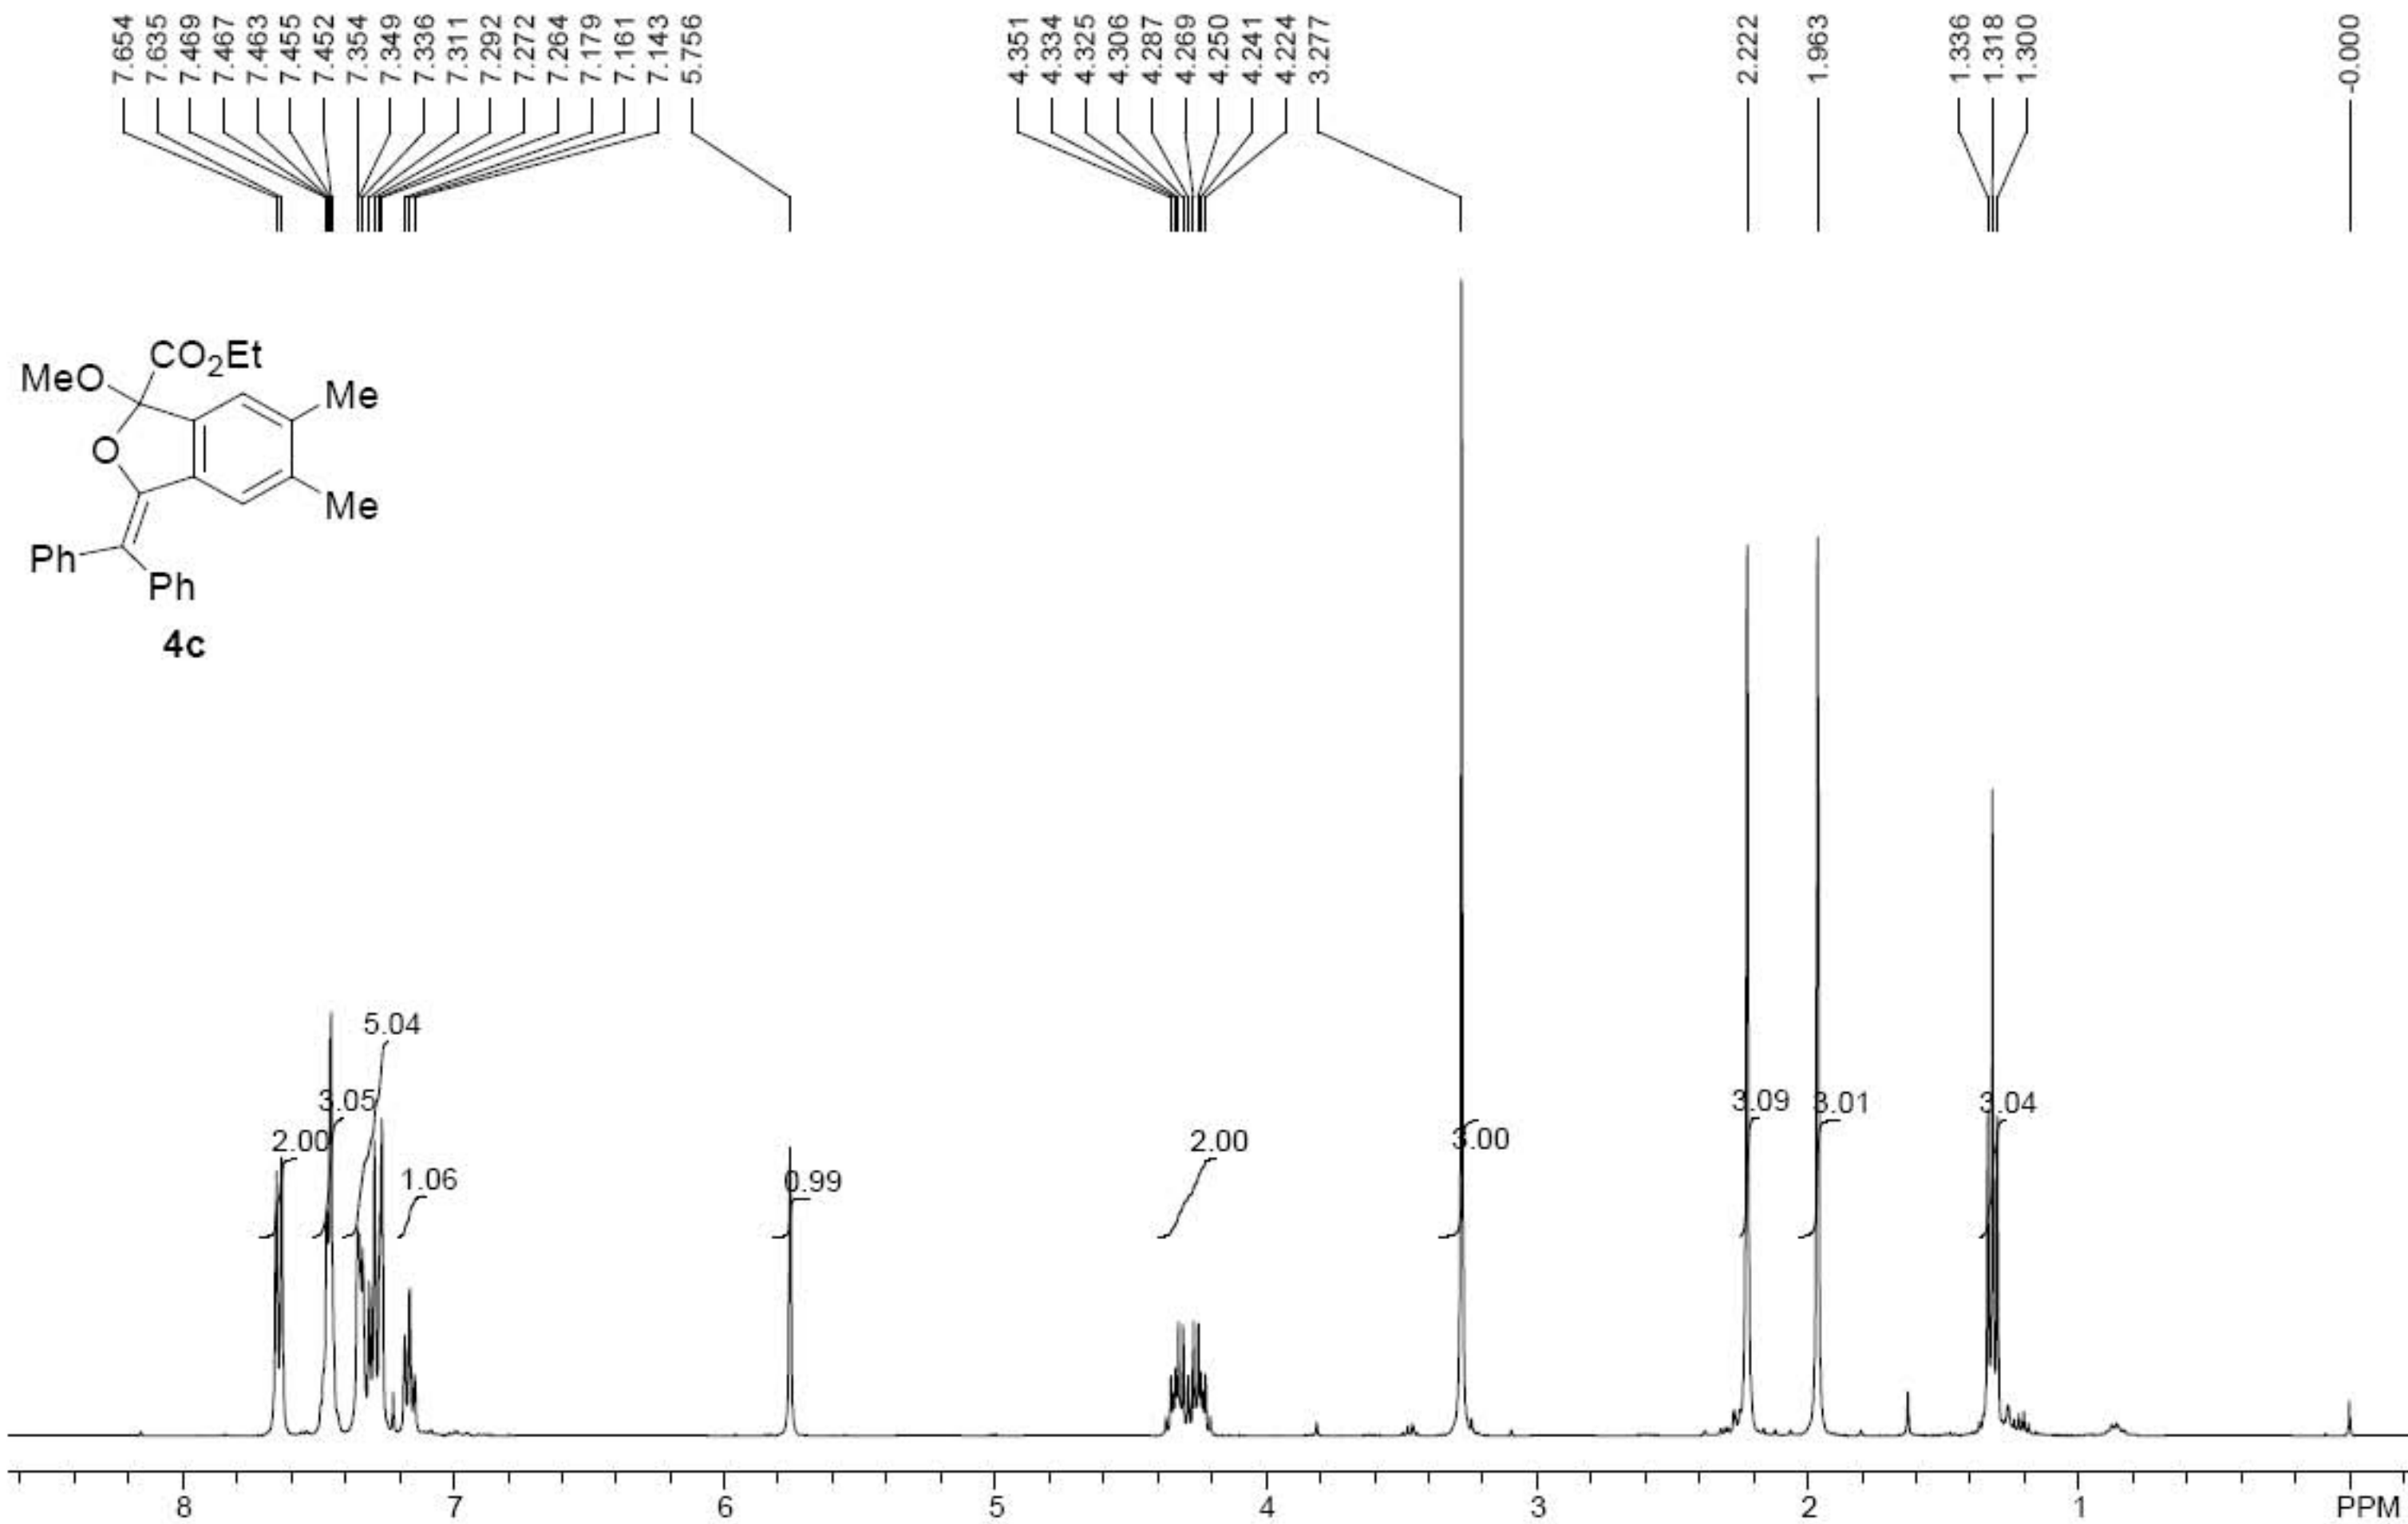

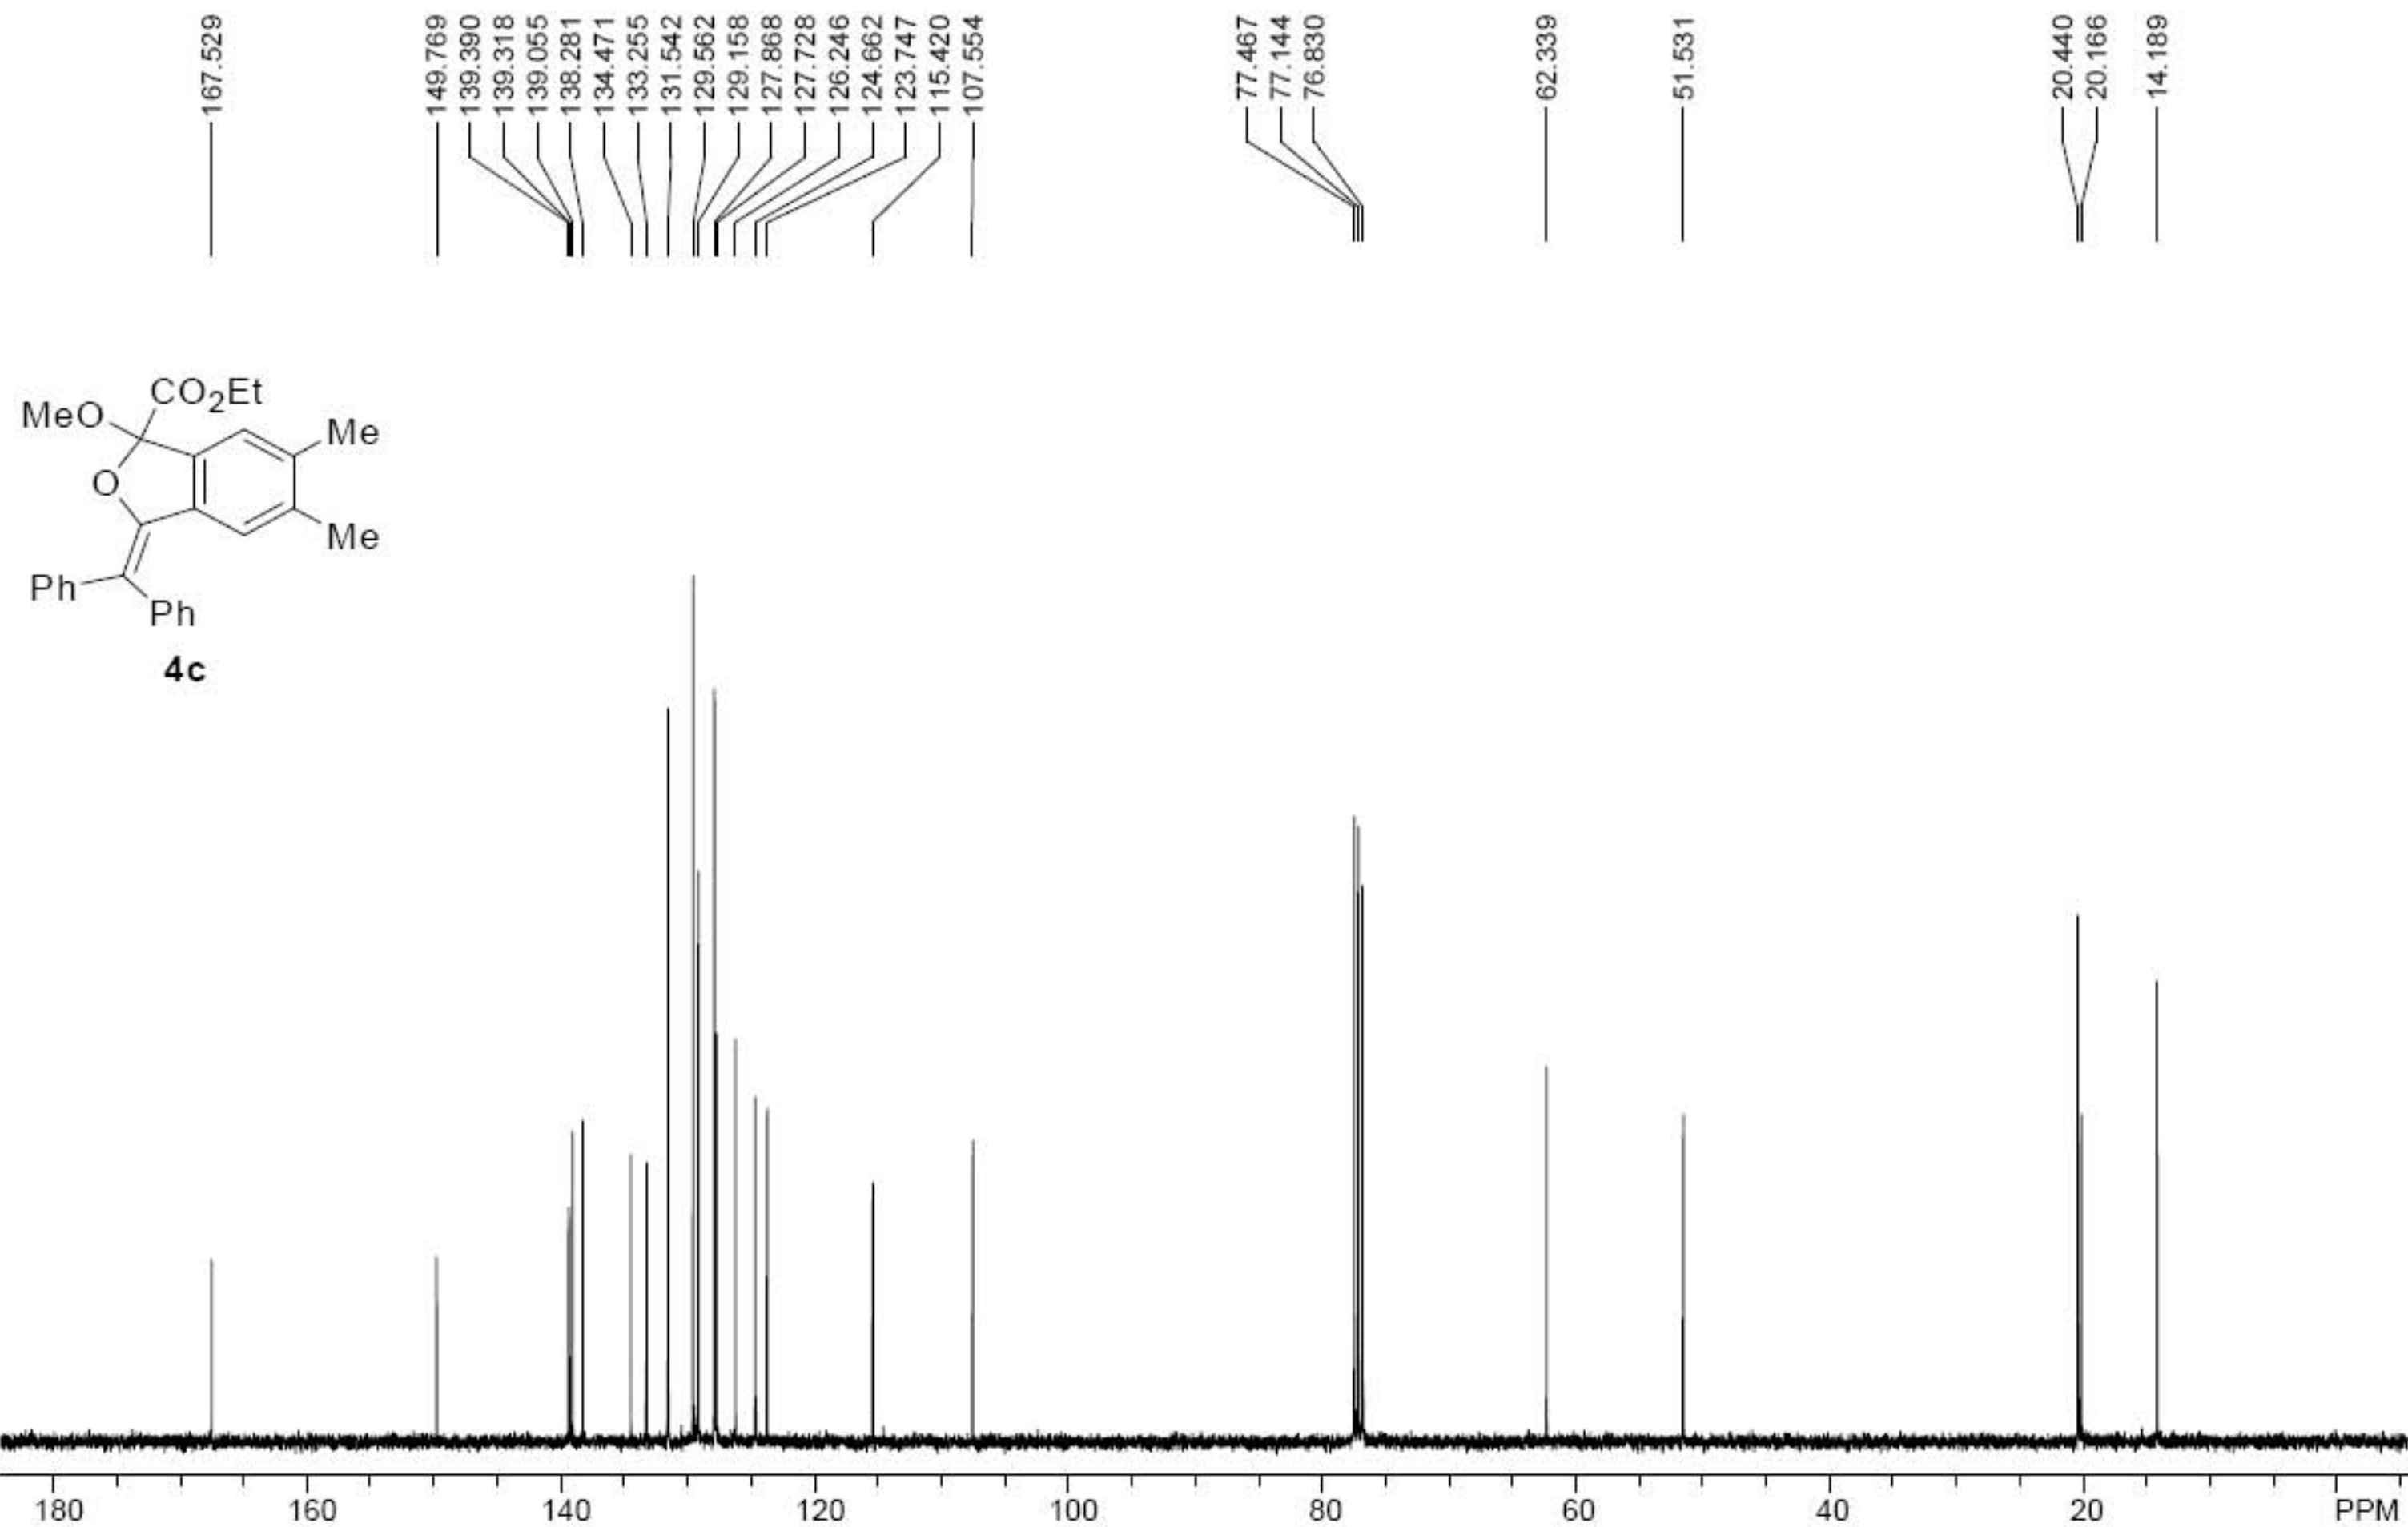

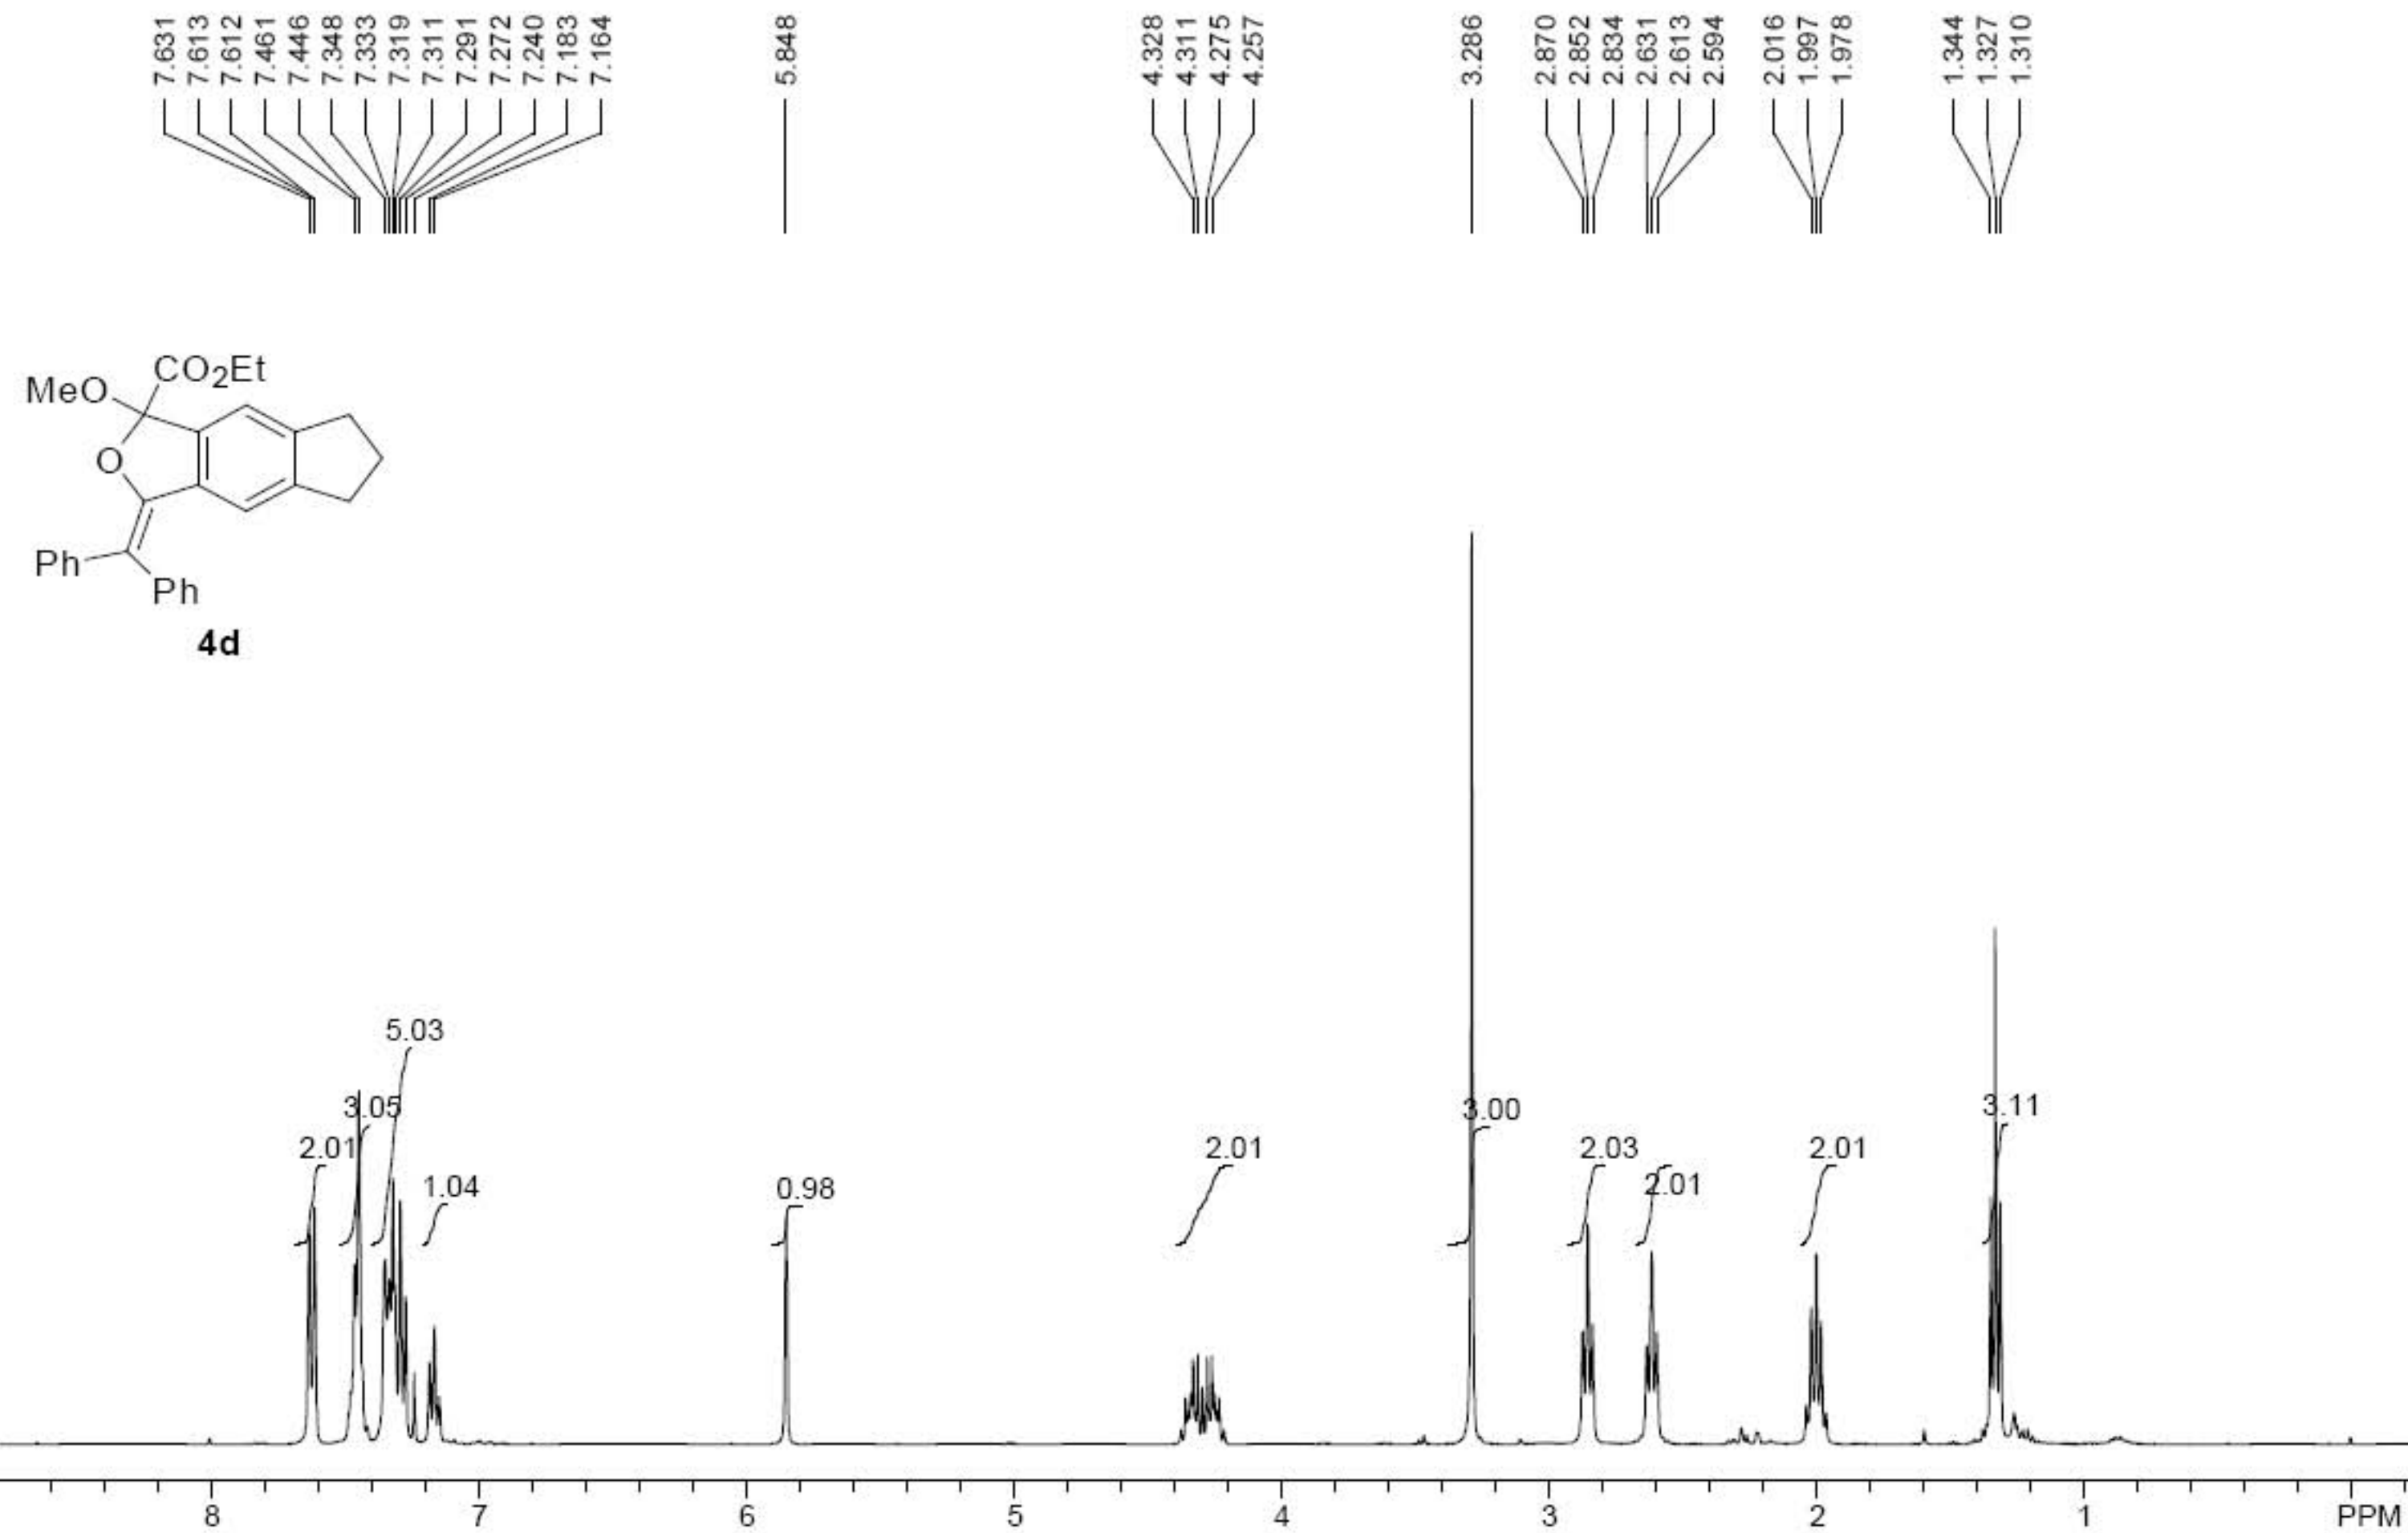

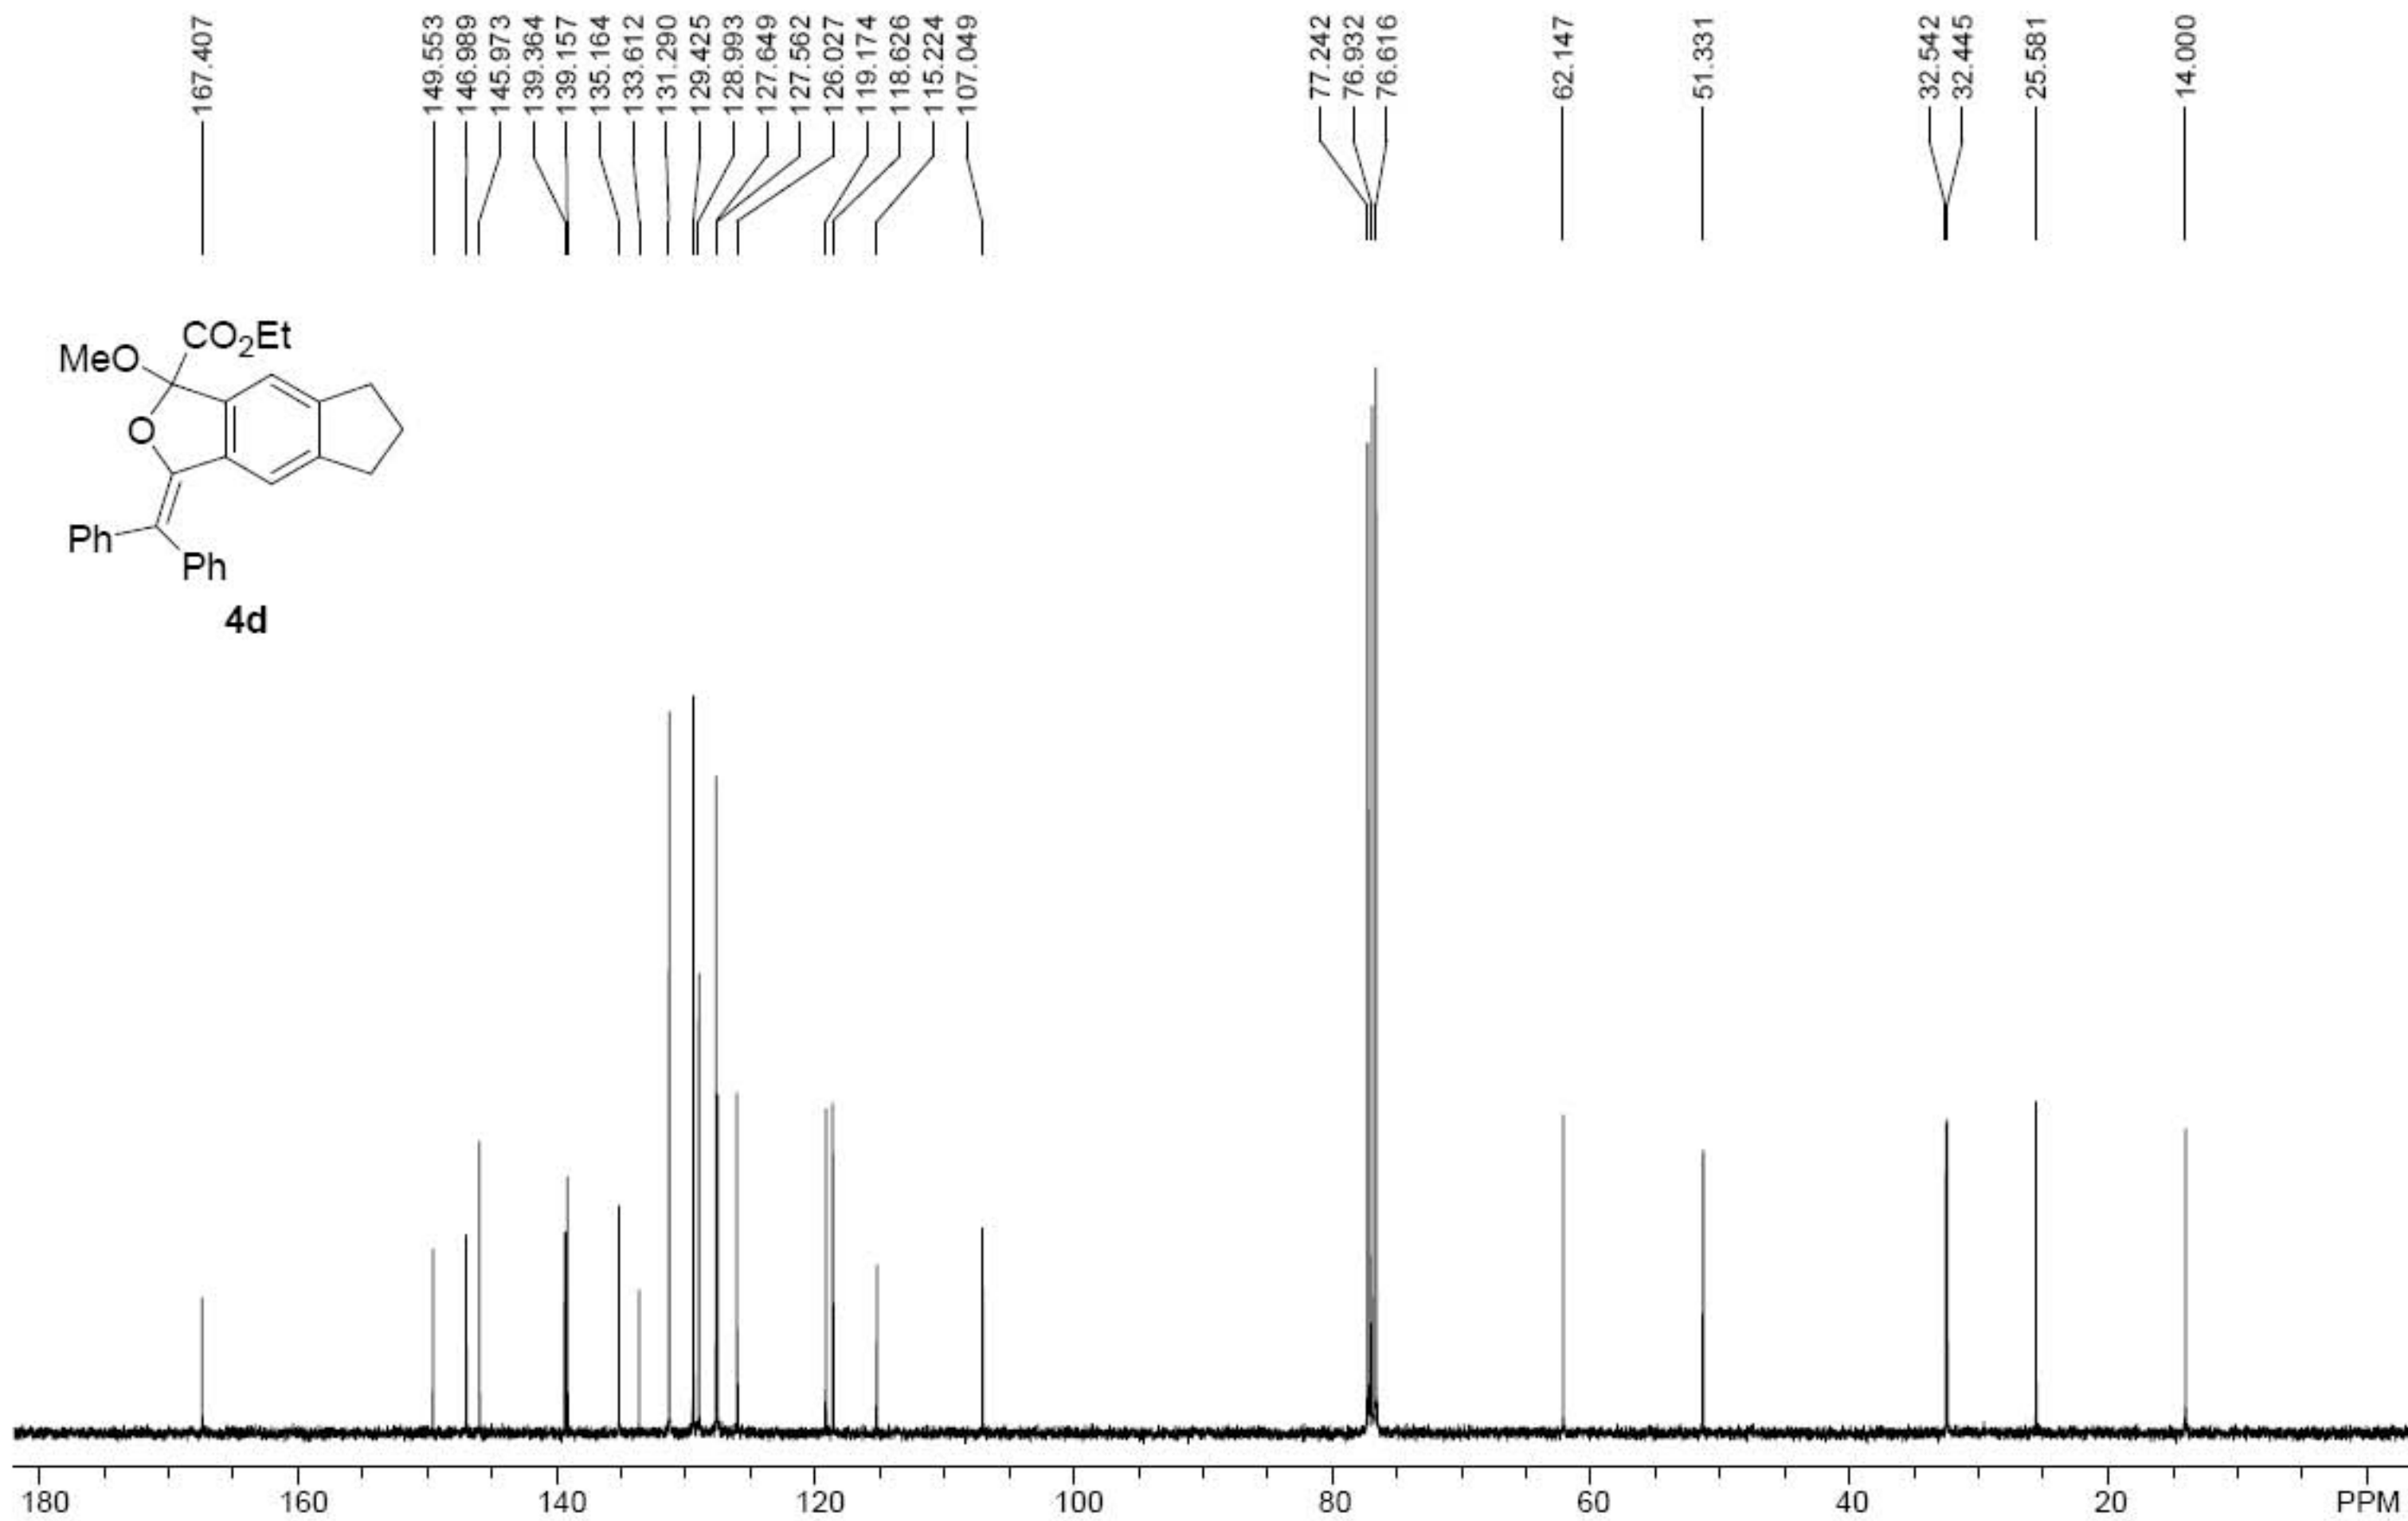

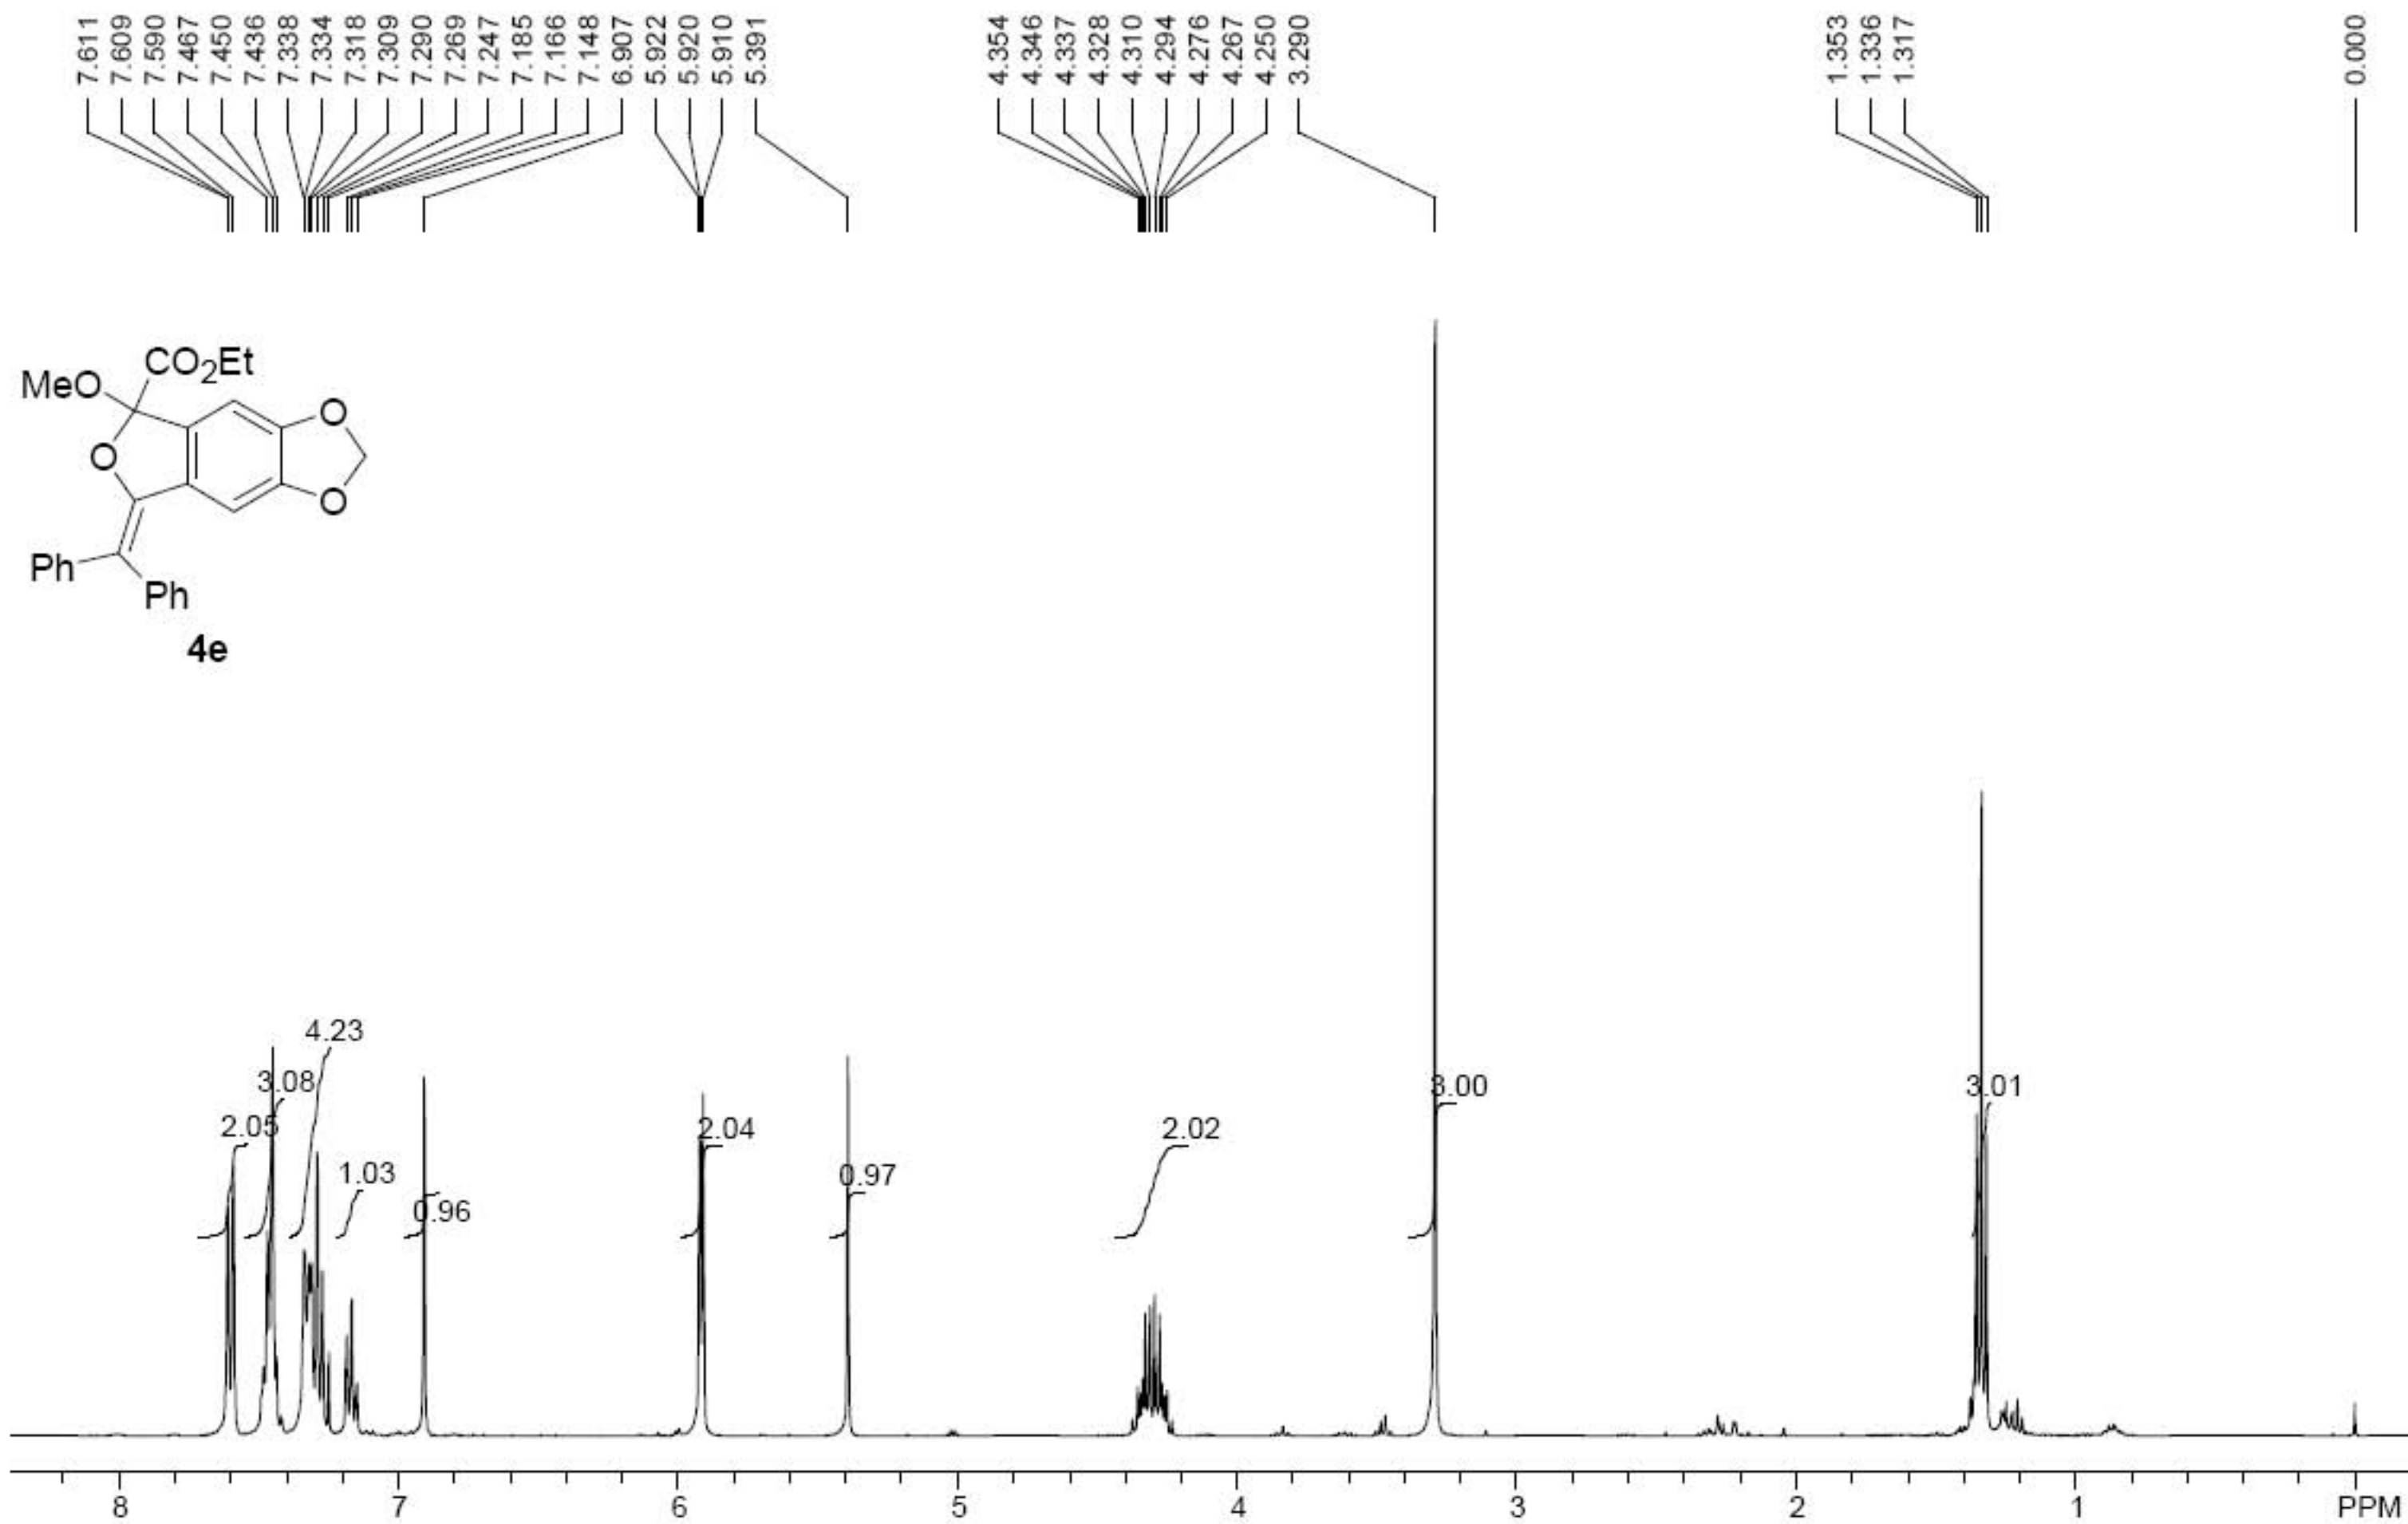

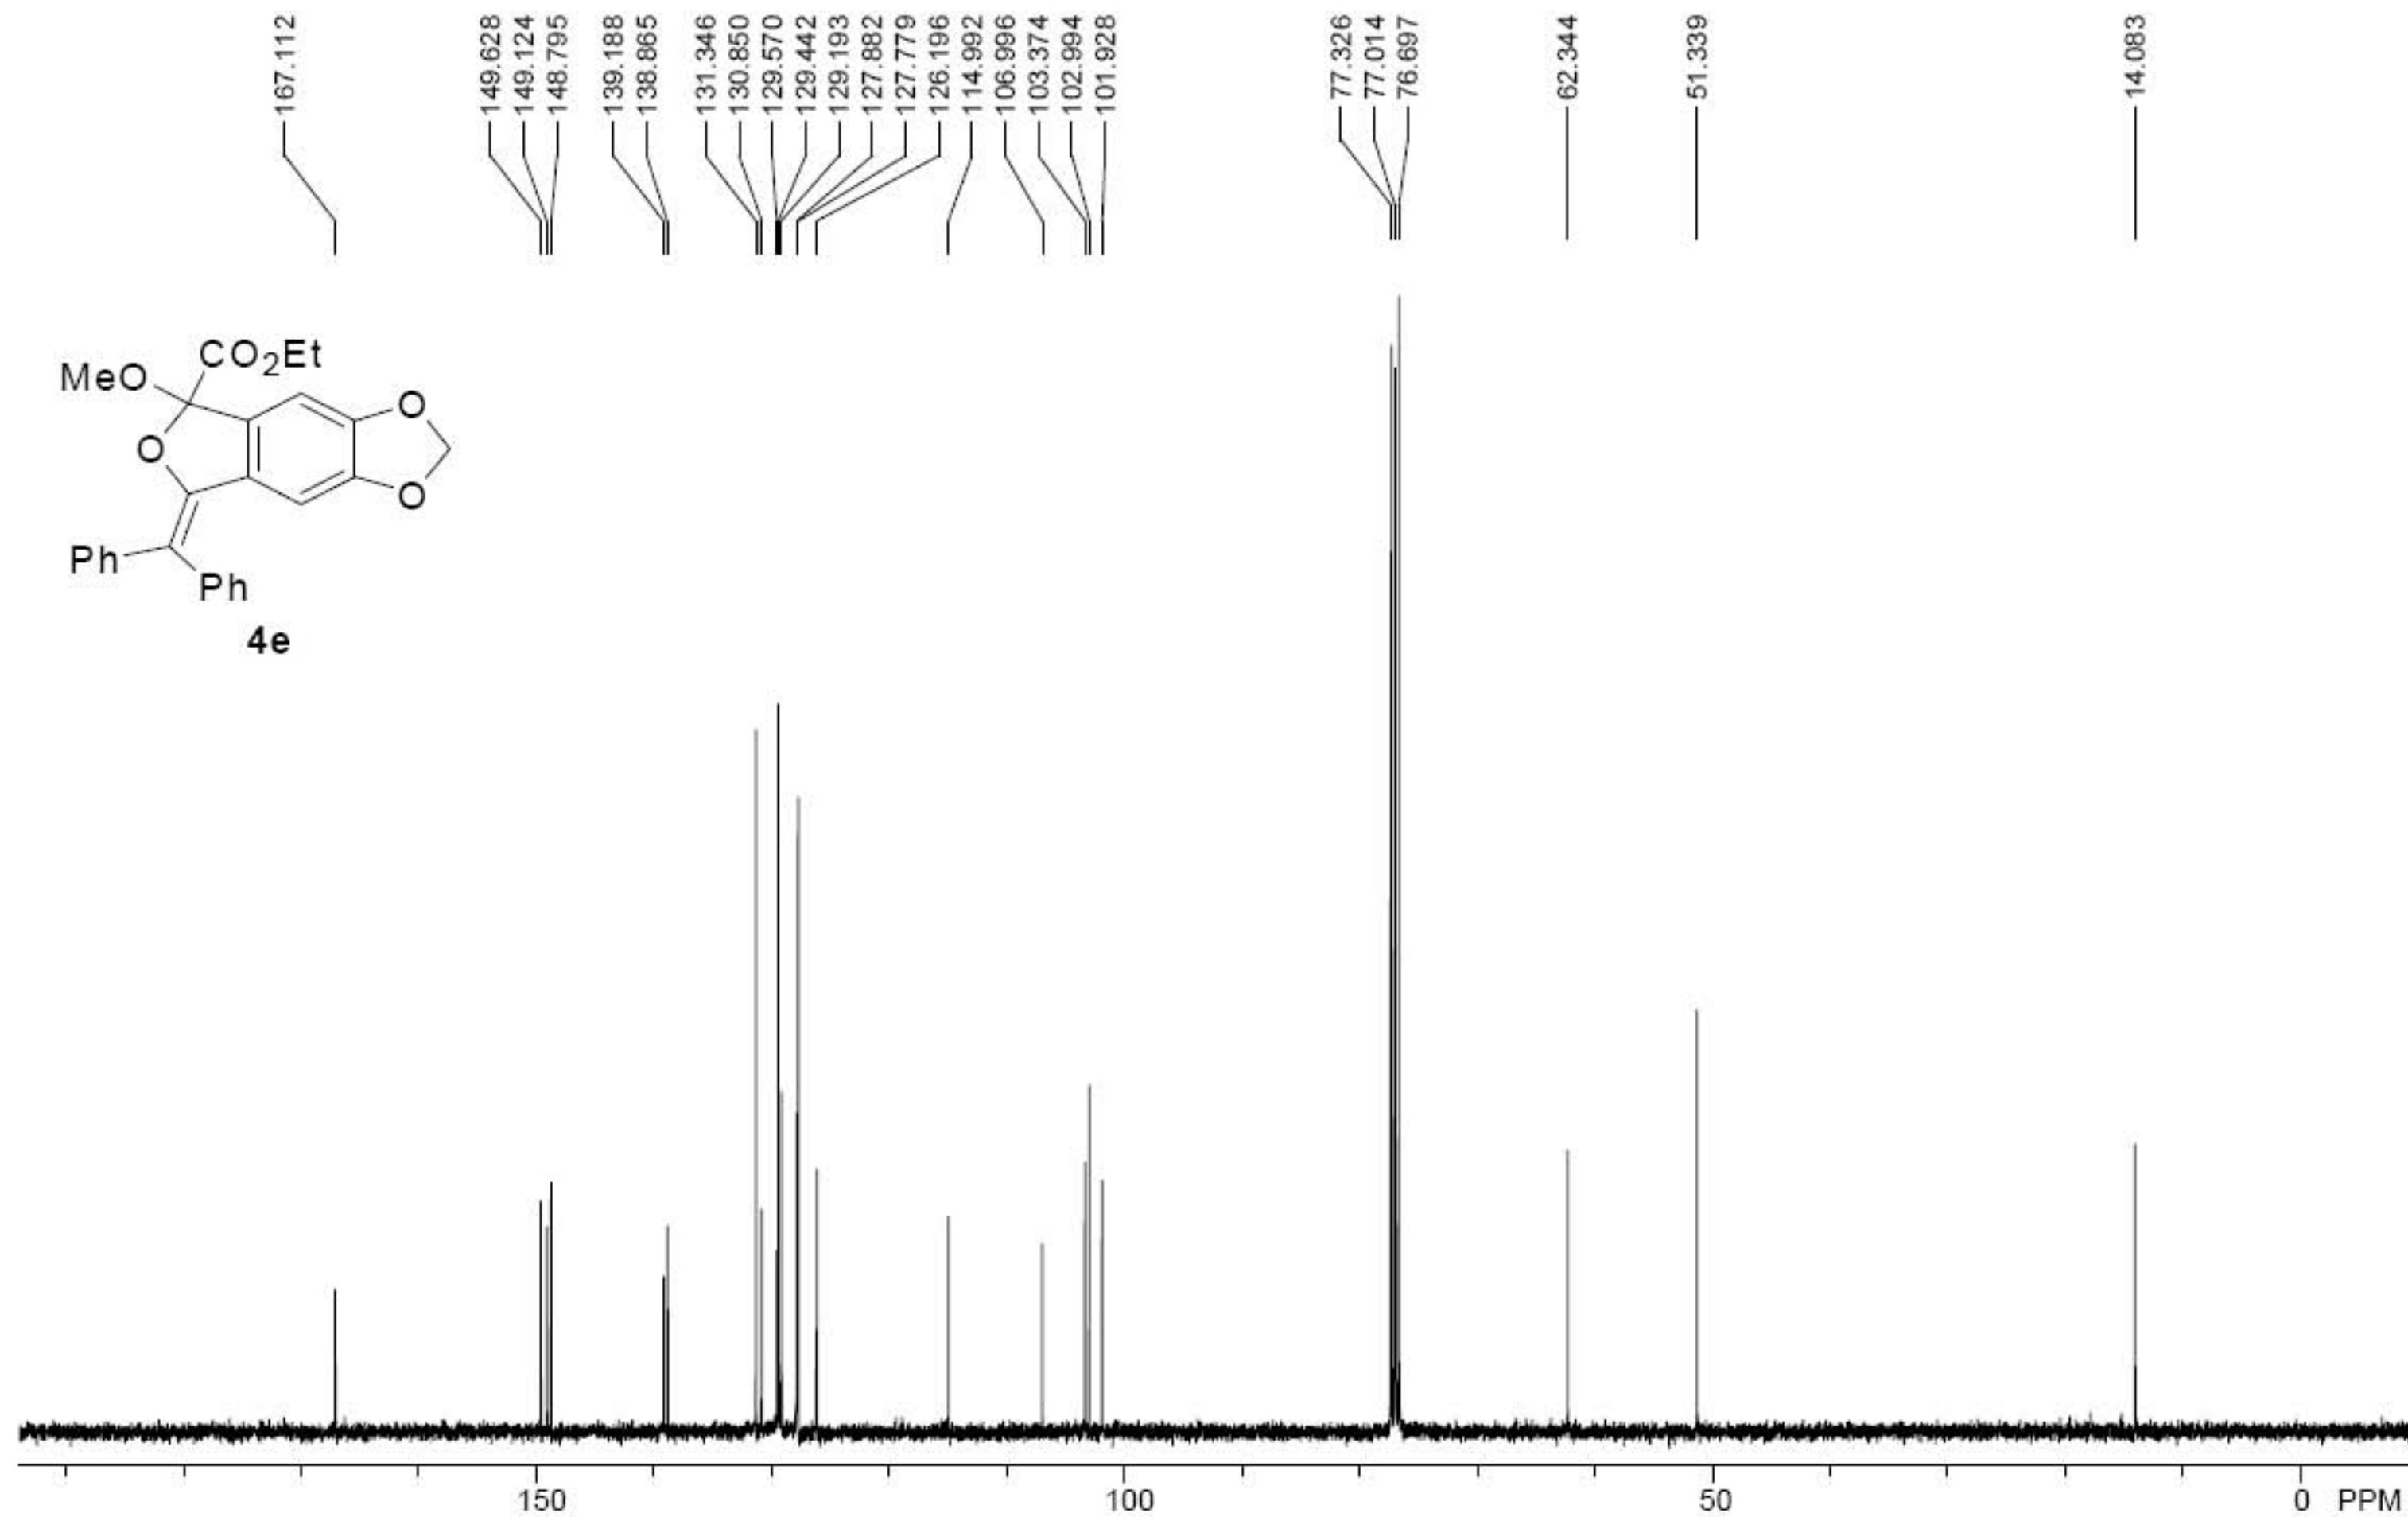

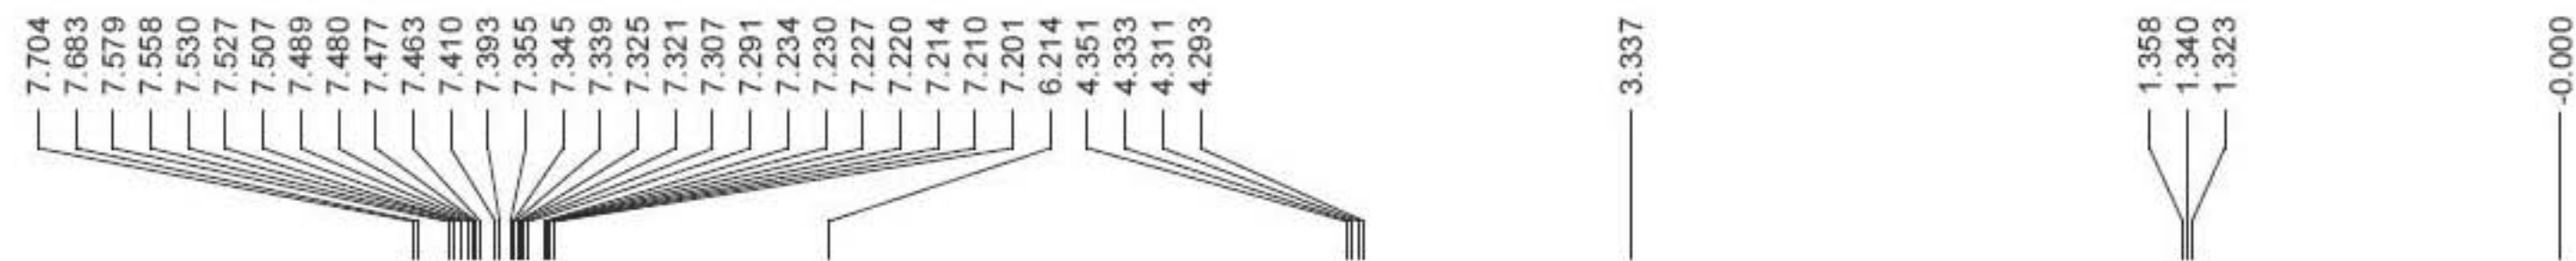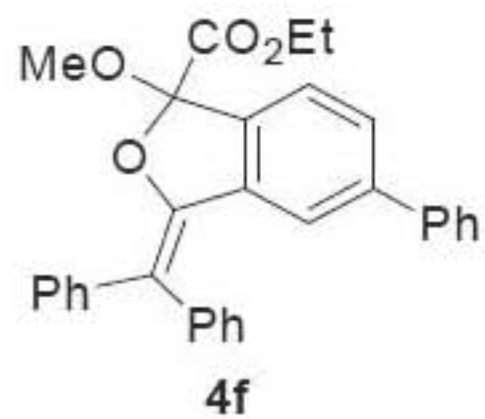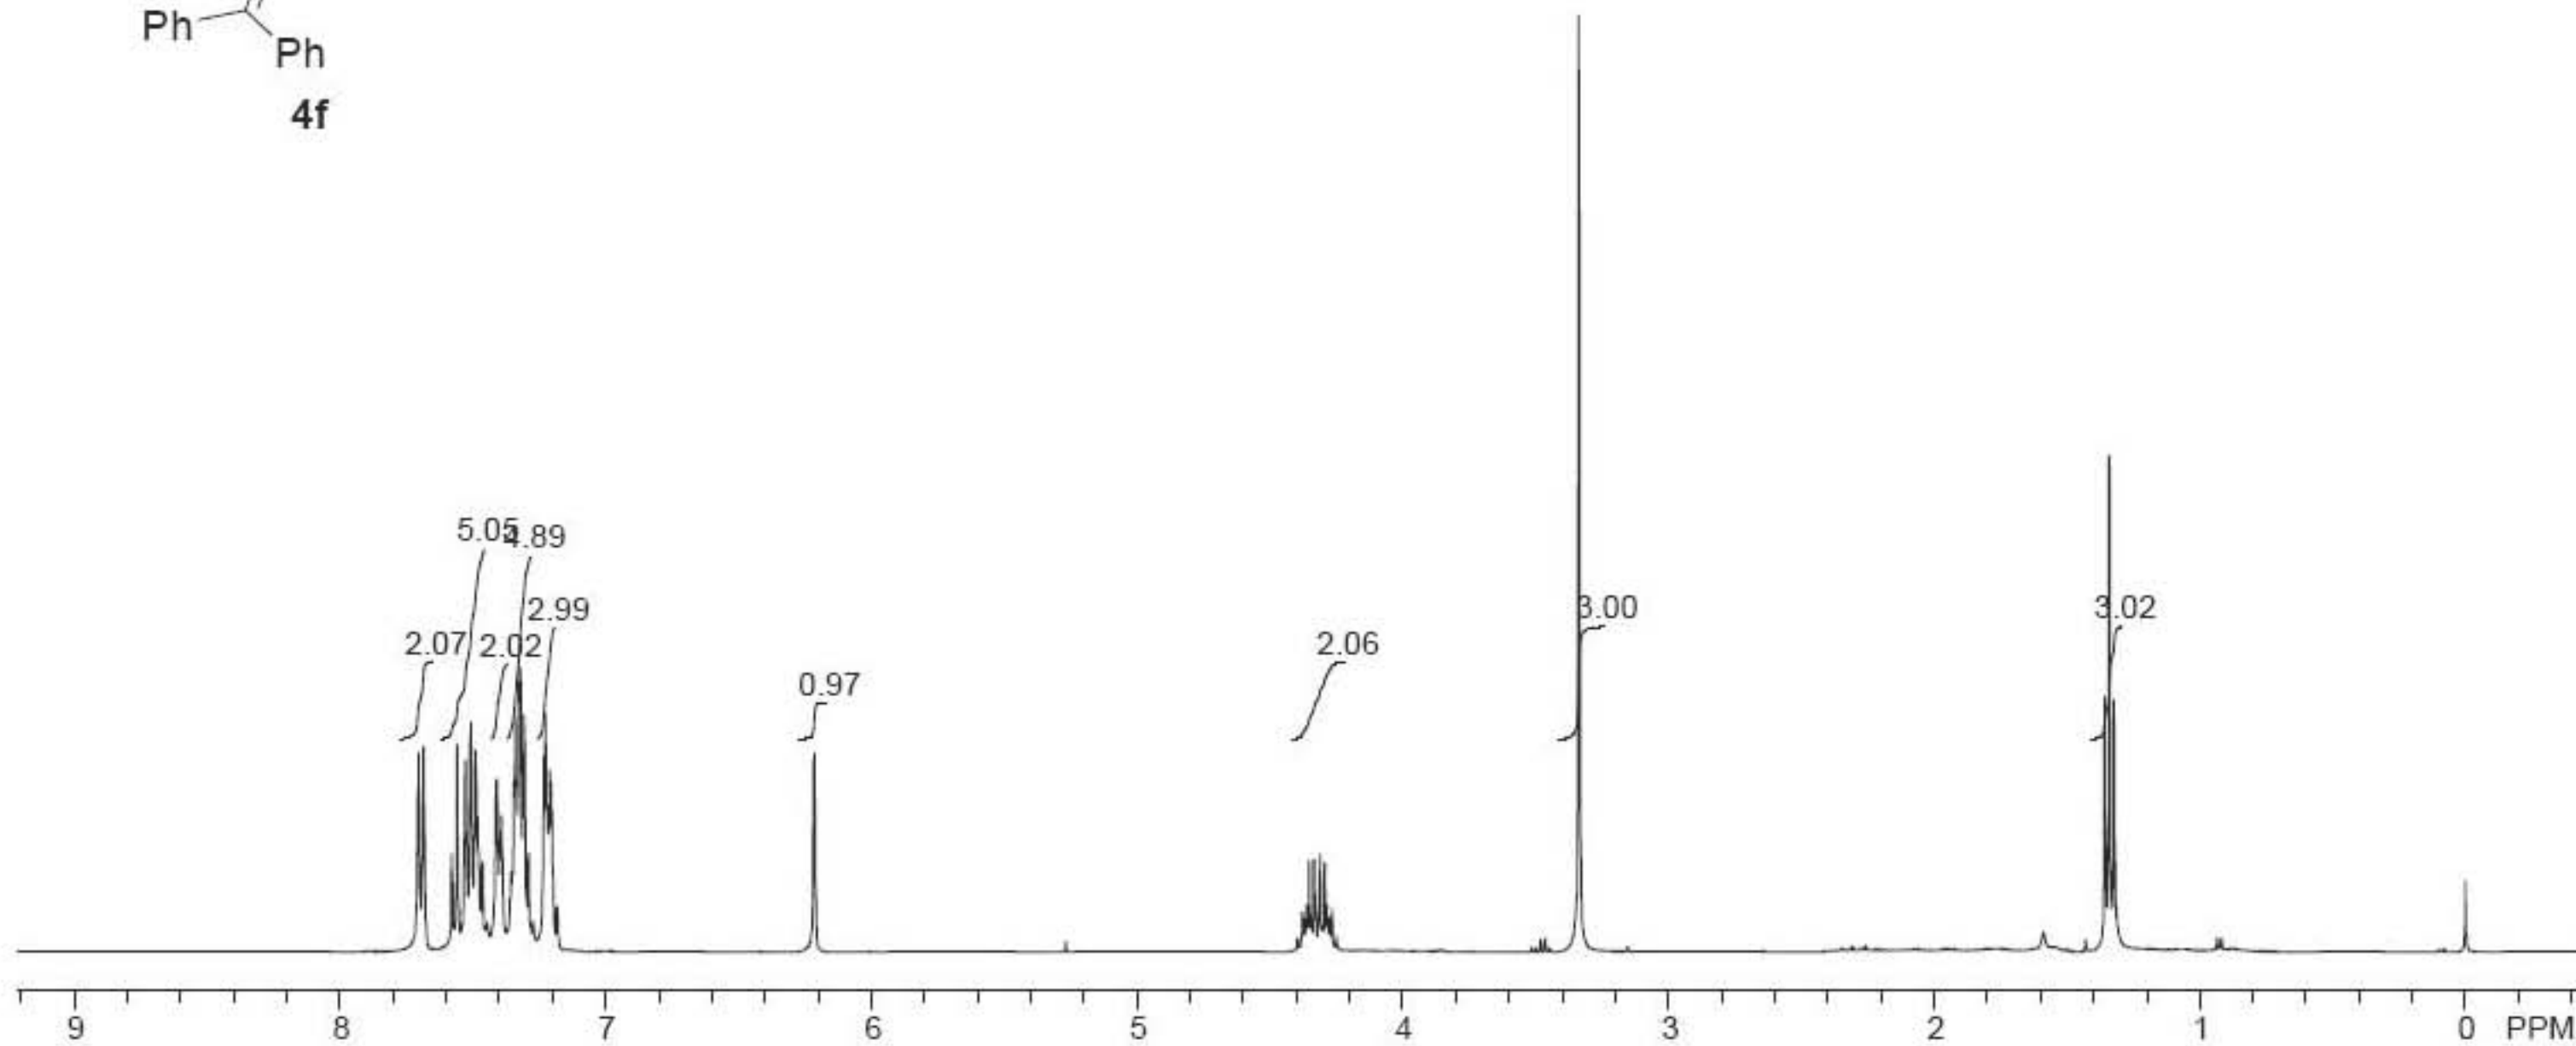



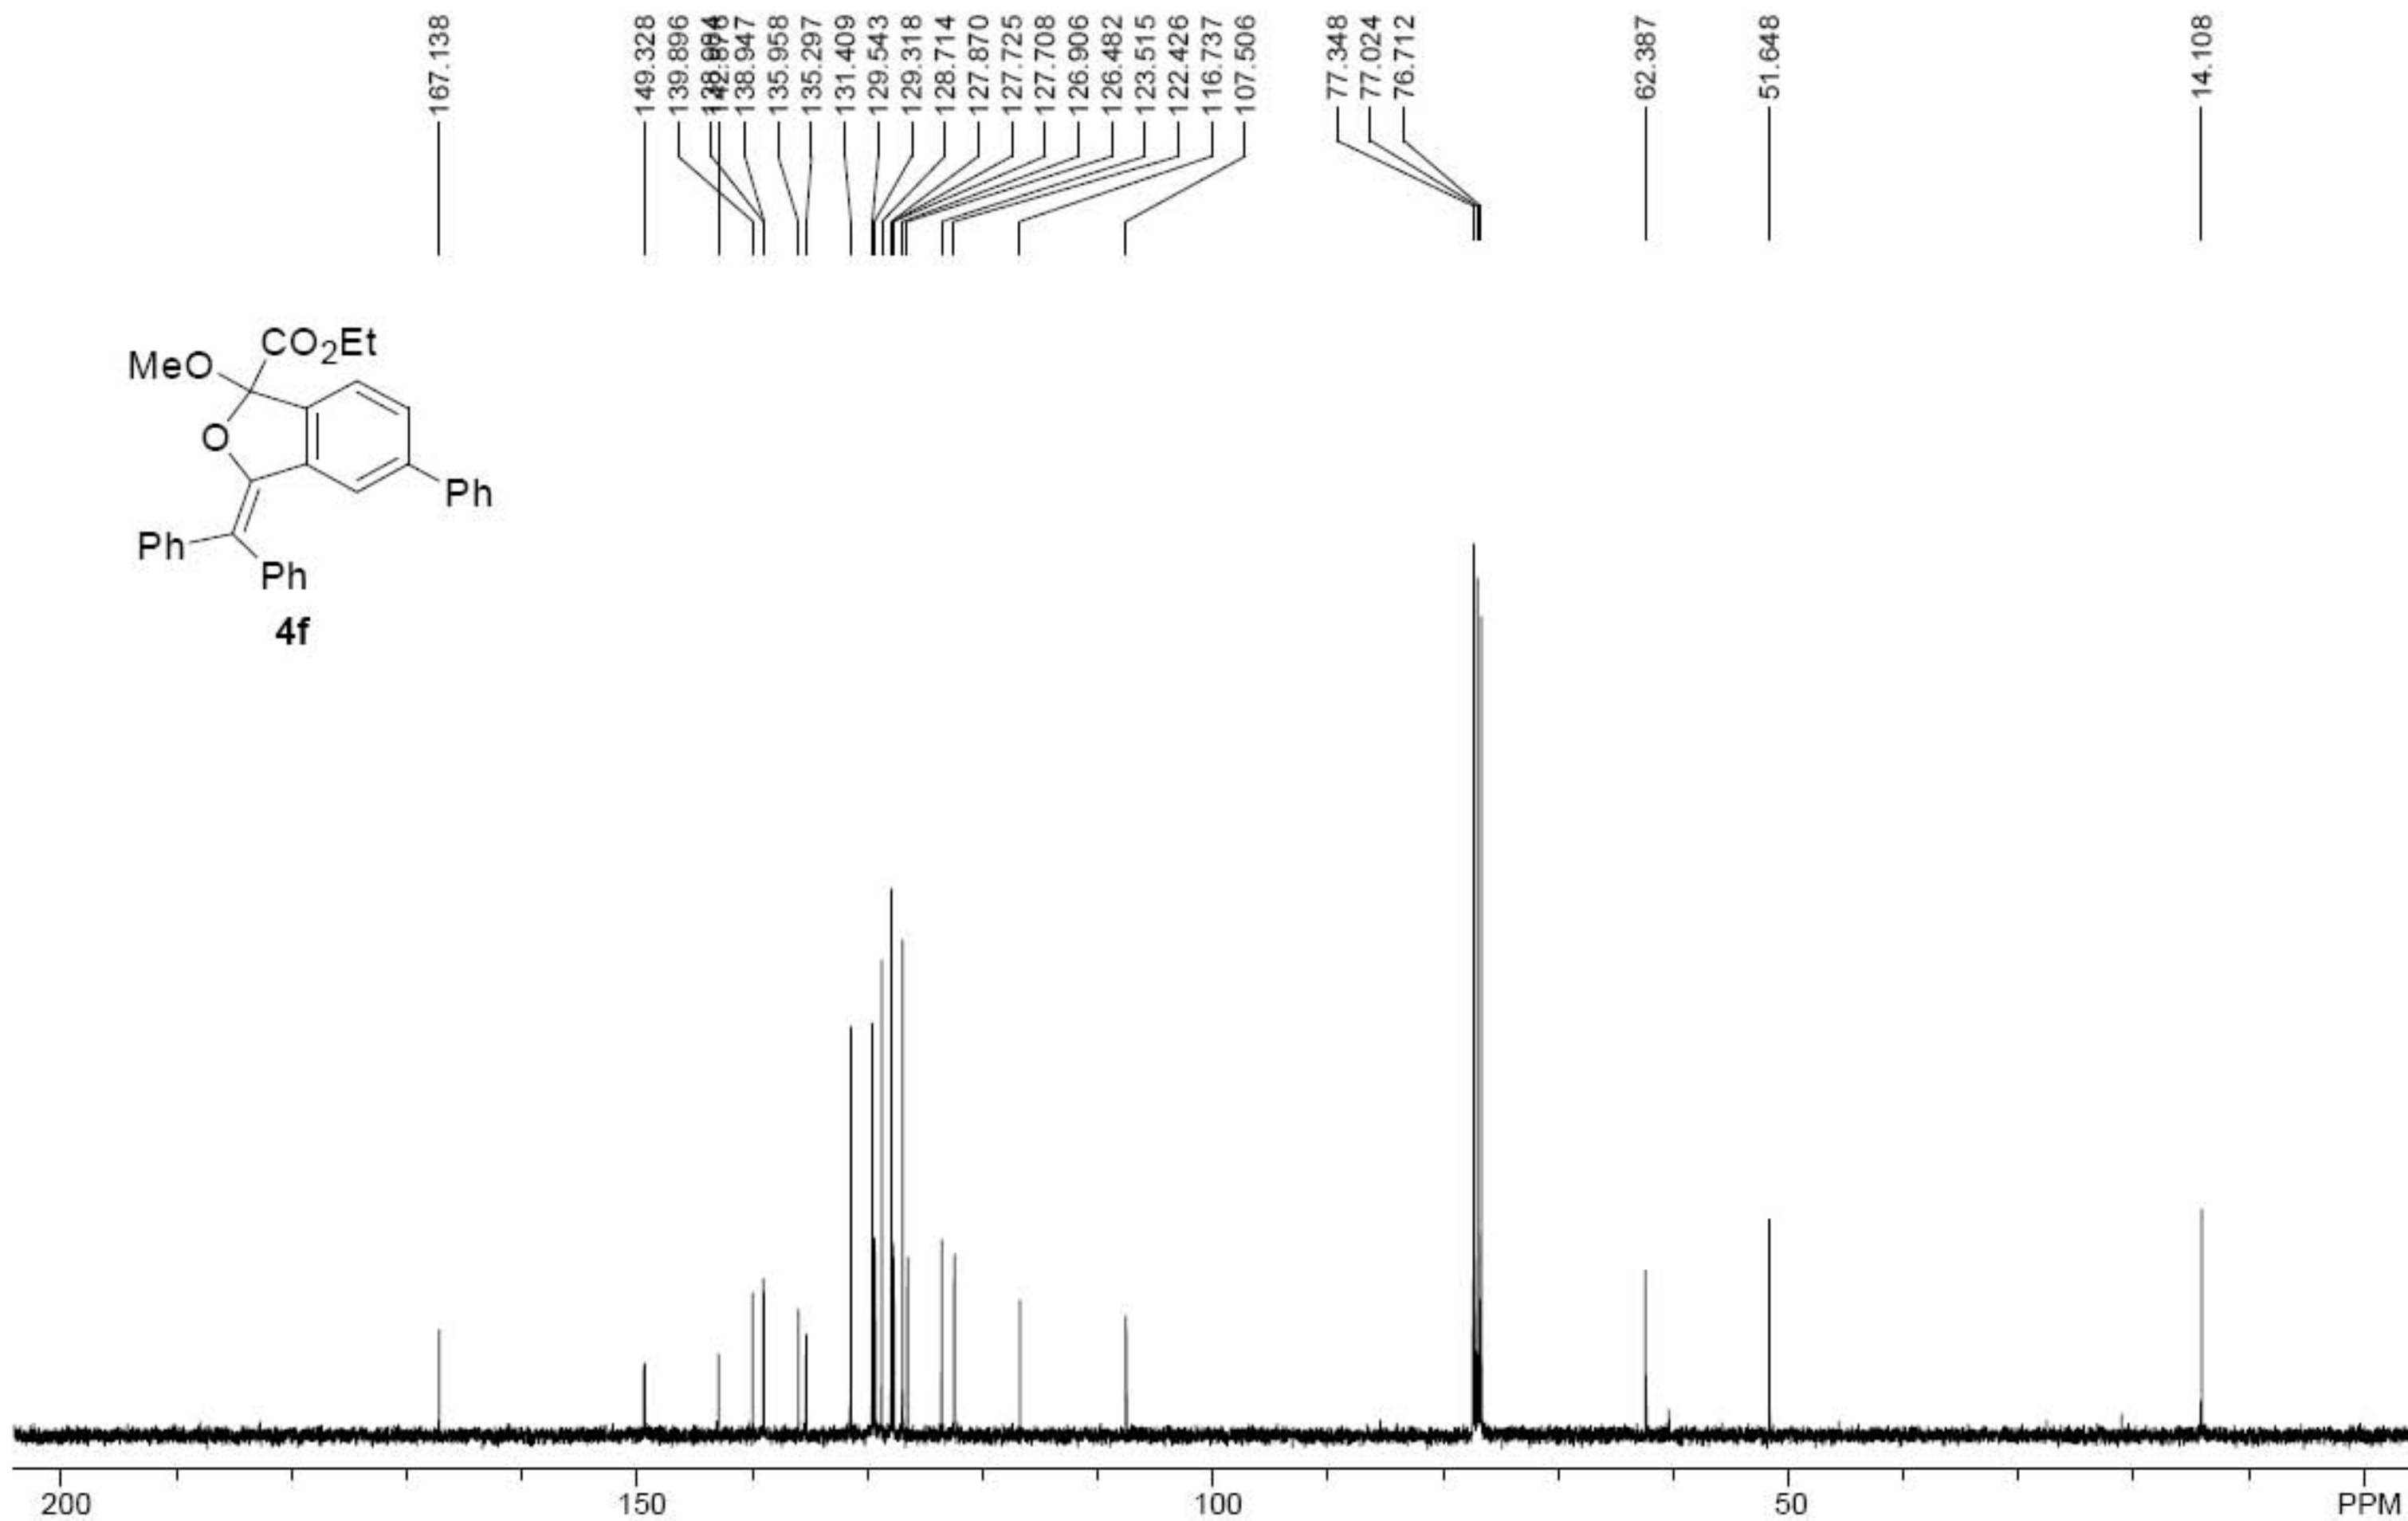

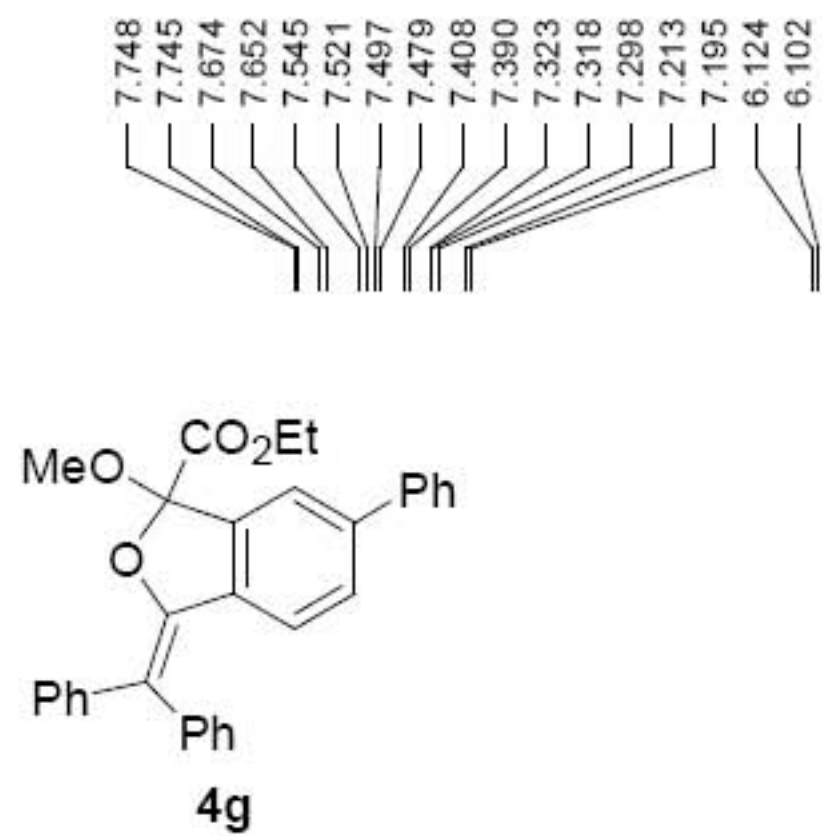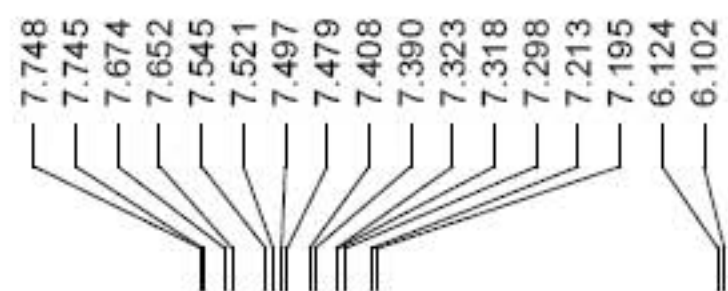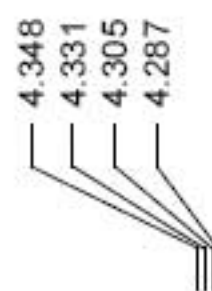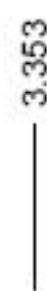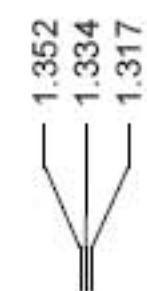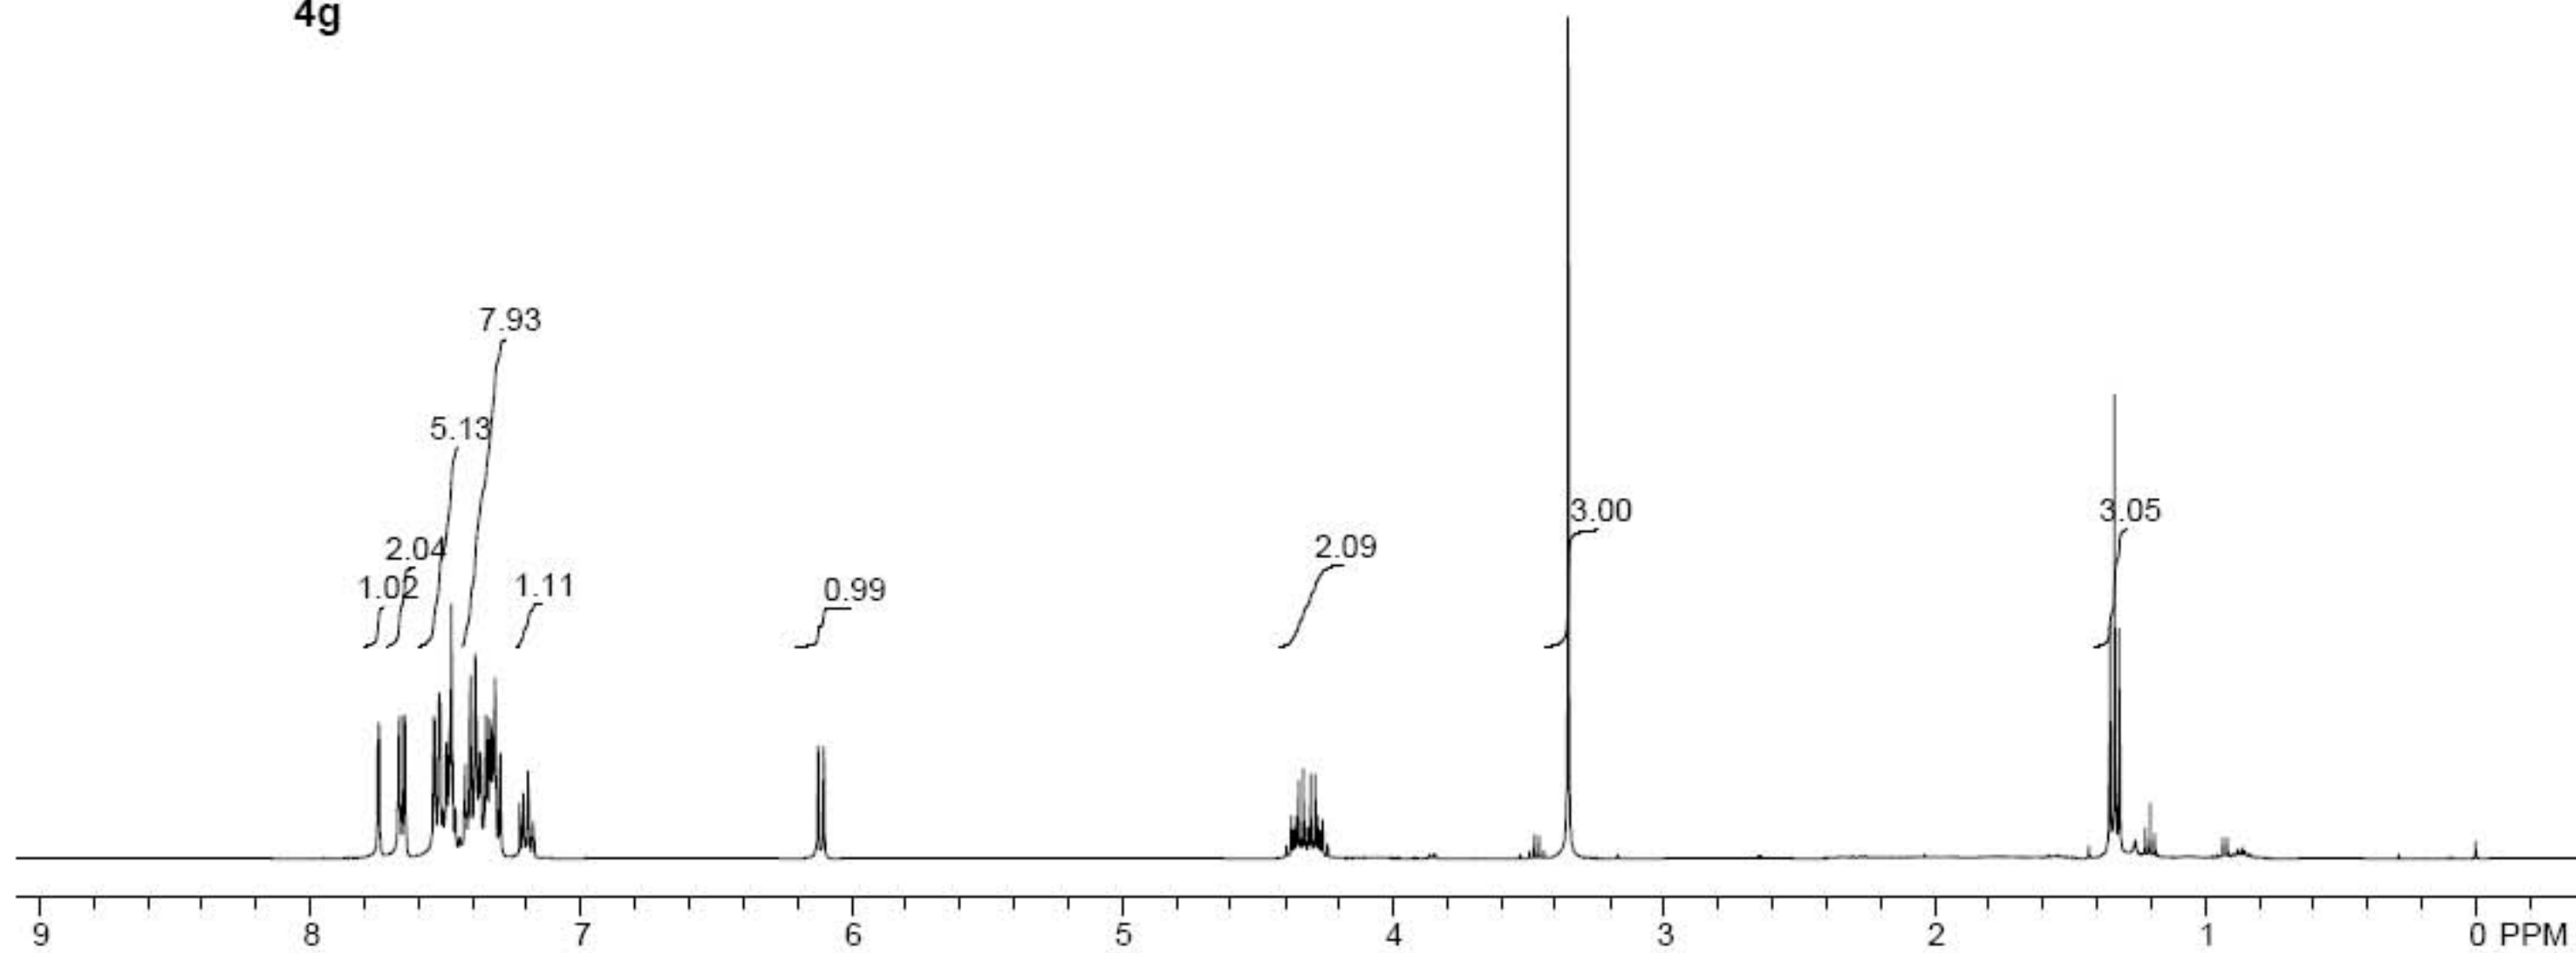

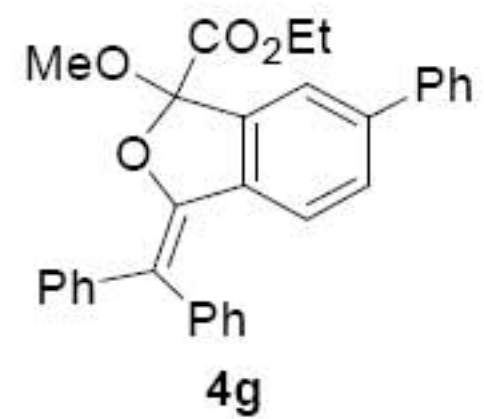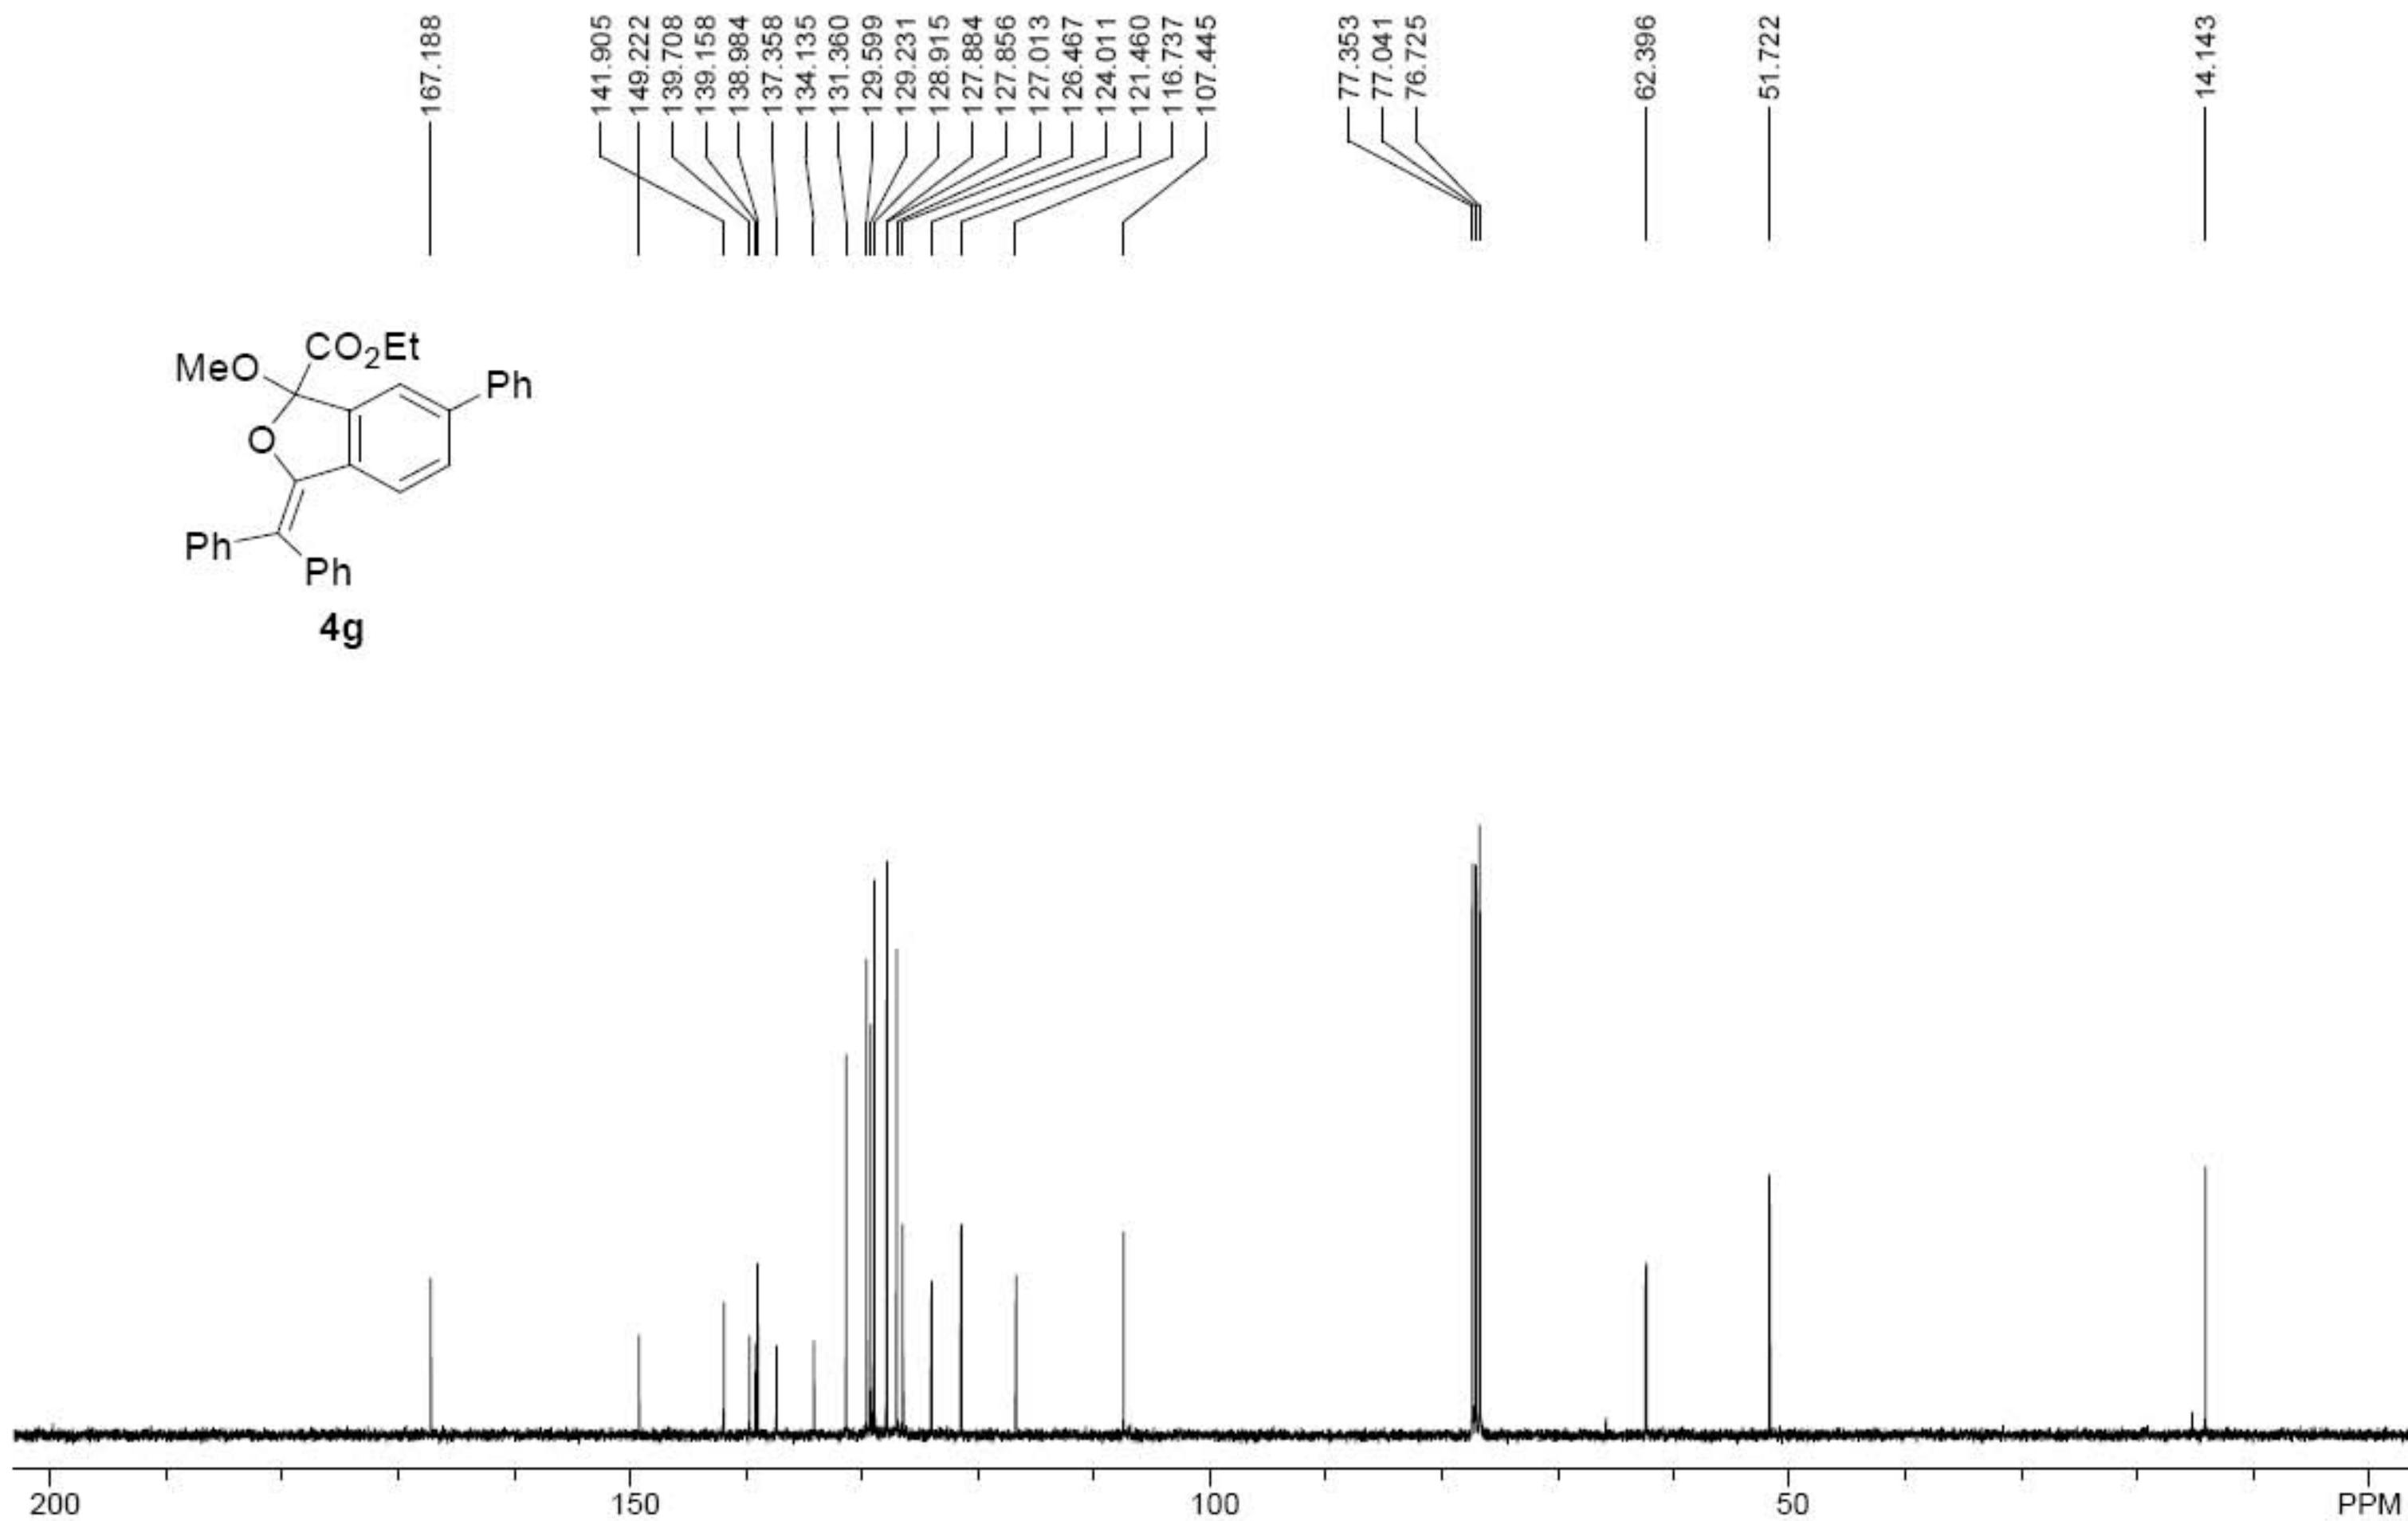

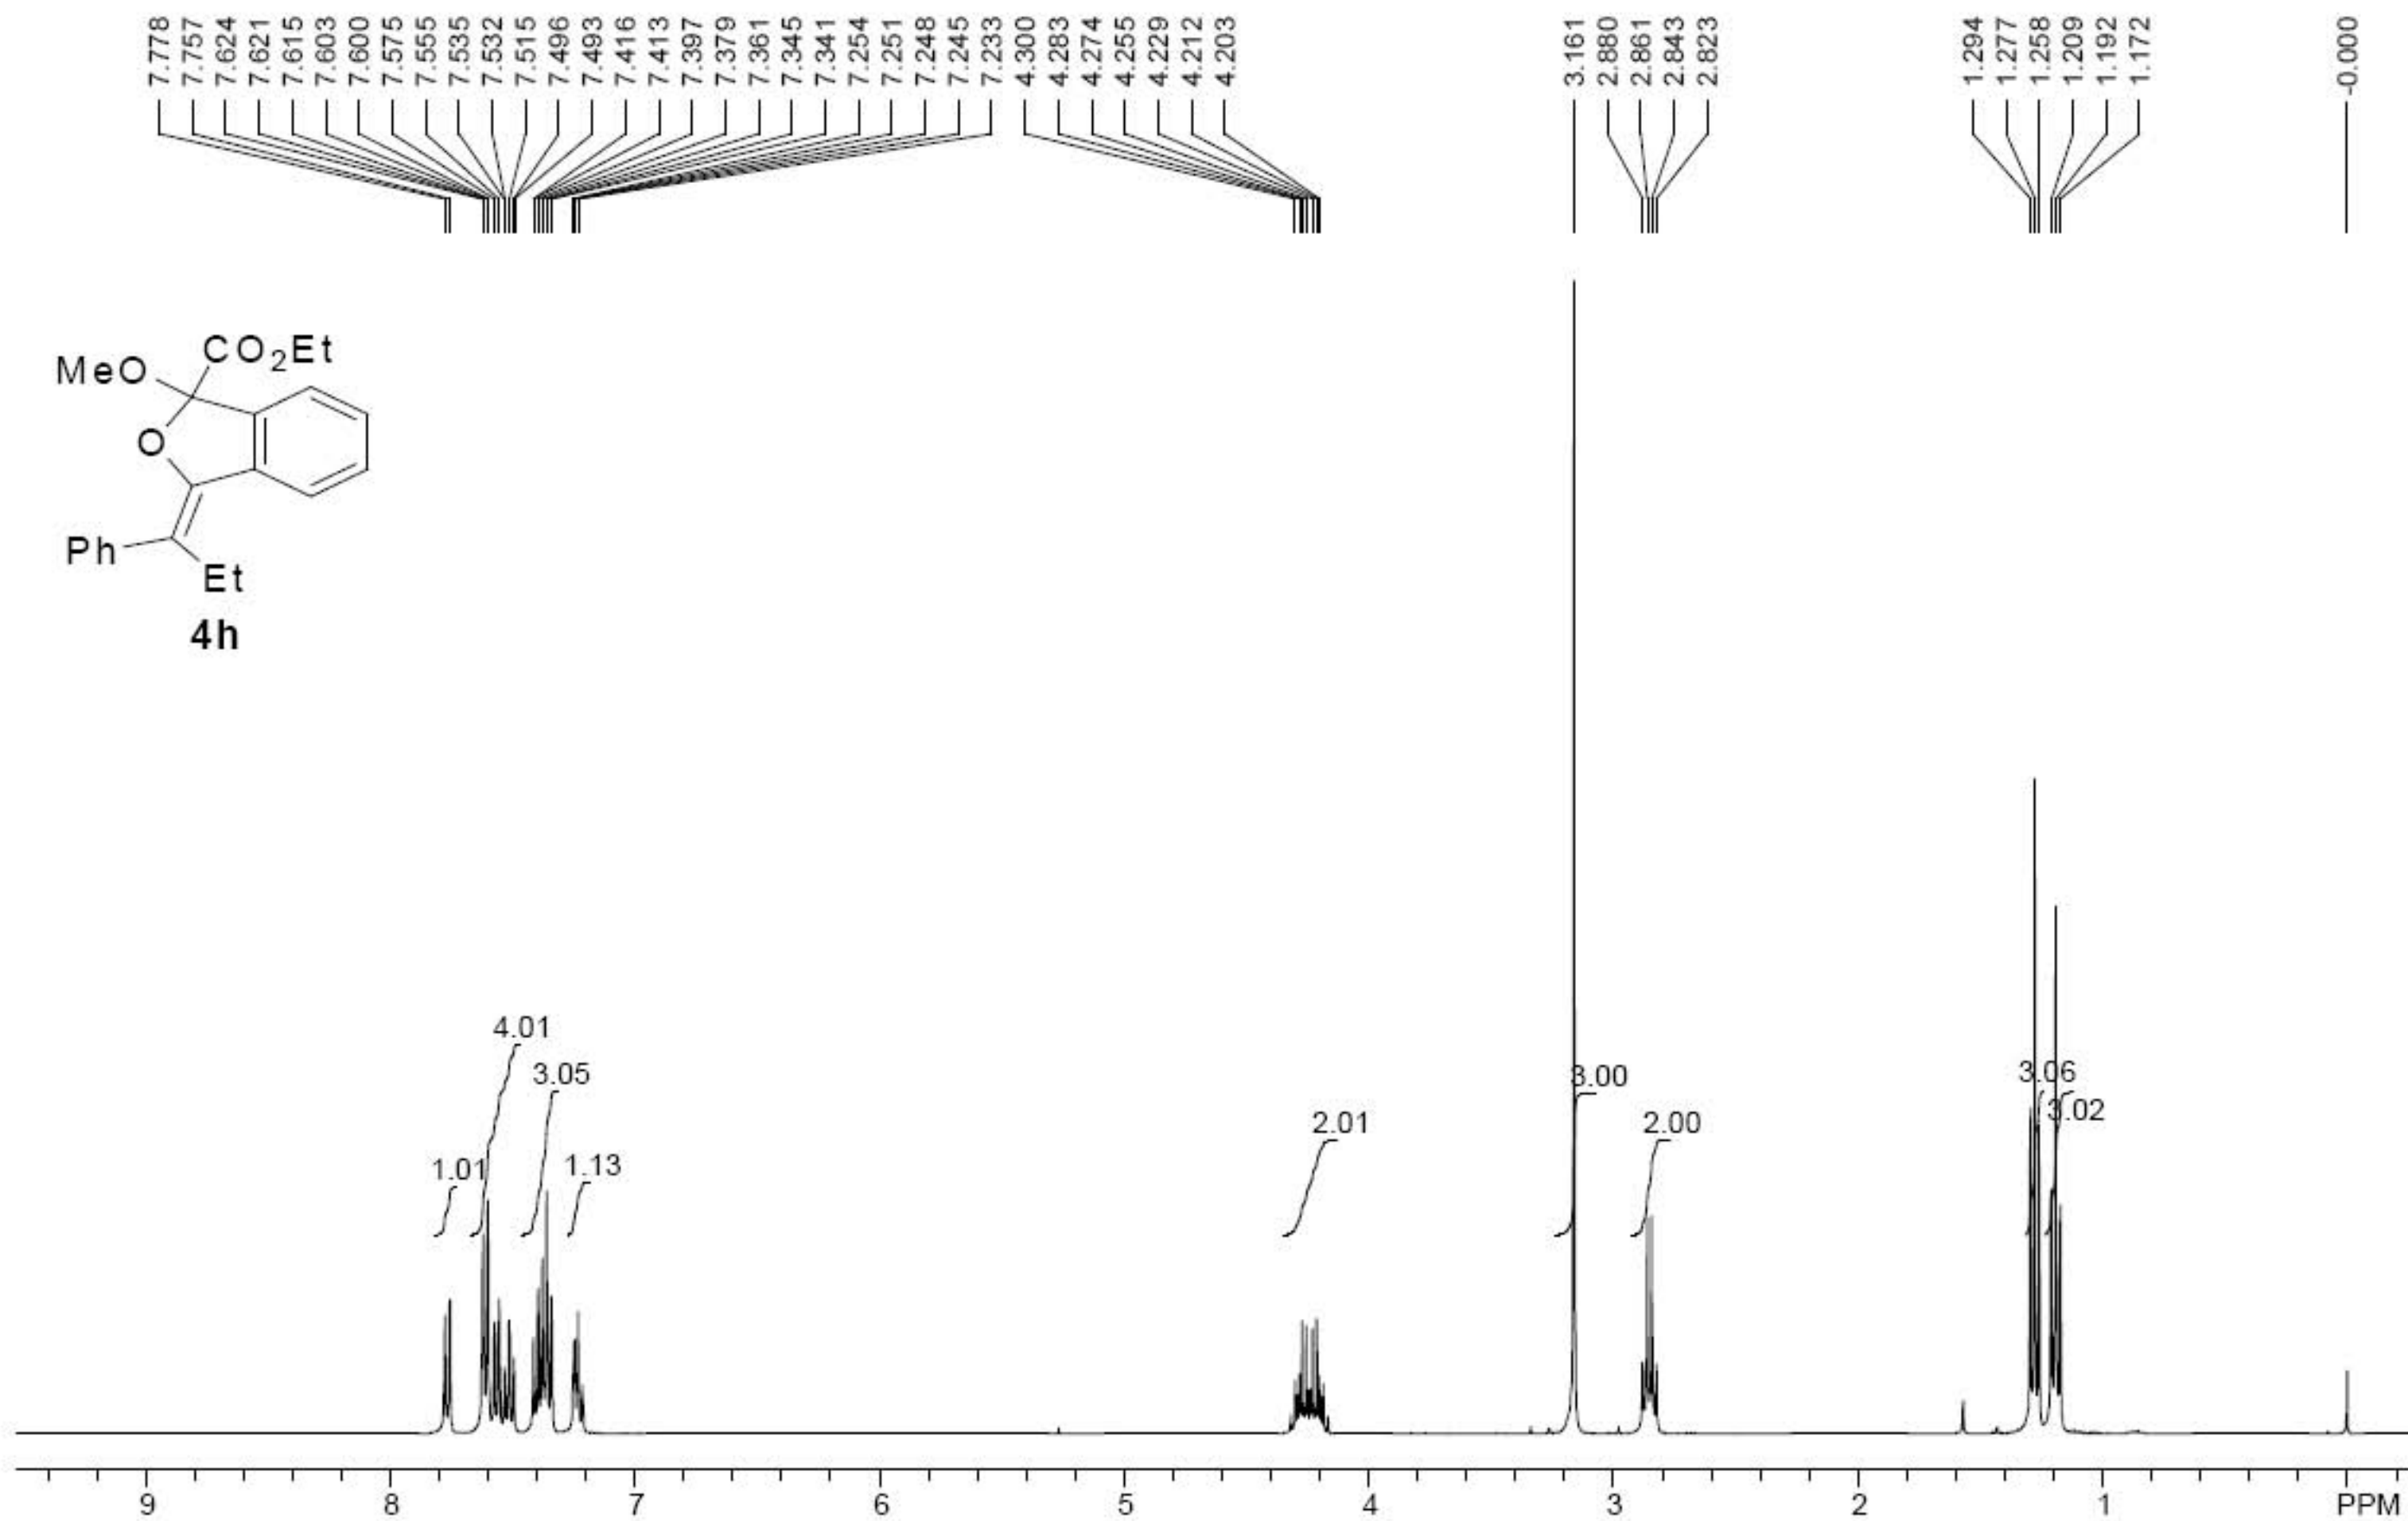

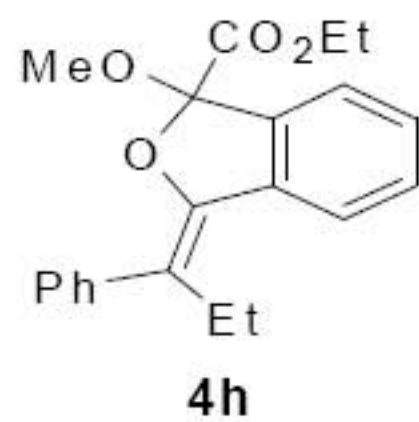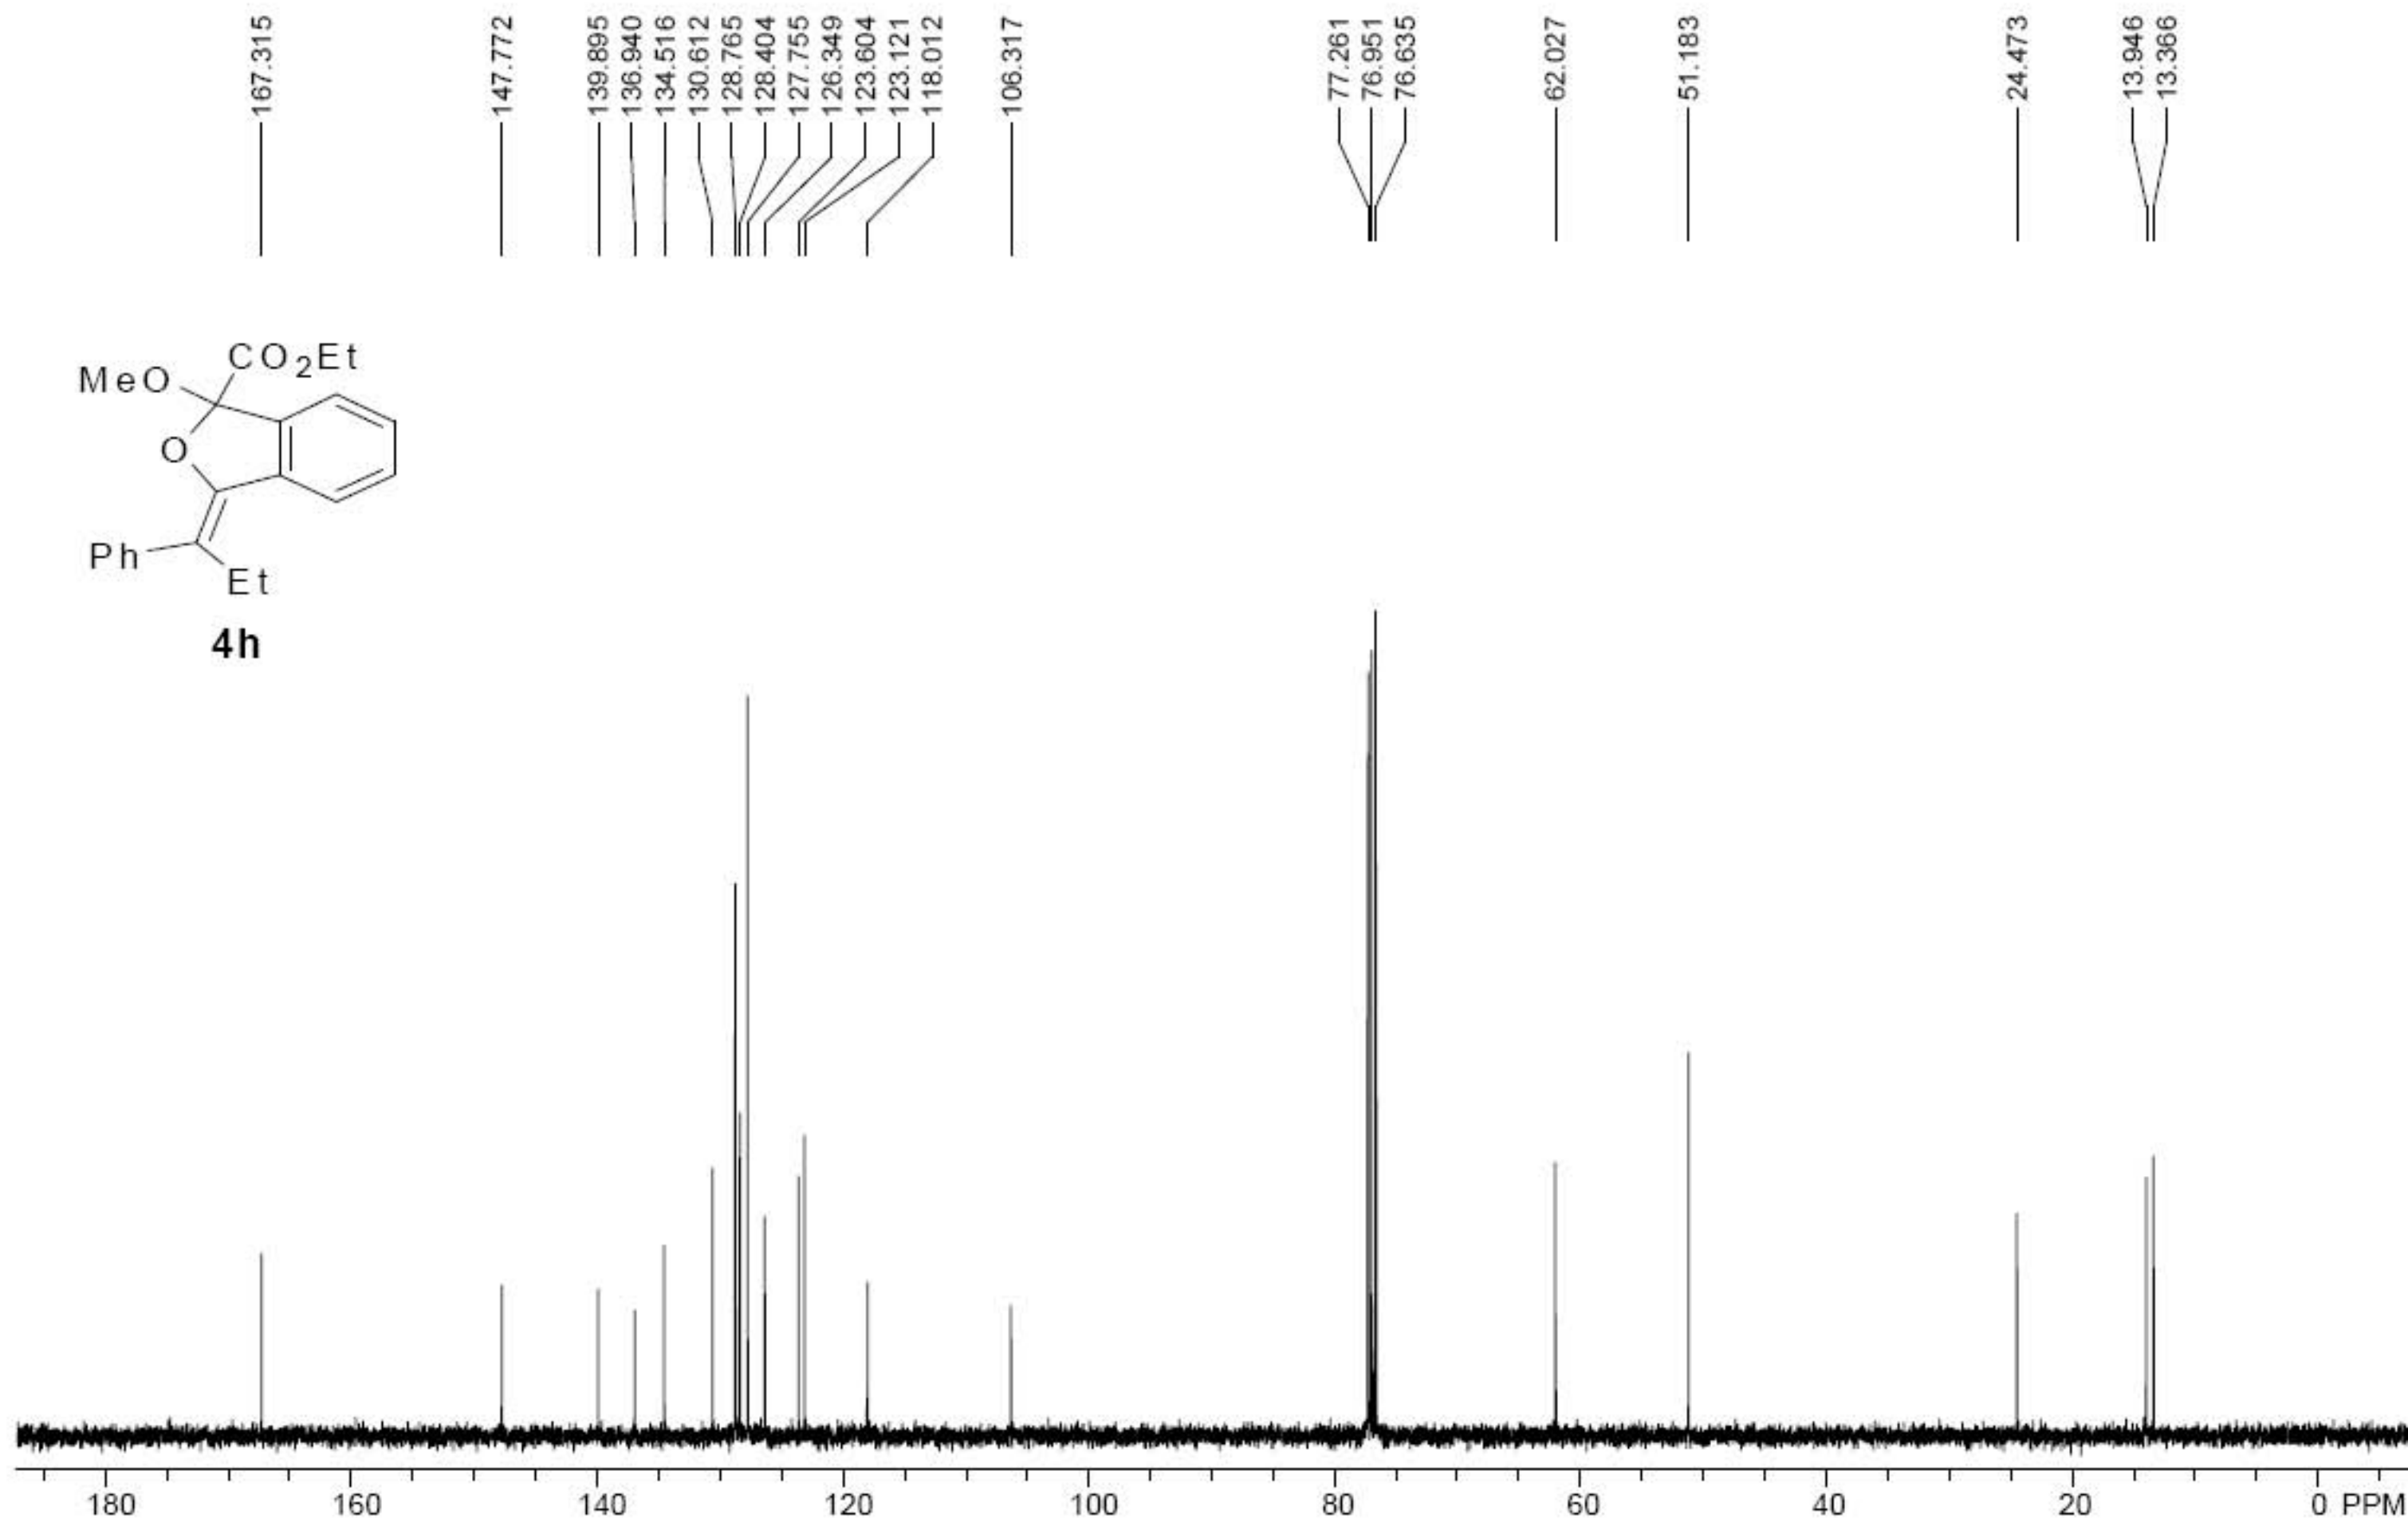

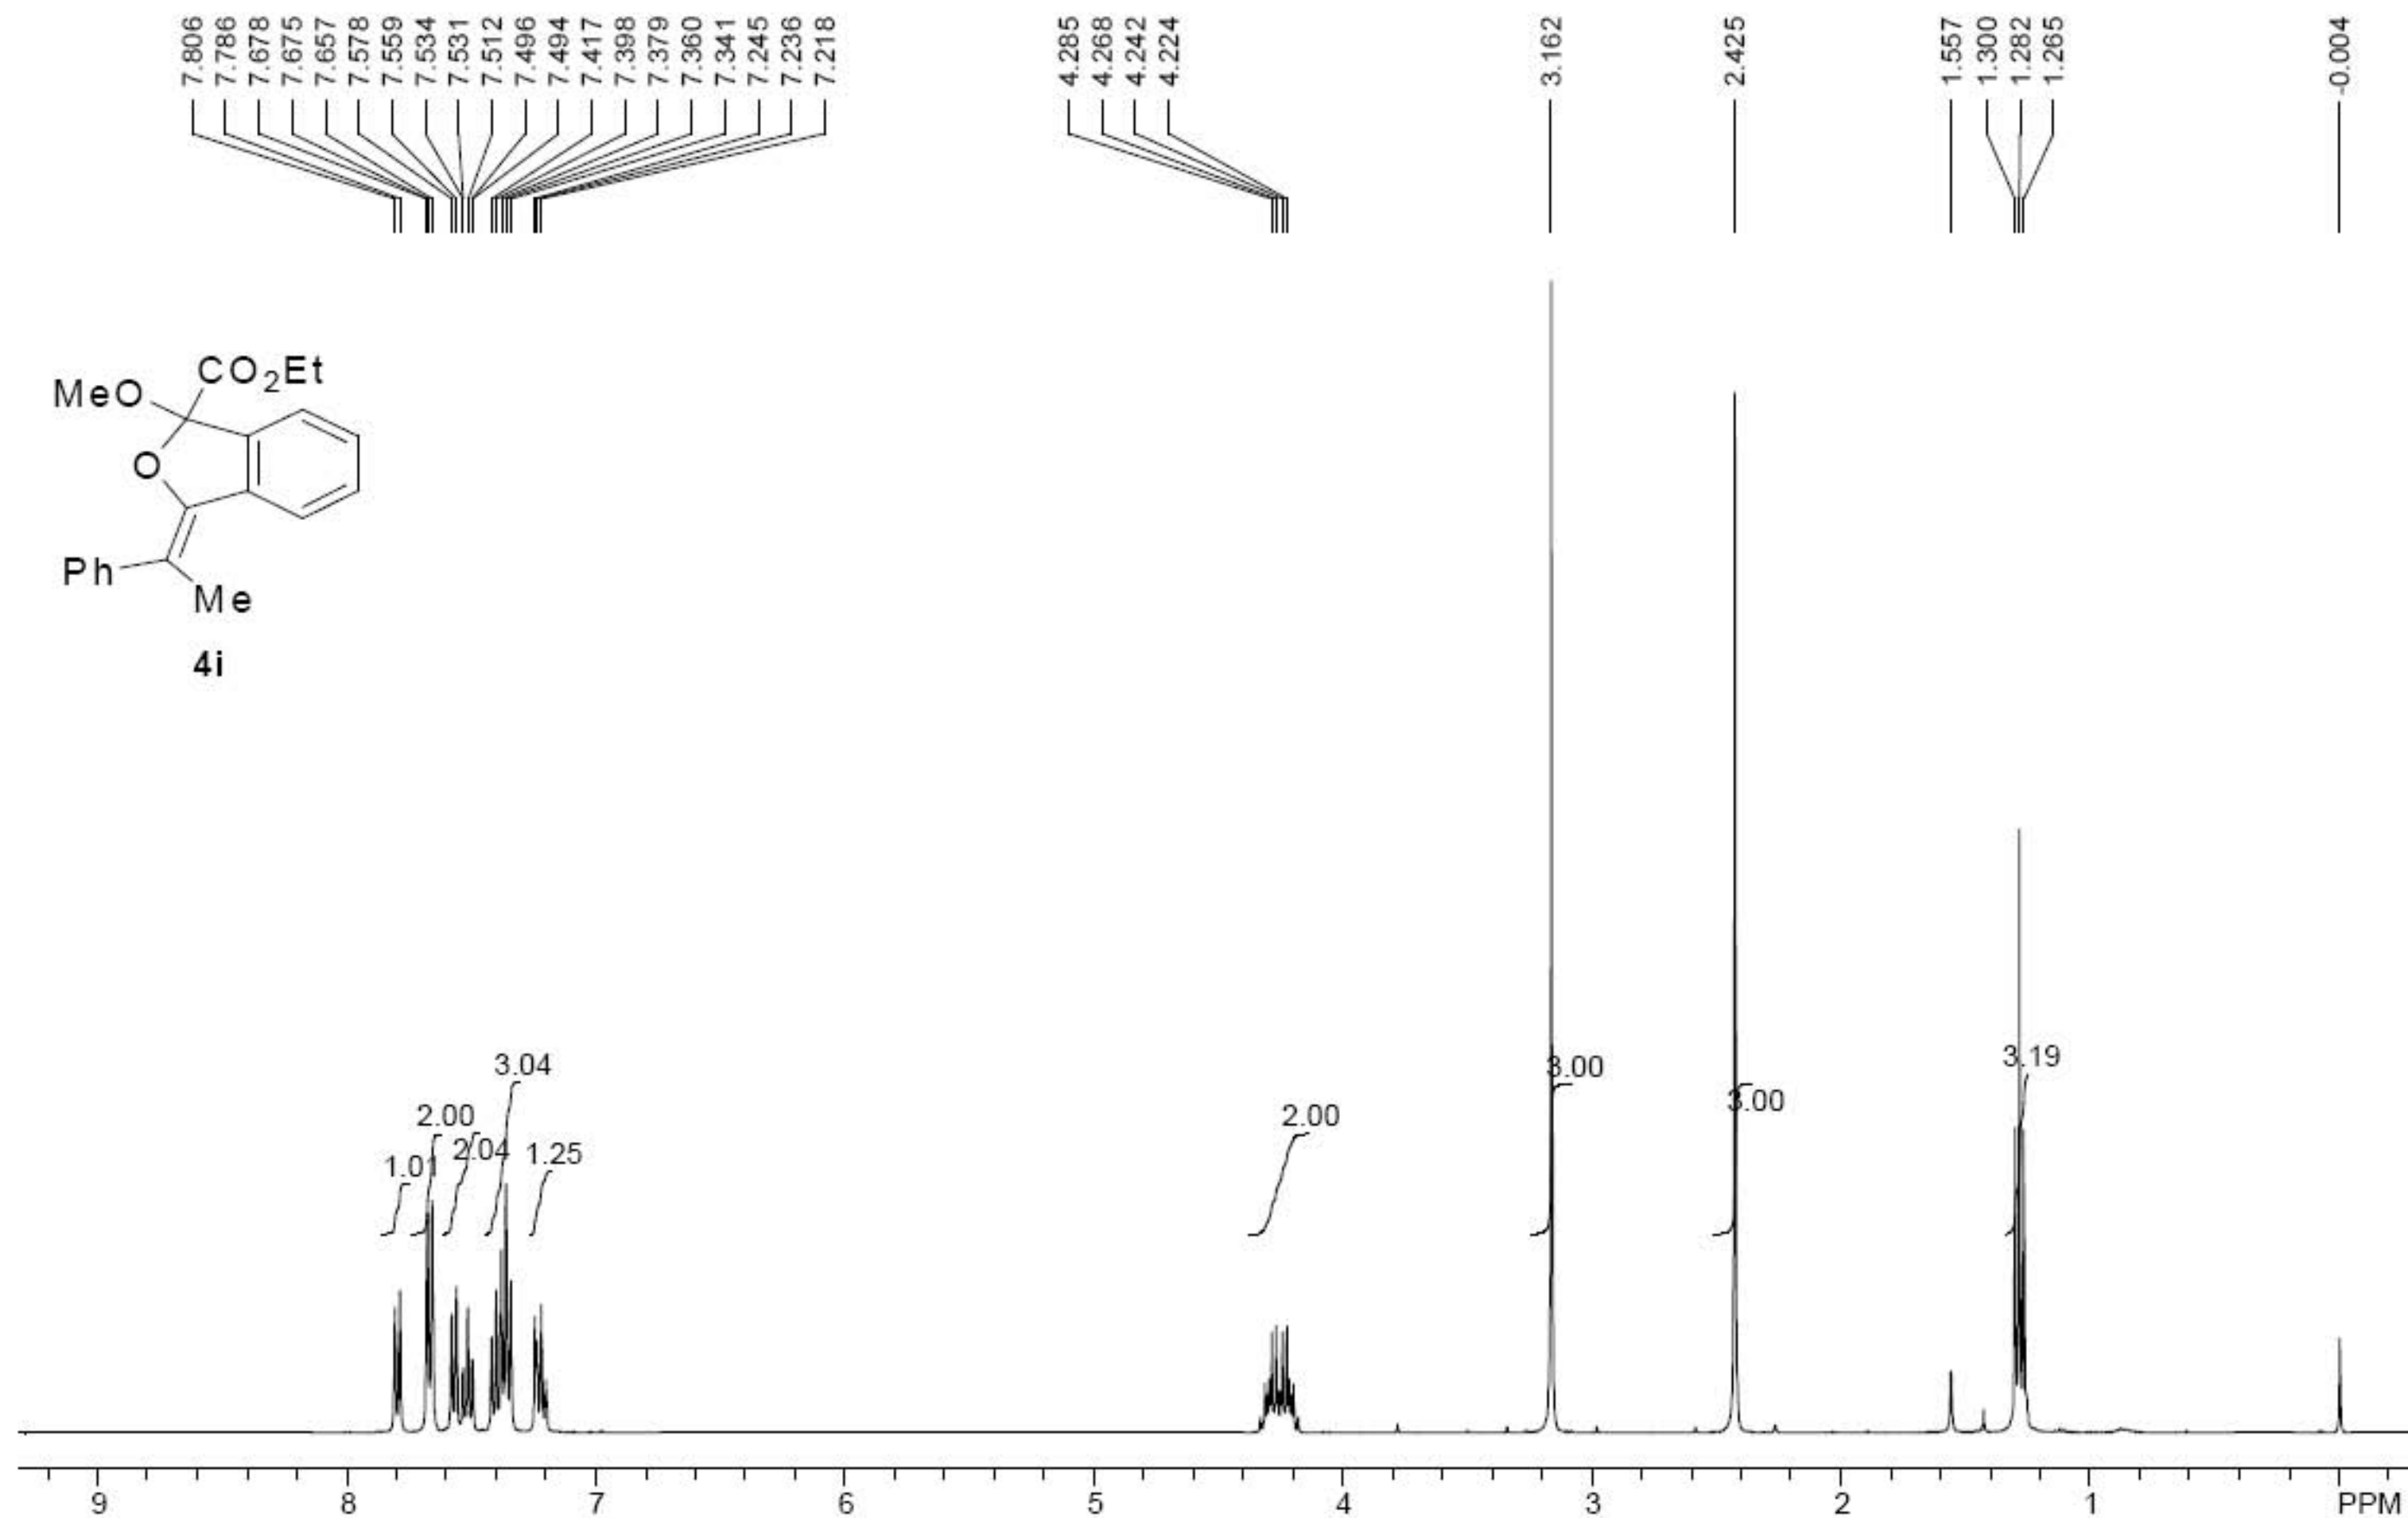

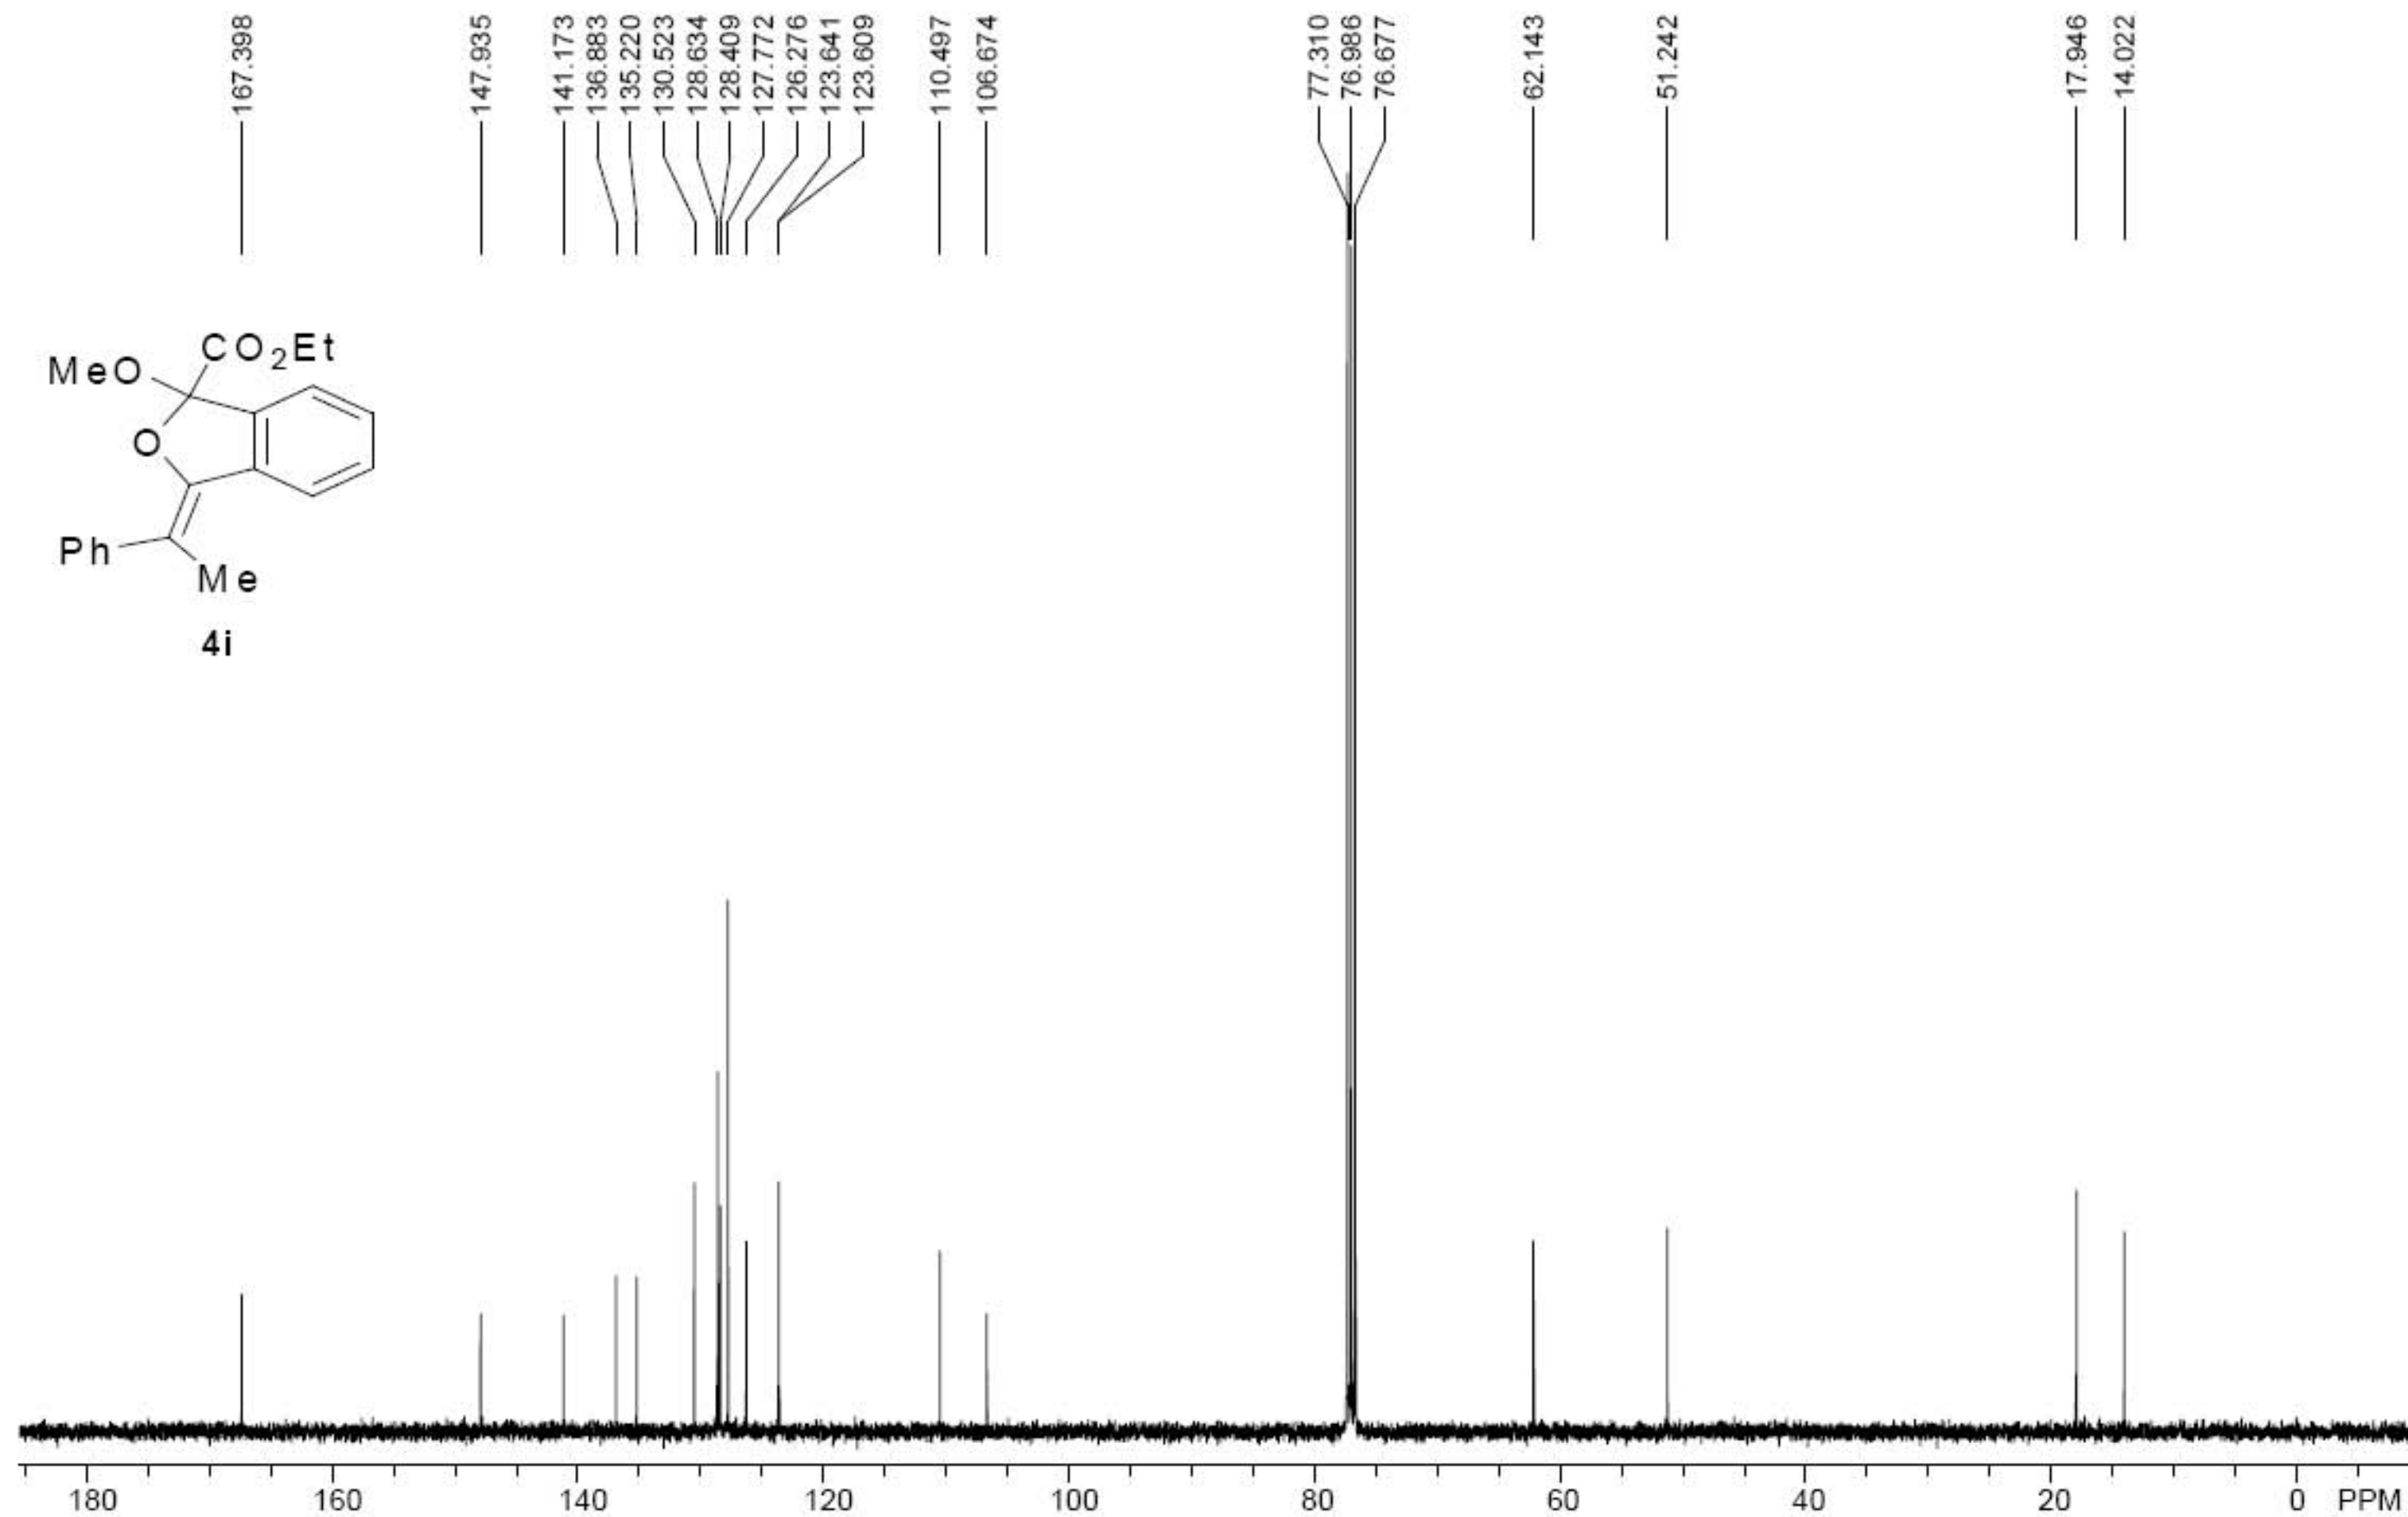

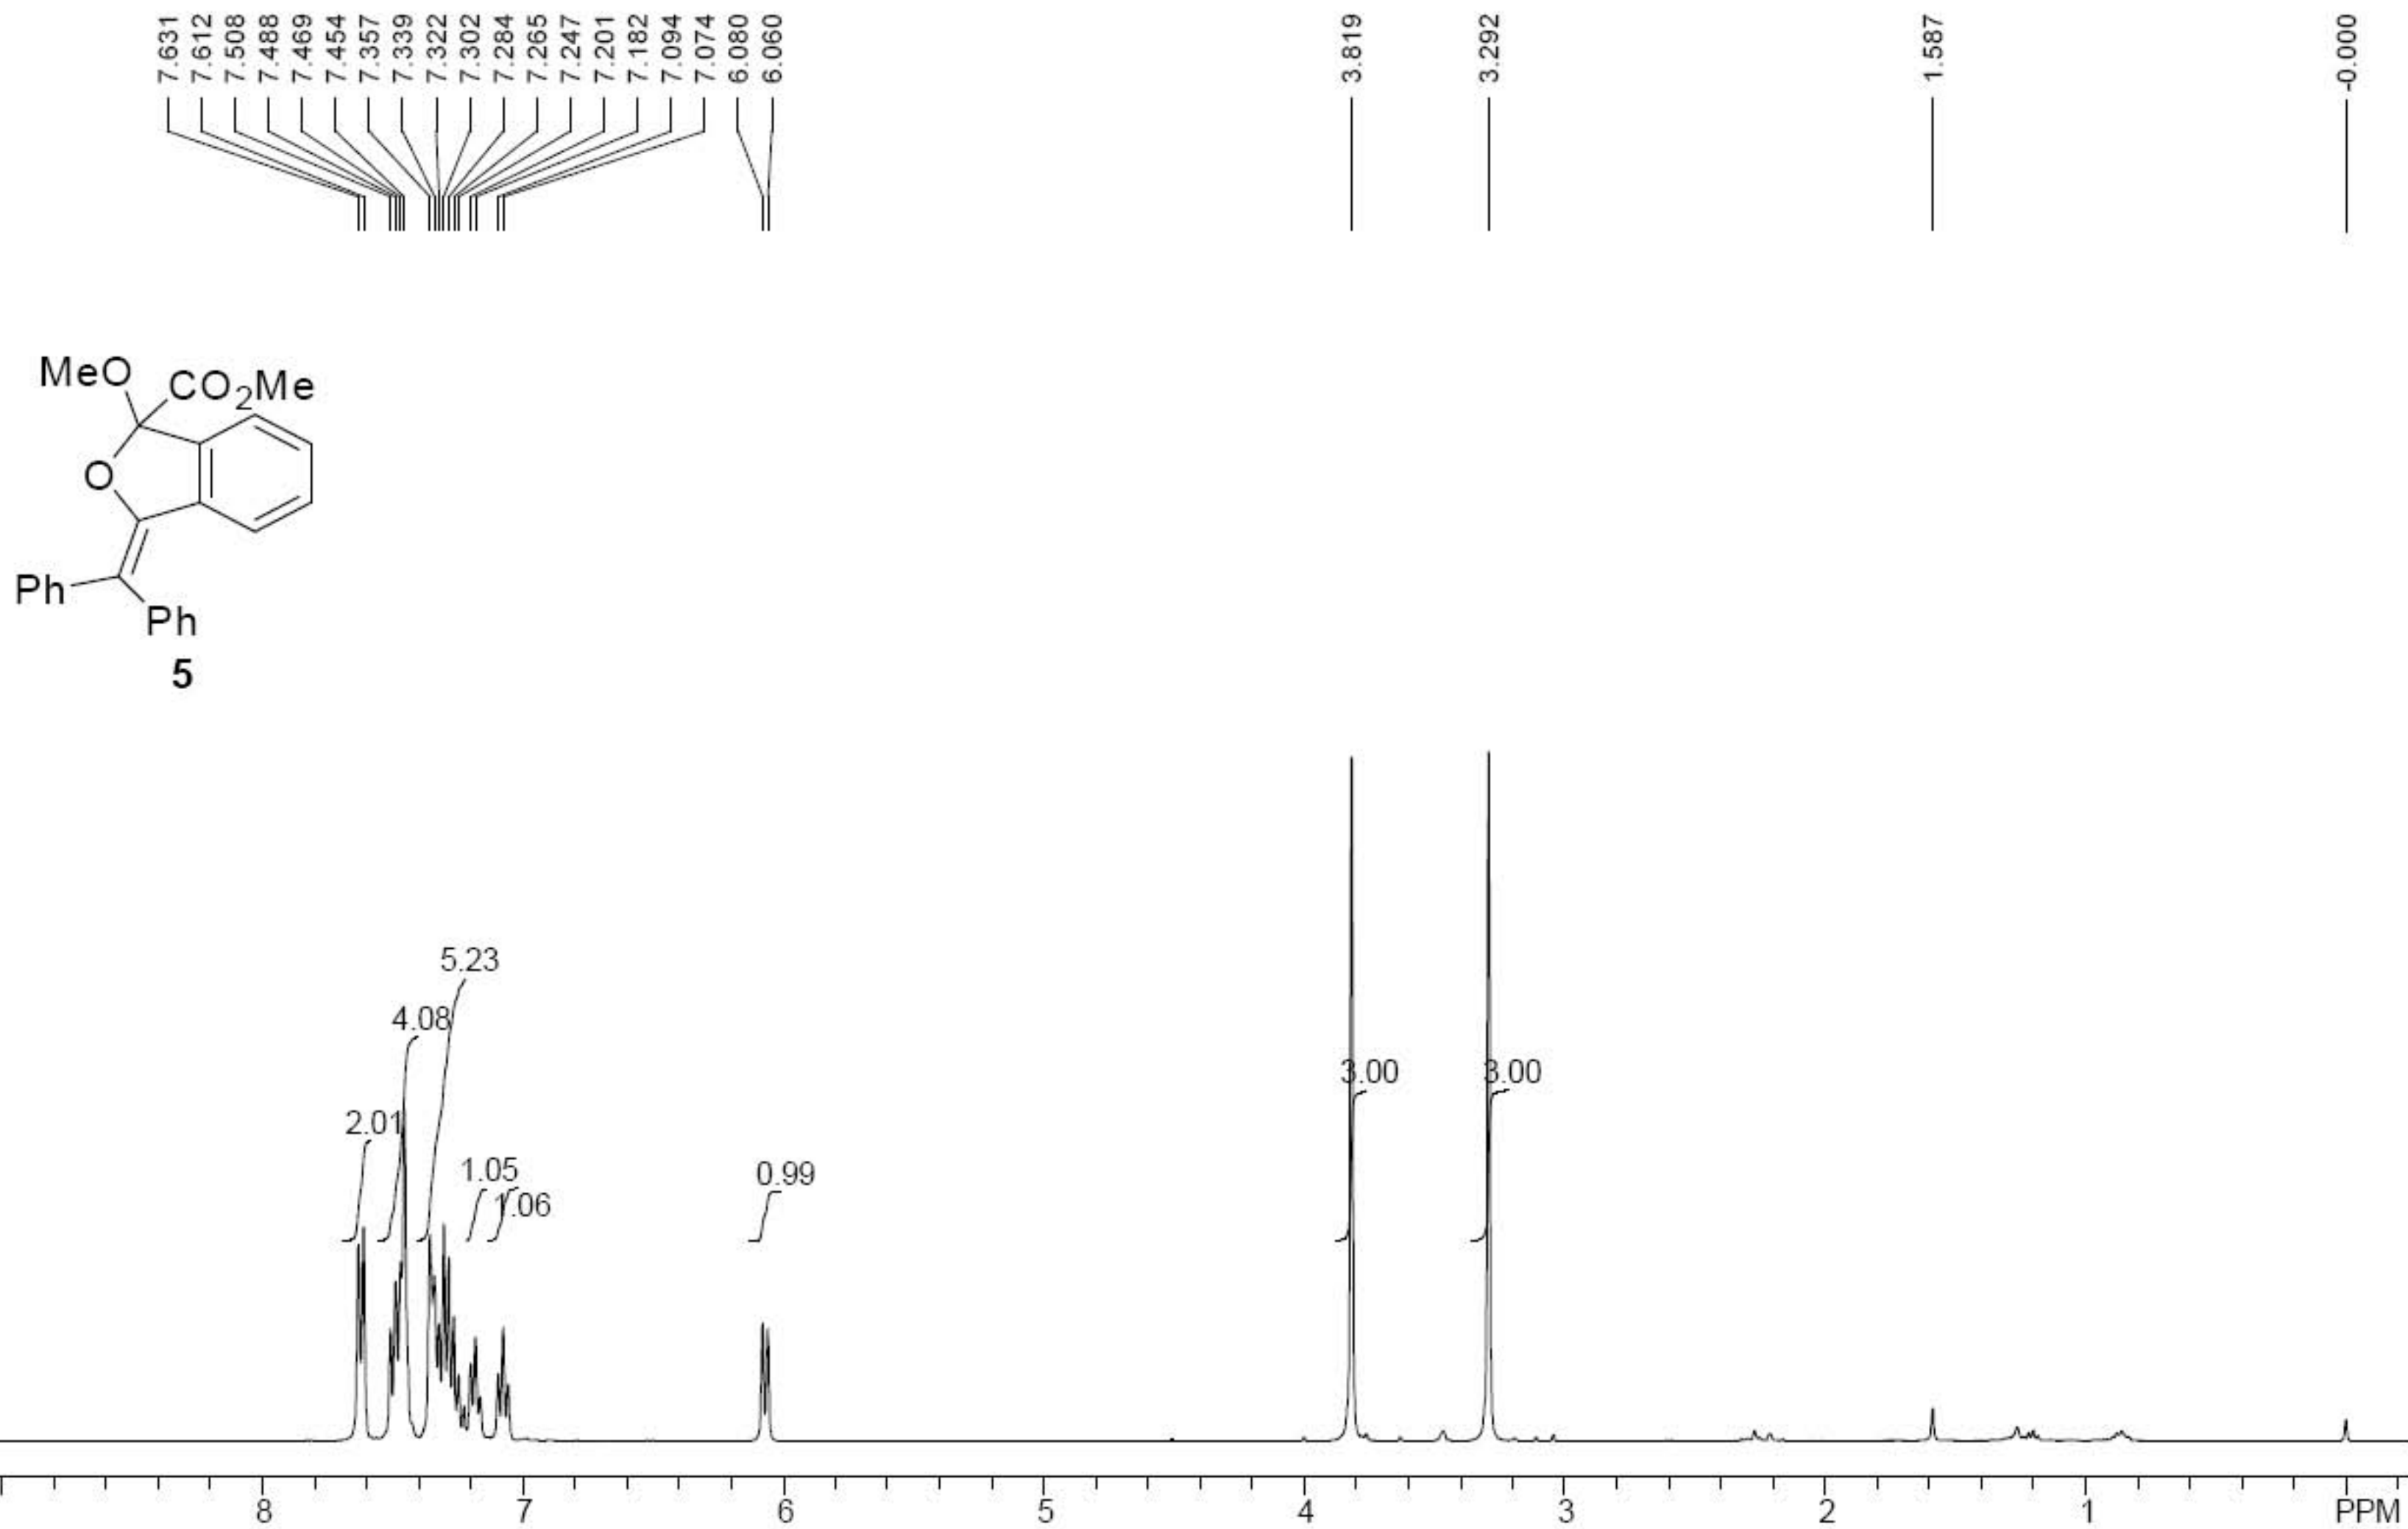



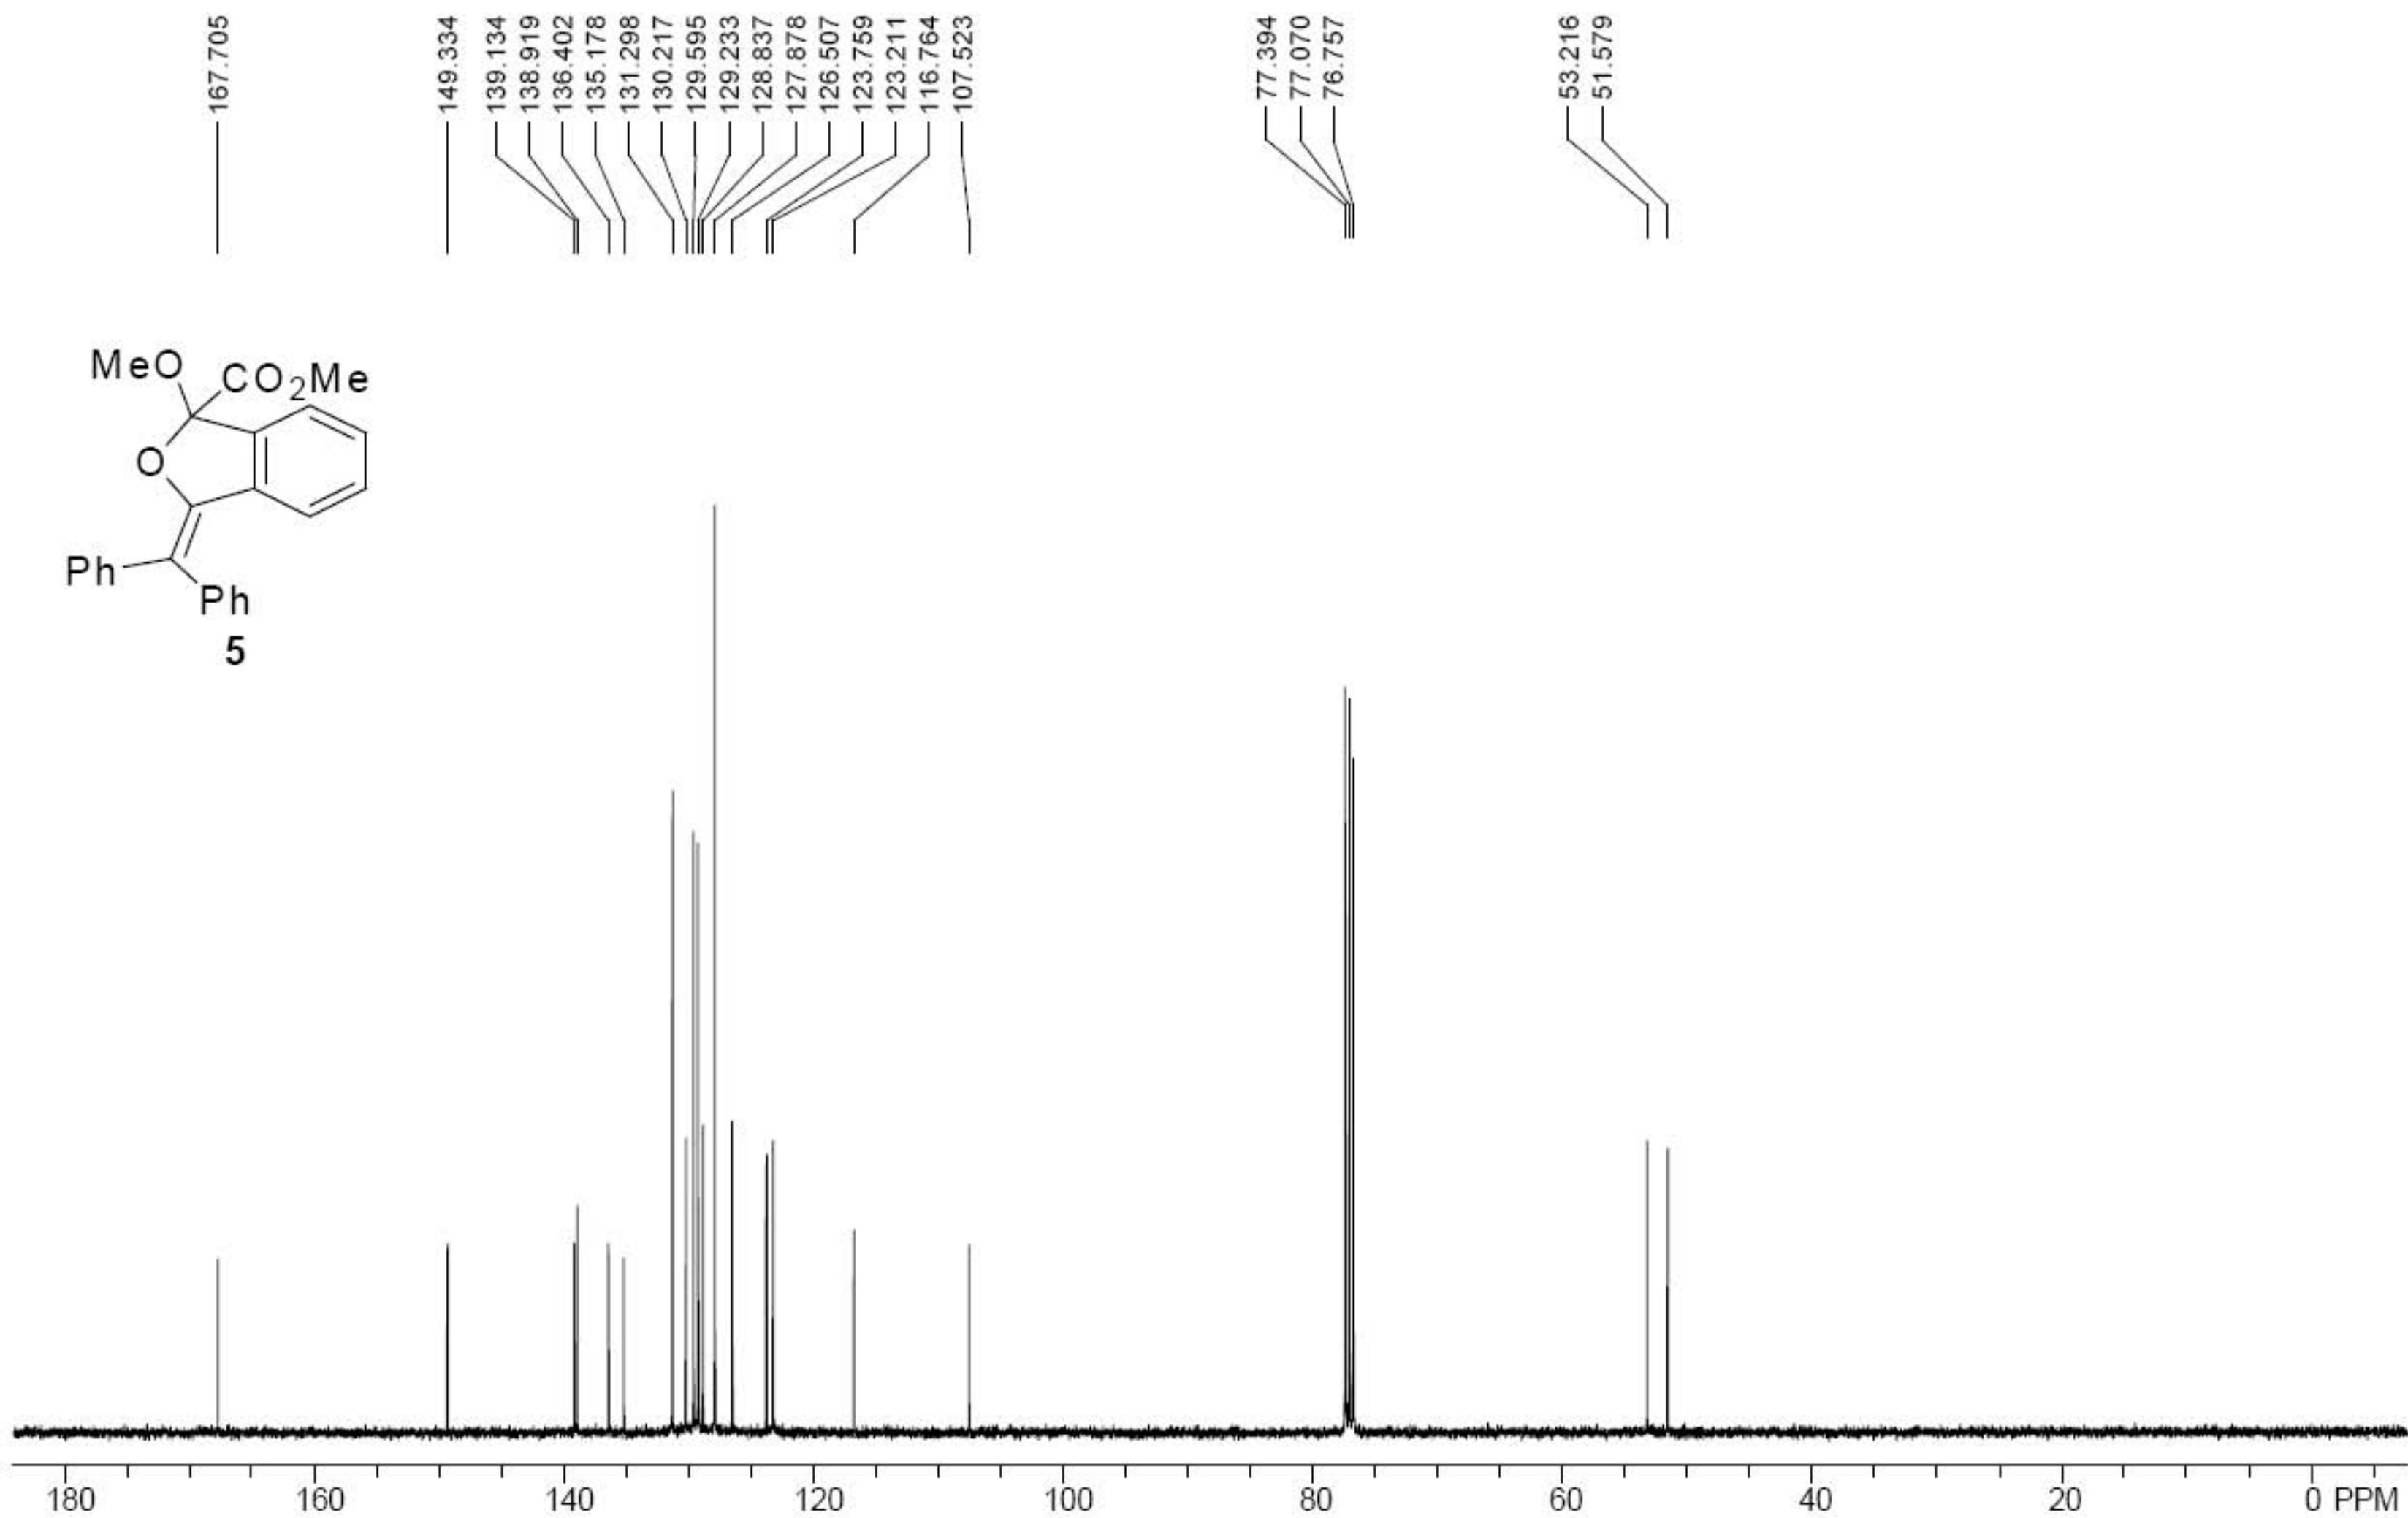

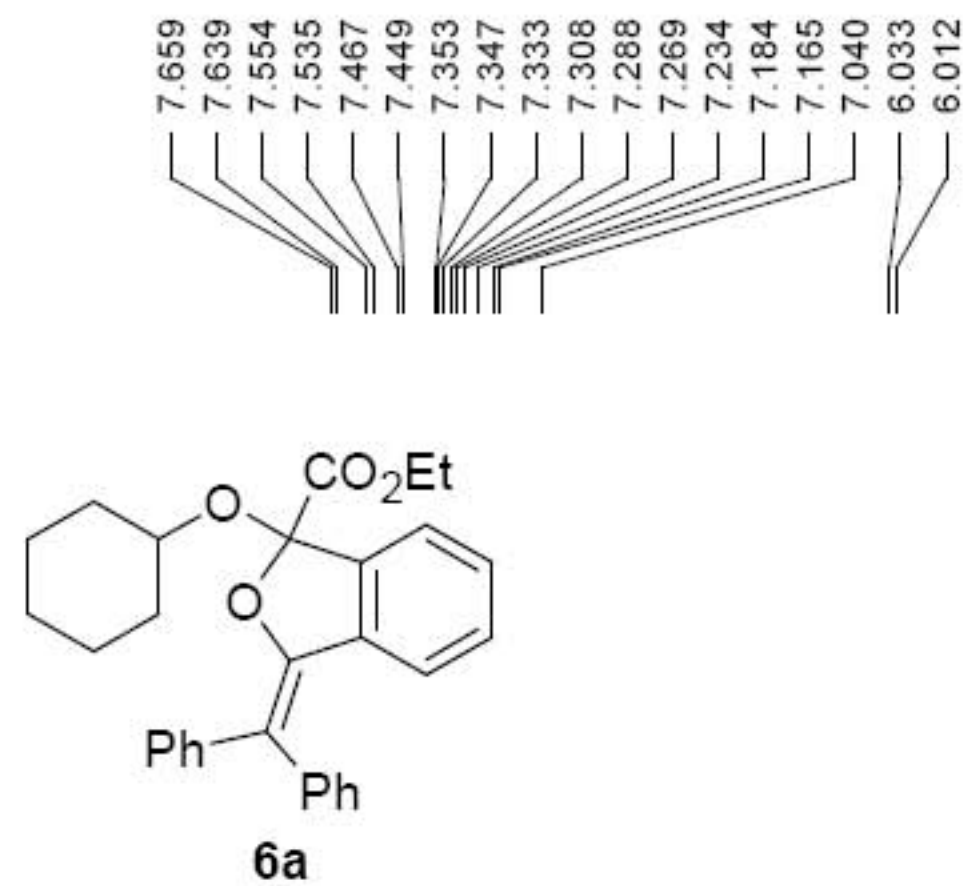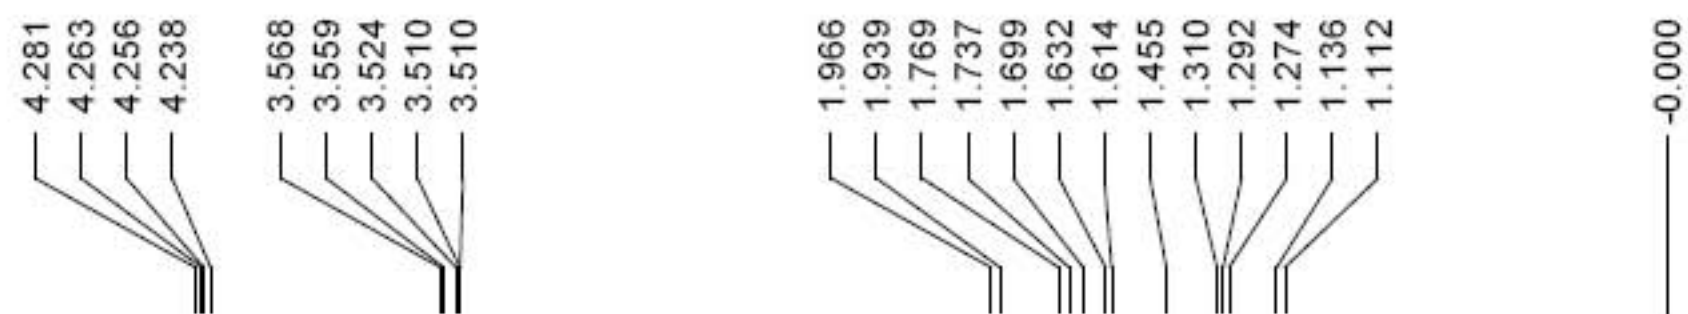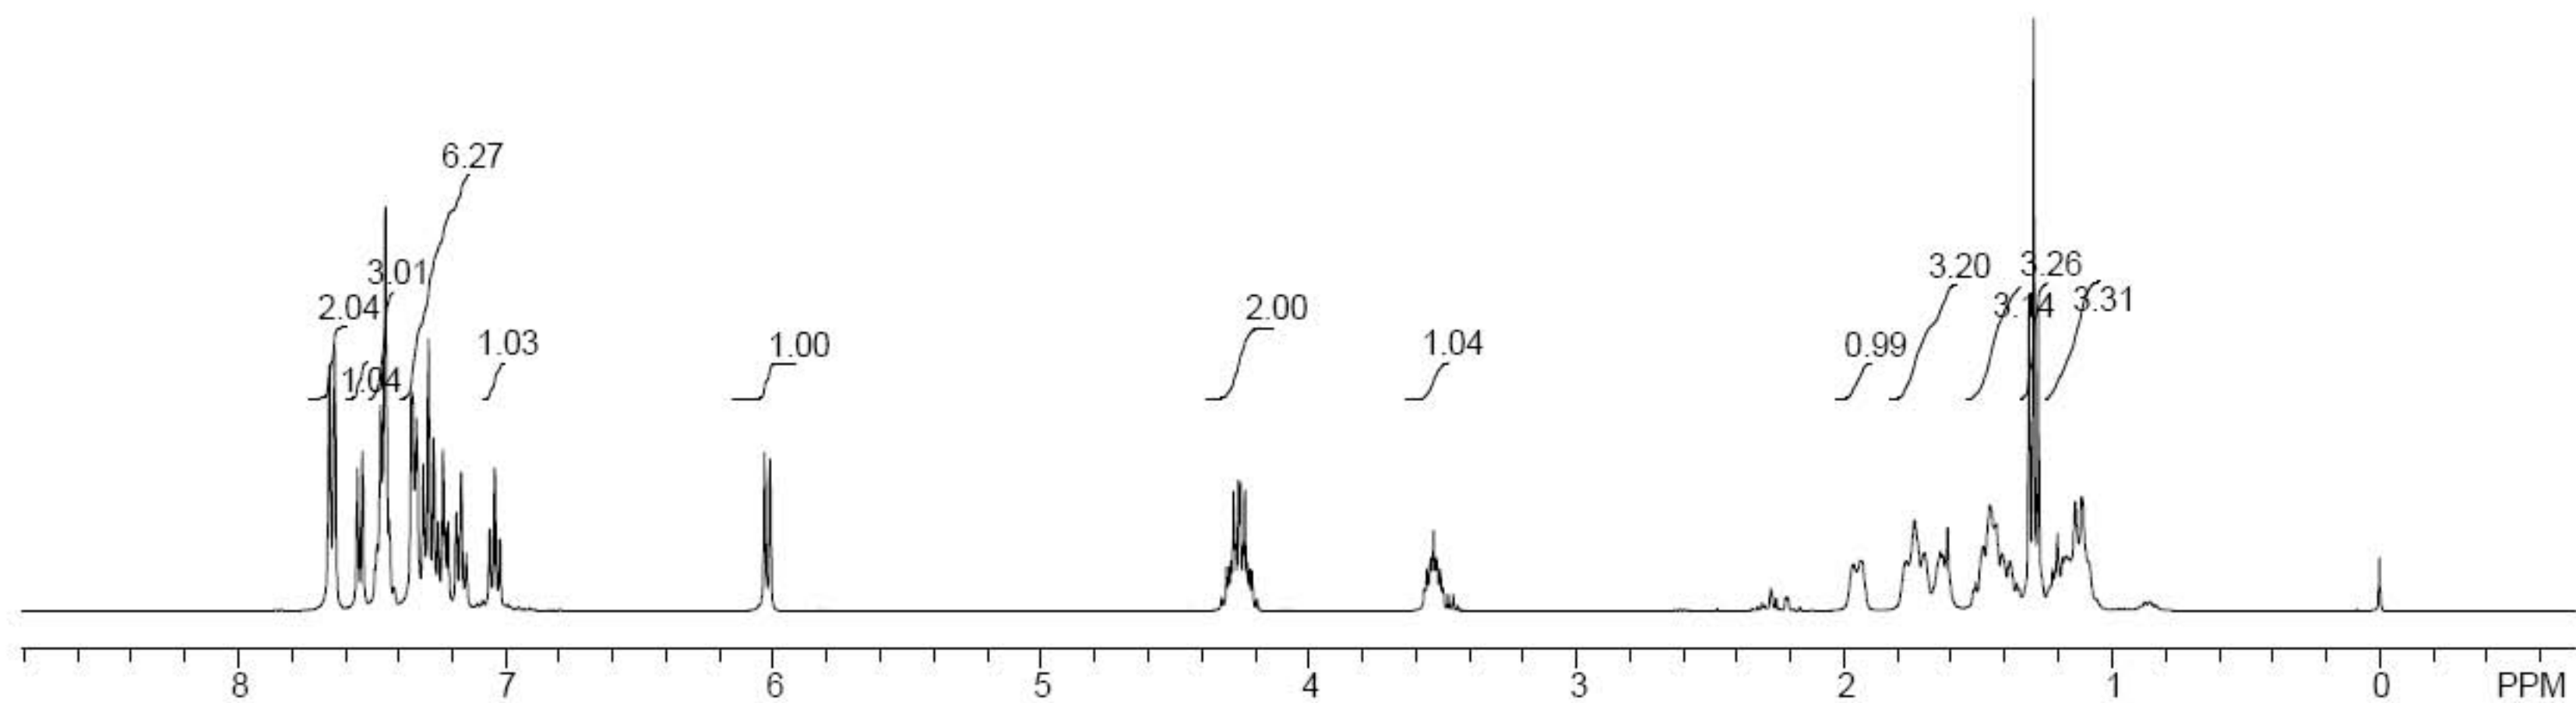

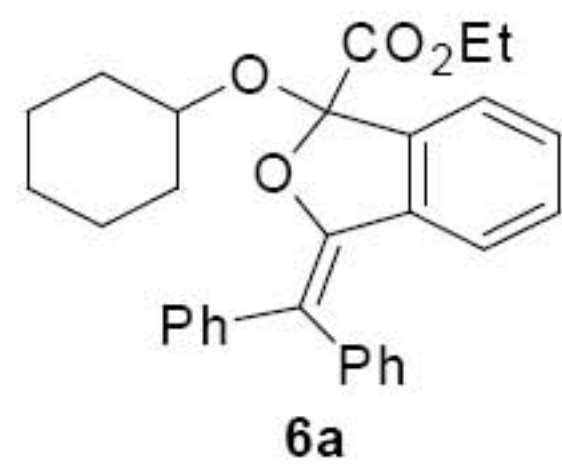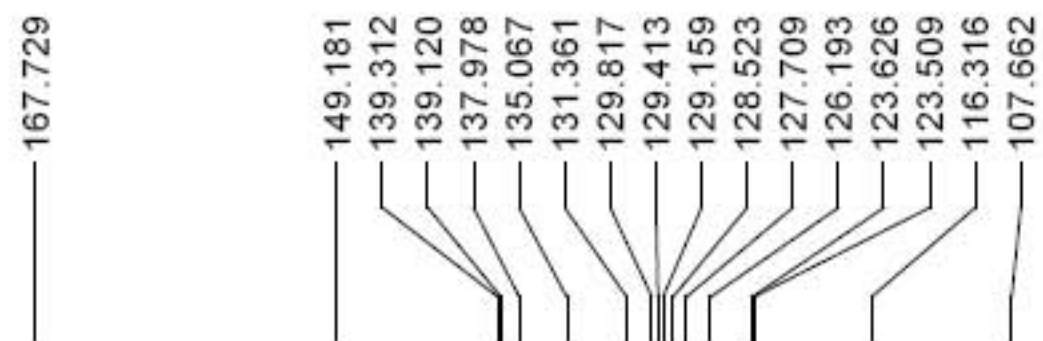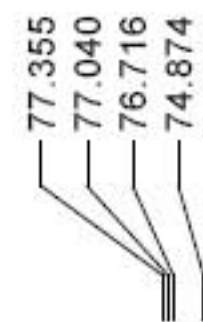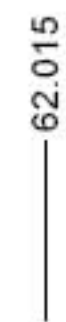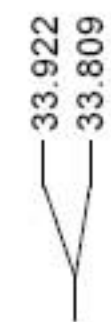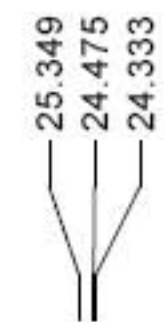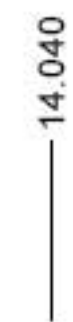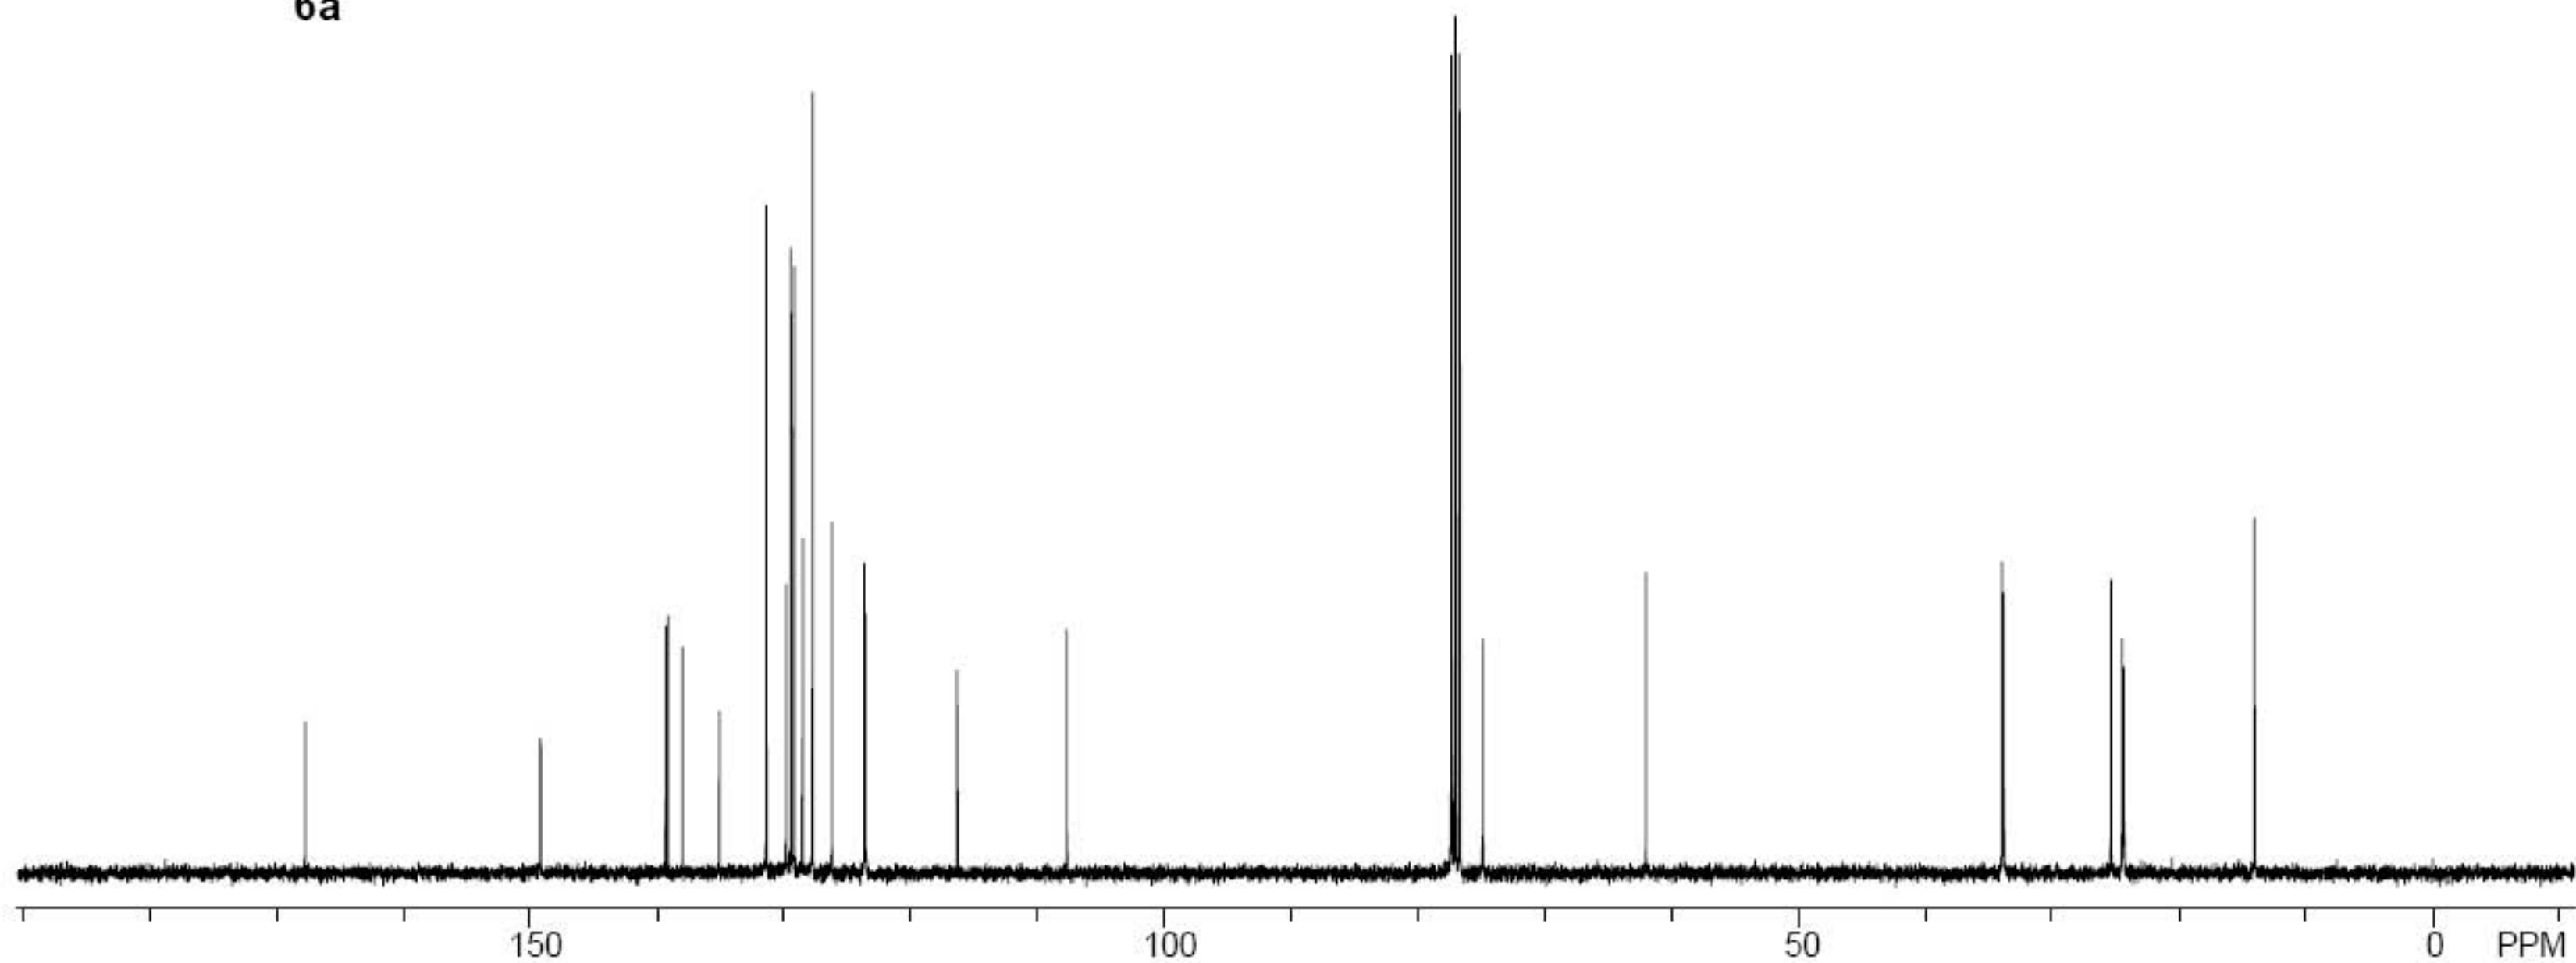

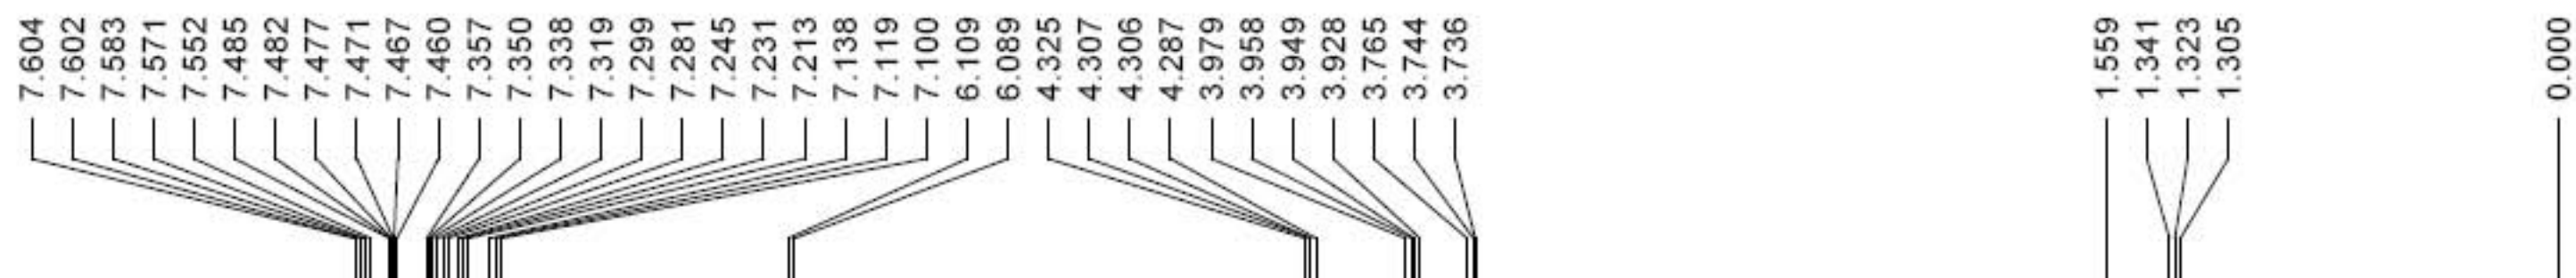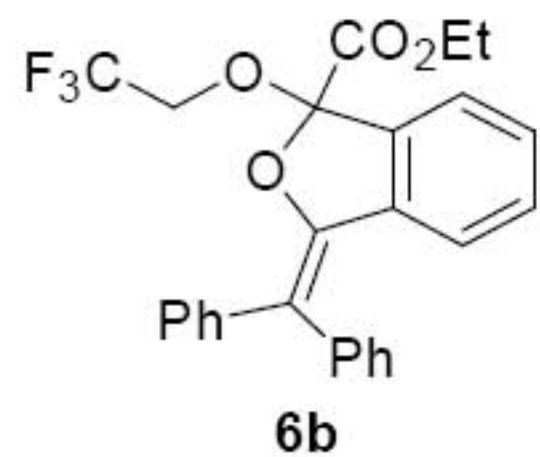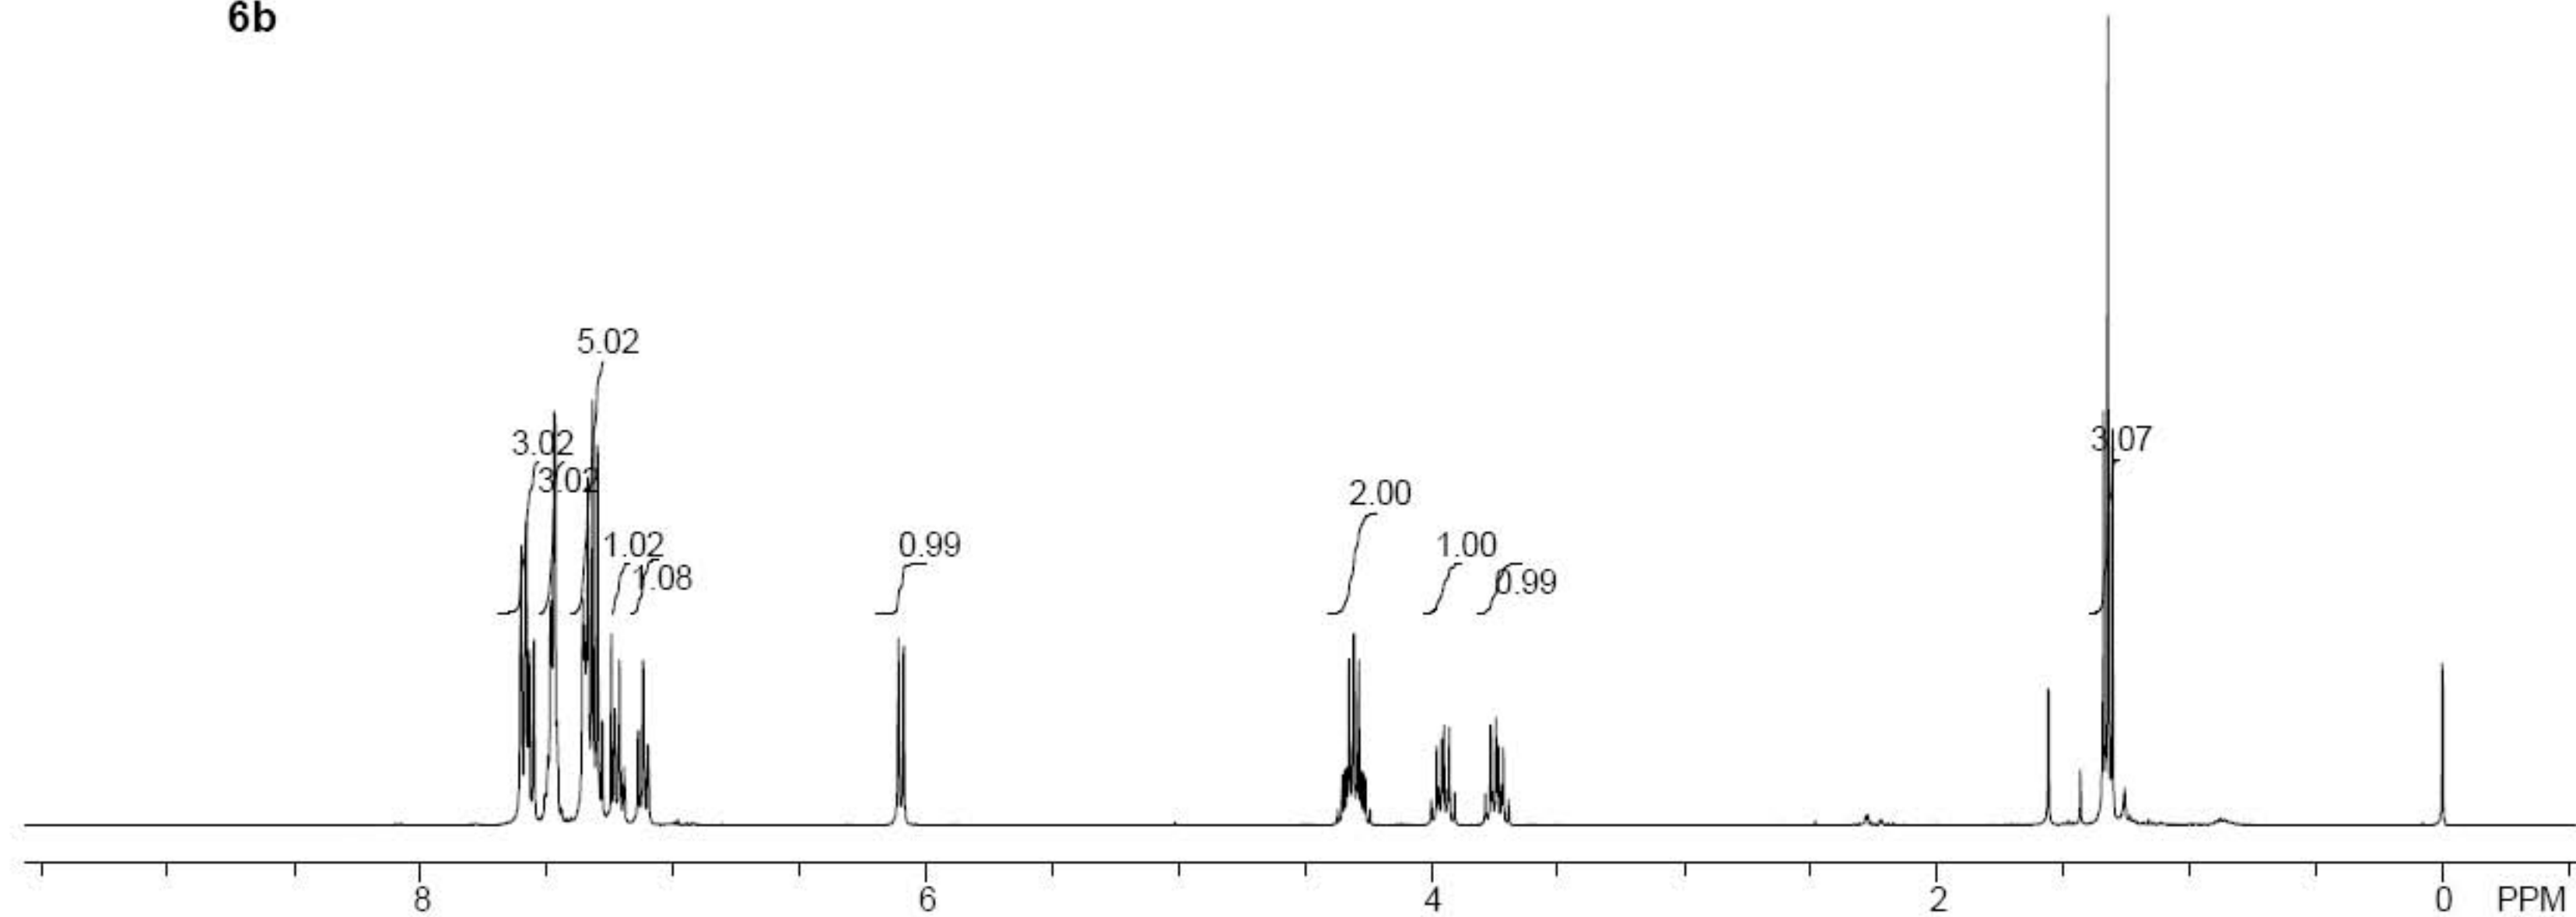

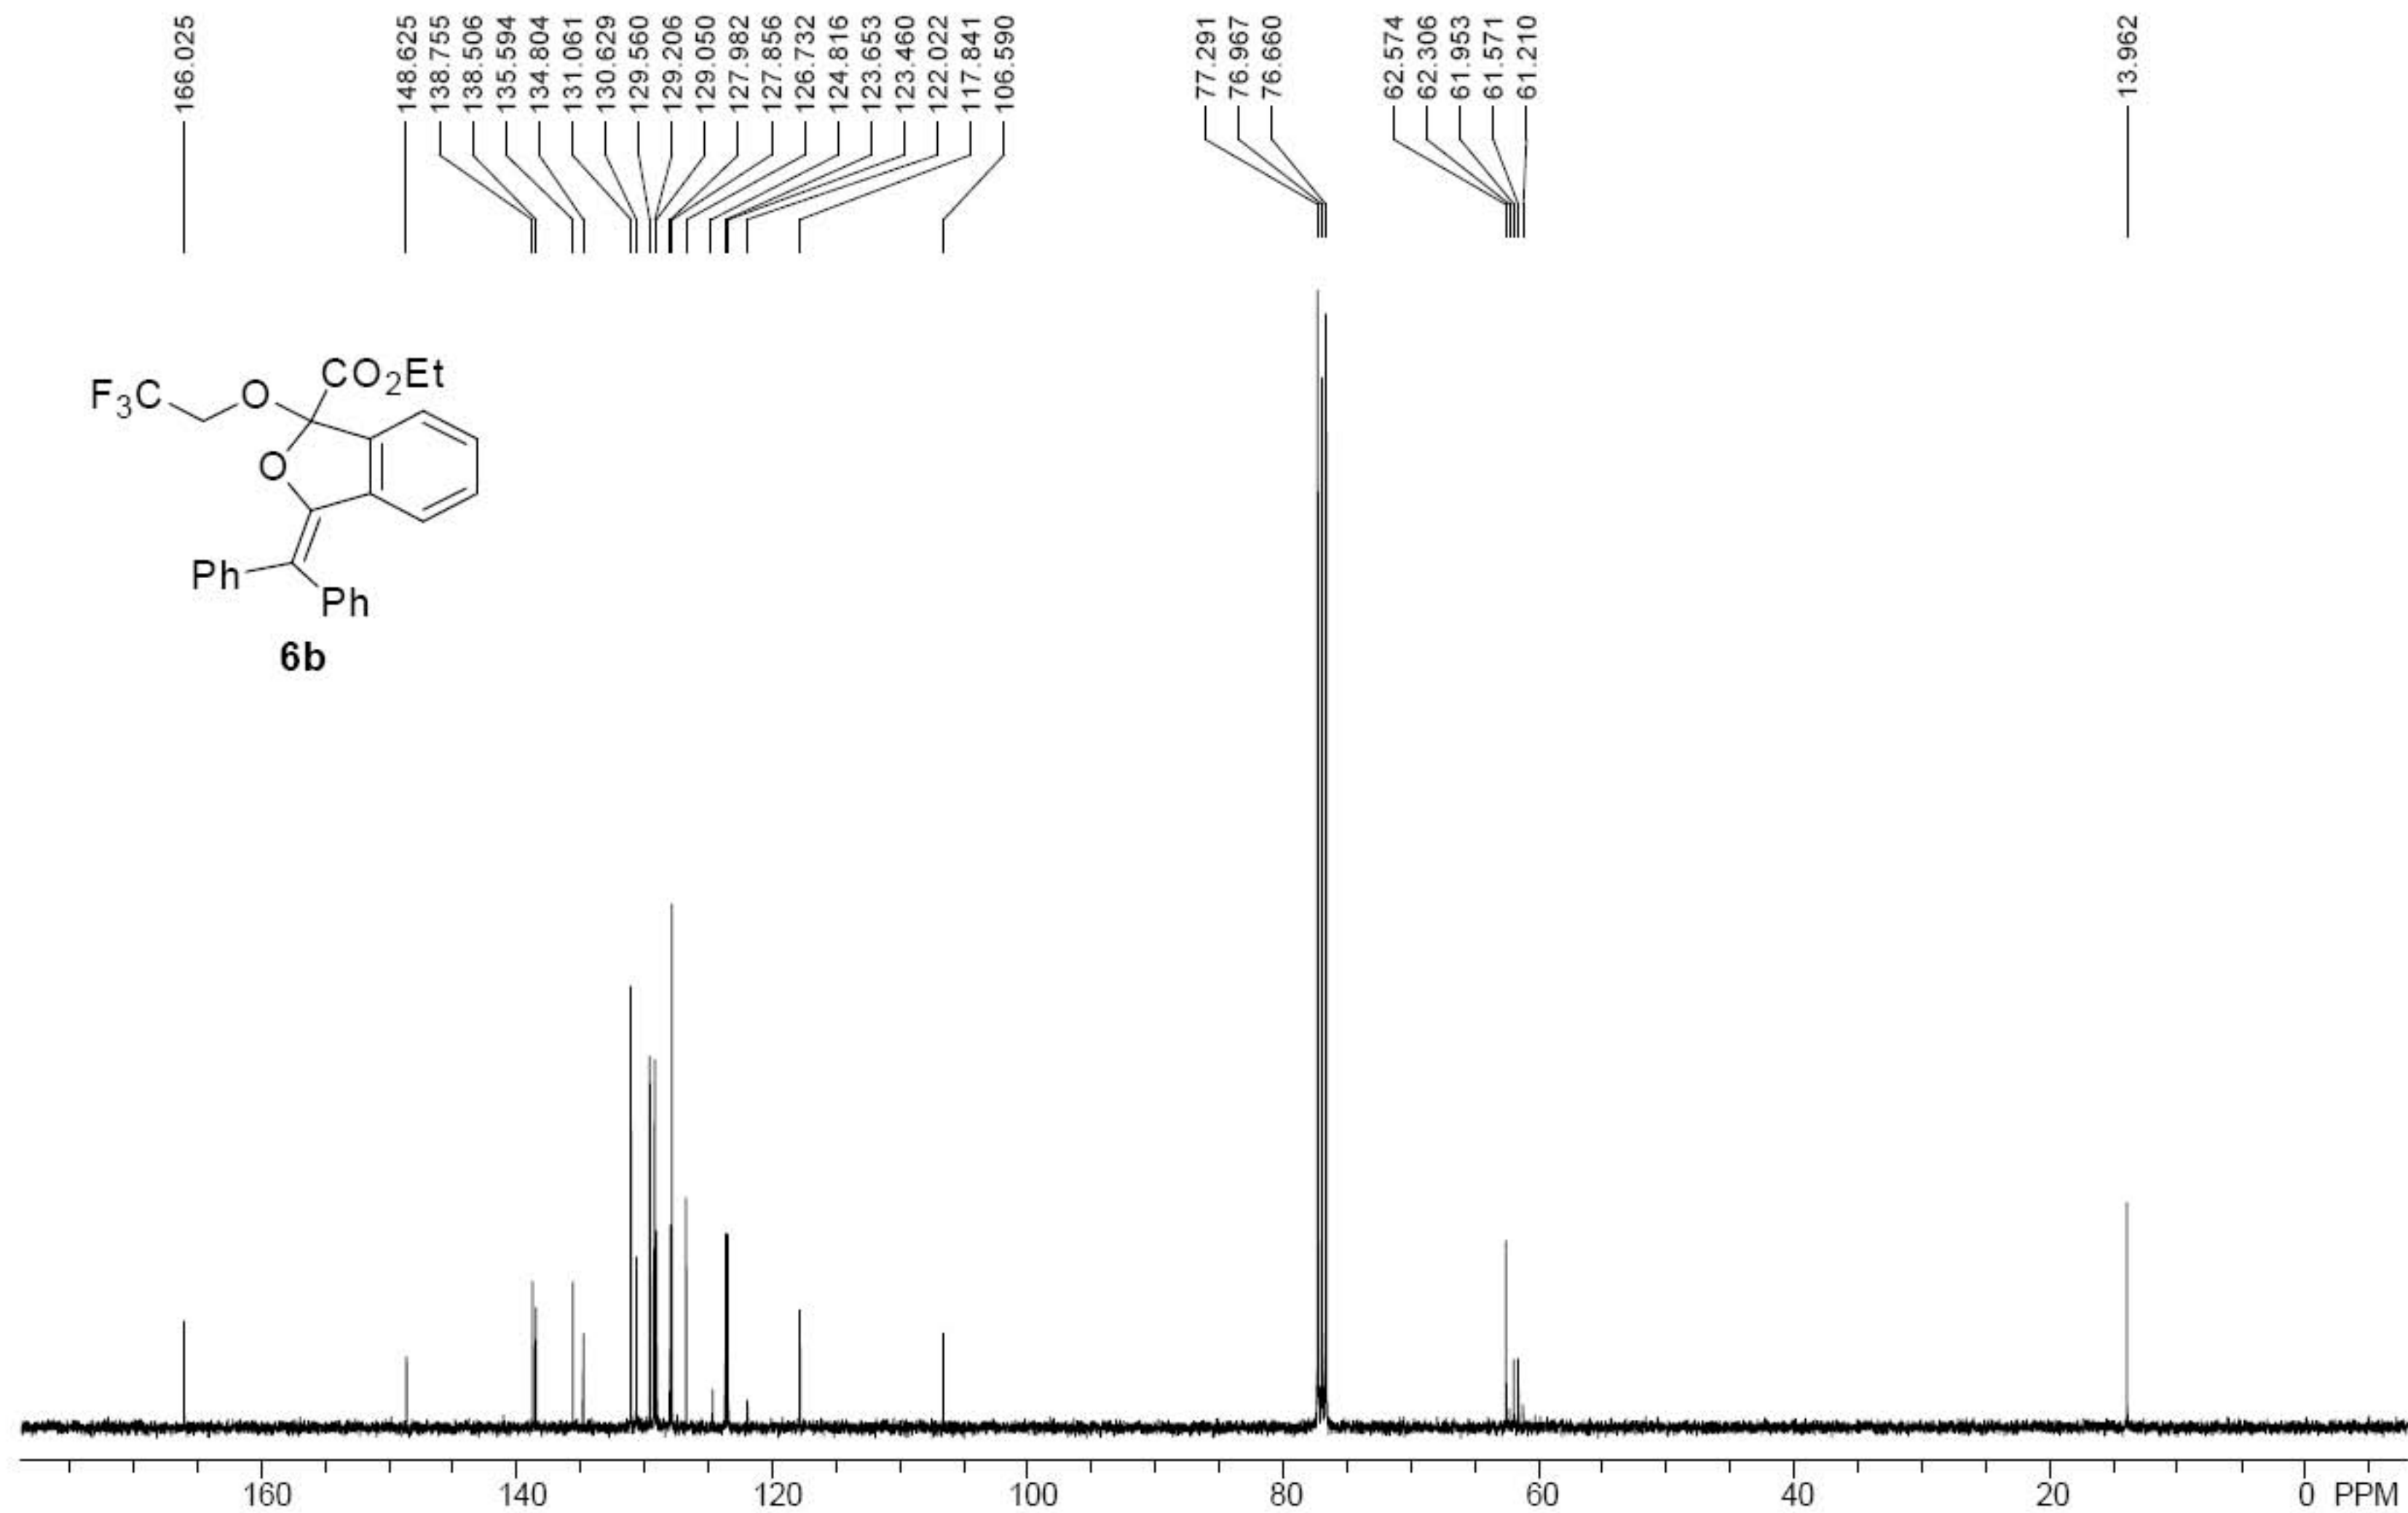

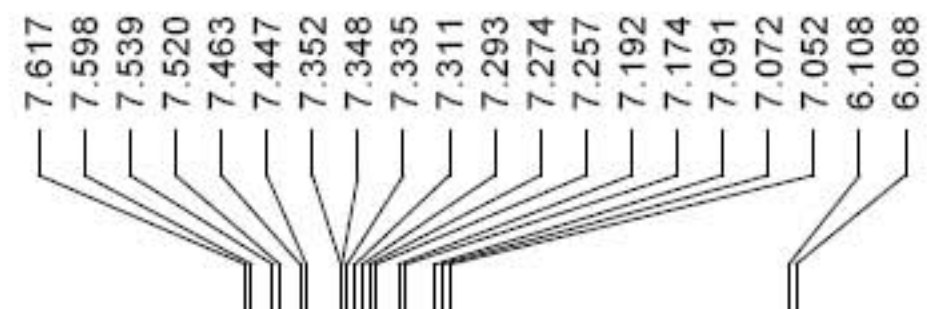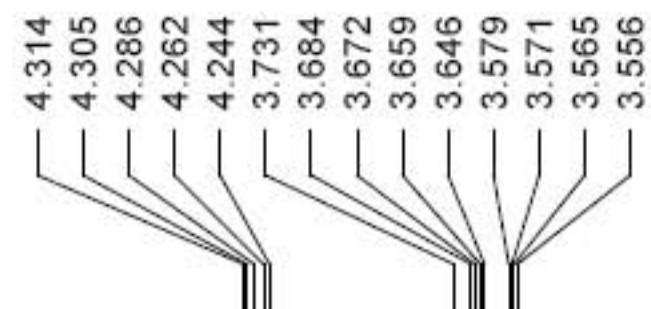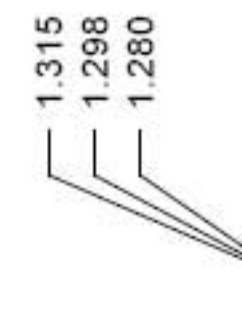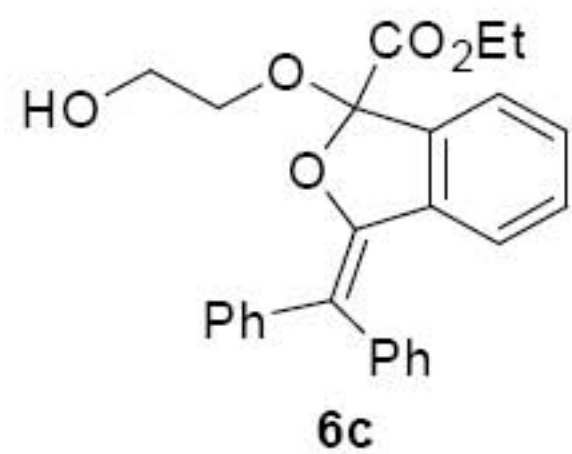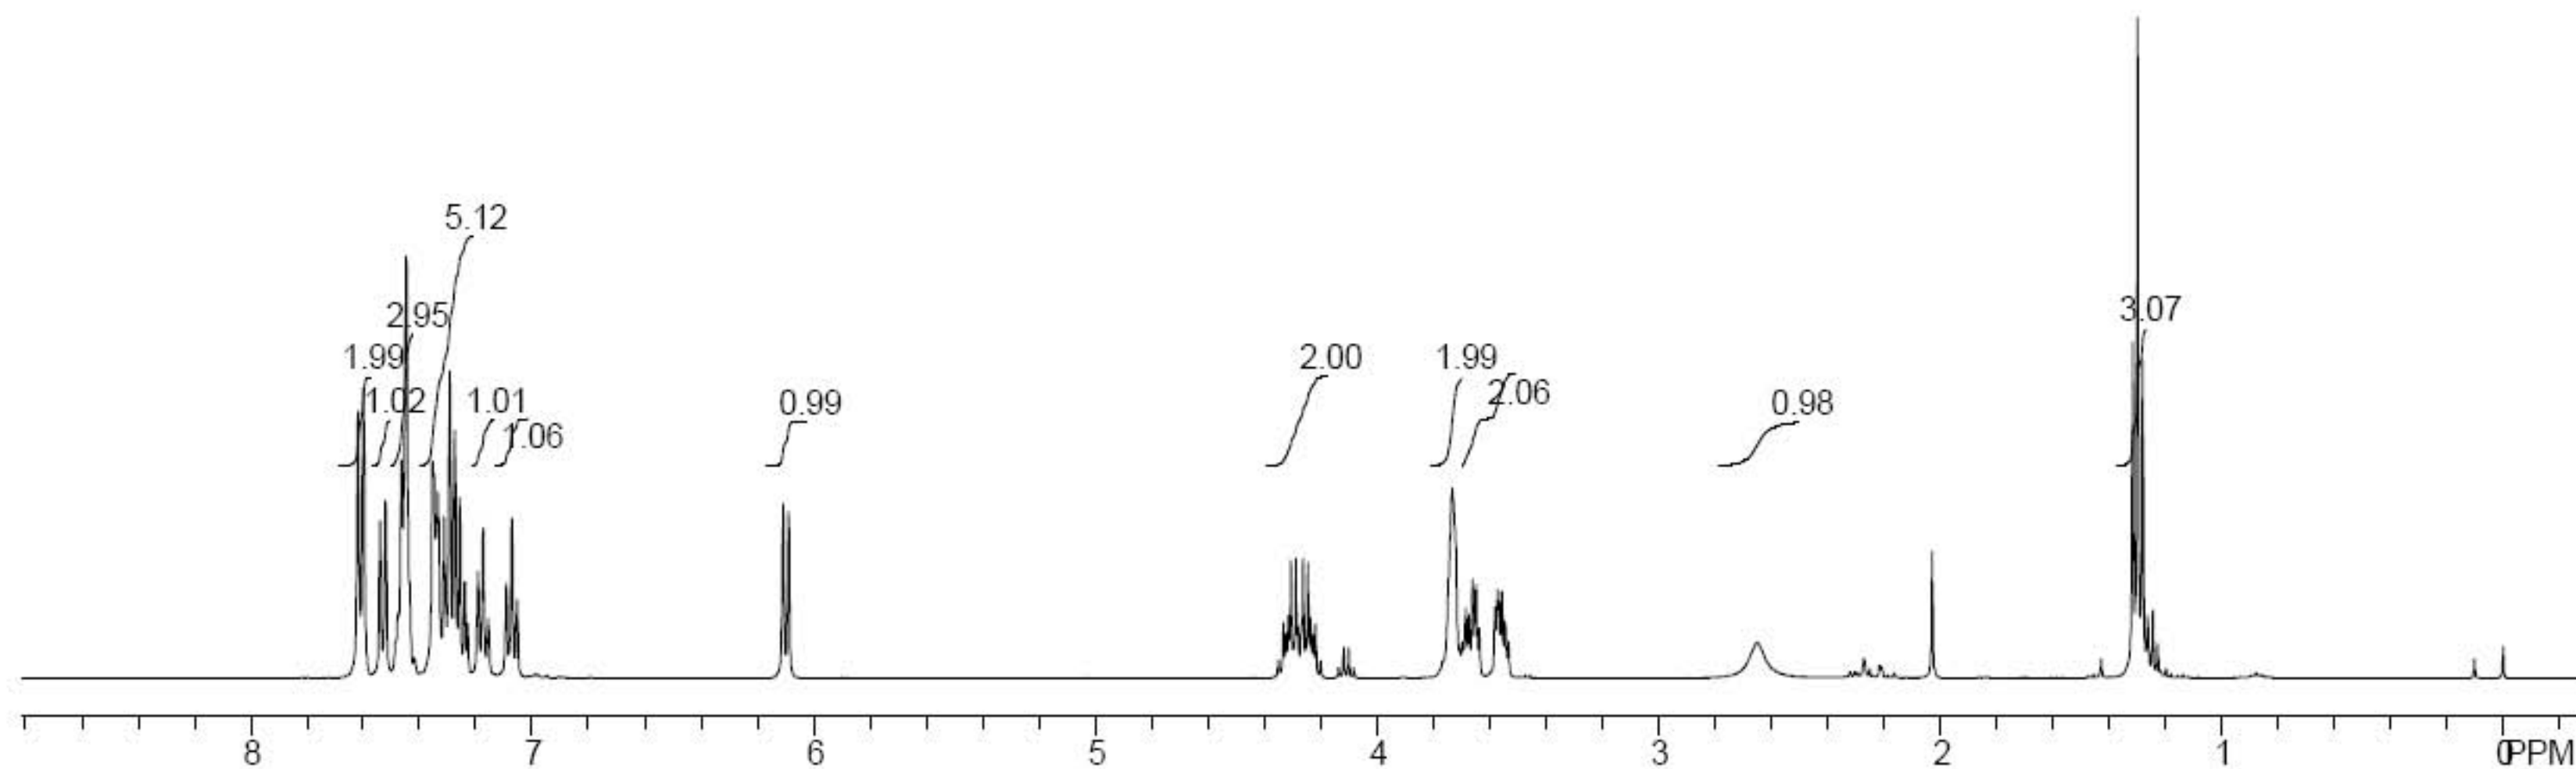

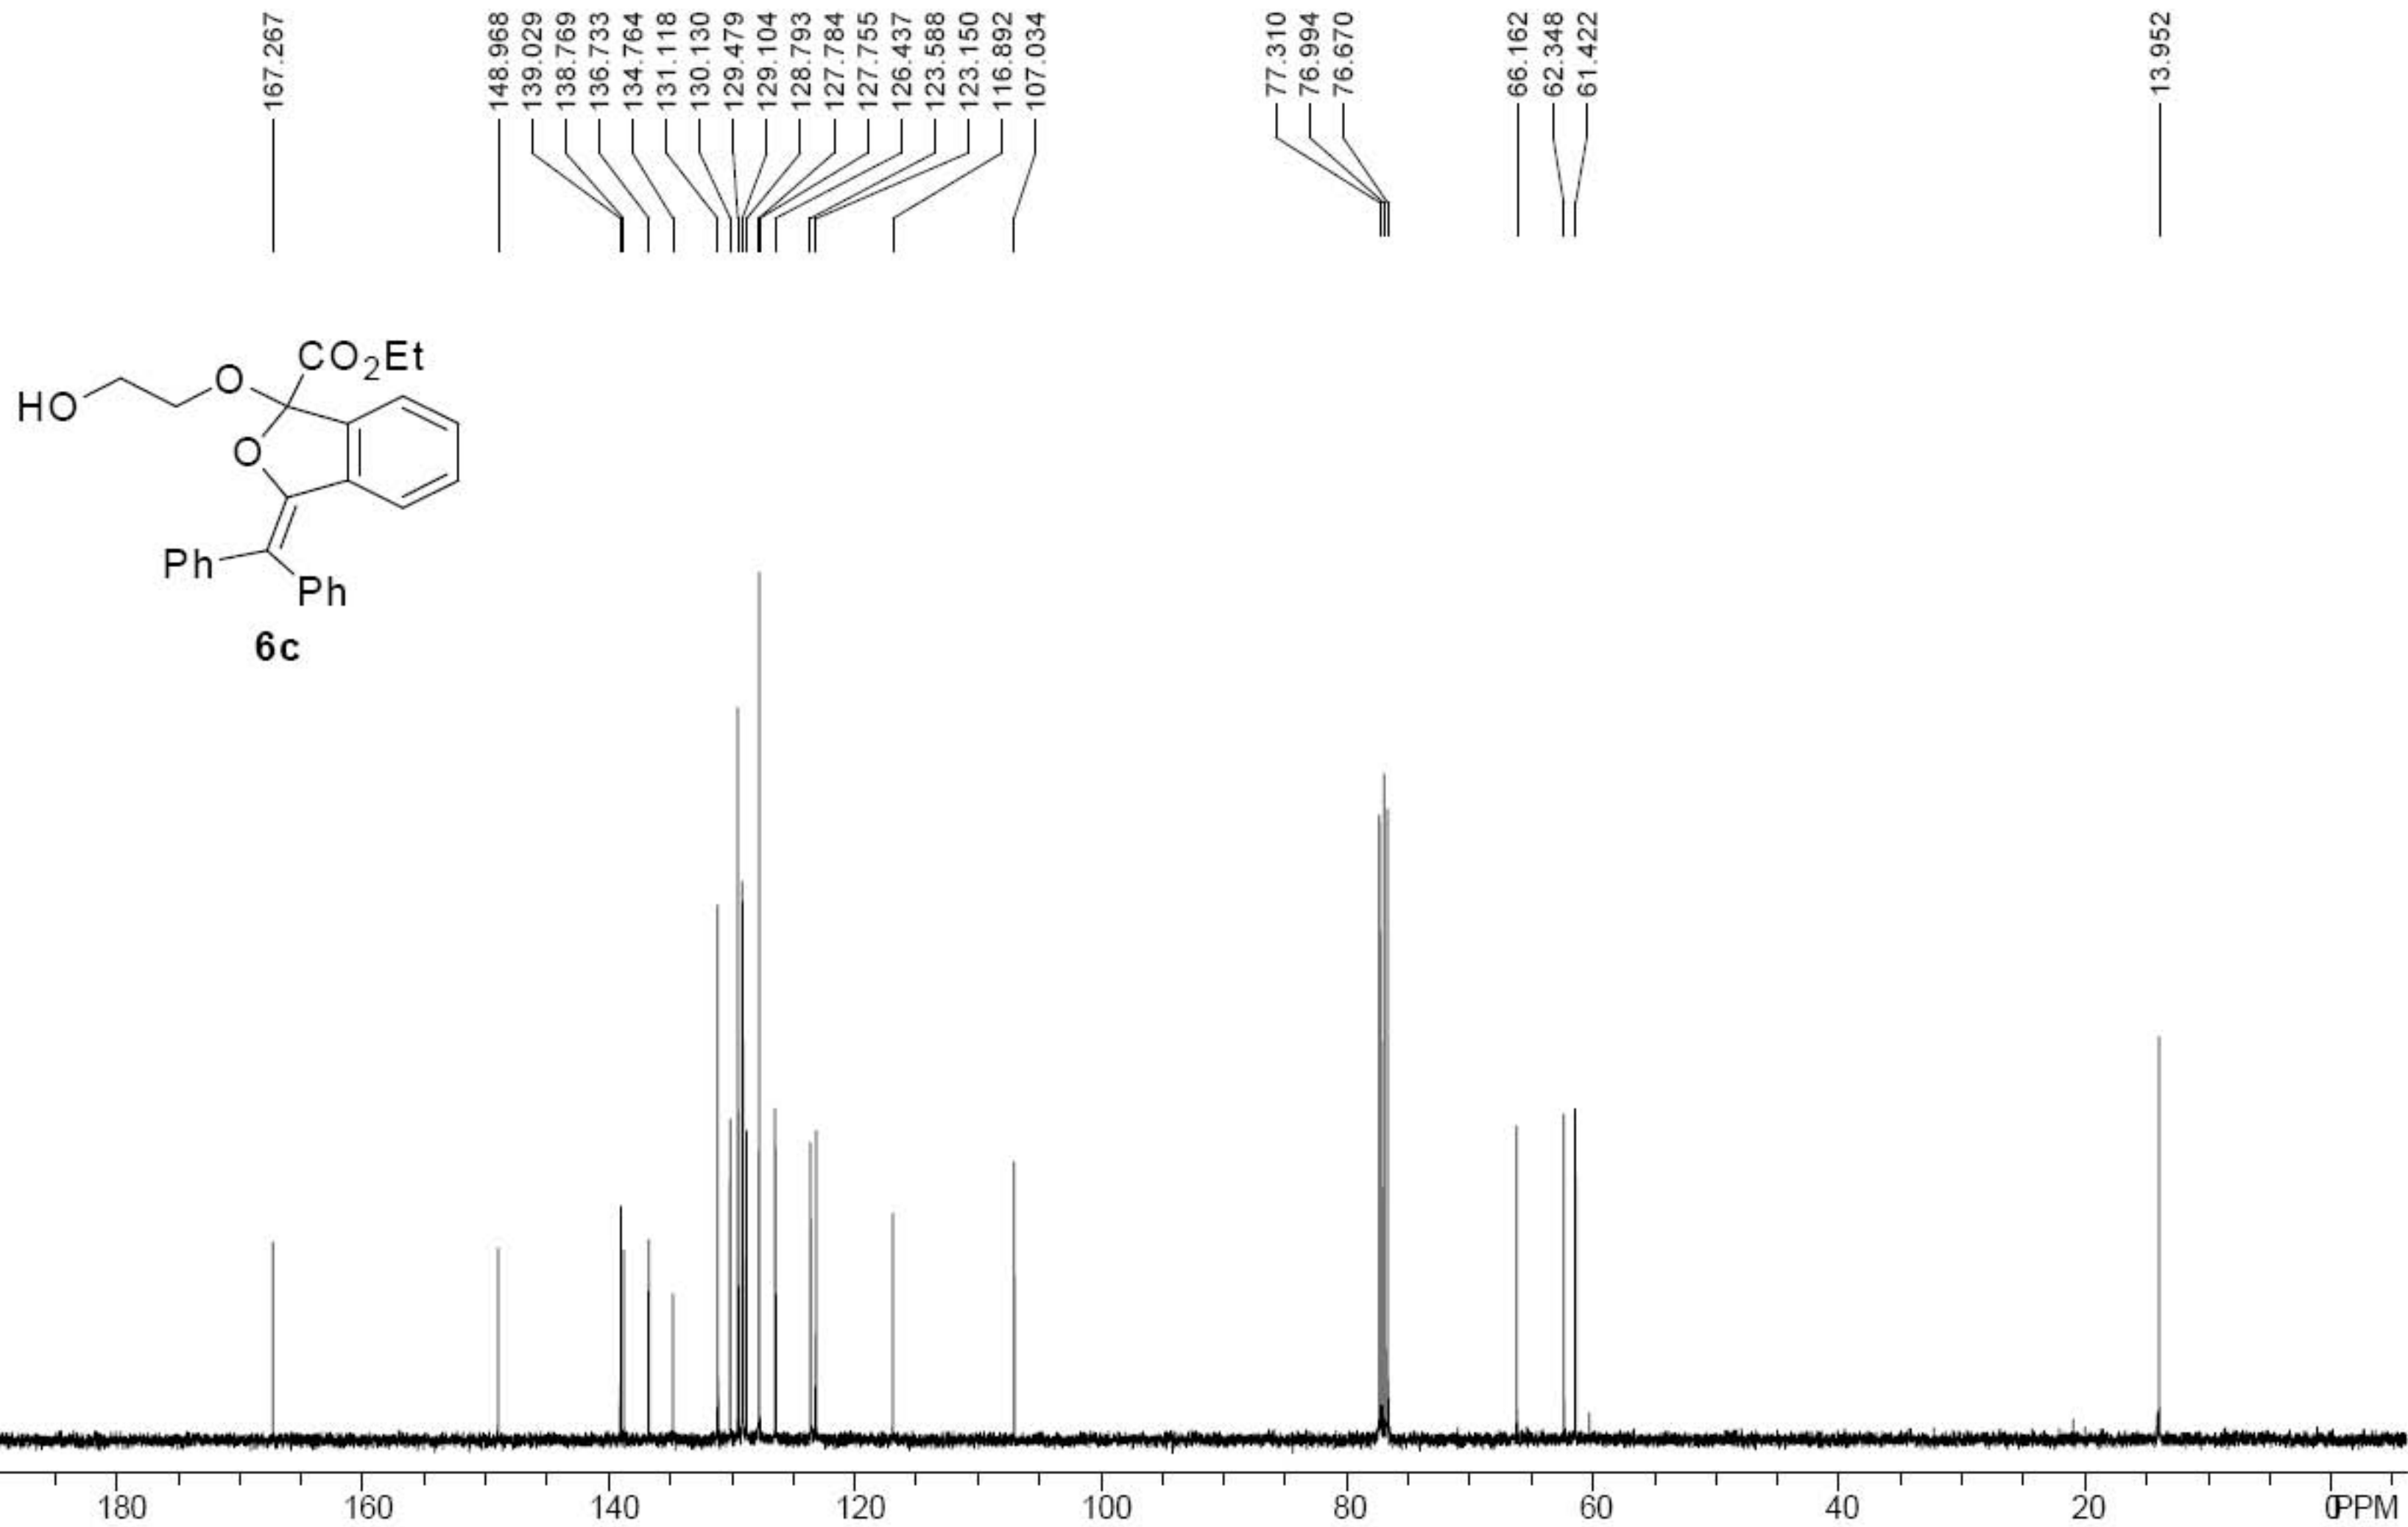

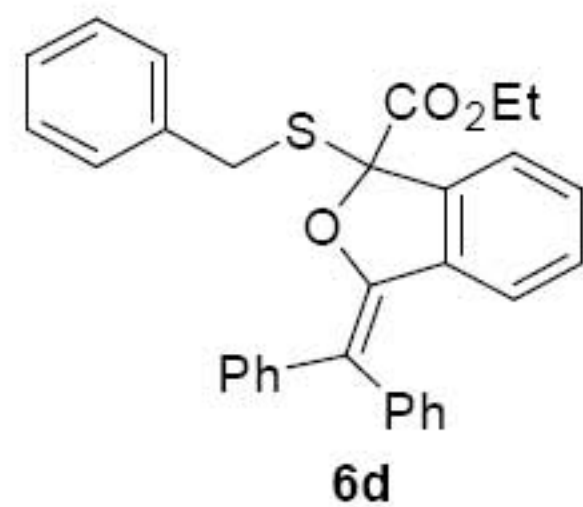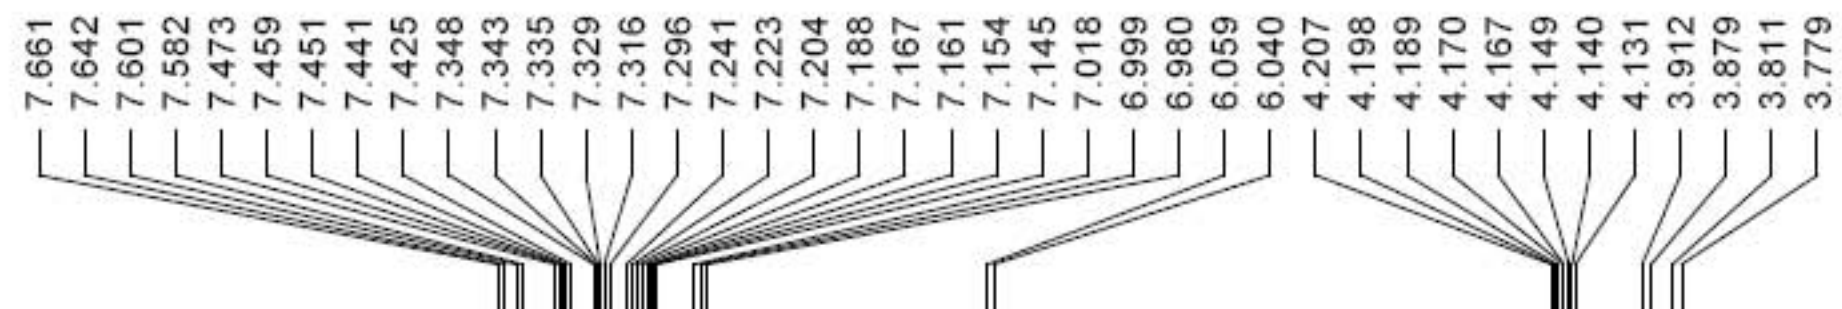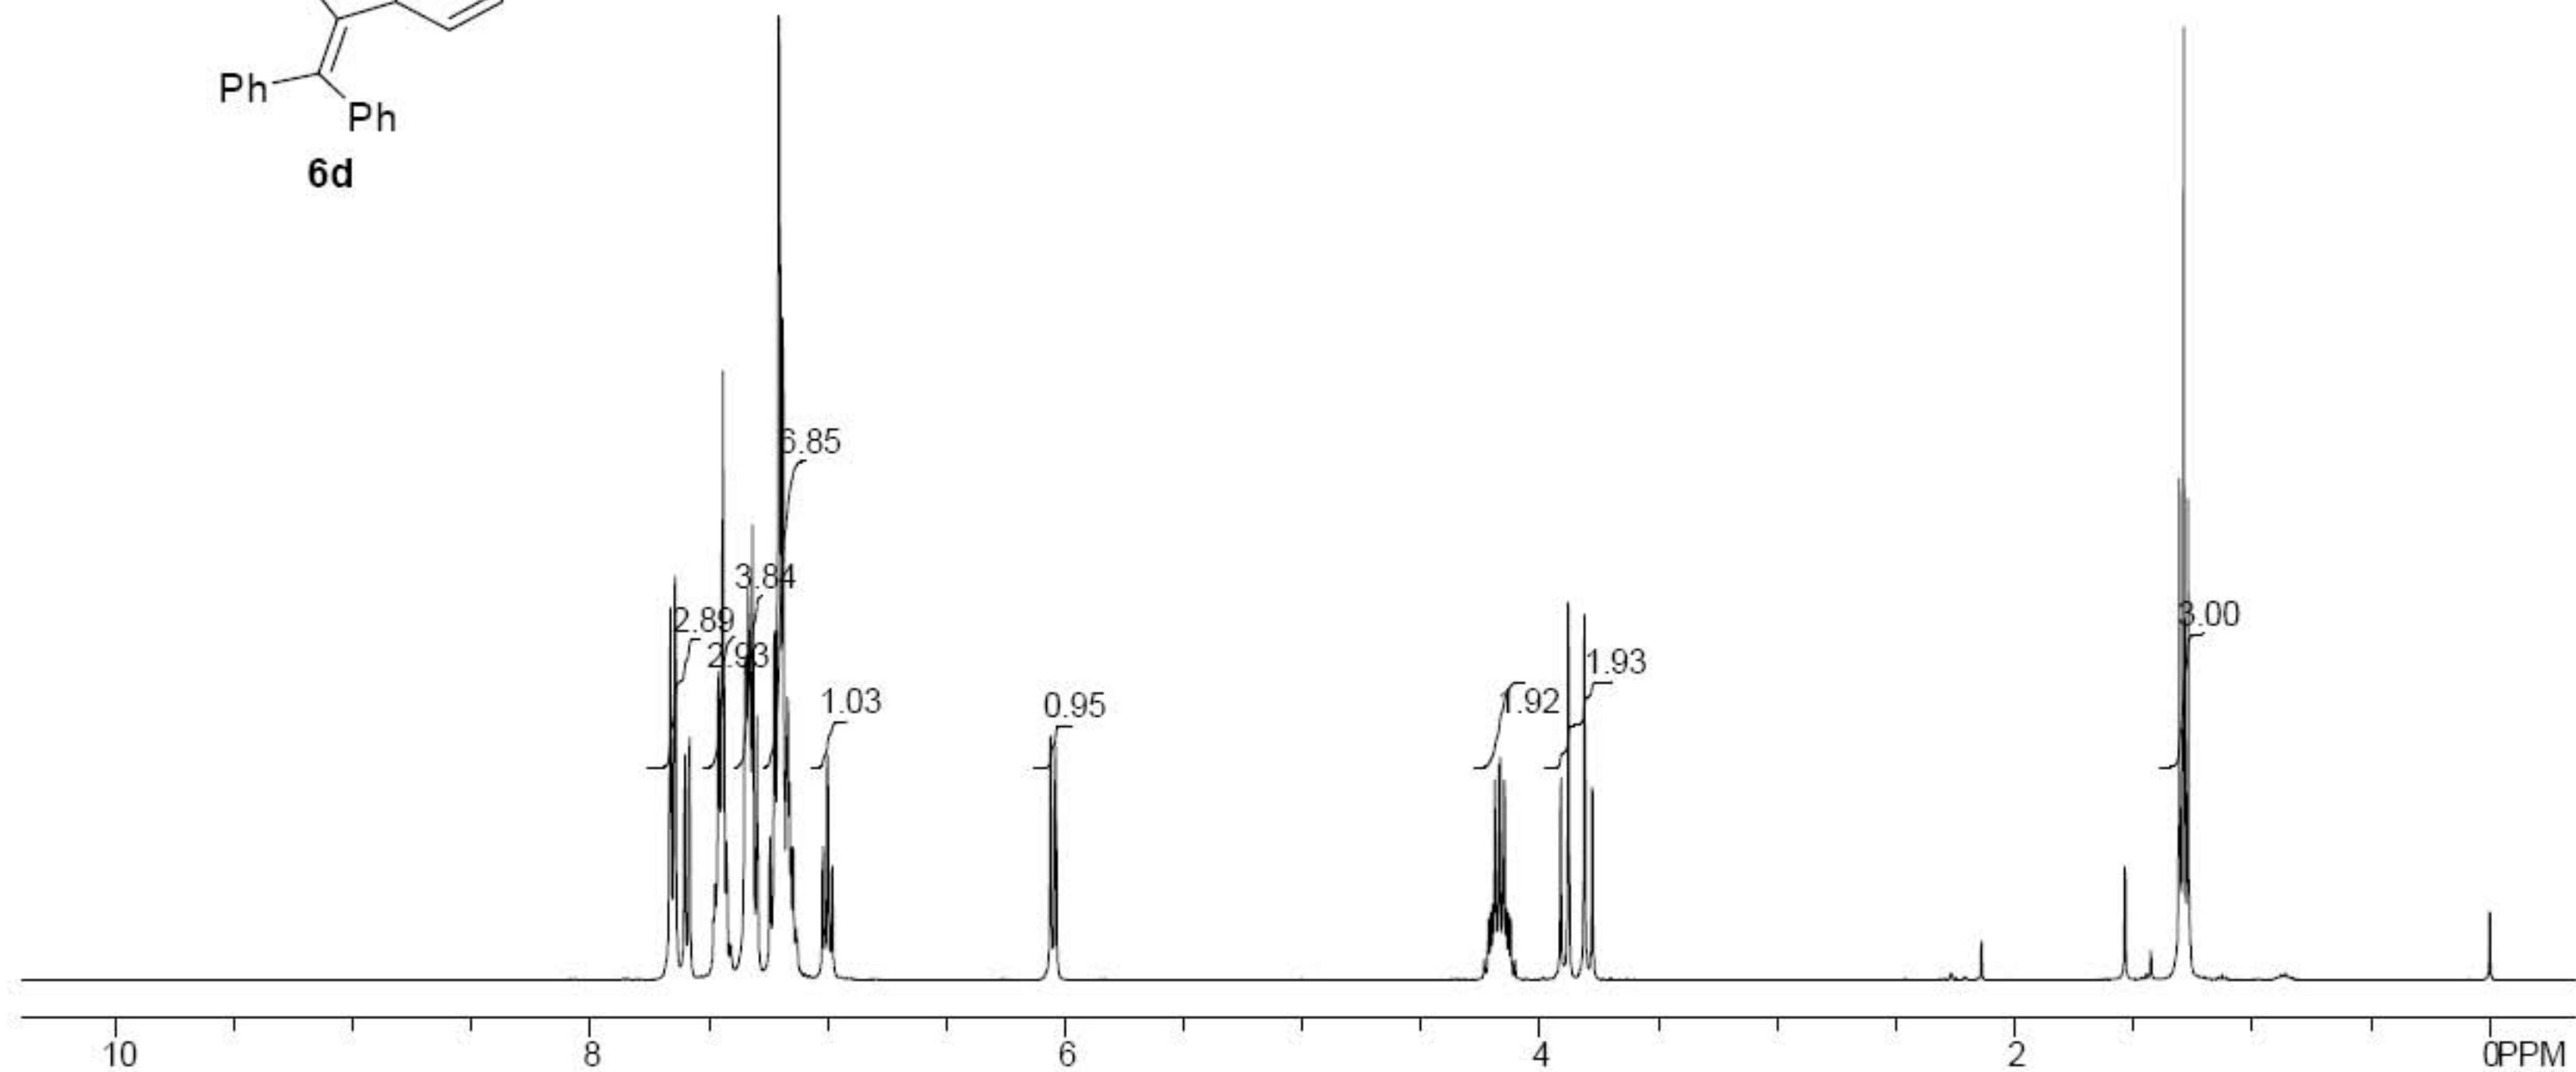



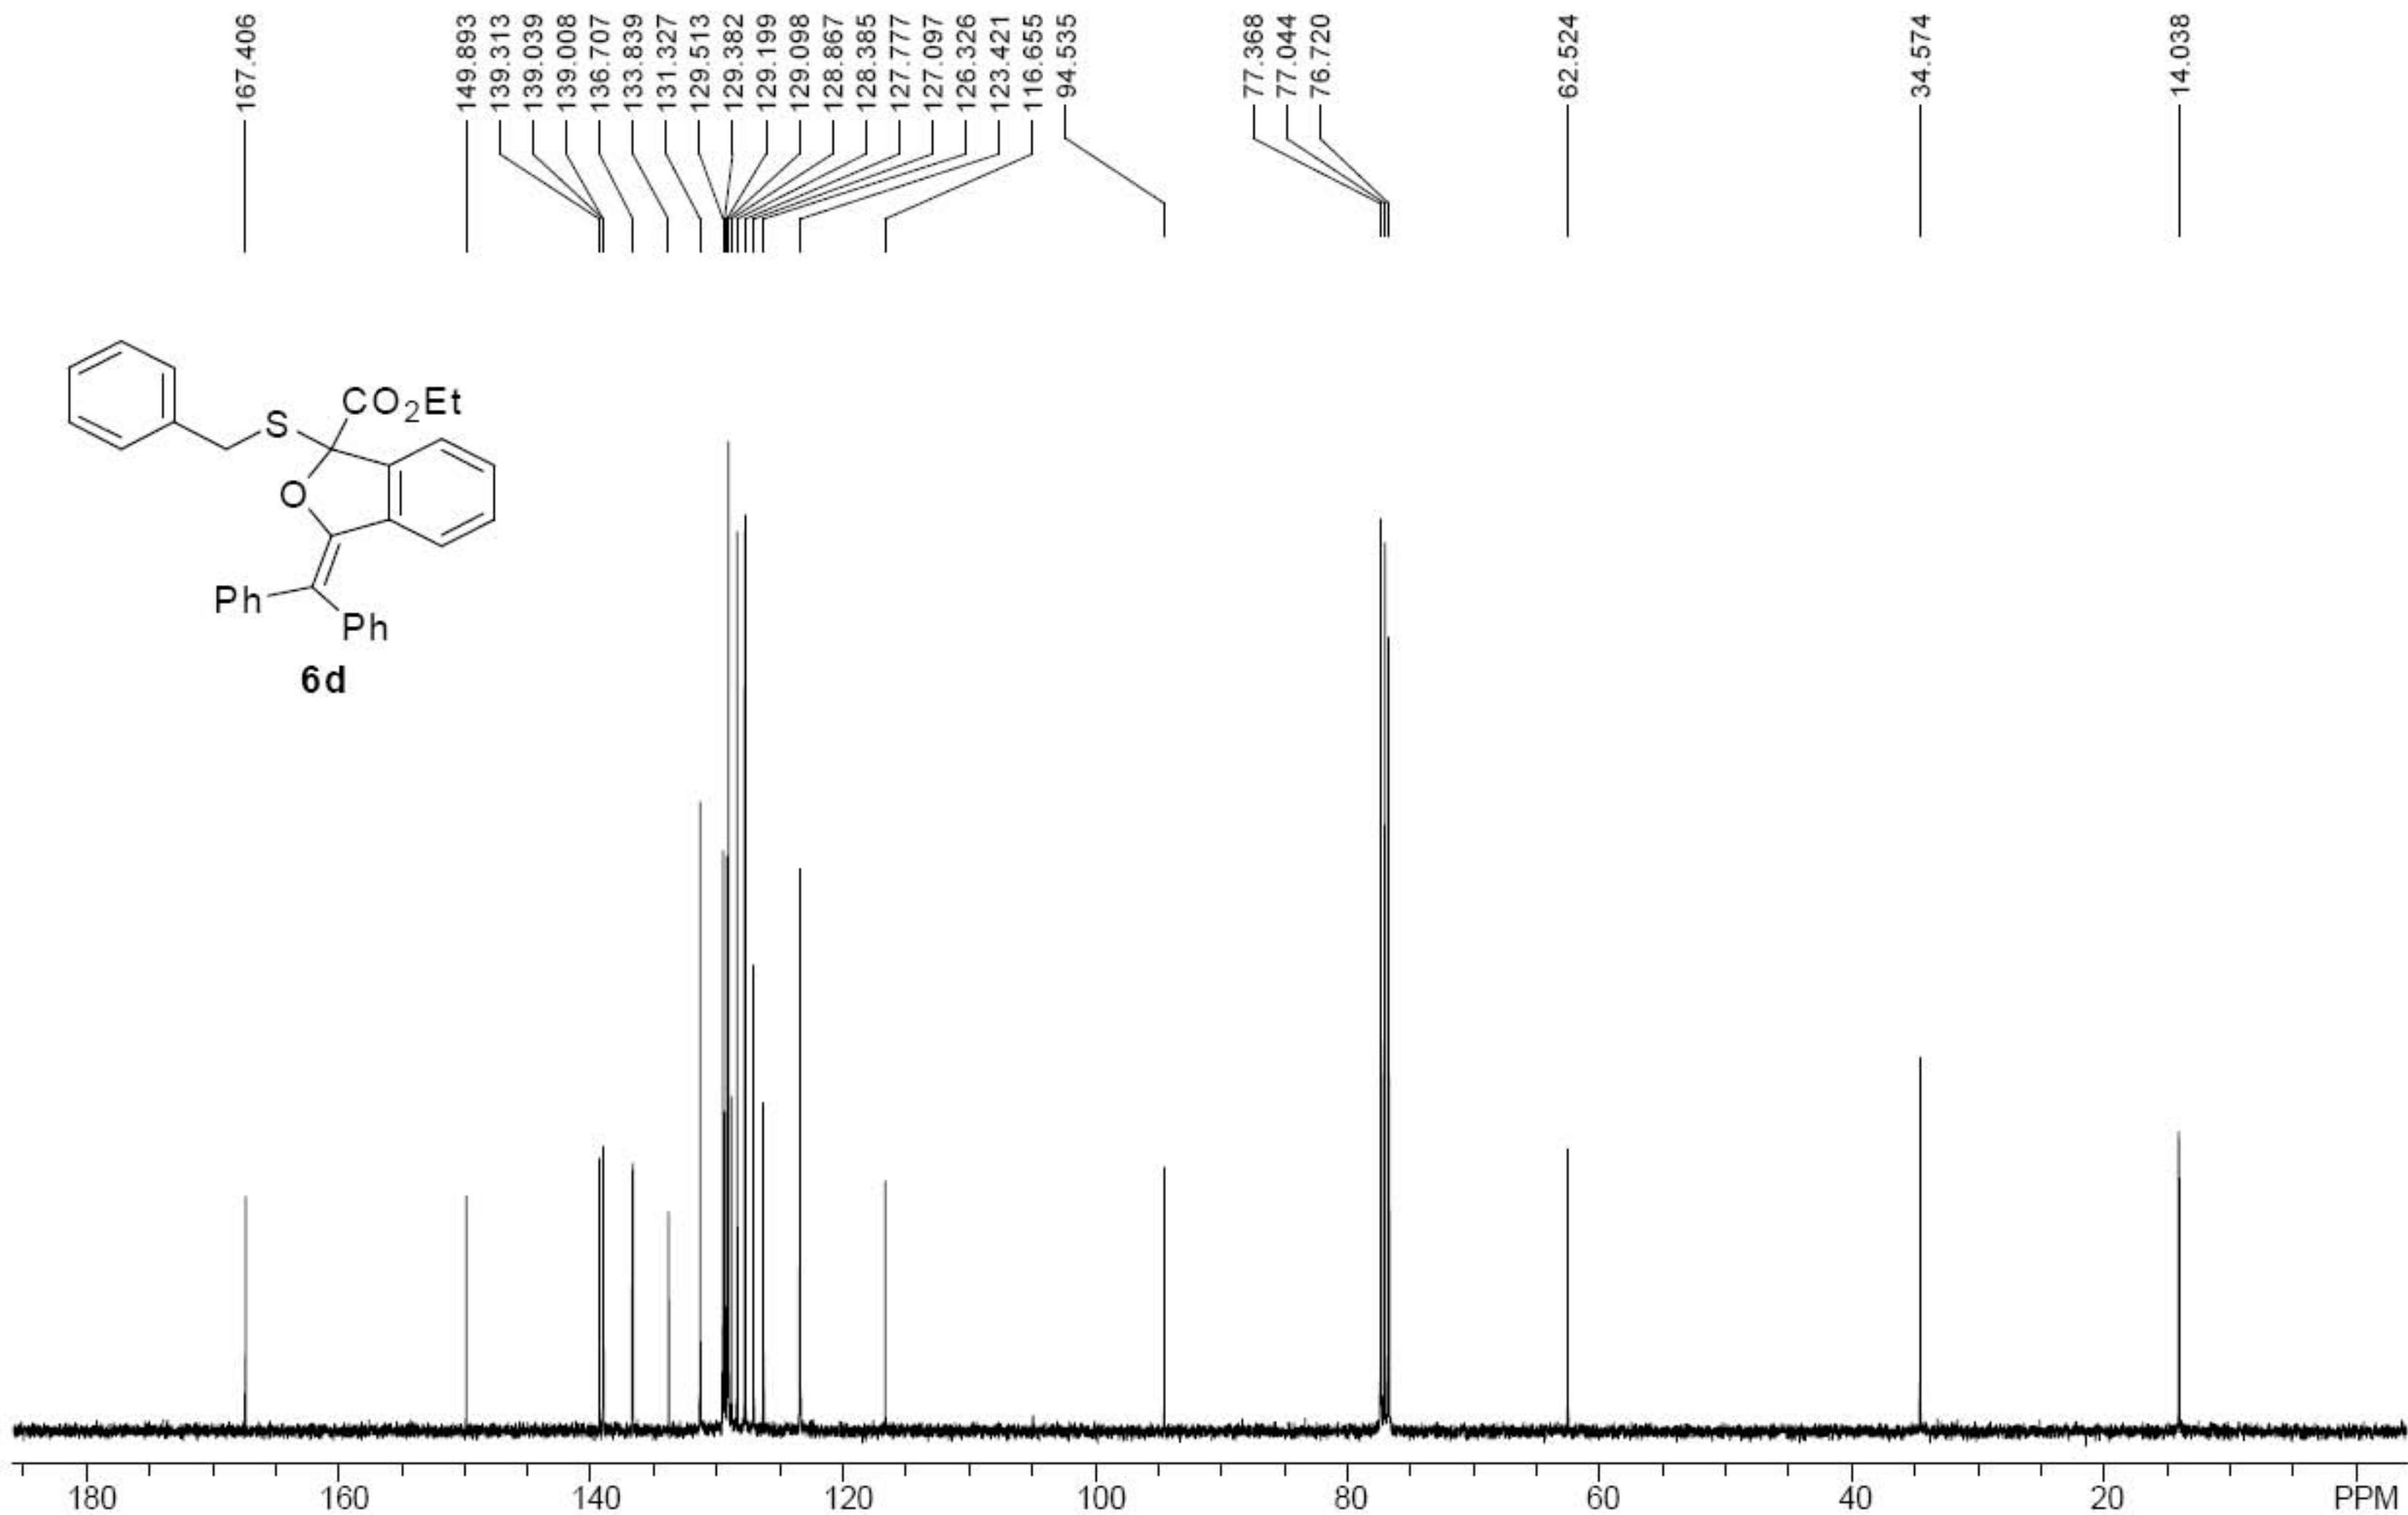

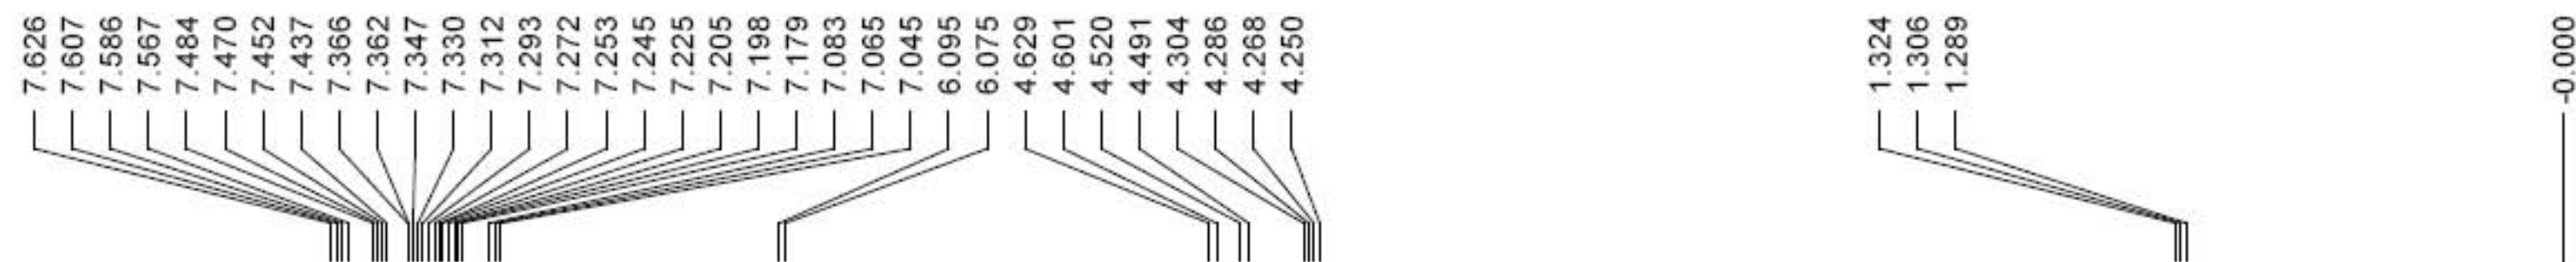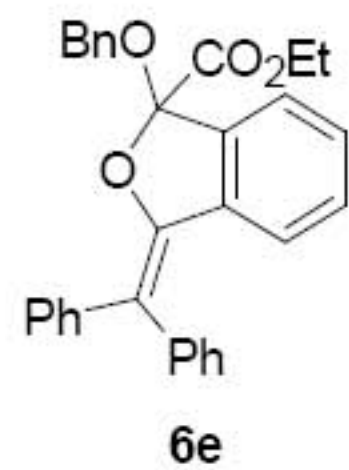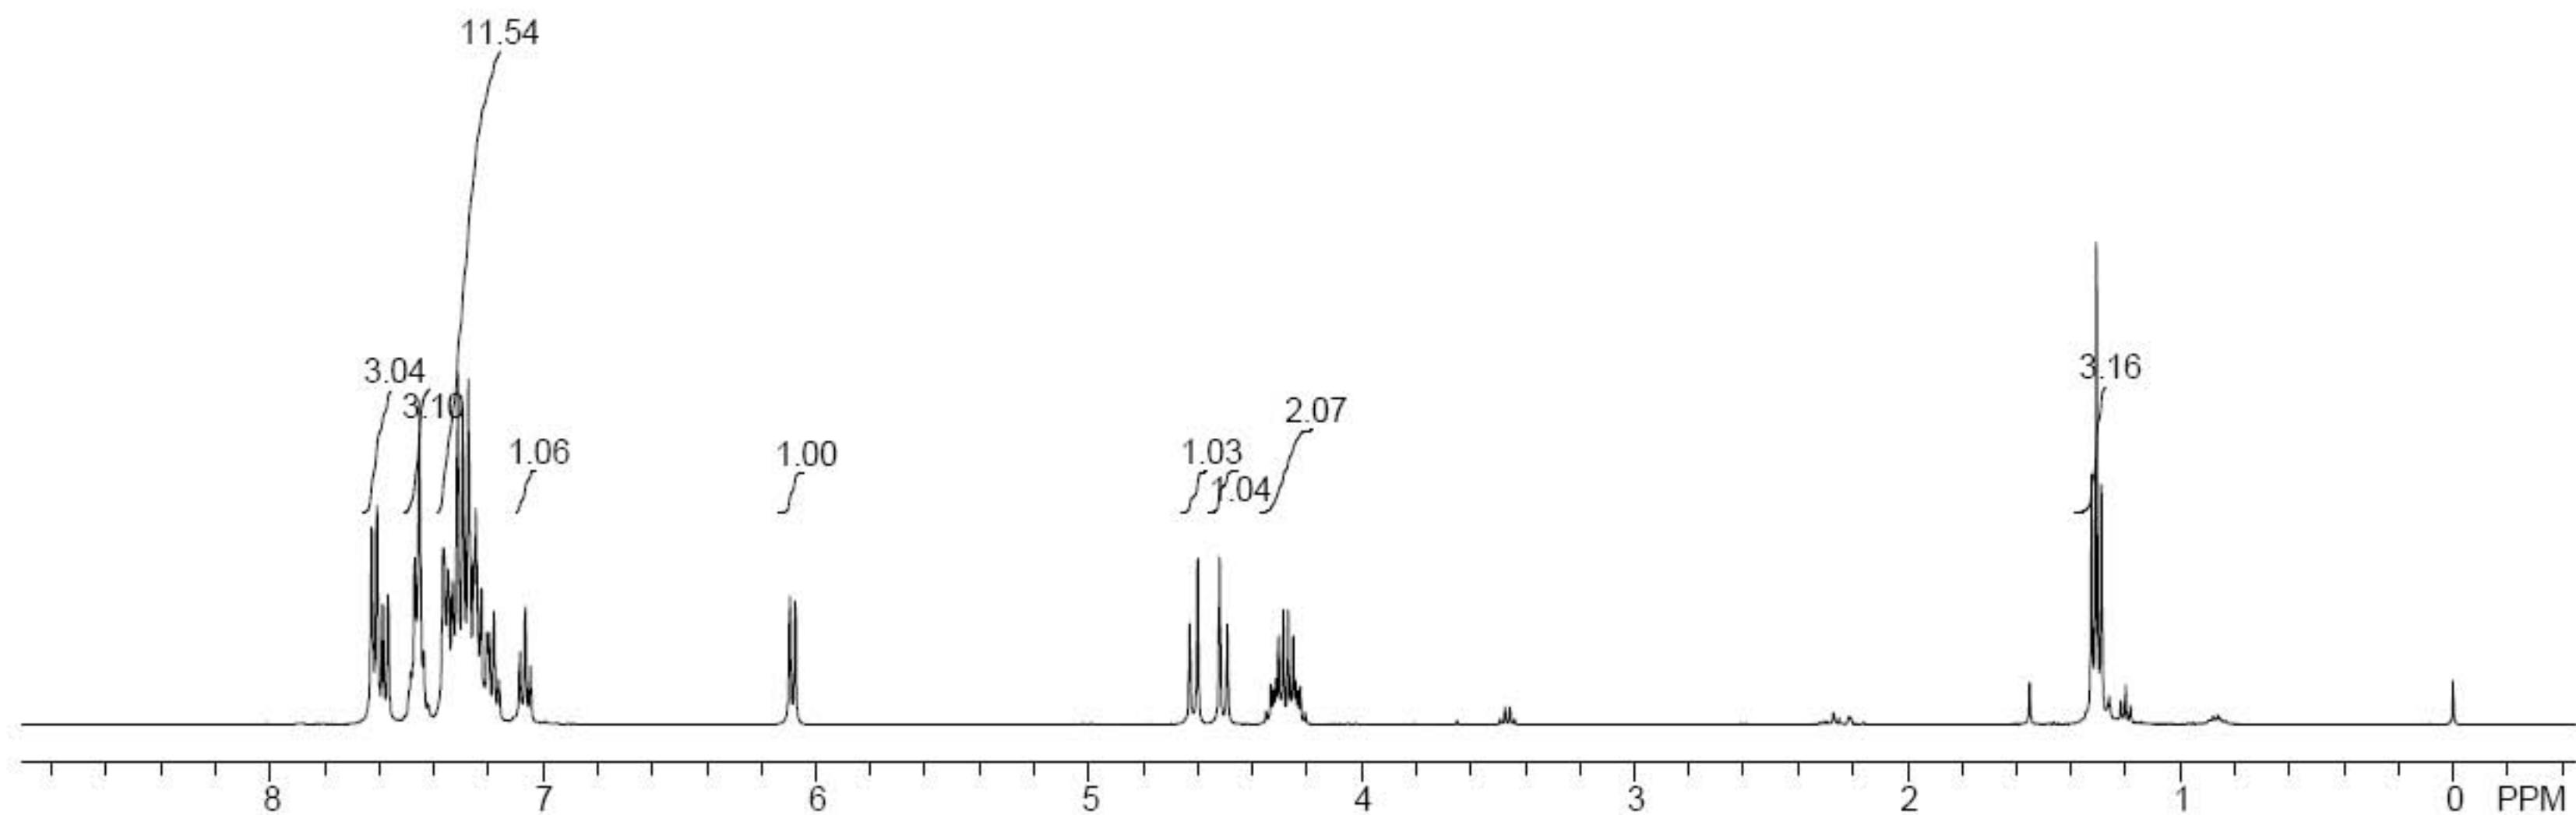

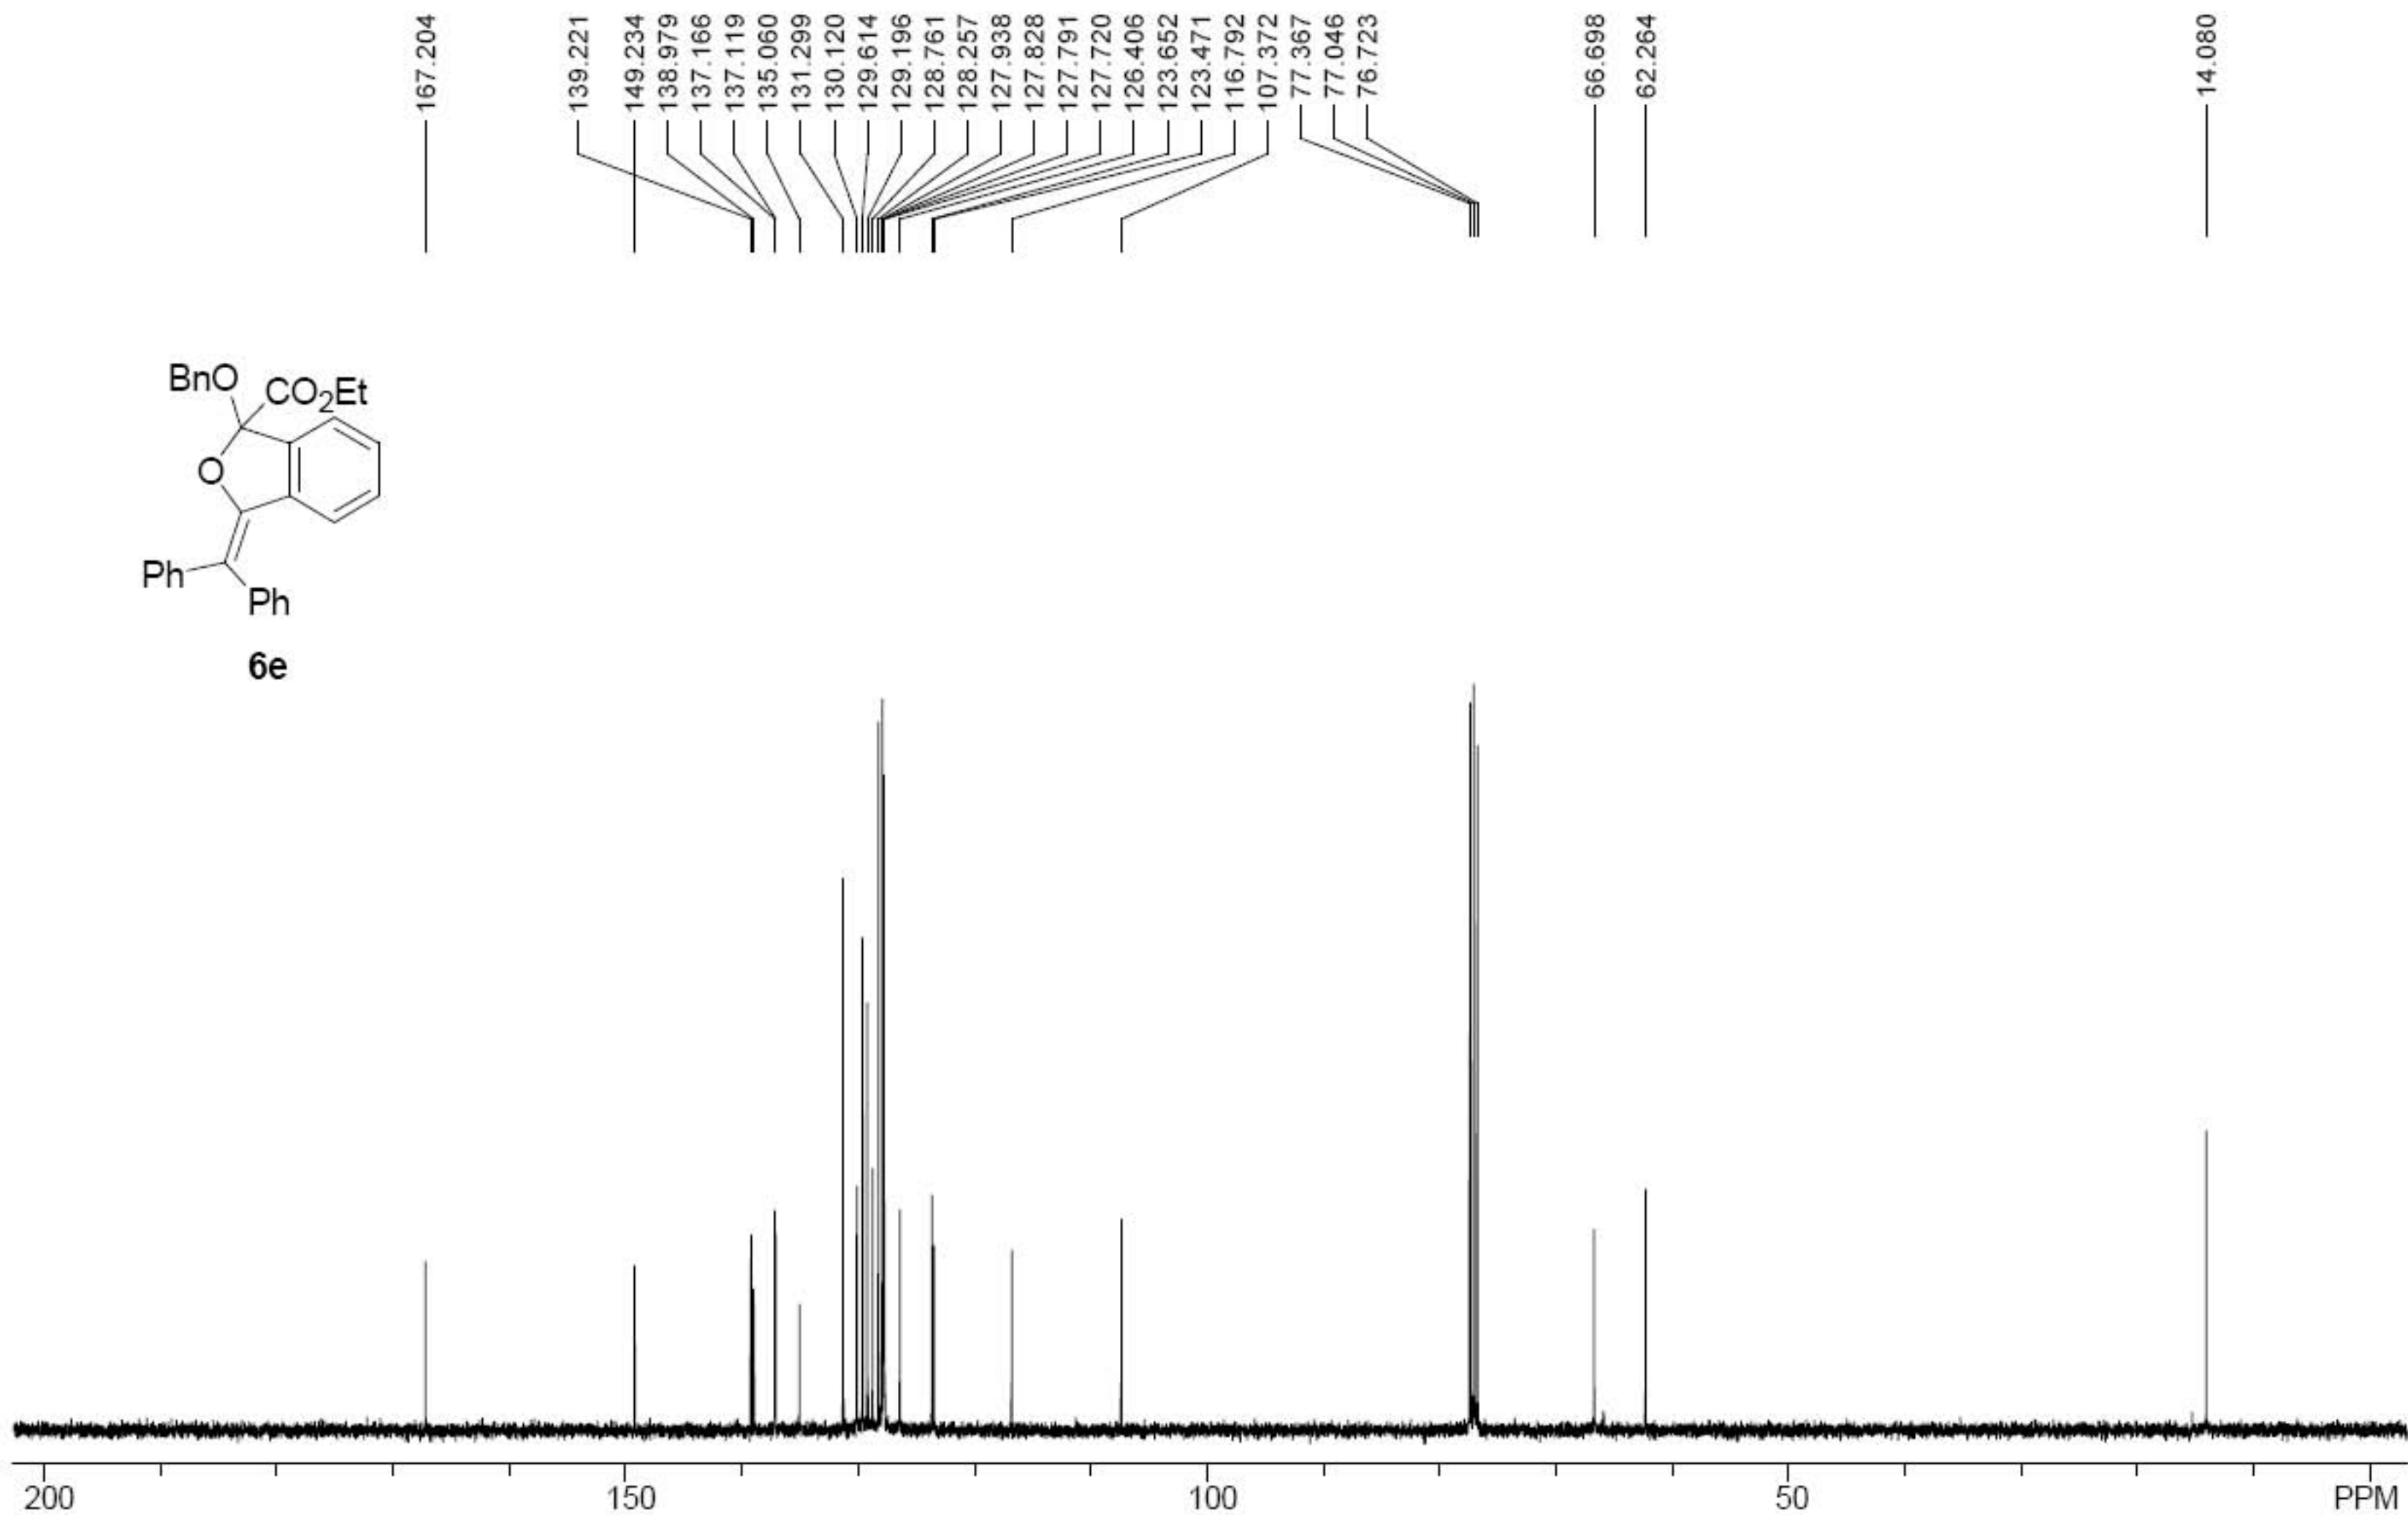

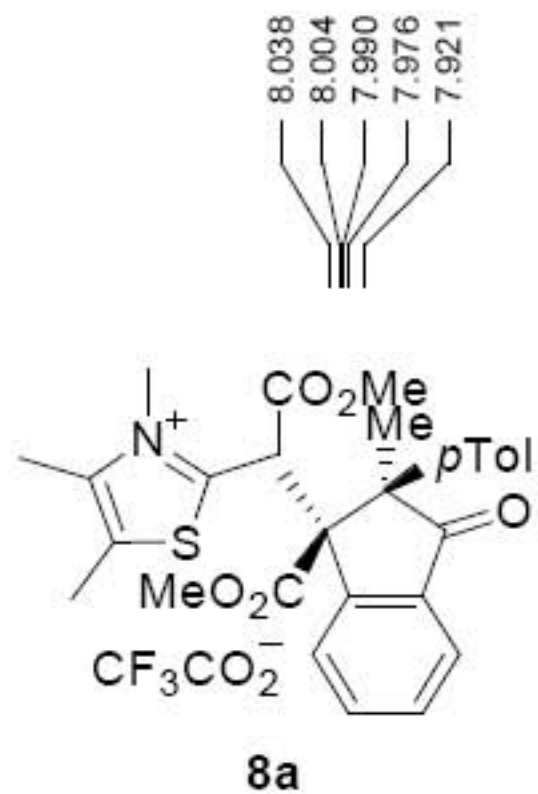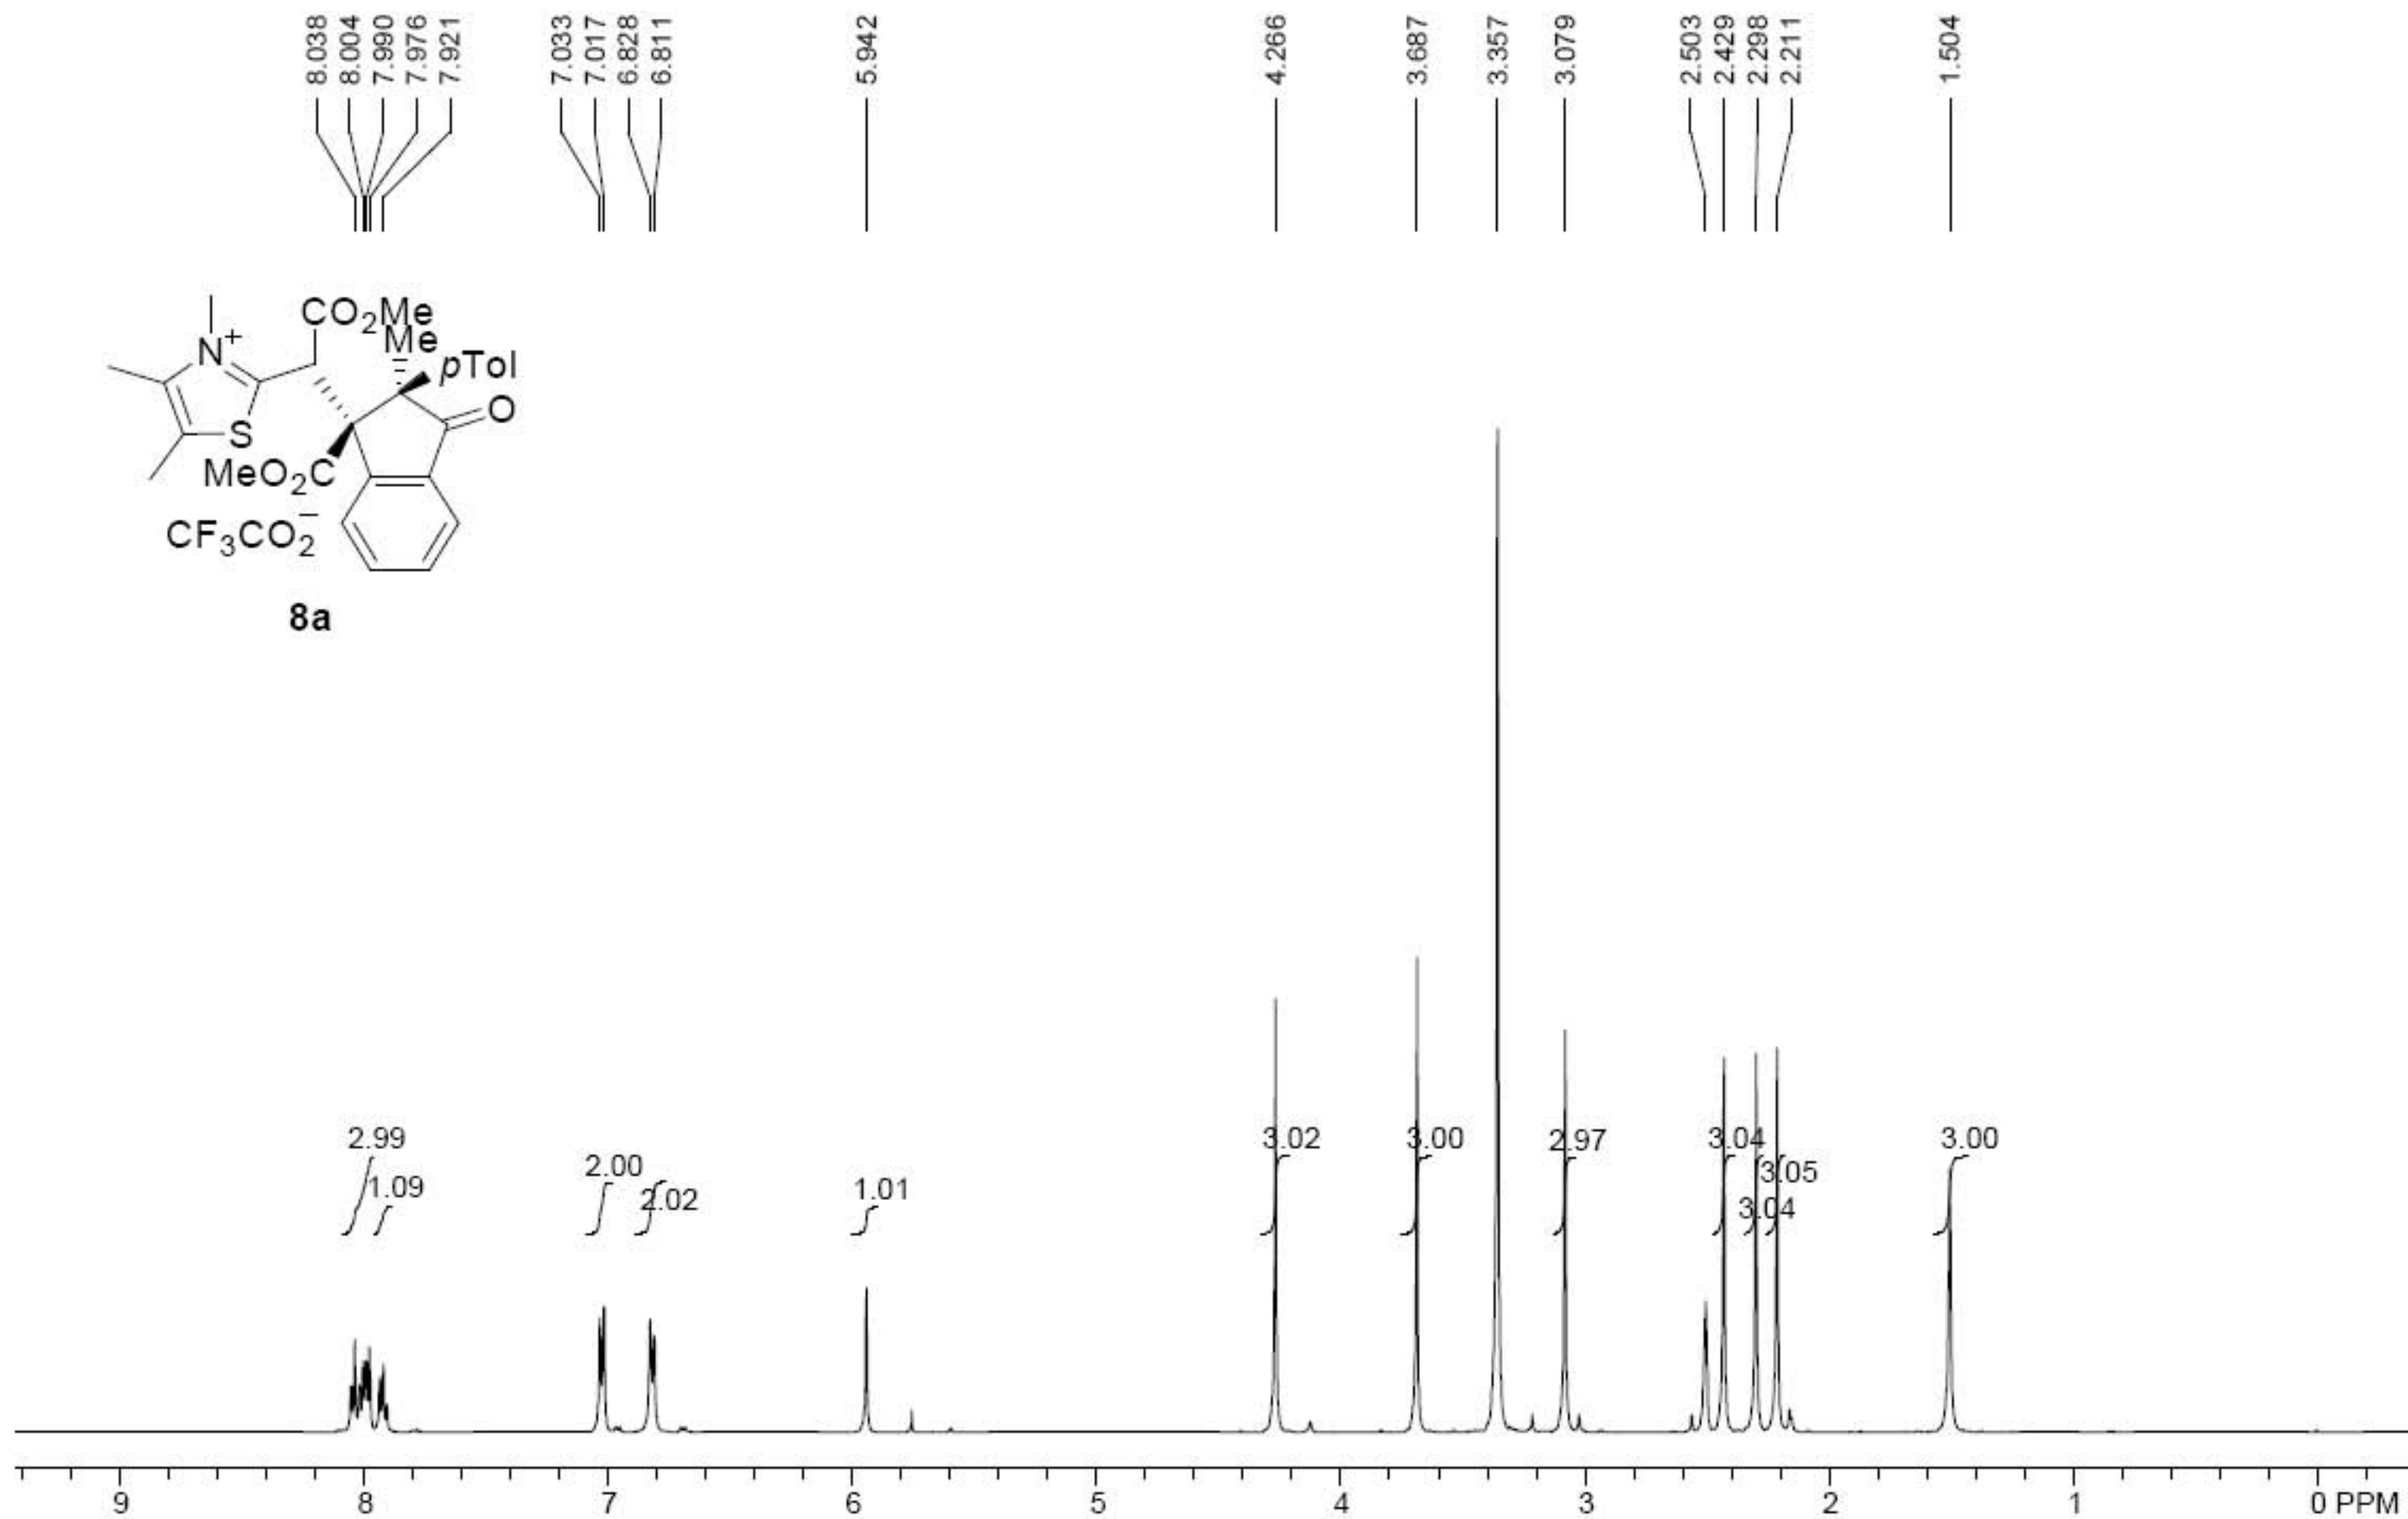

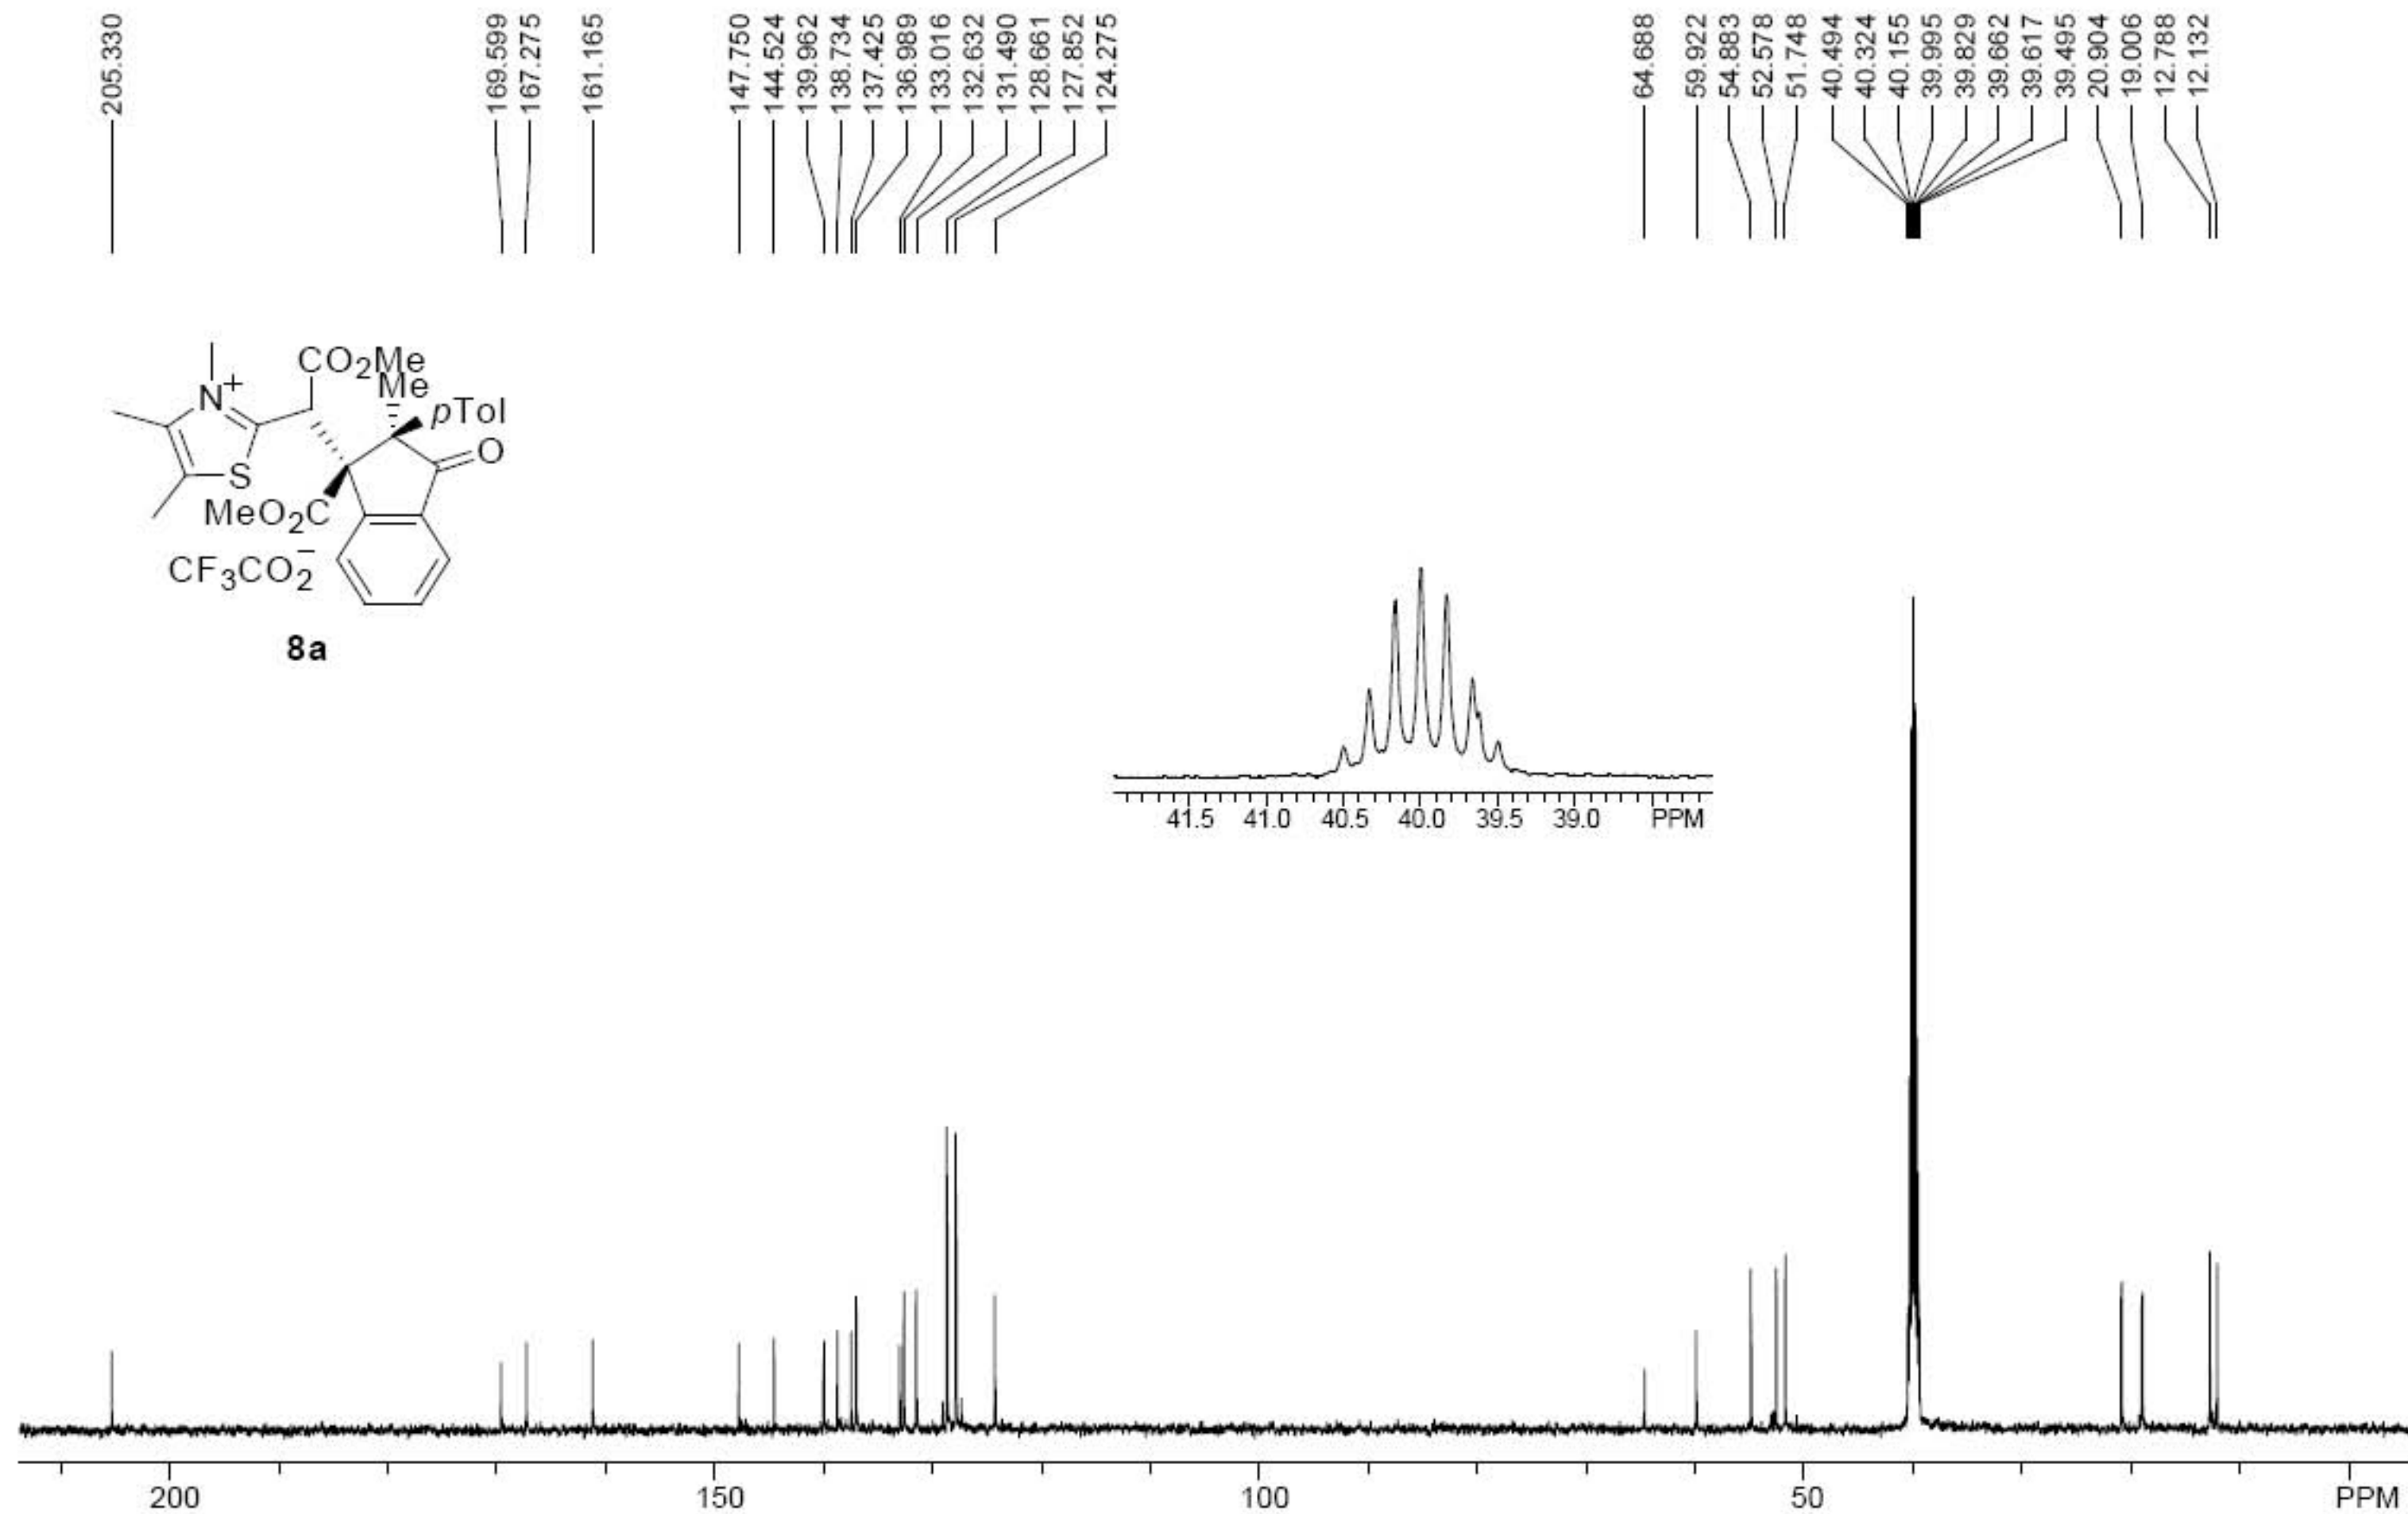

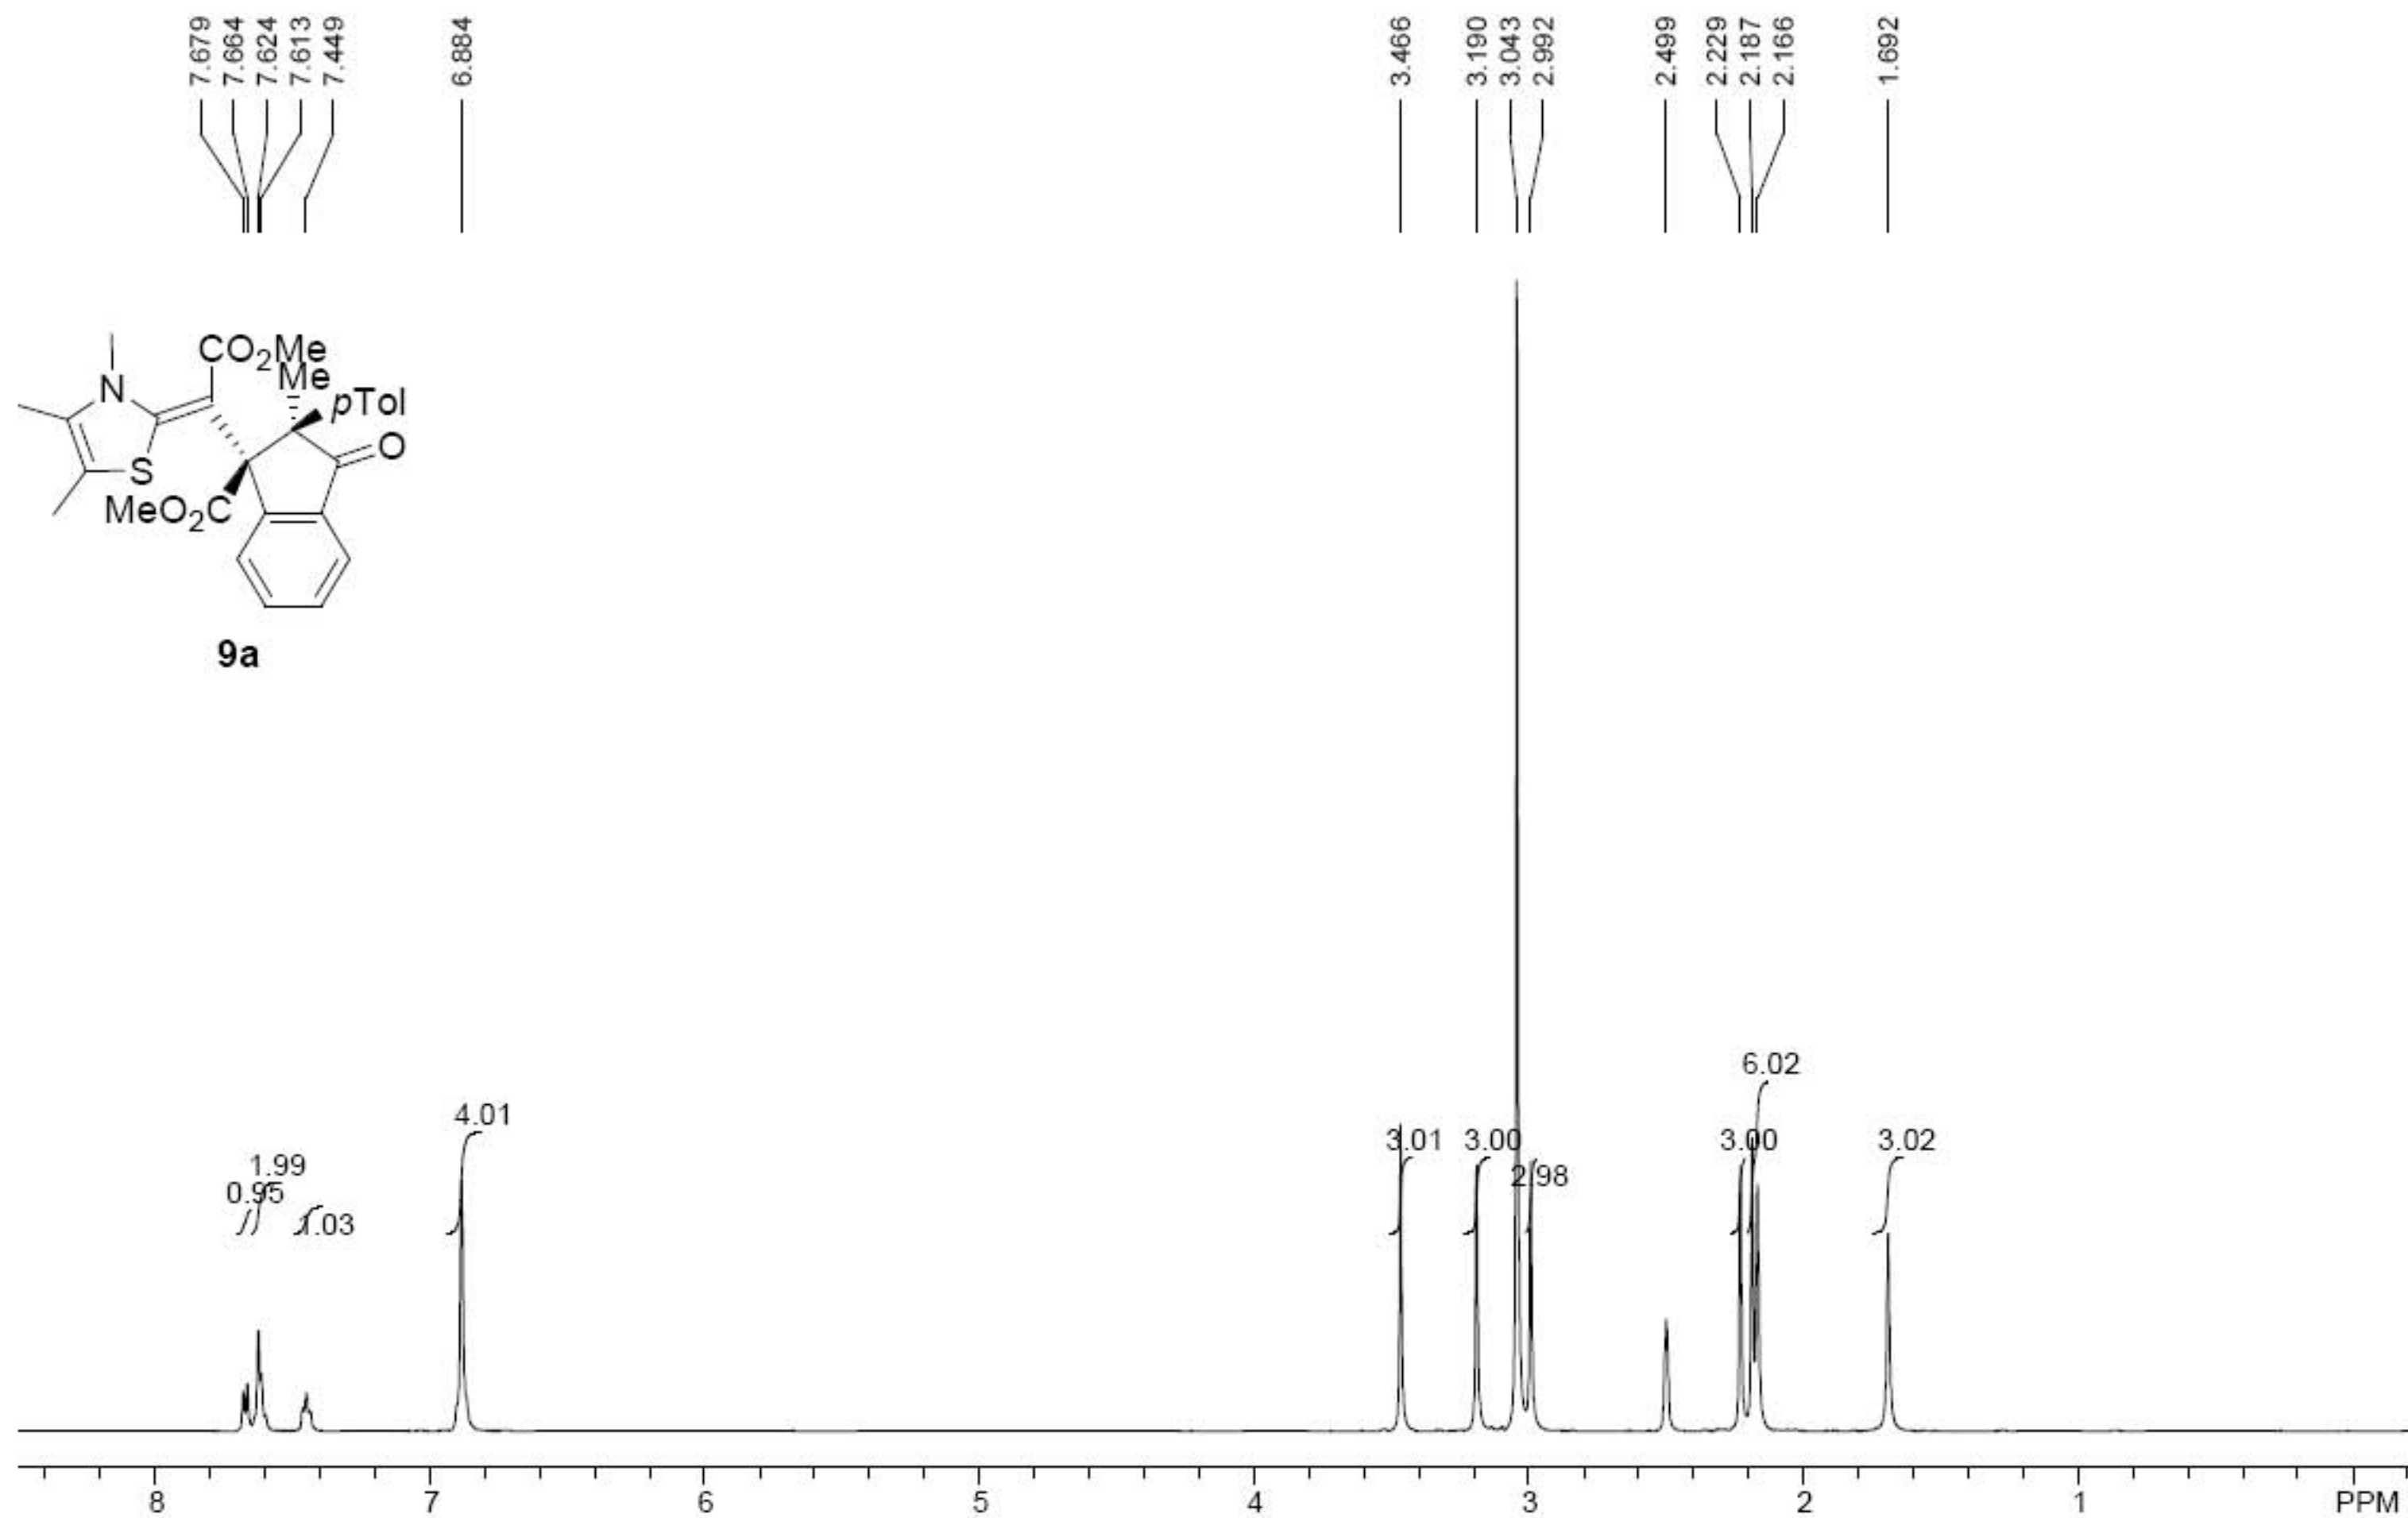

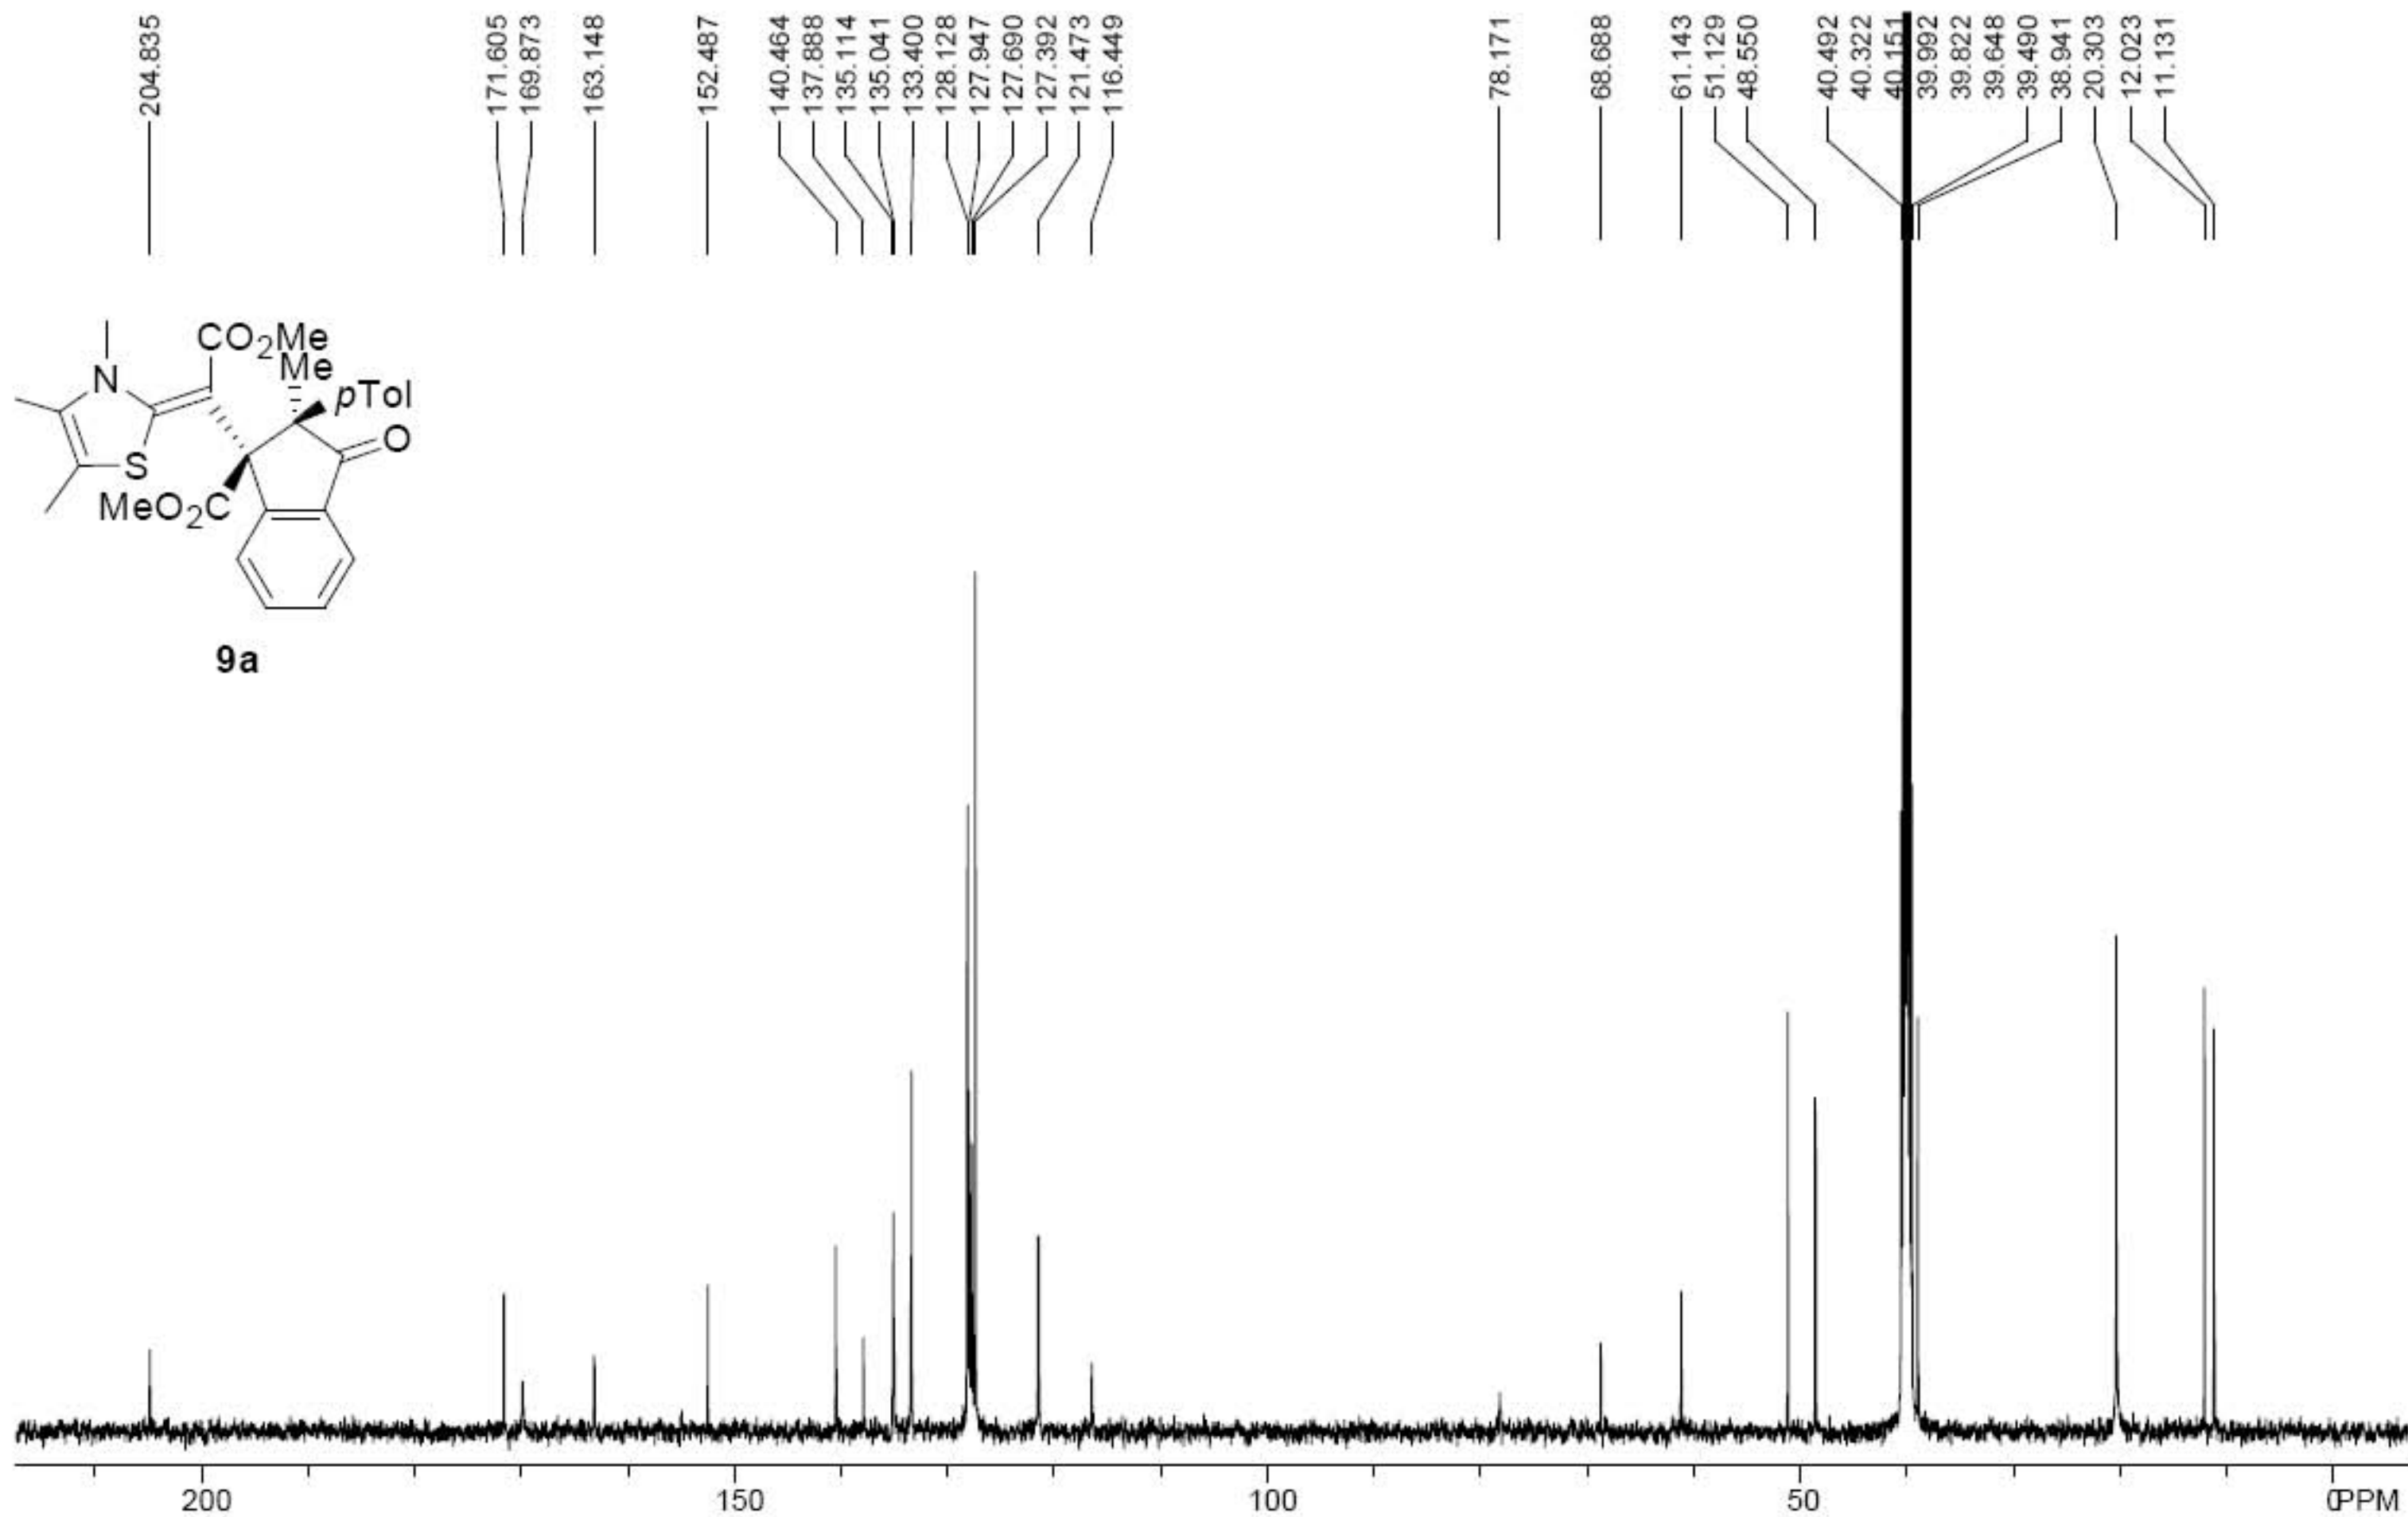

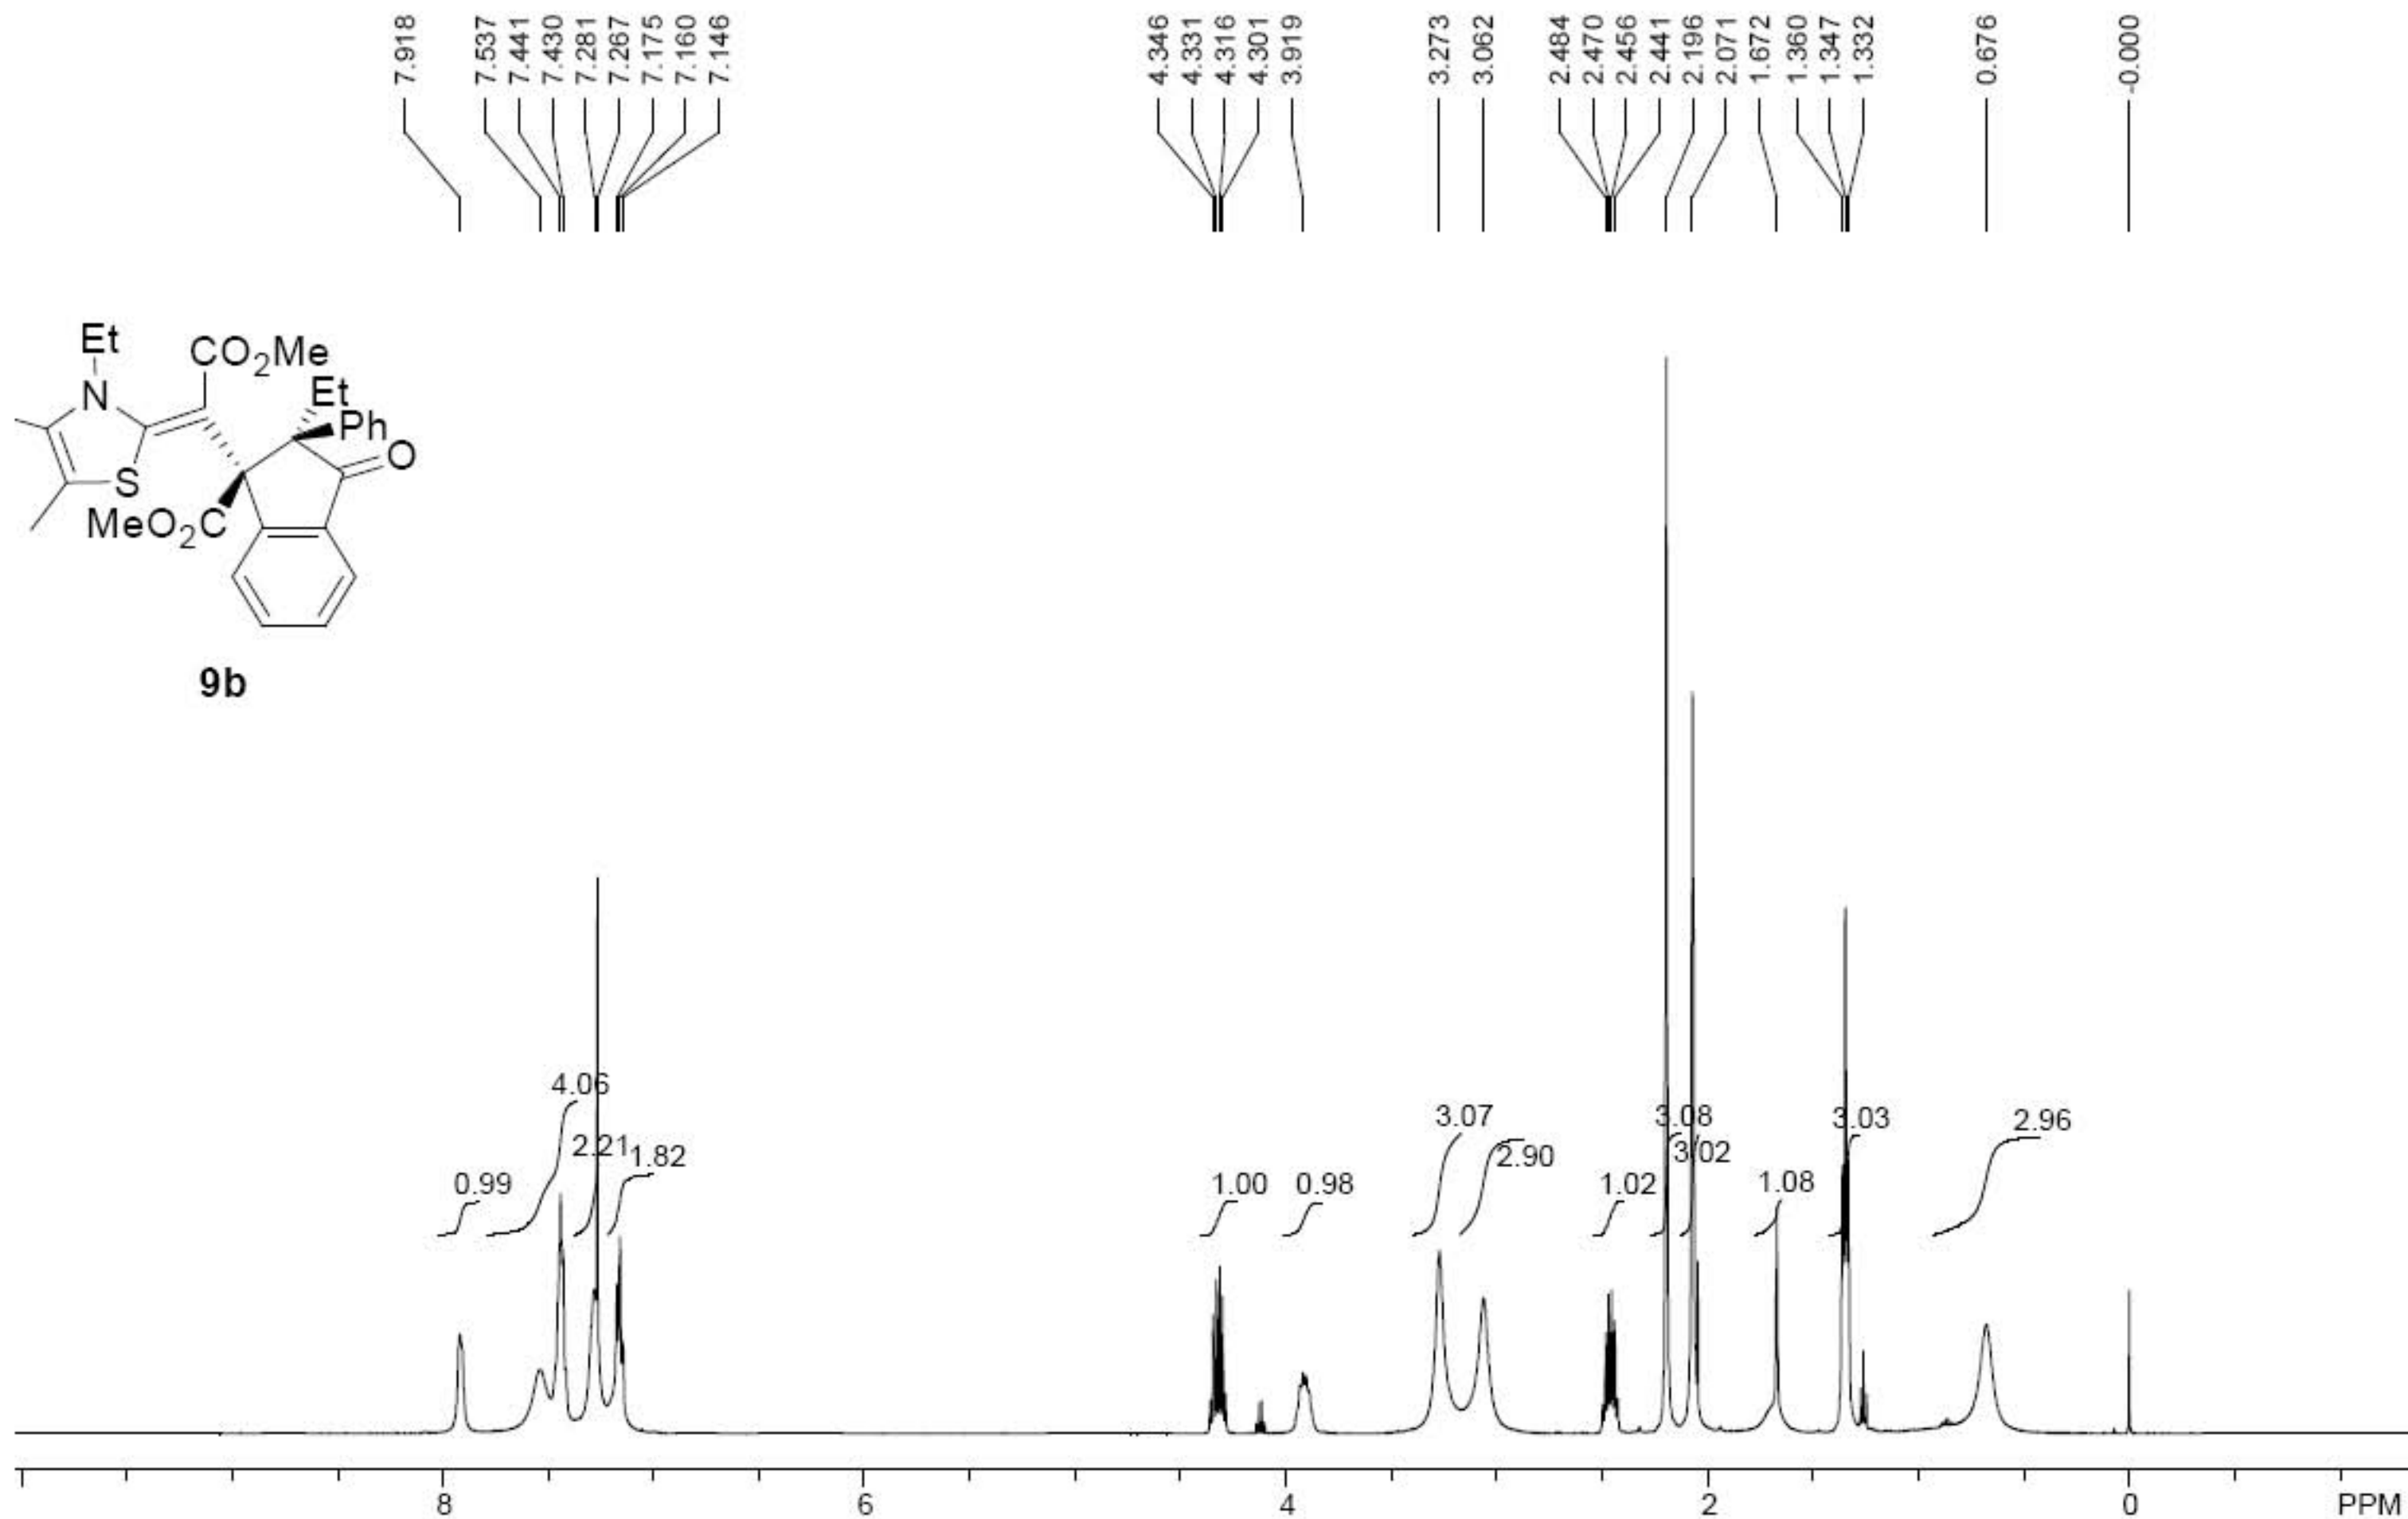



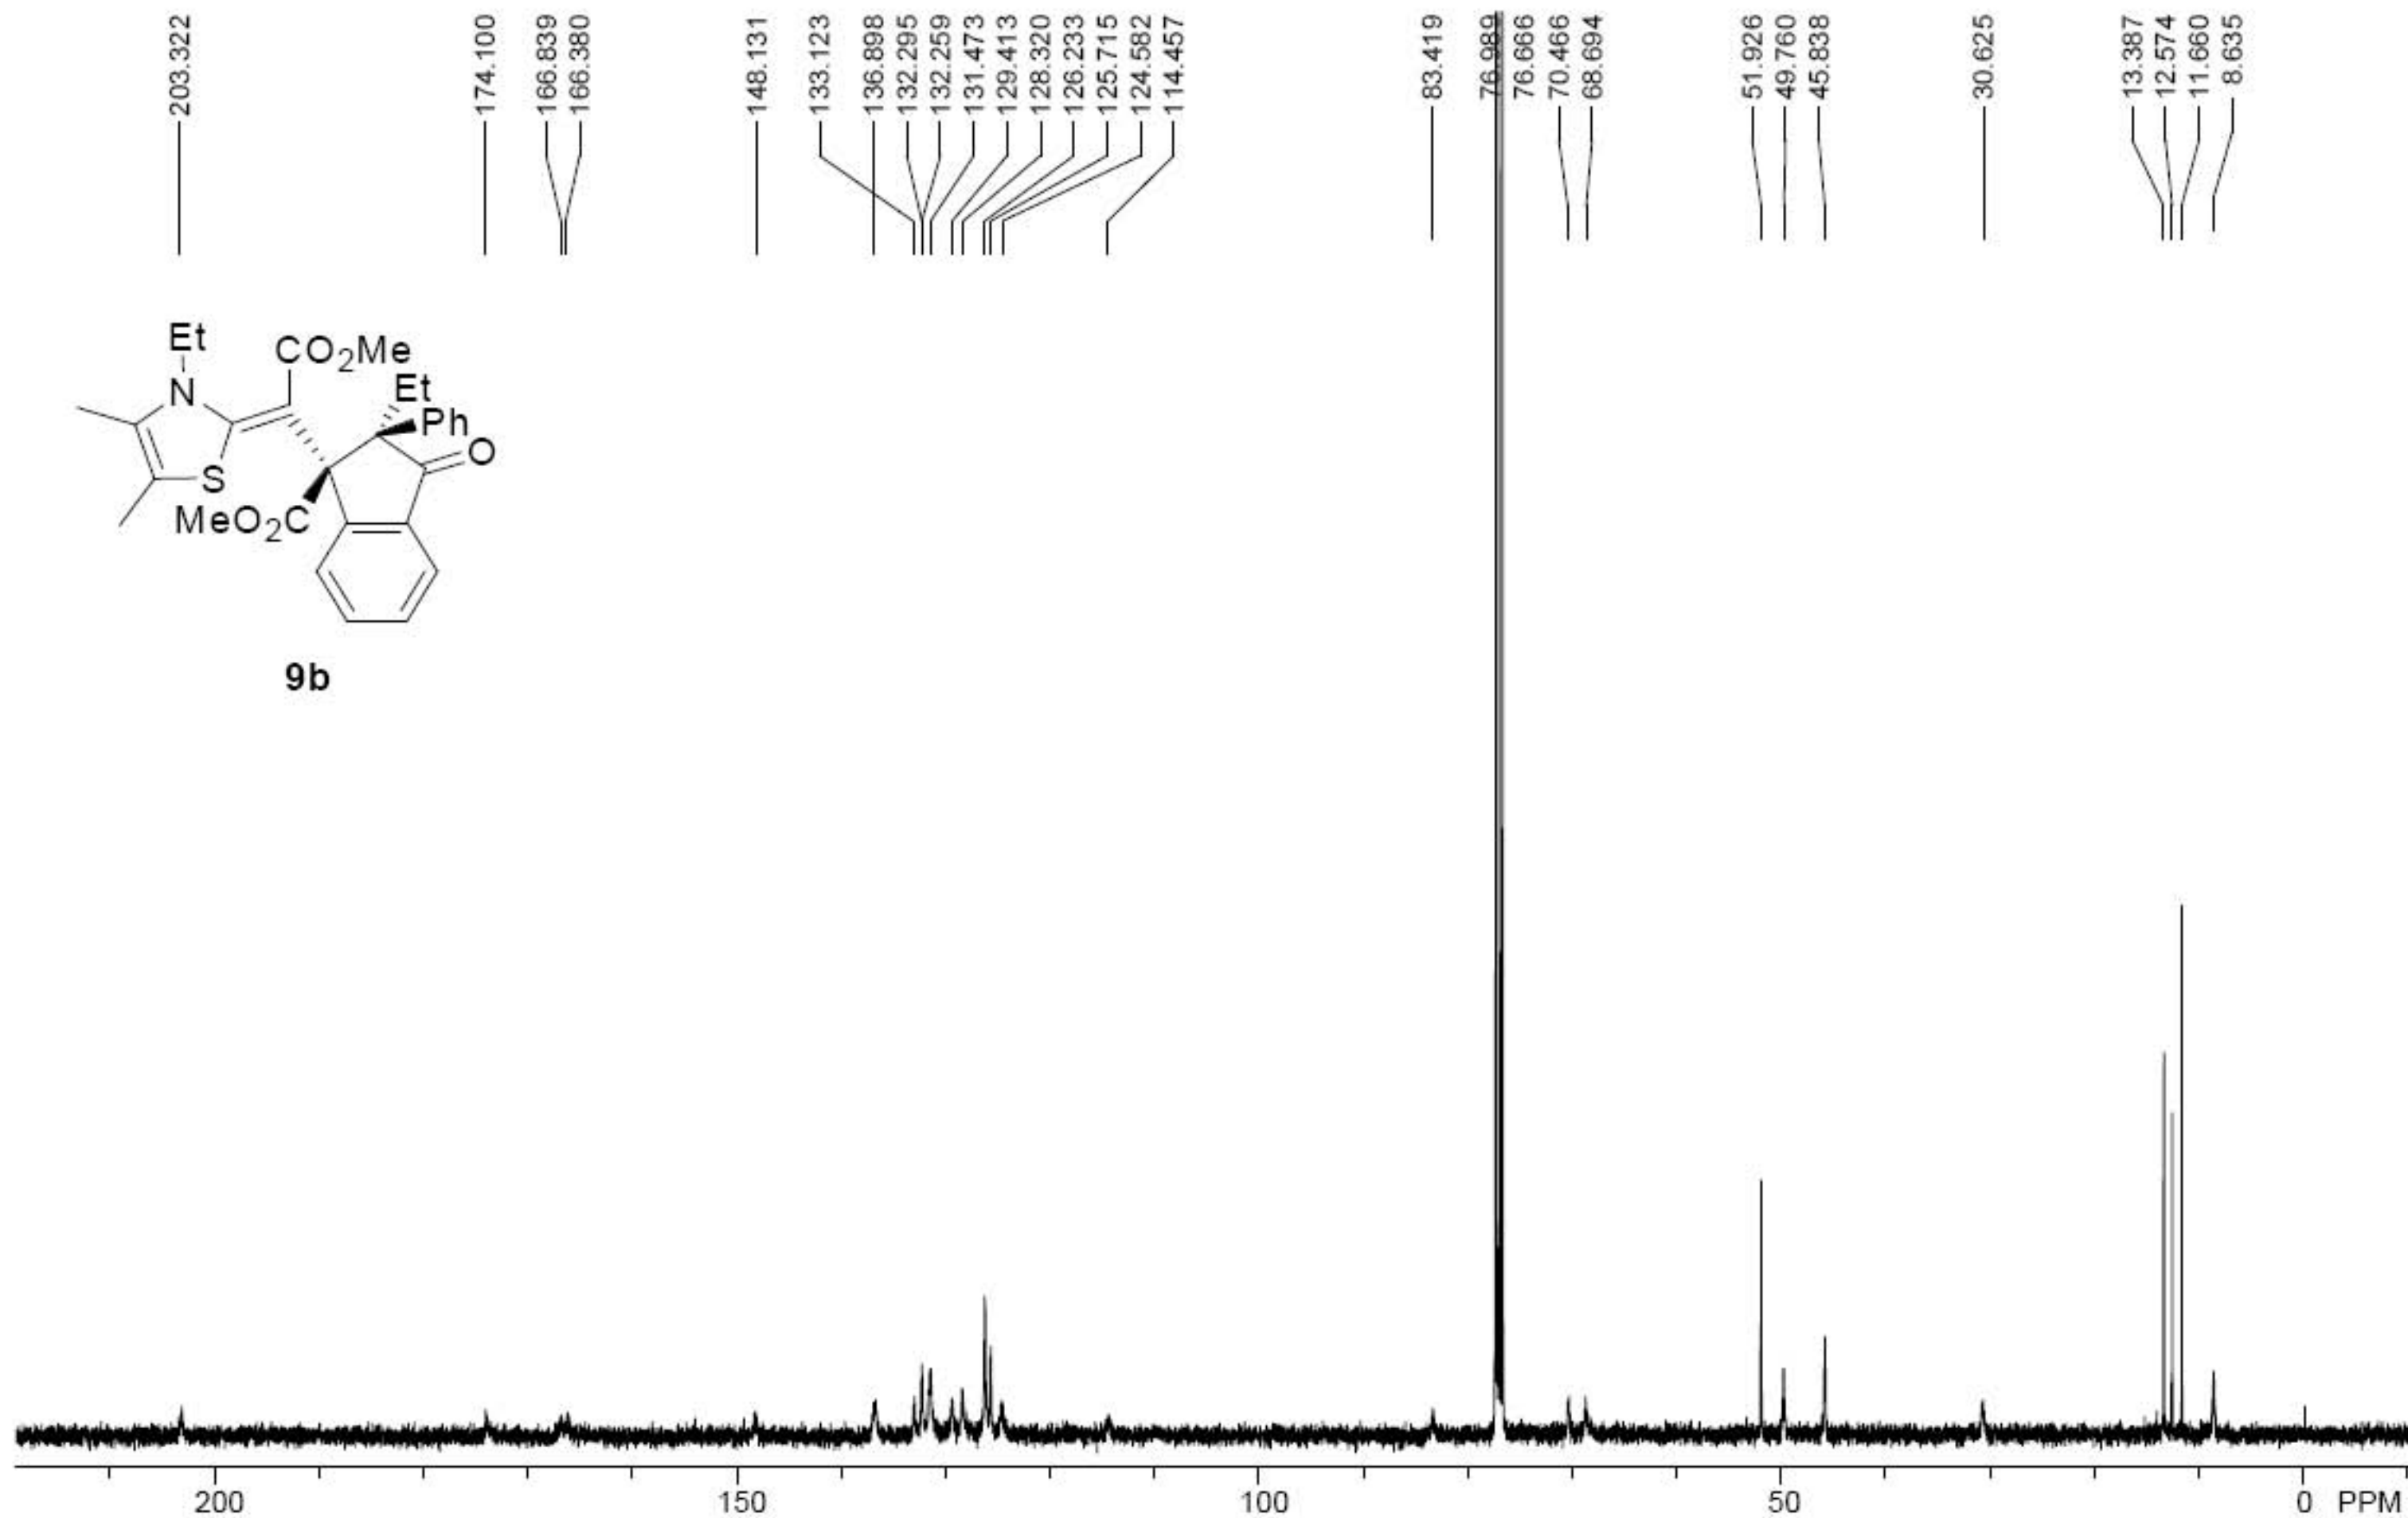

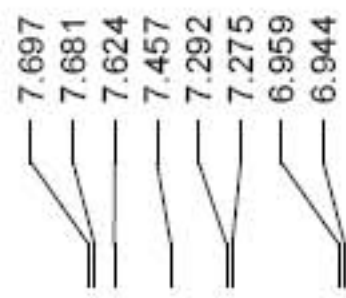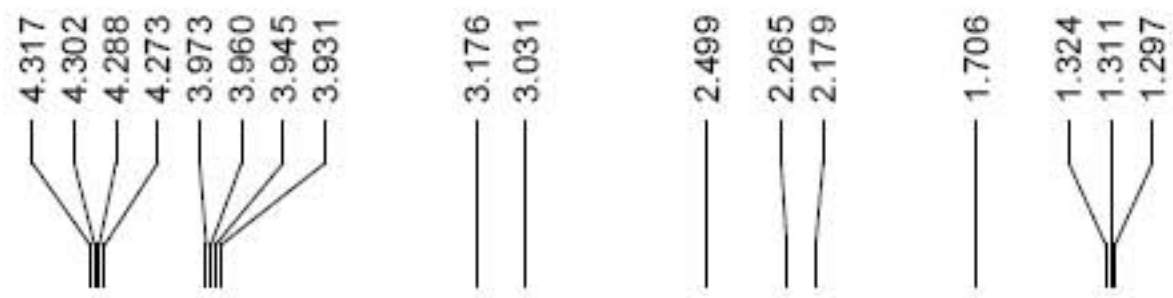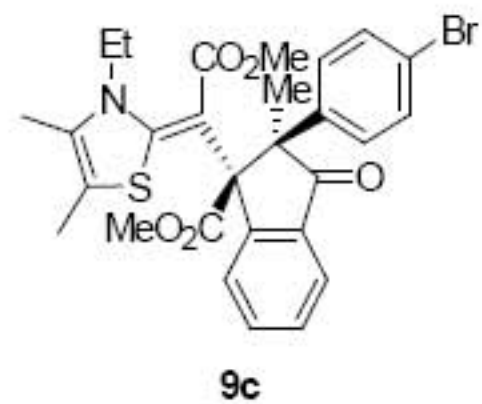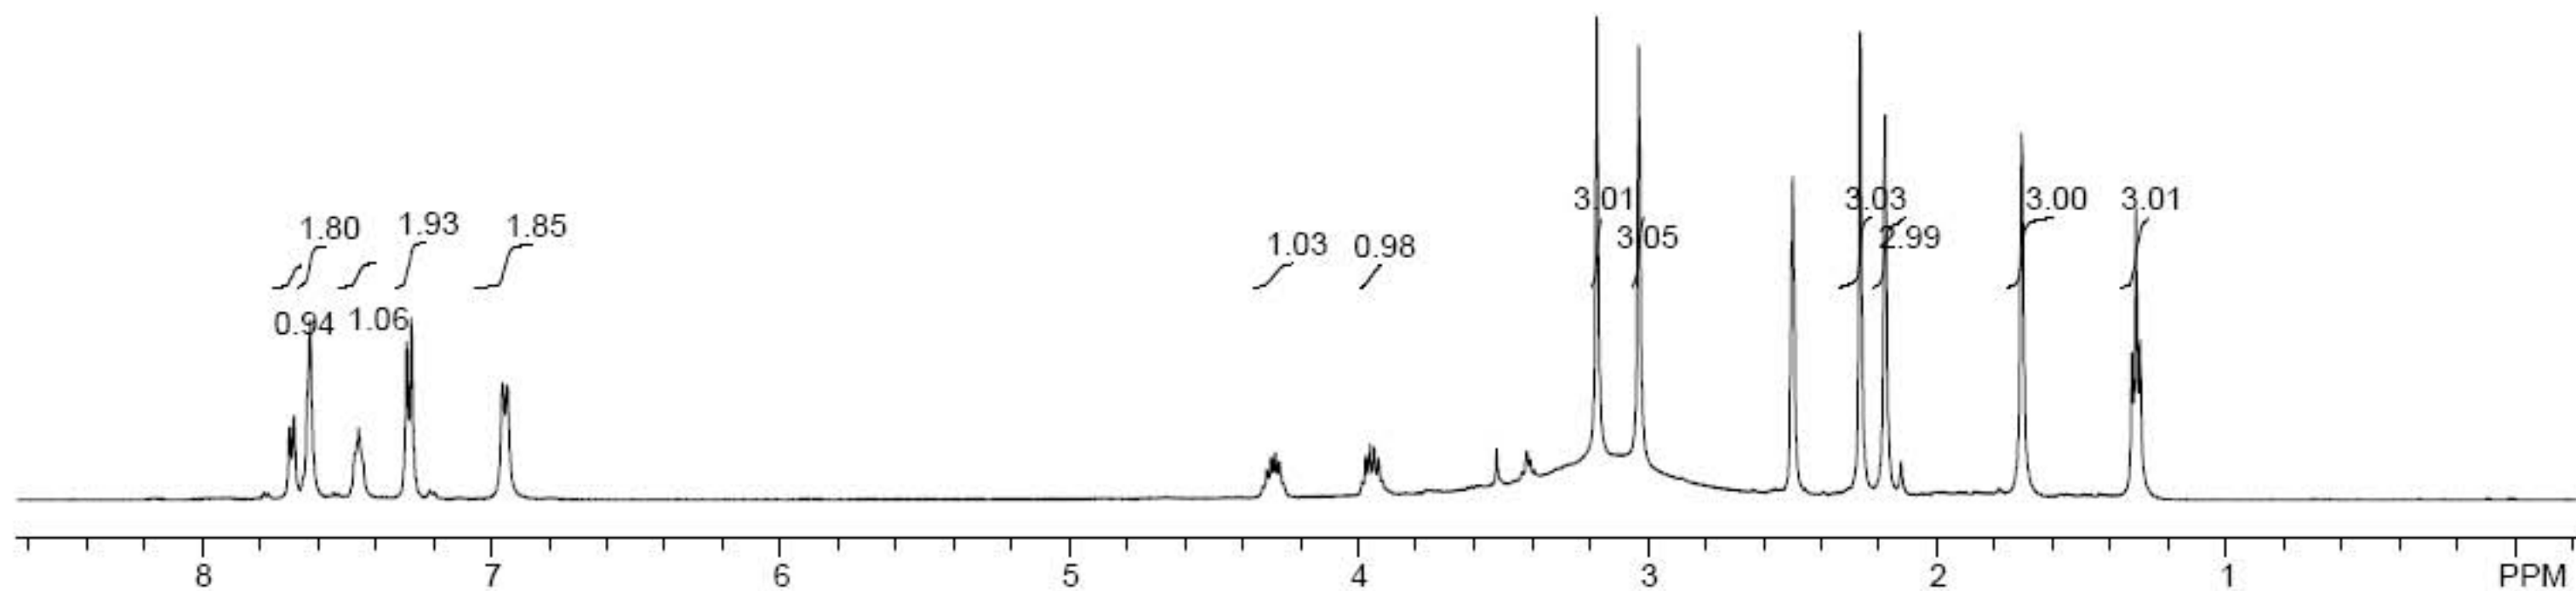

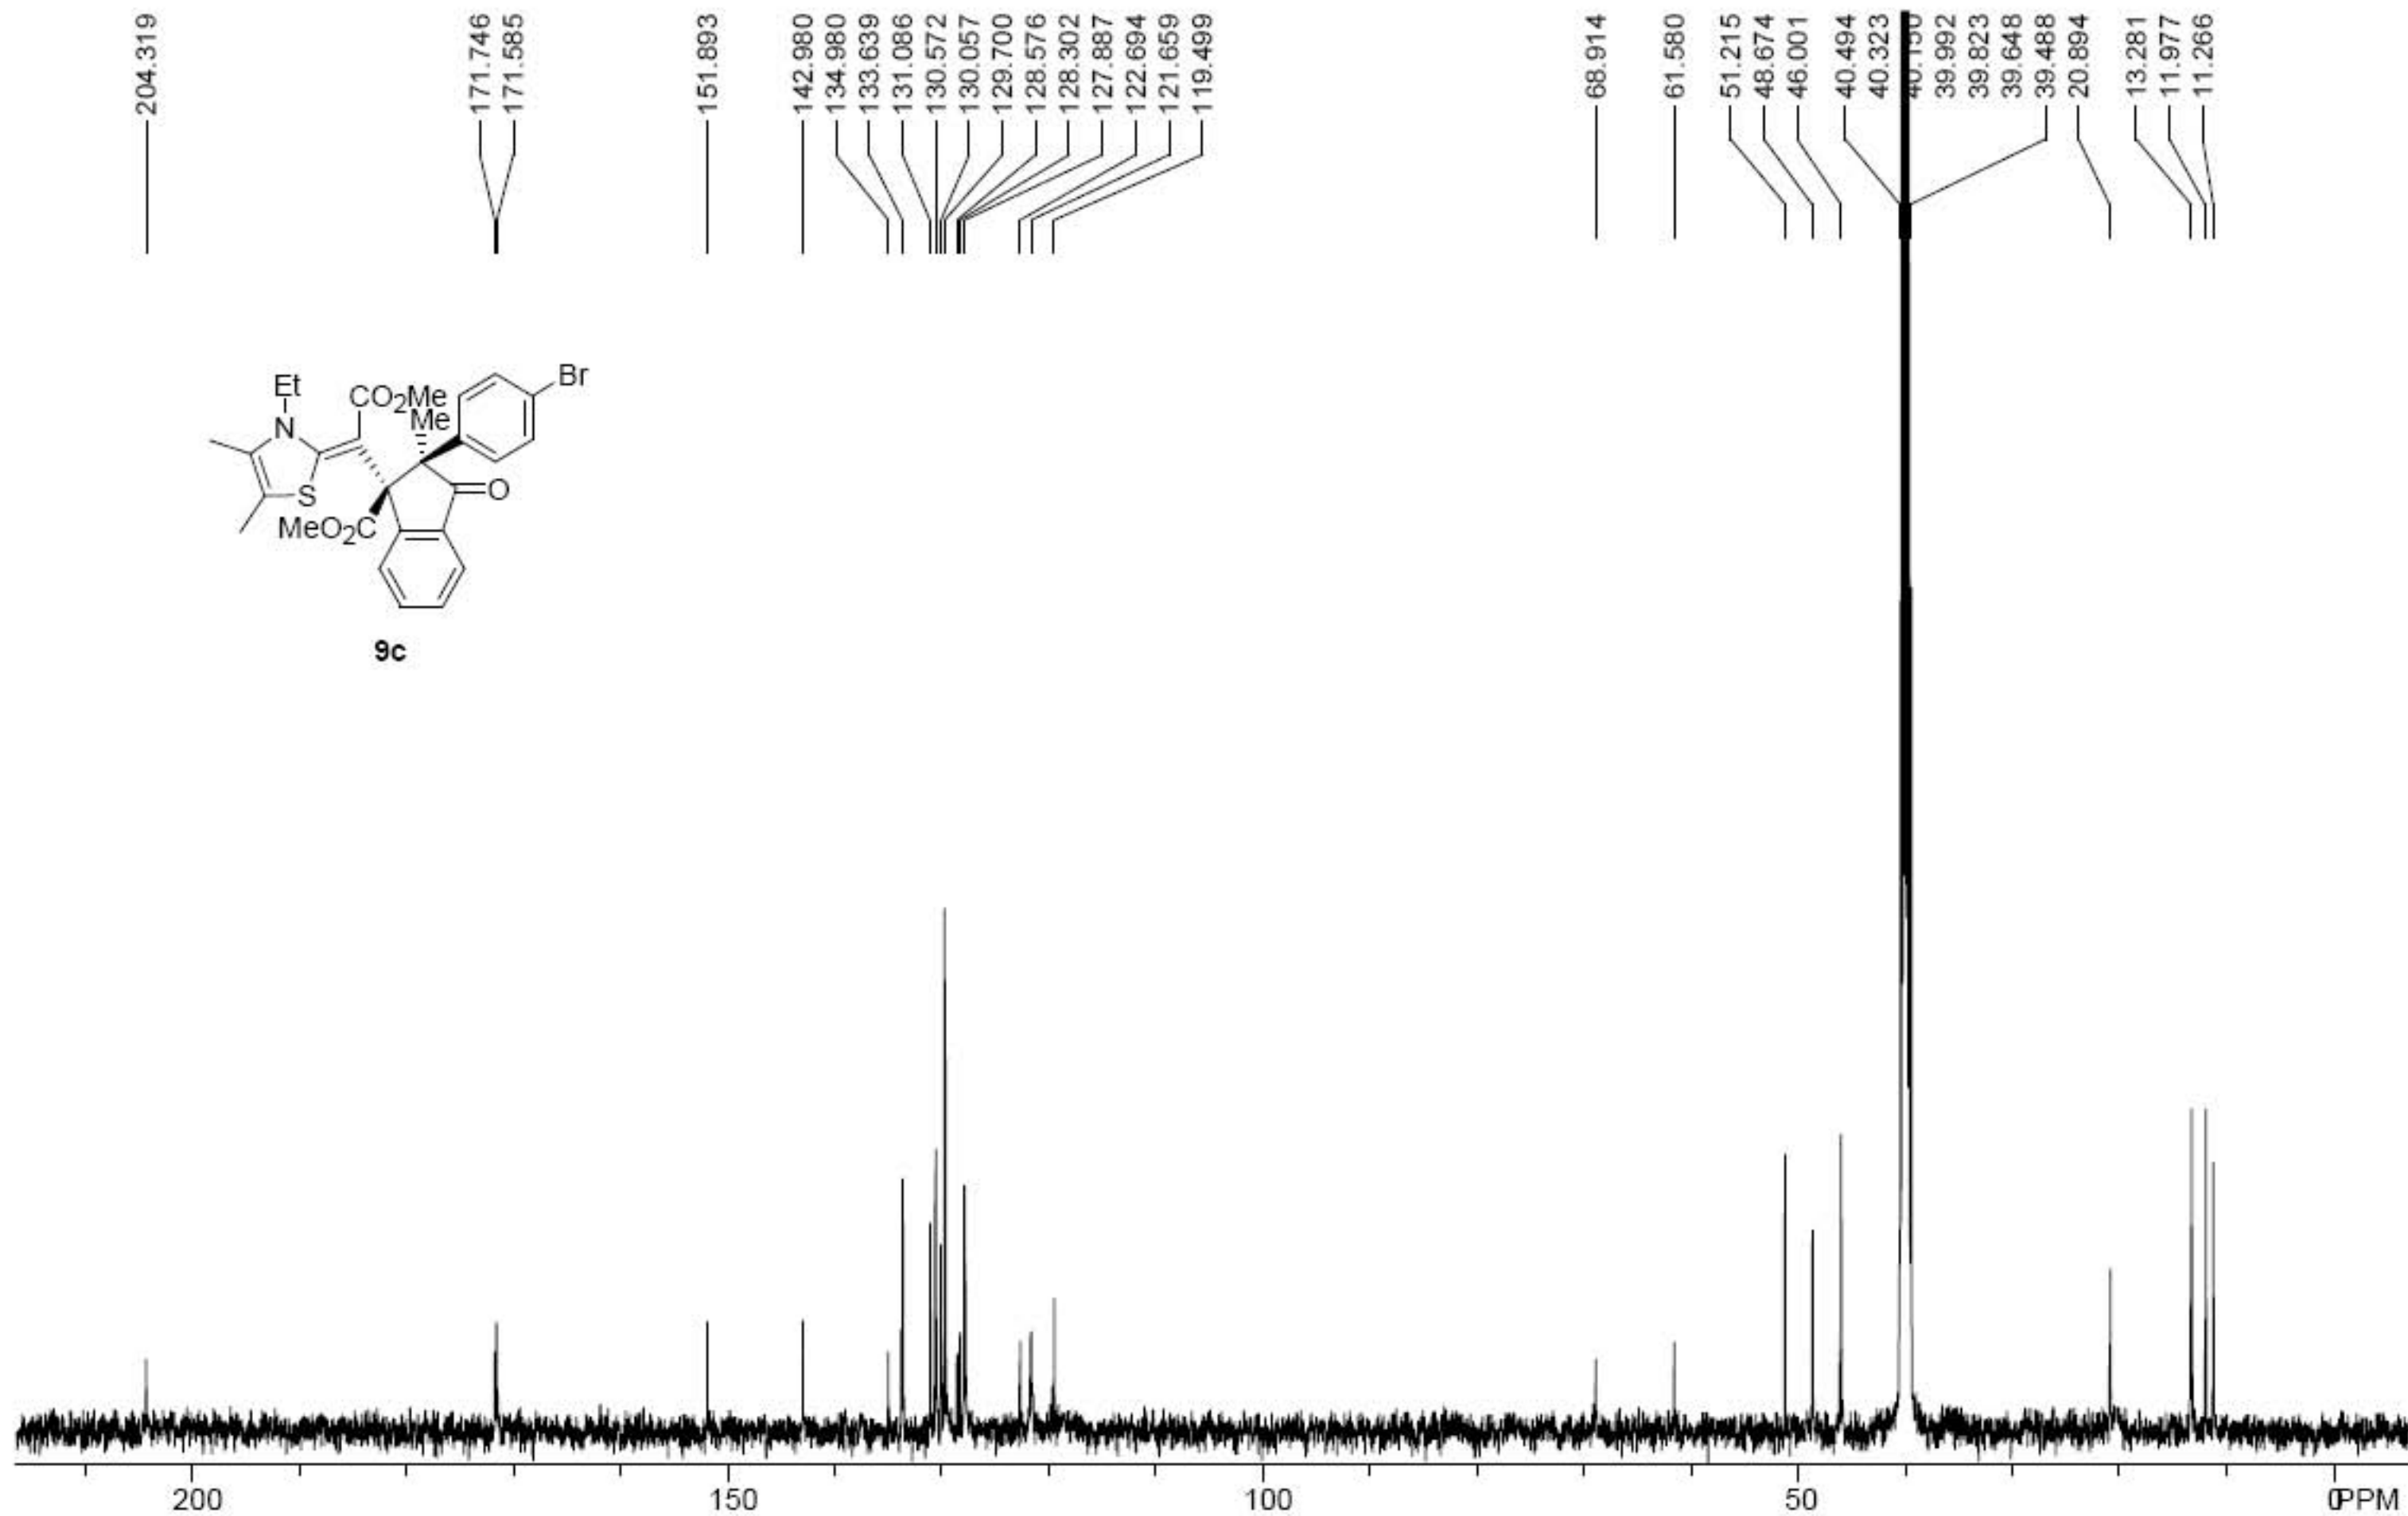

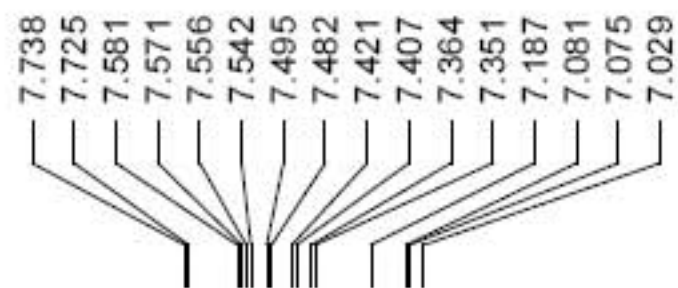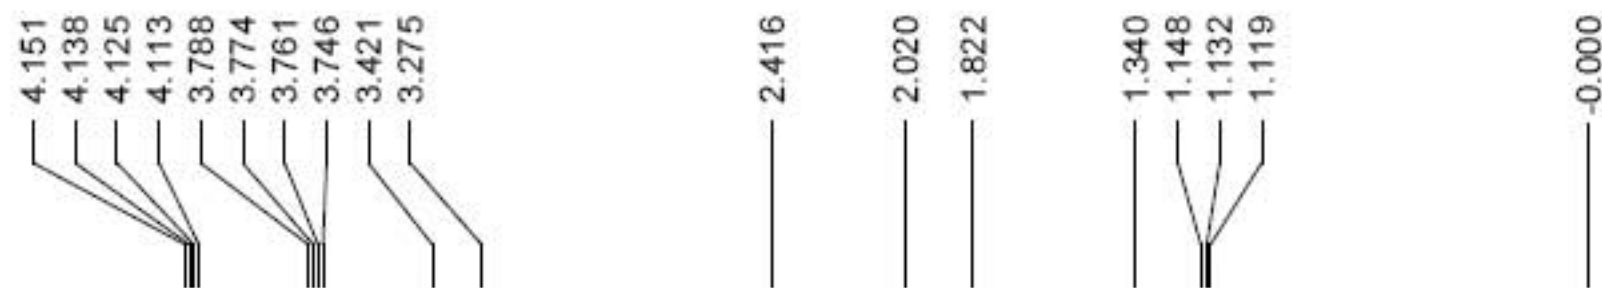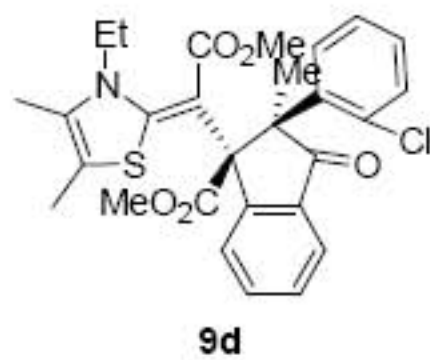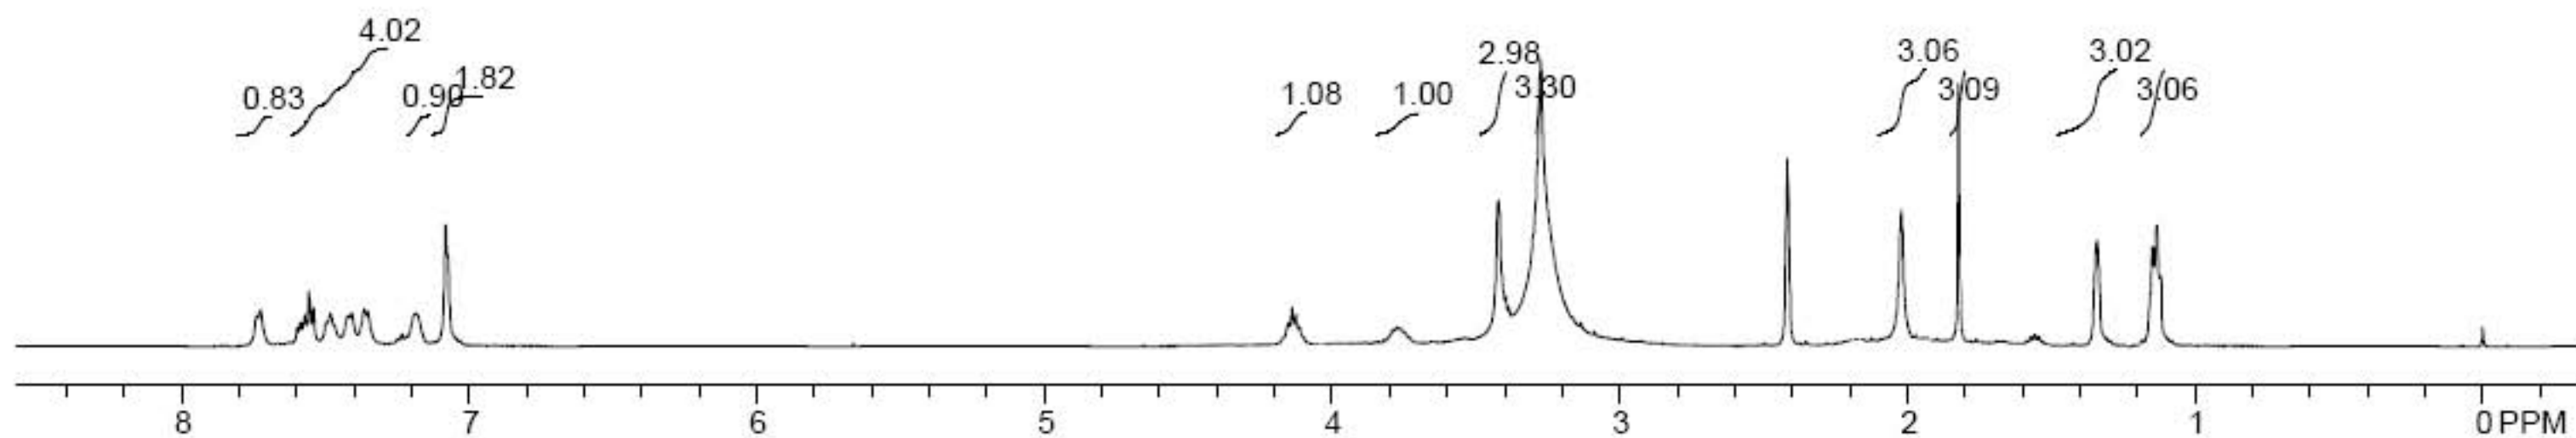

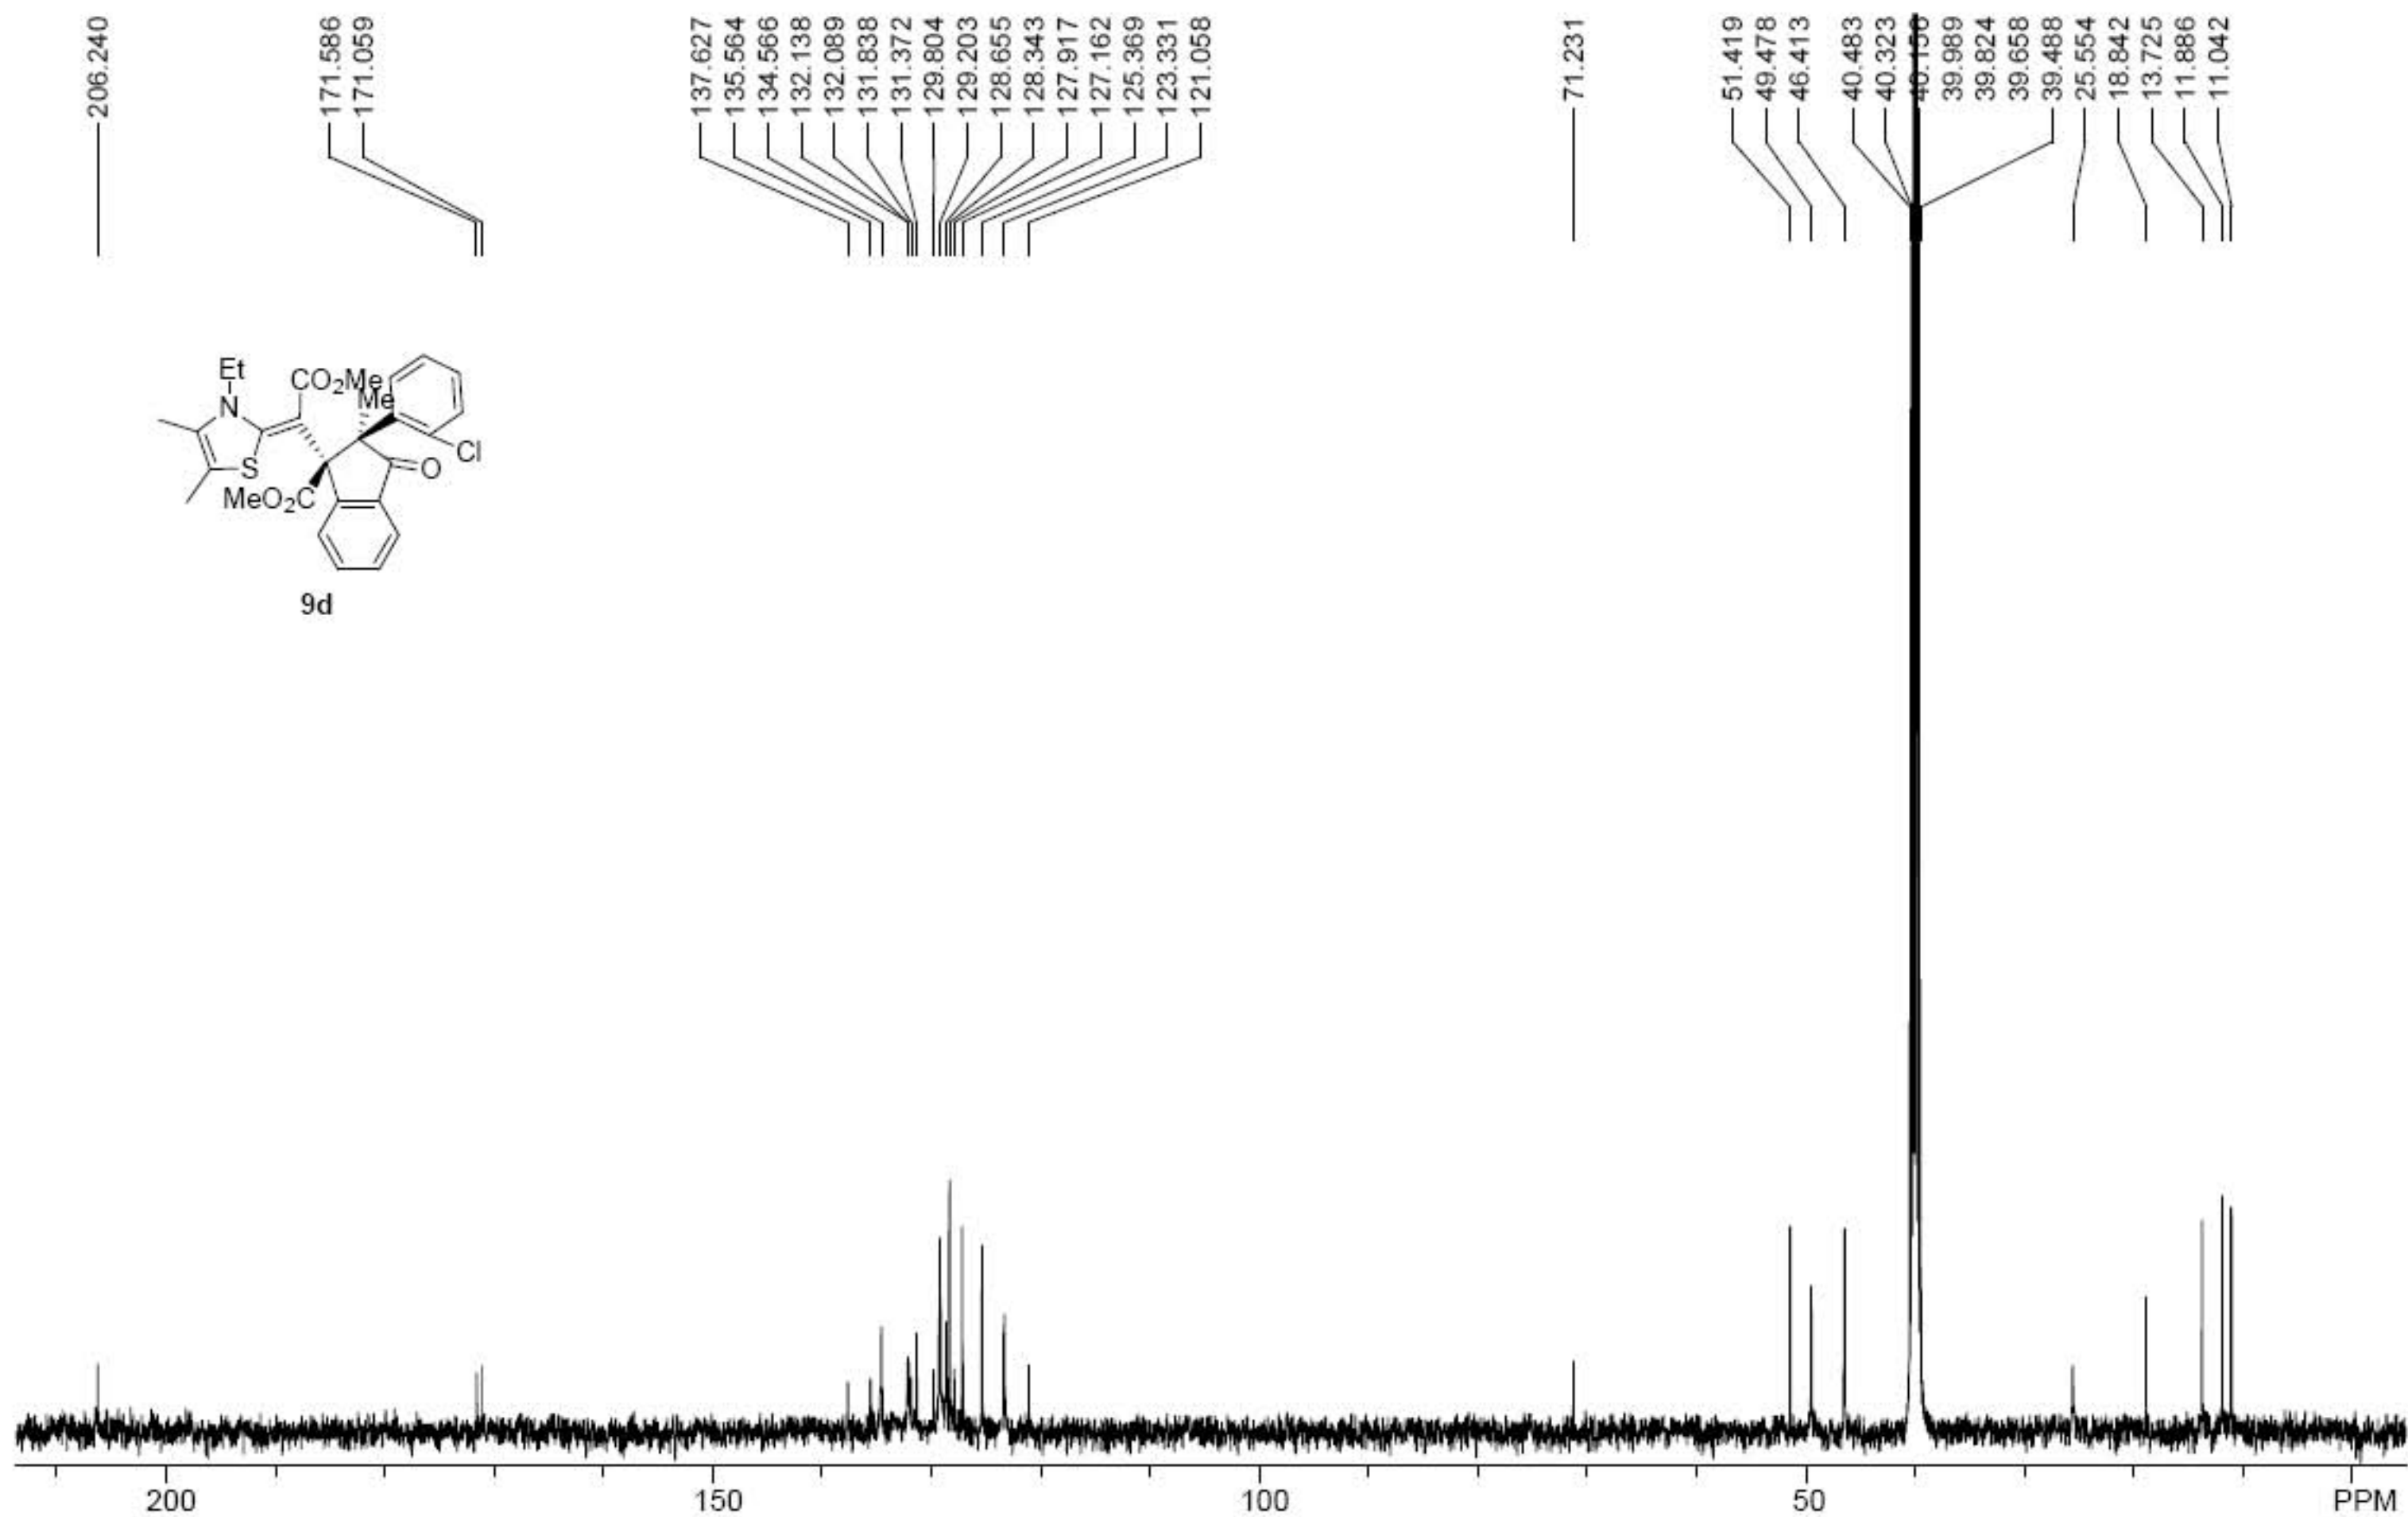

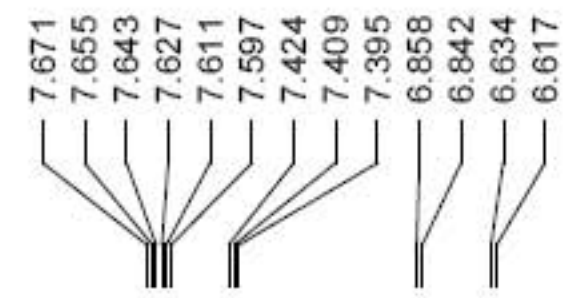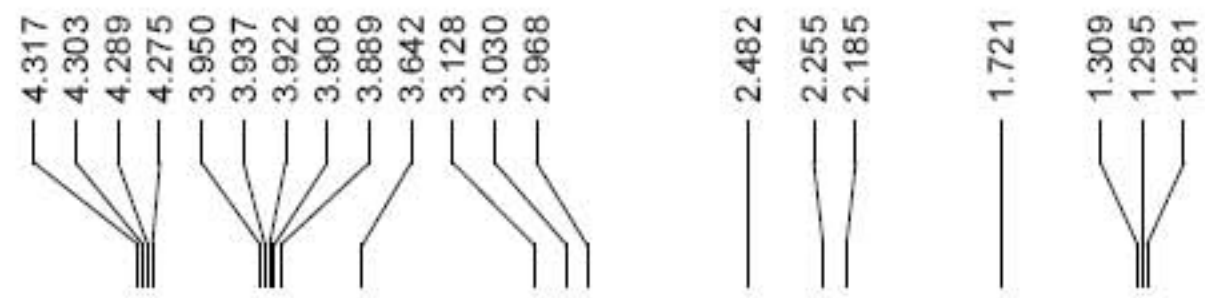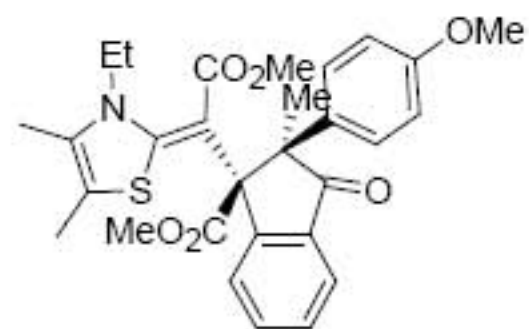

9e

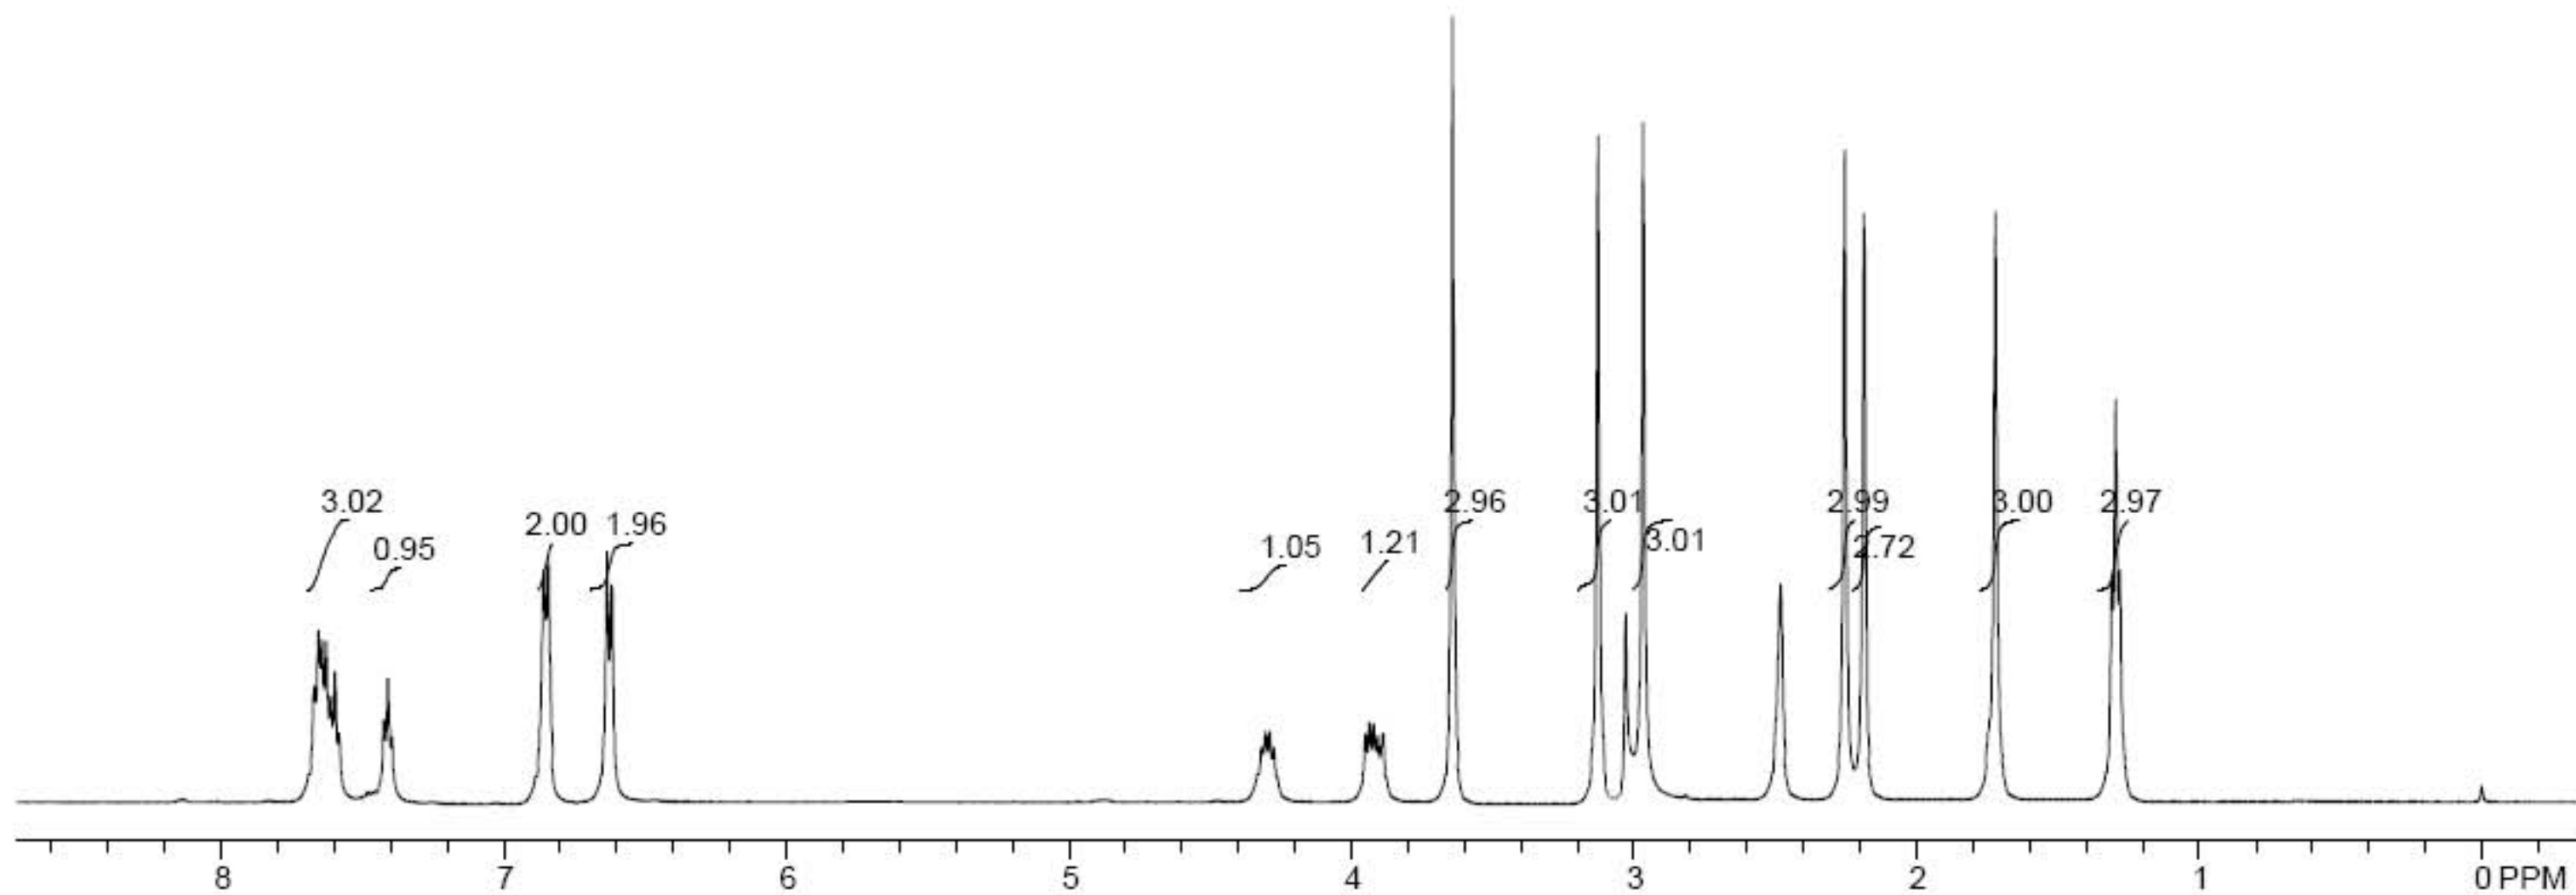

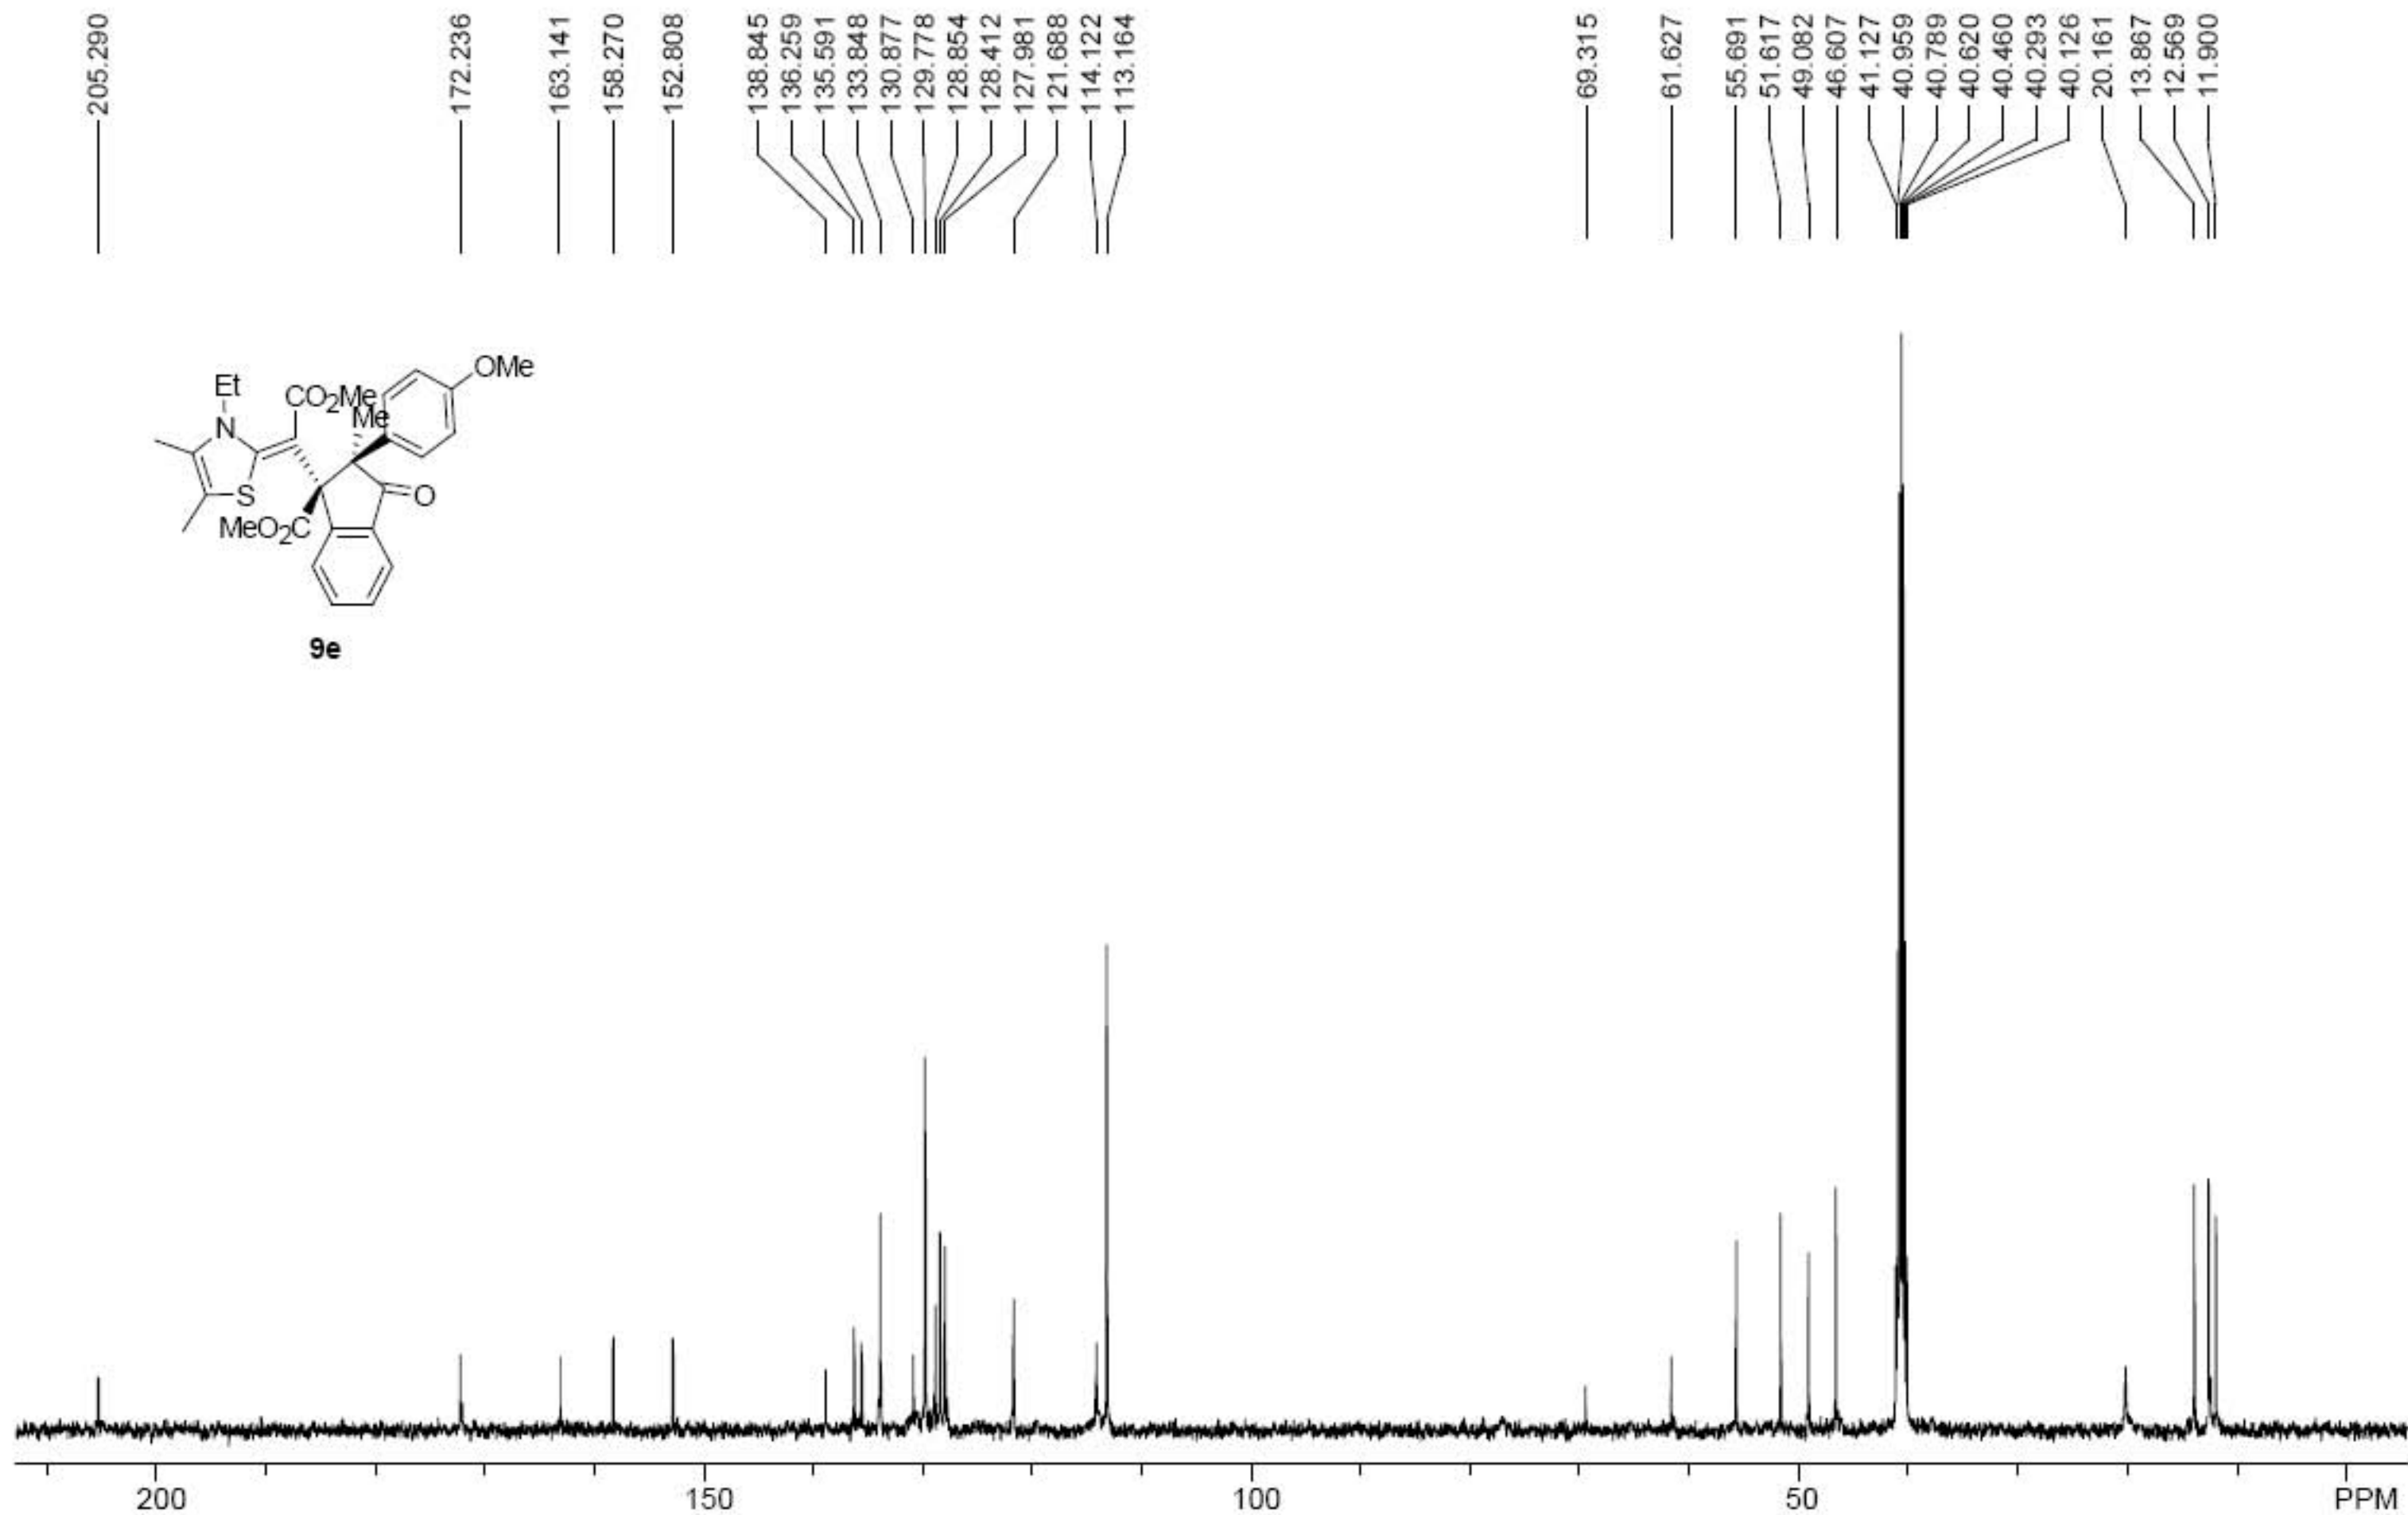

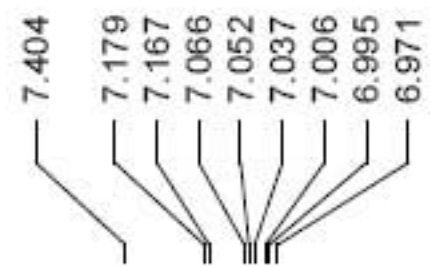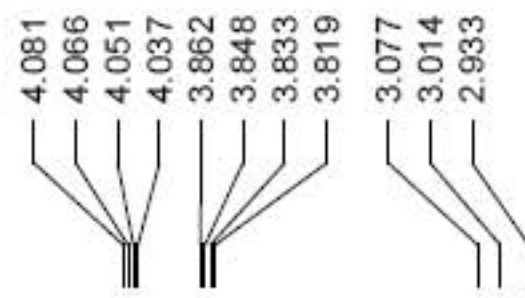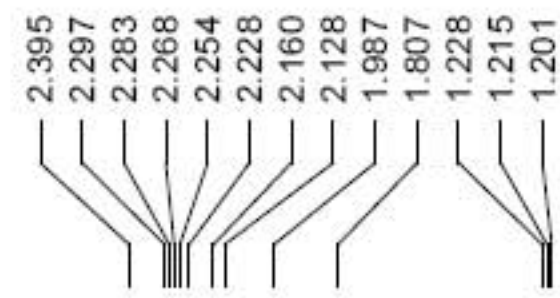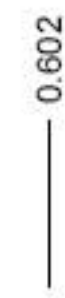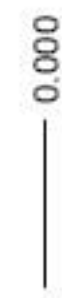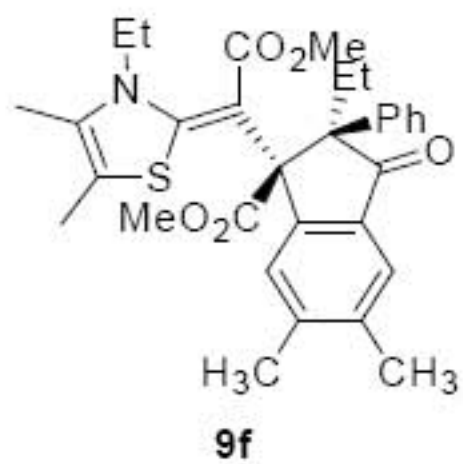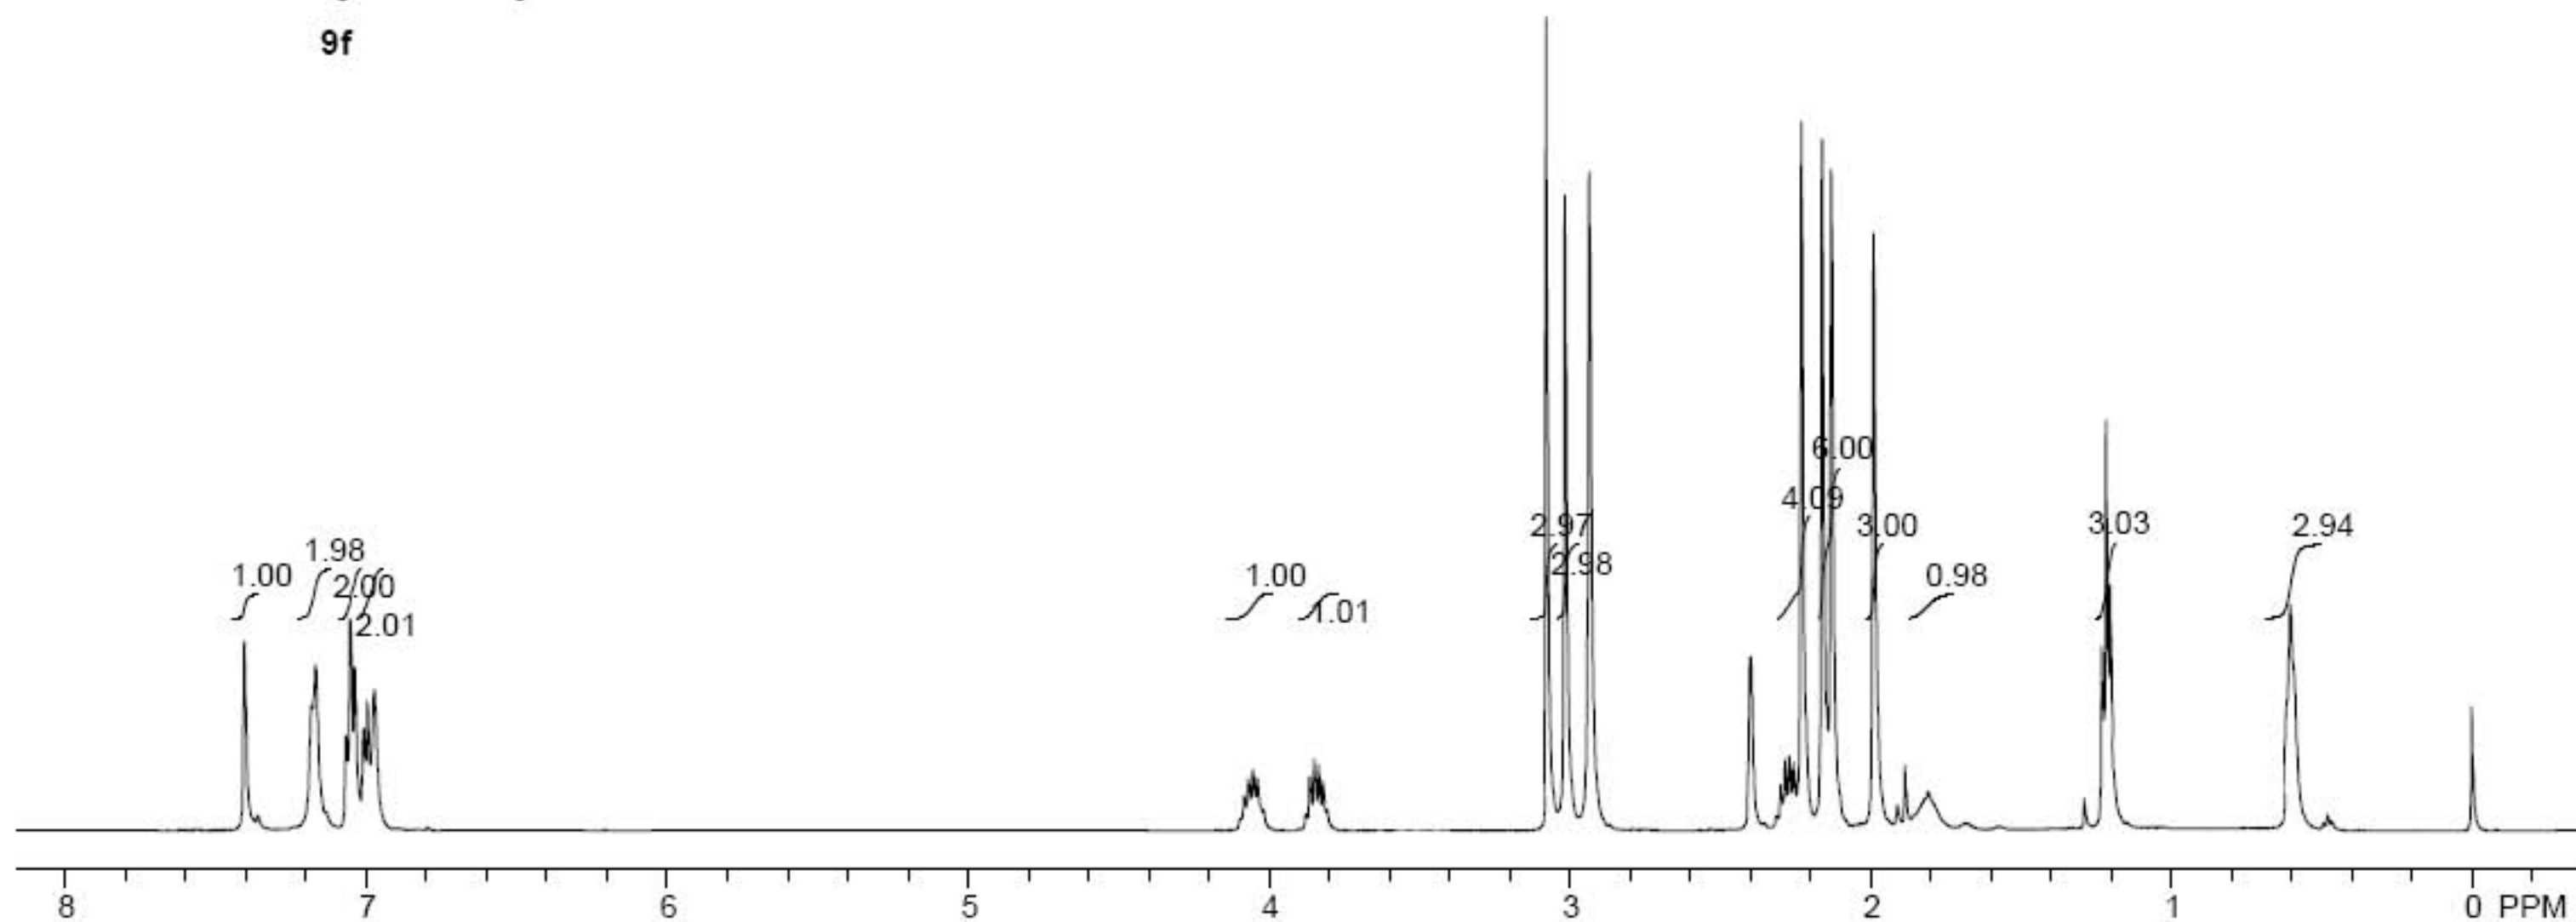



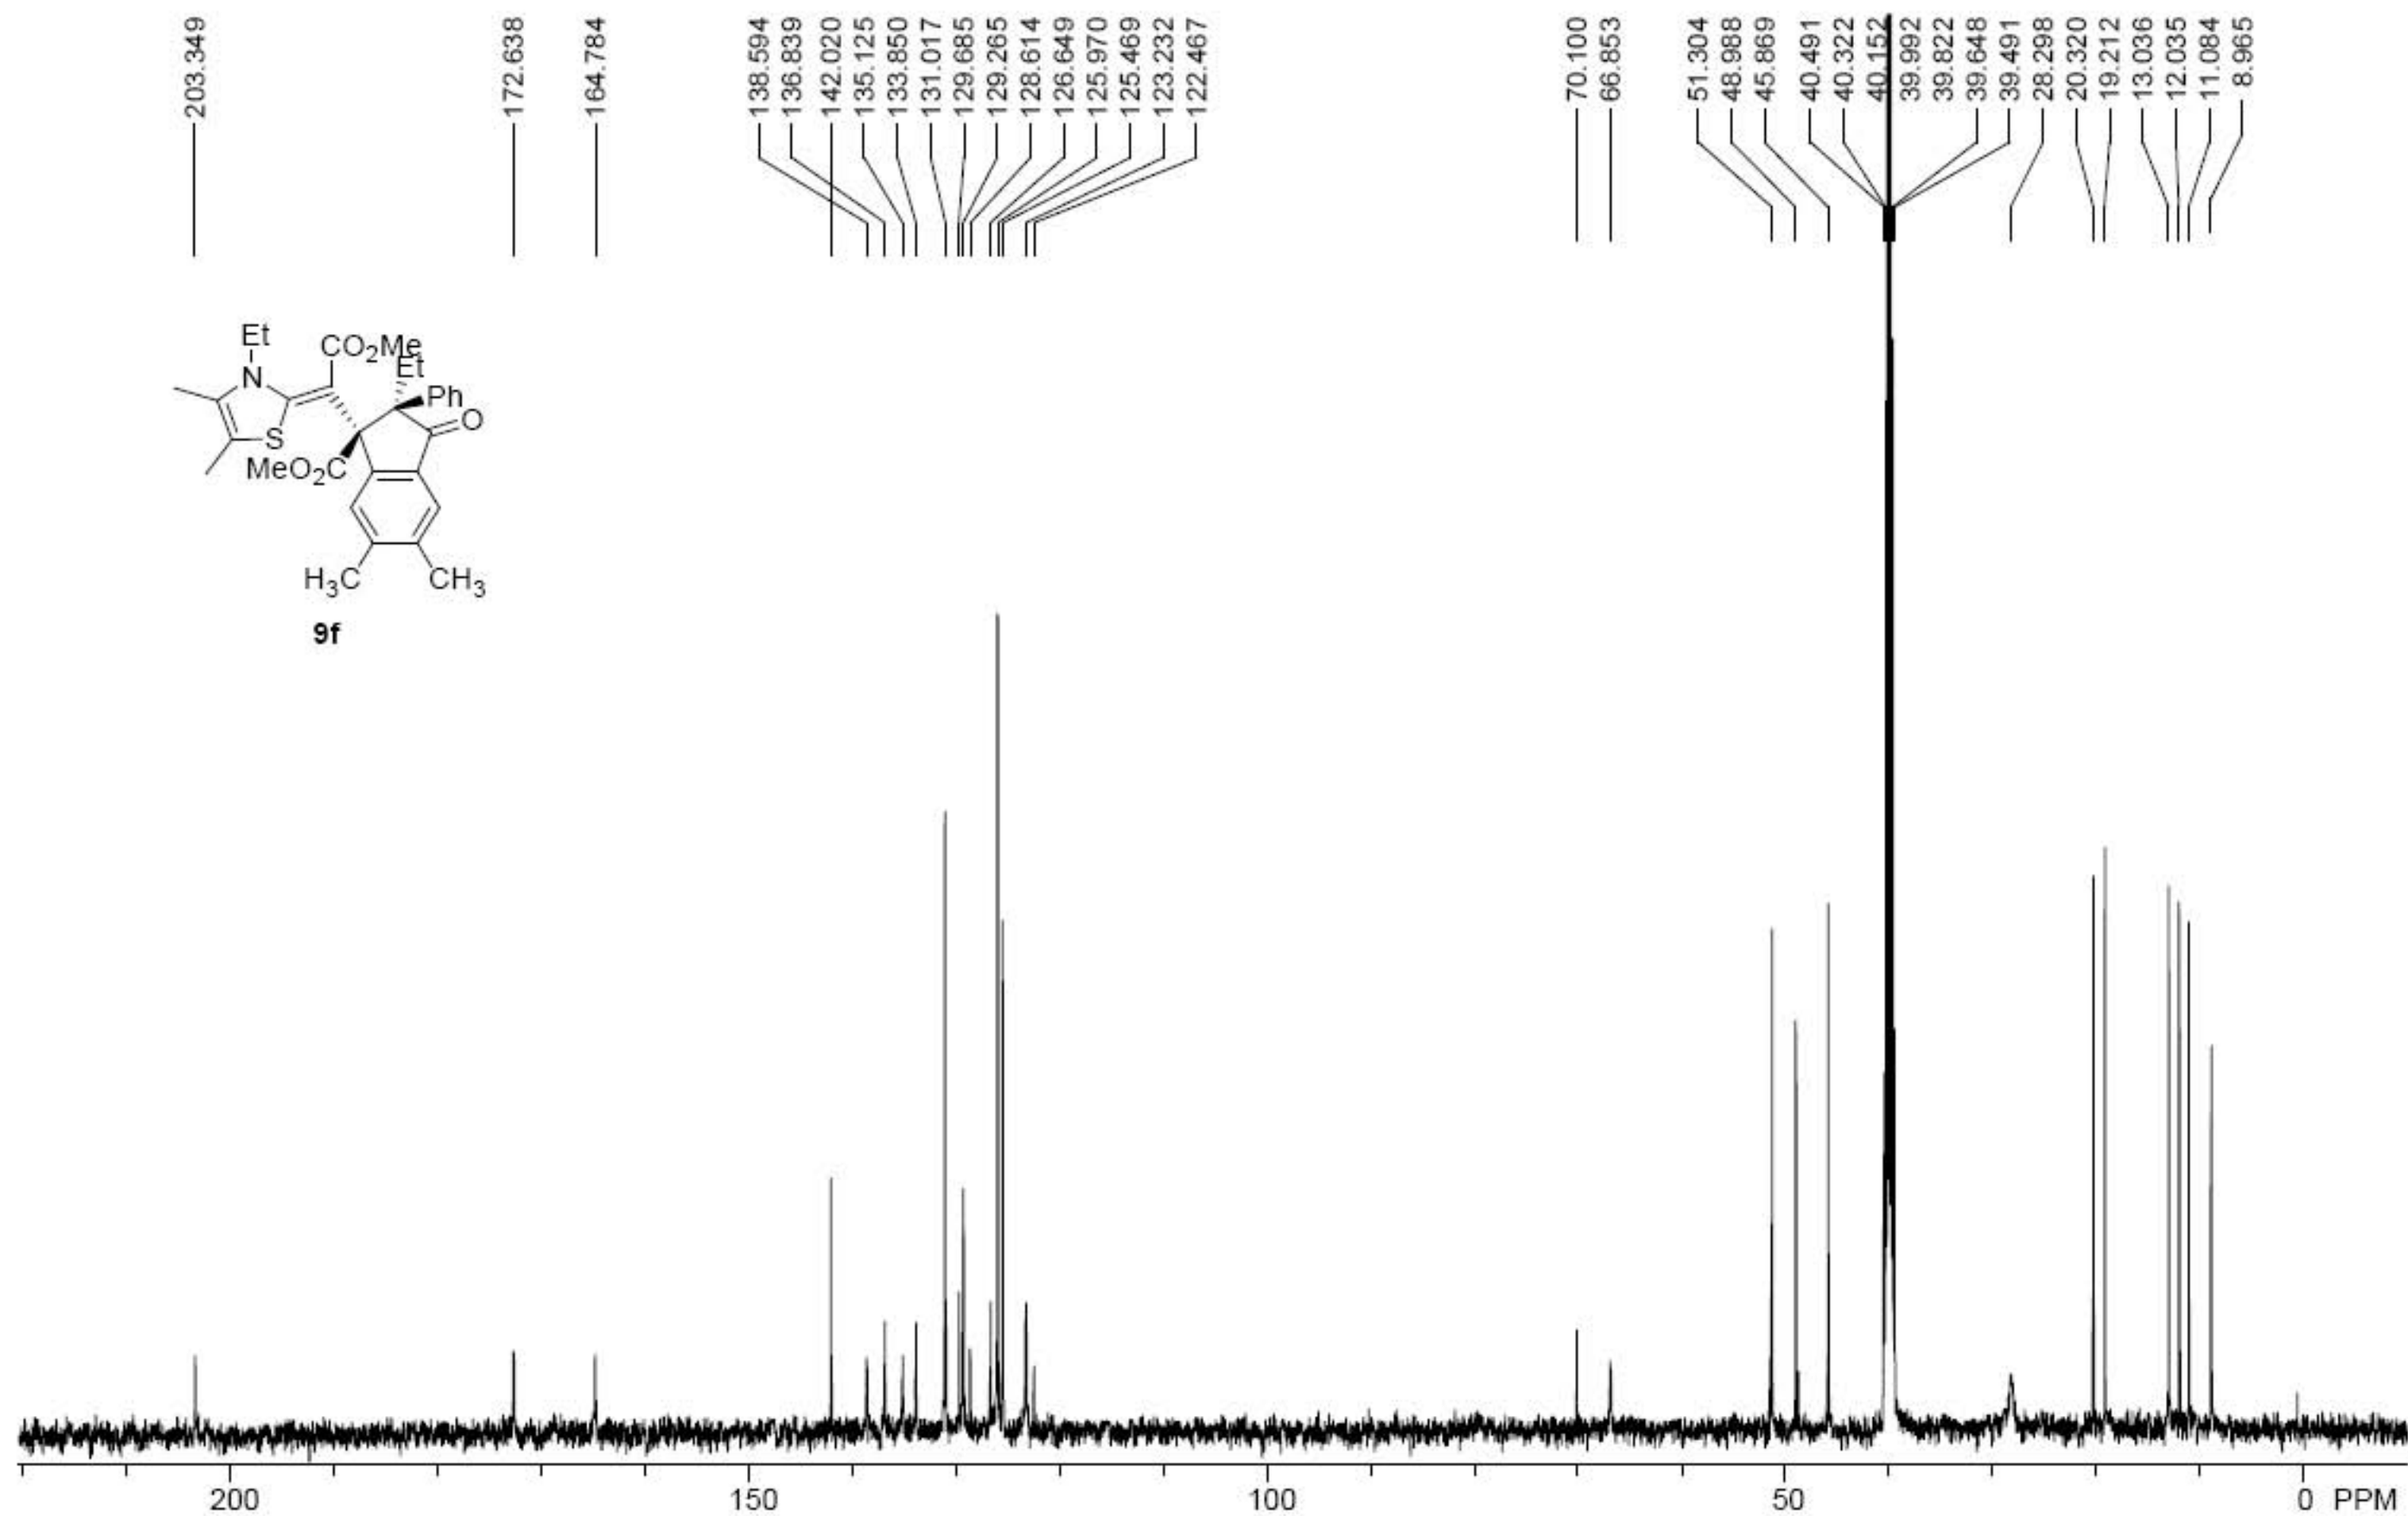

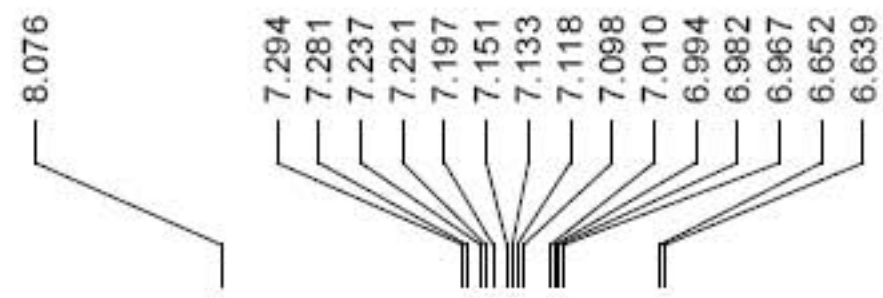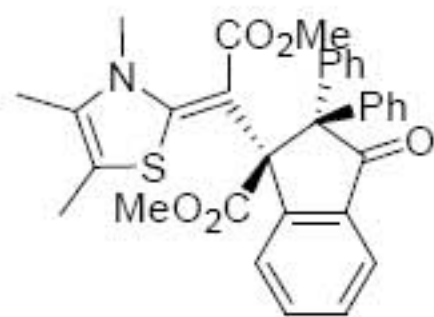

9g

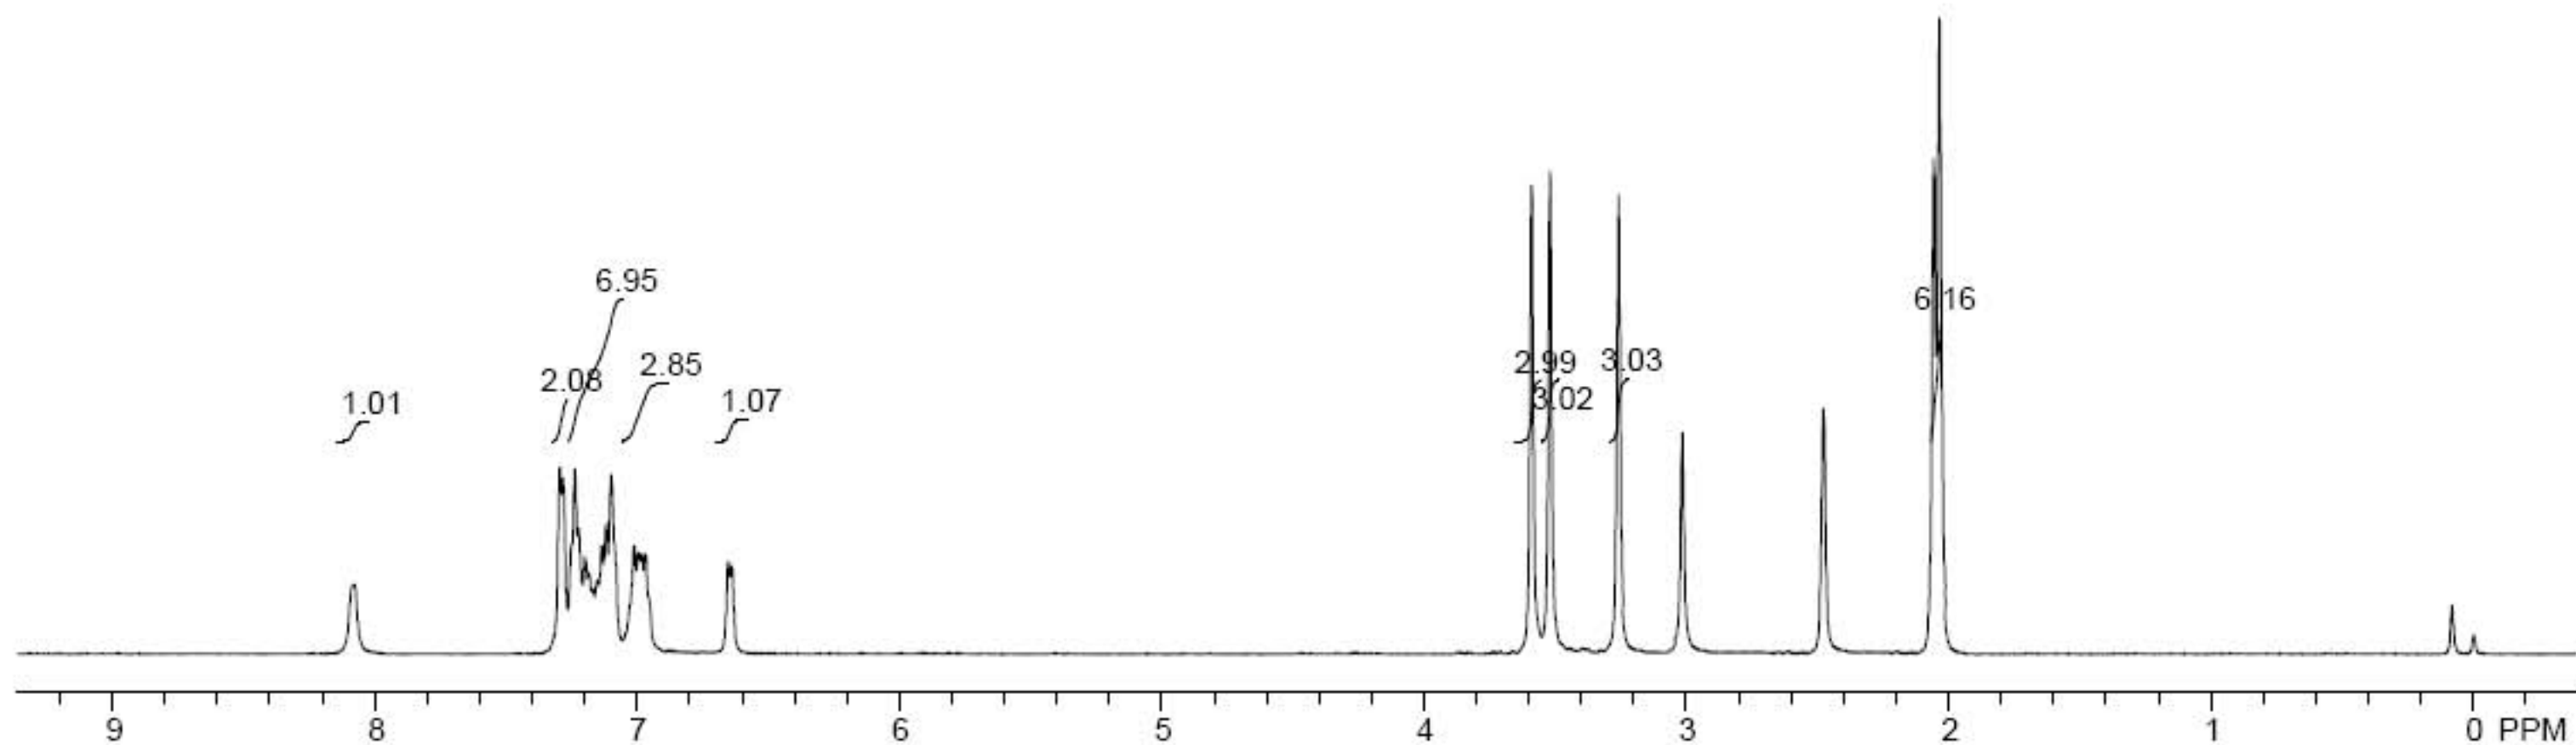

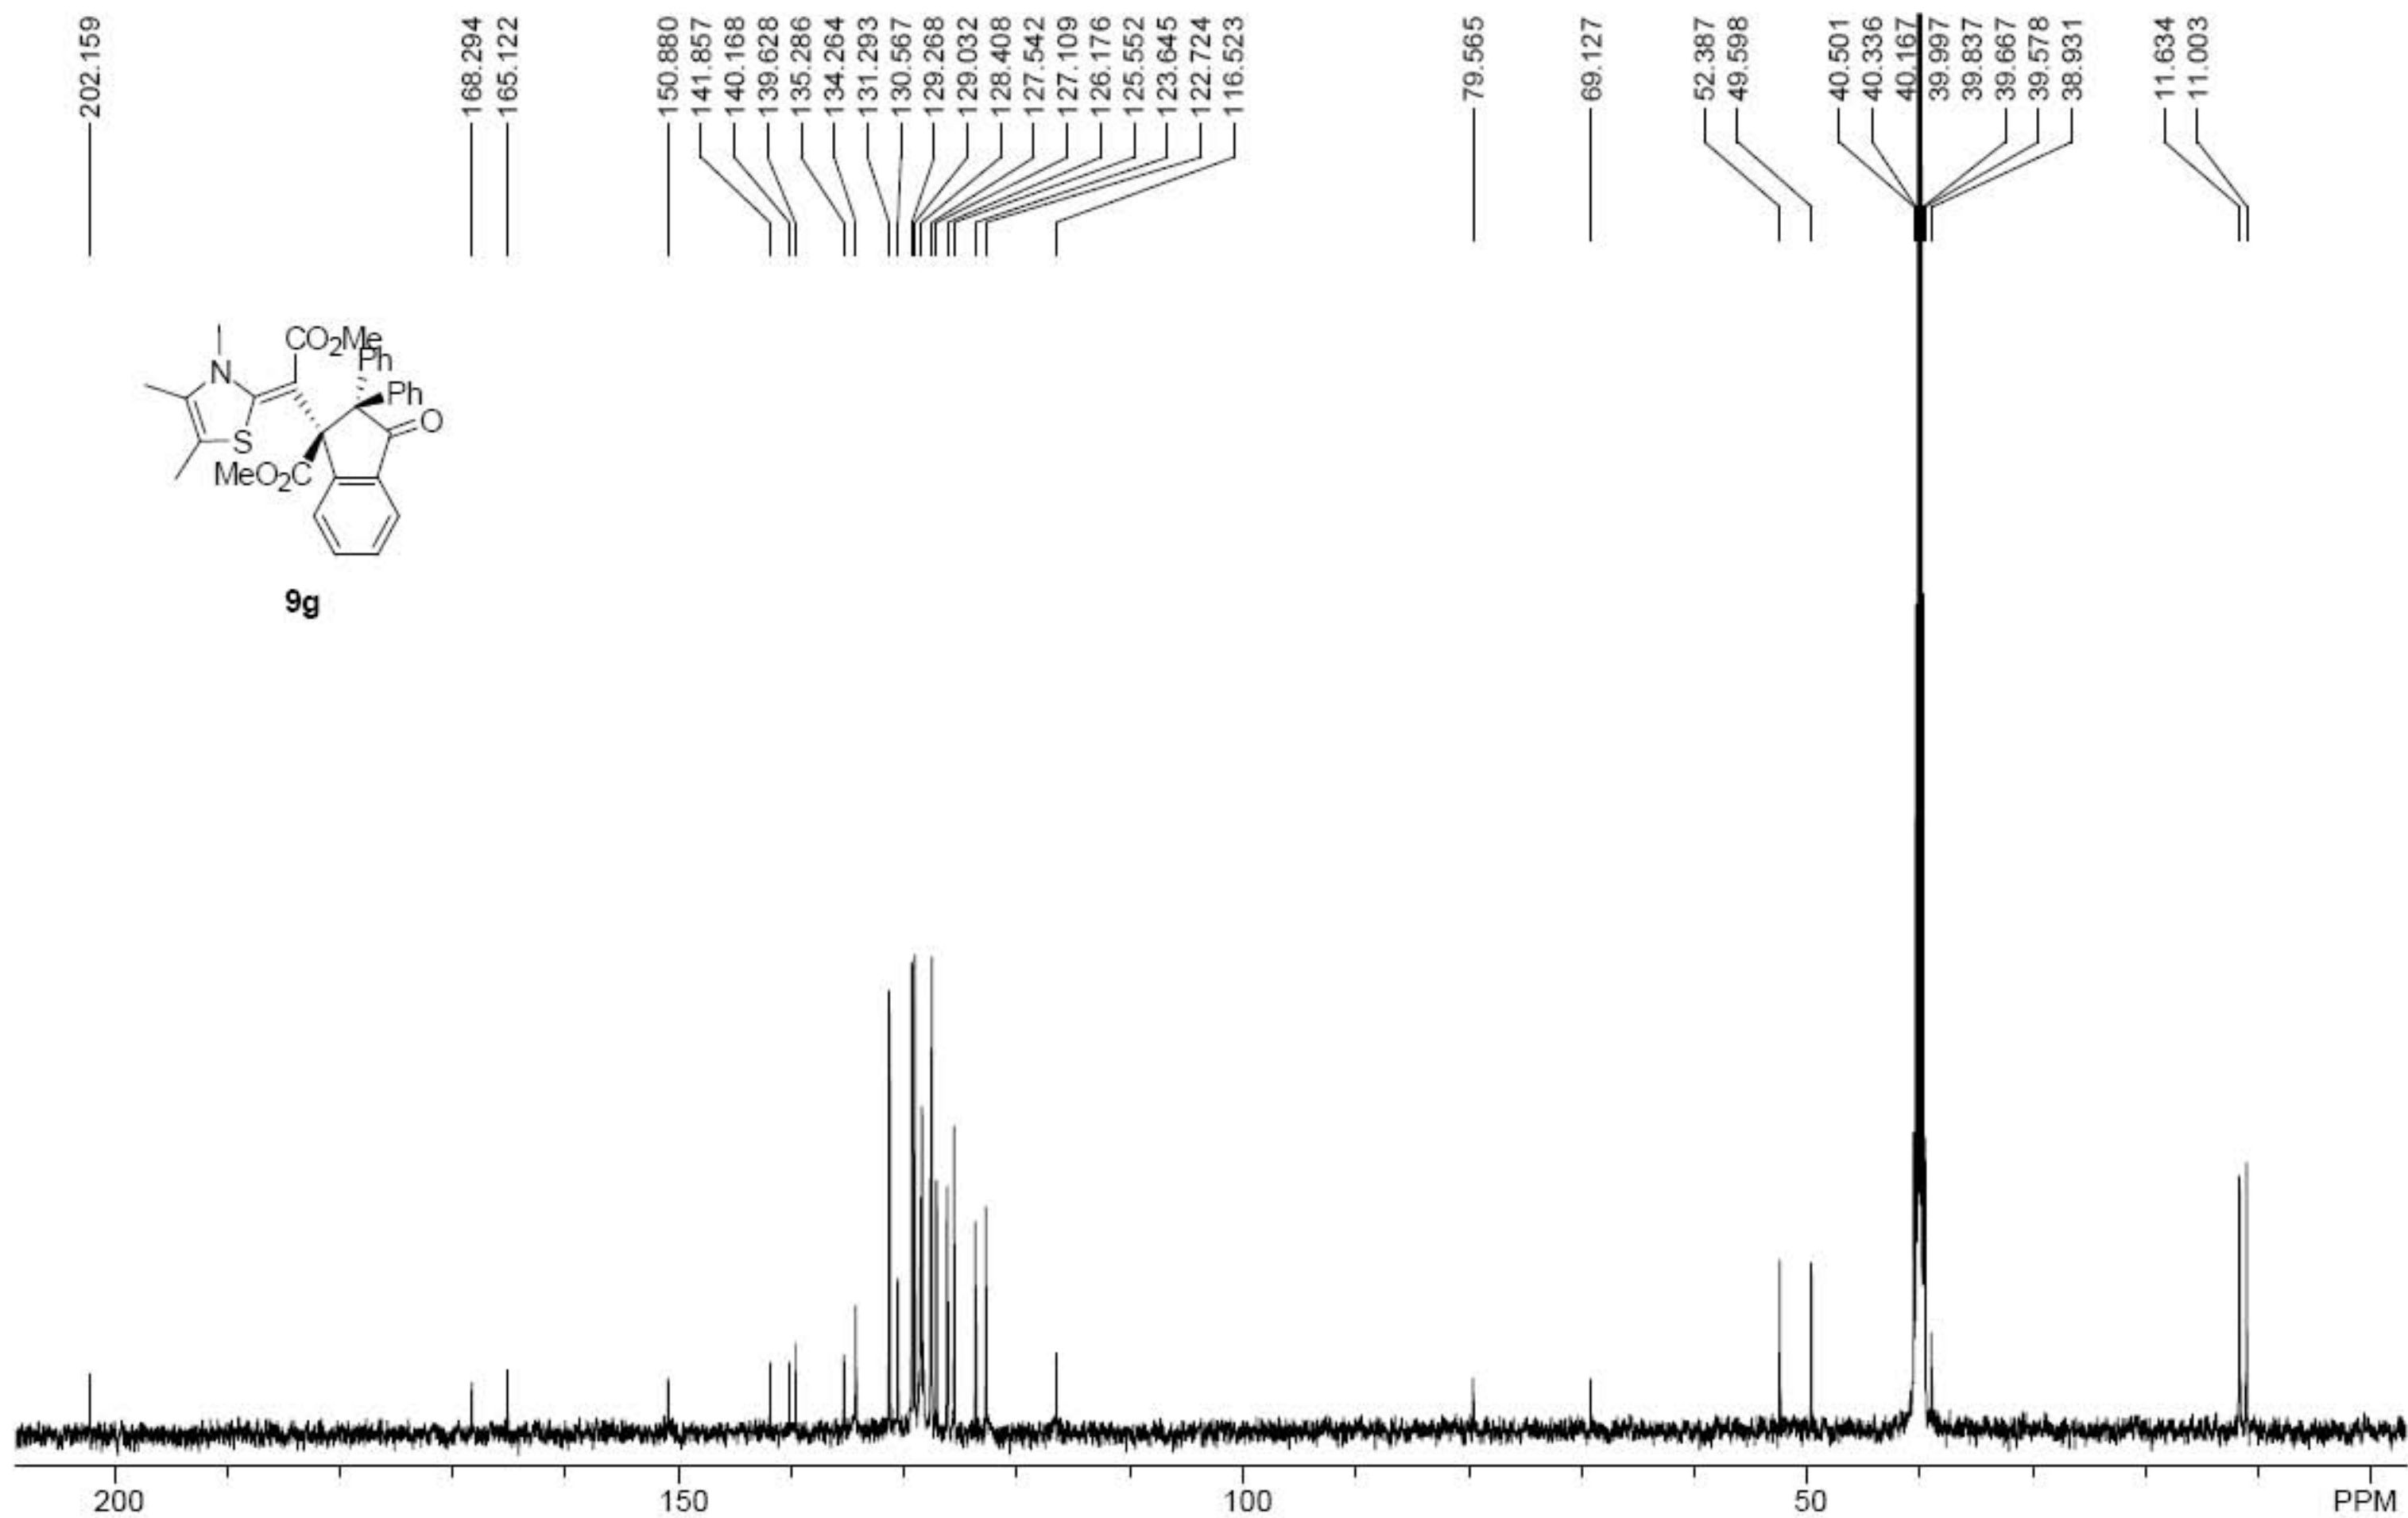

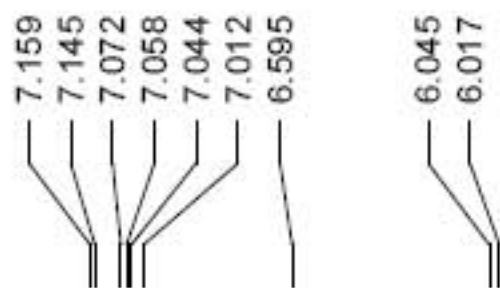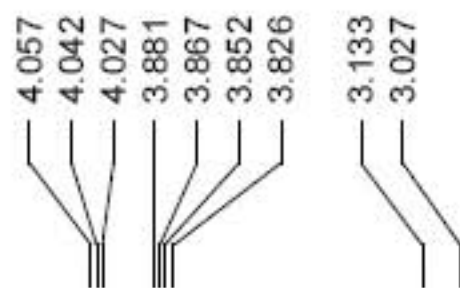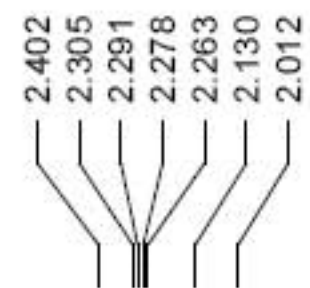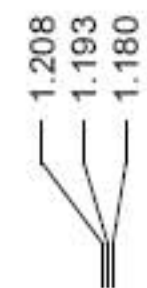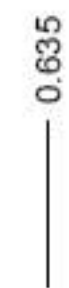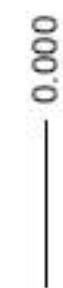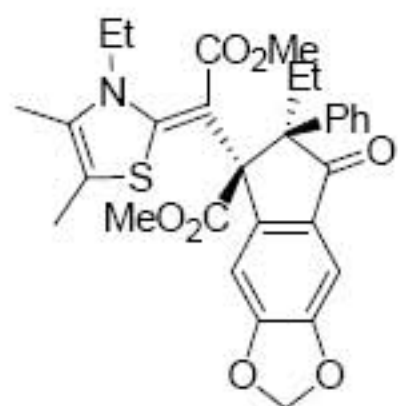

9h

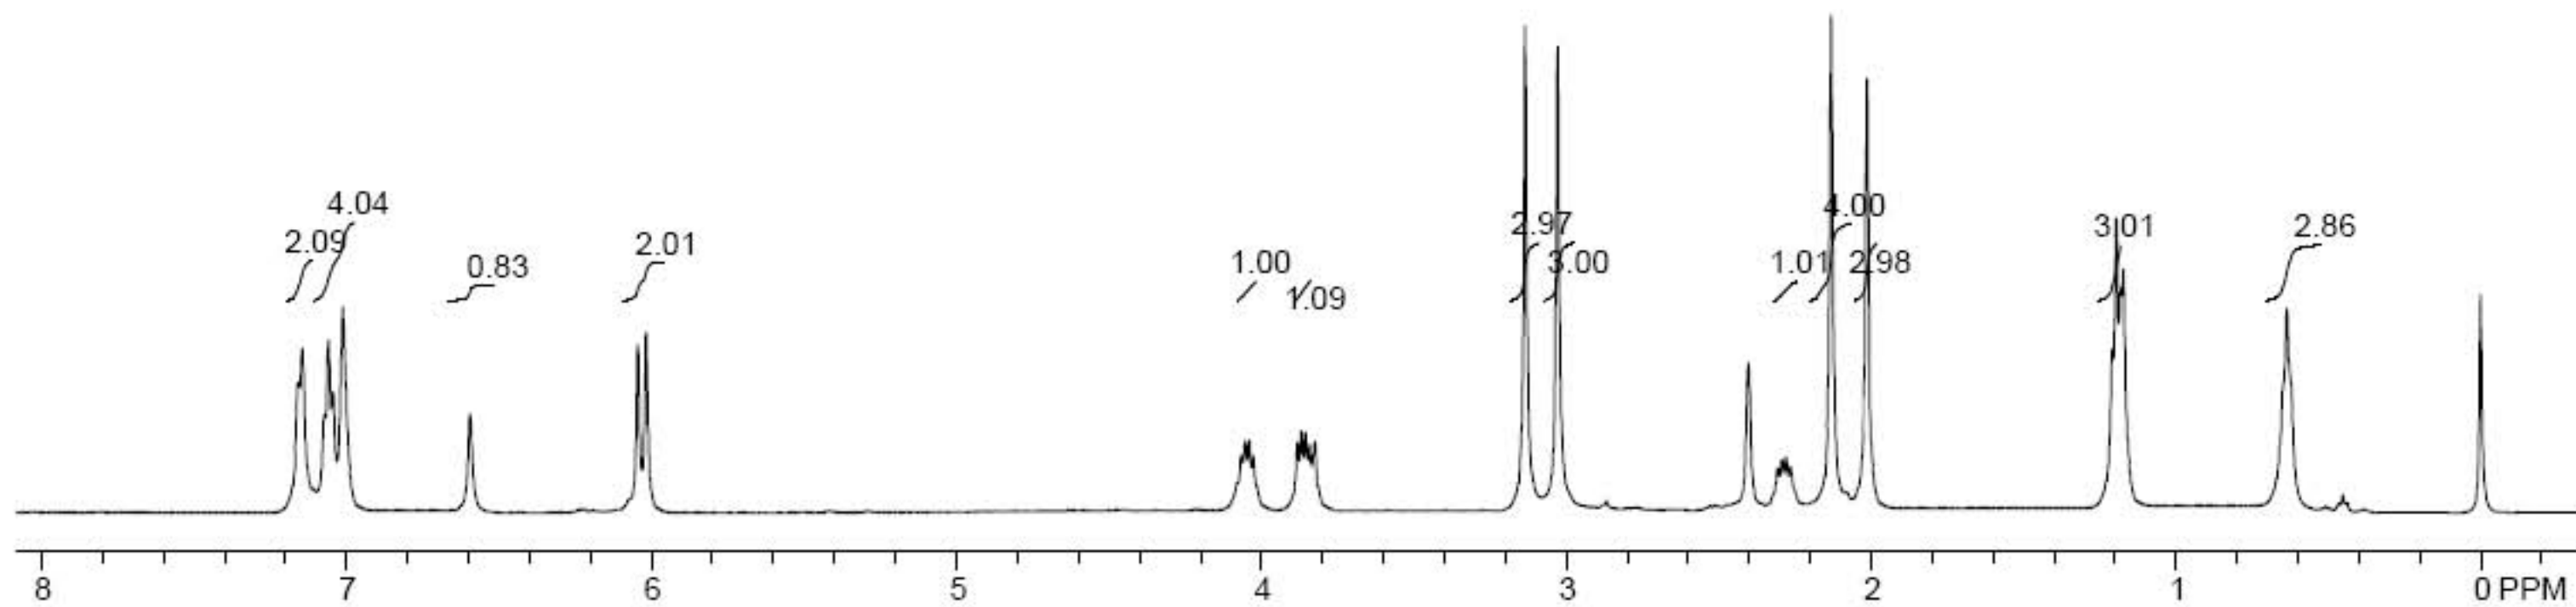

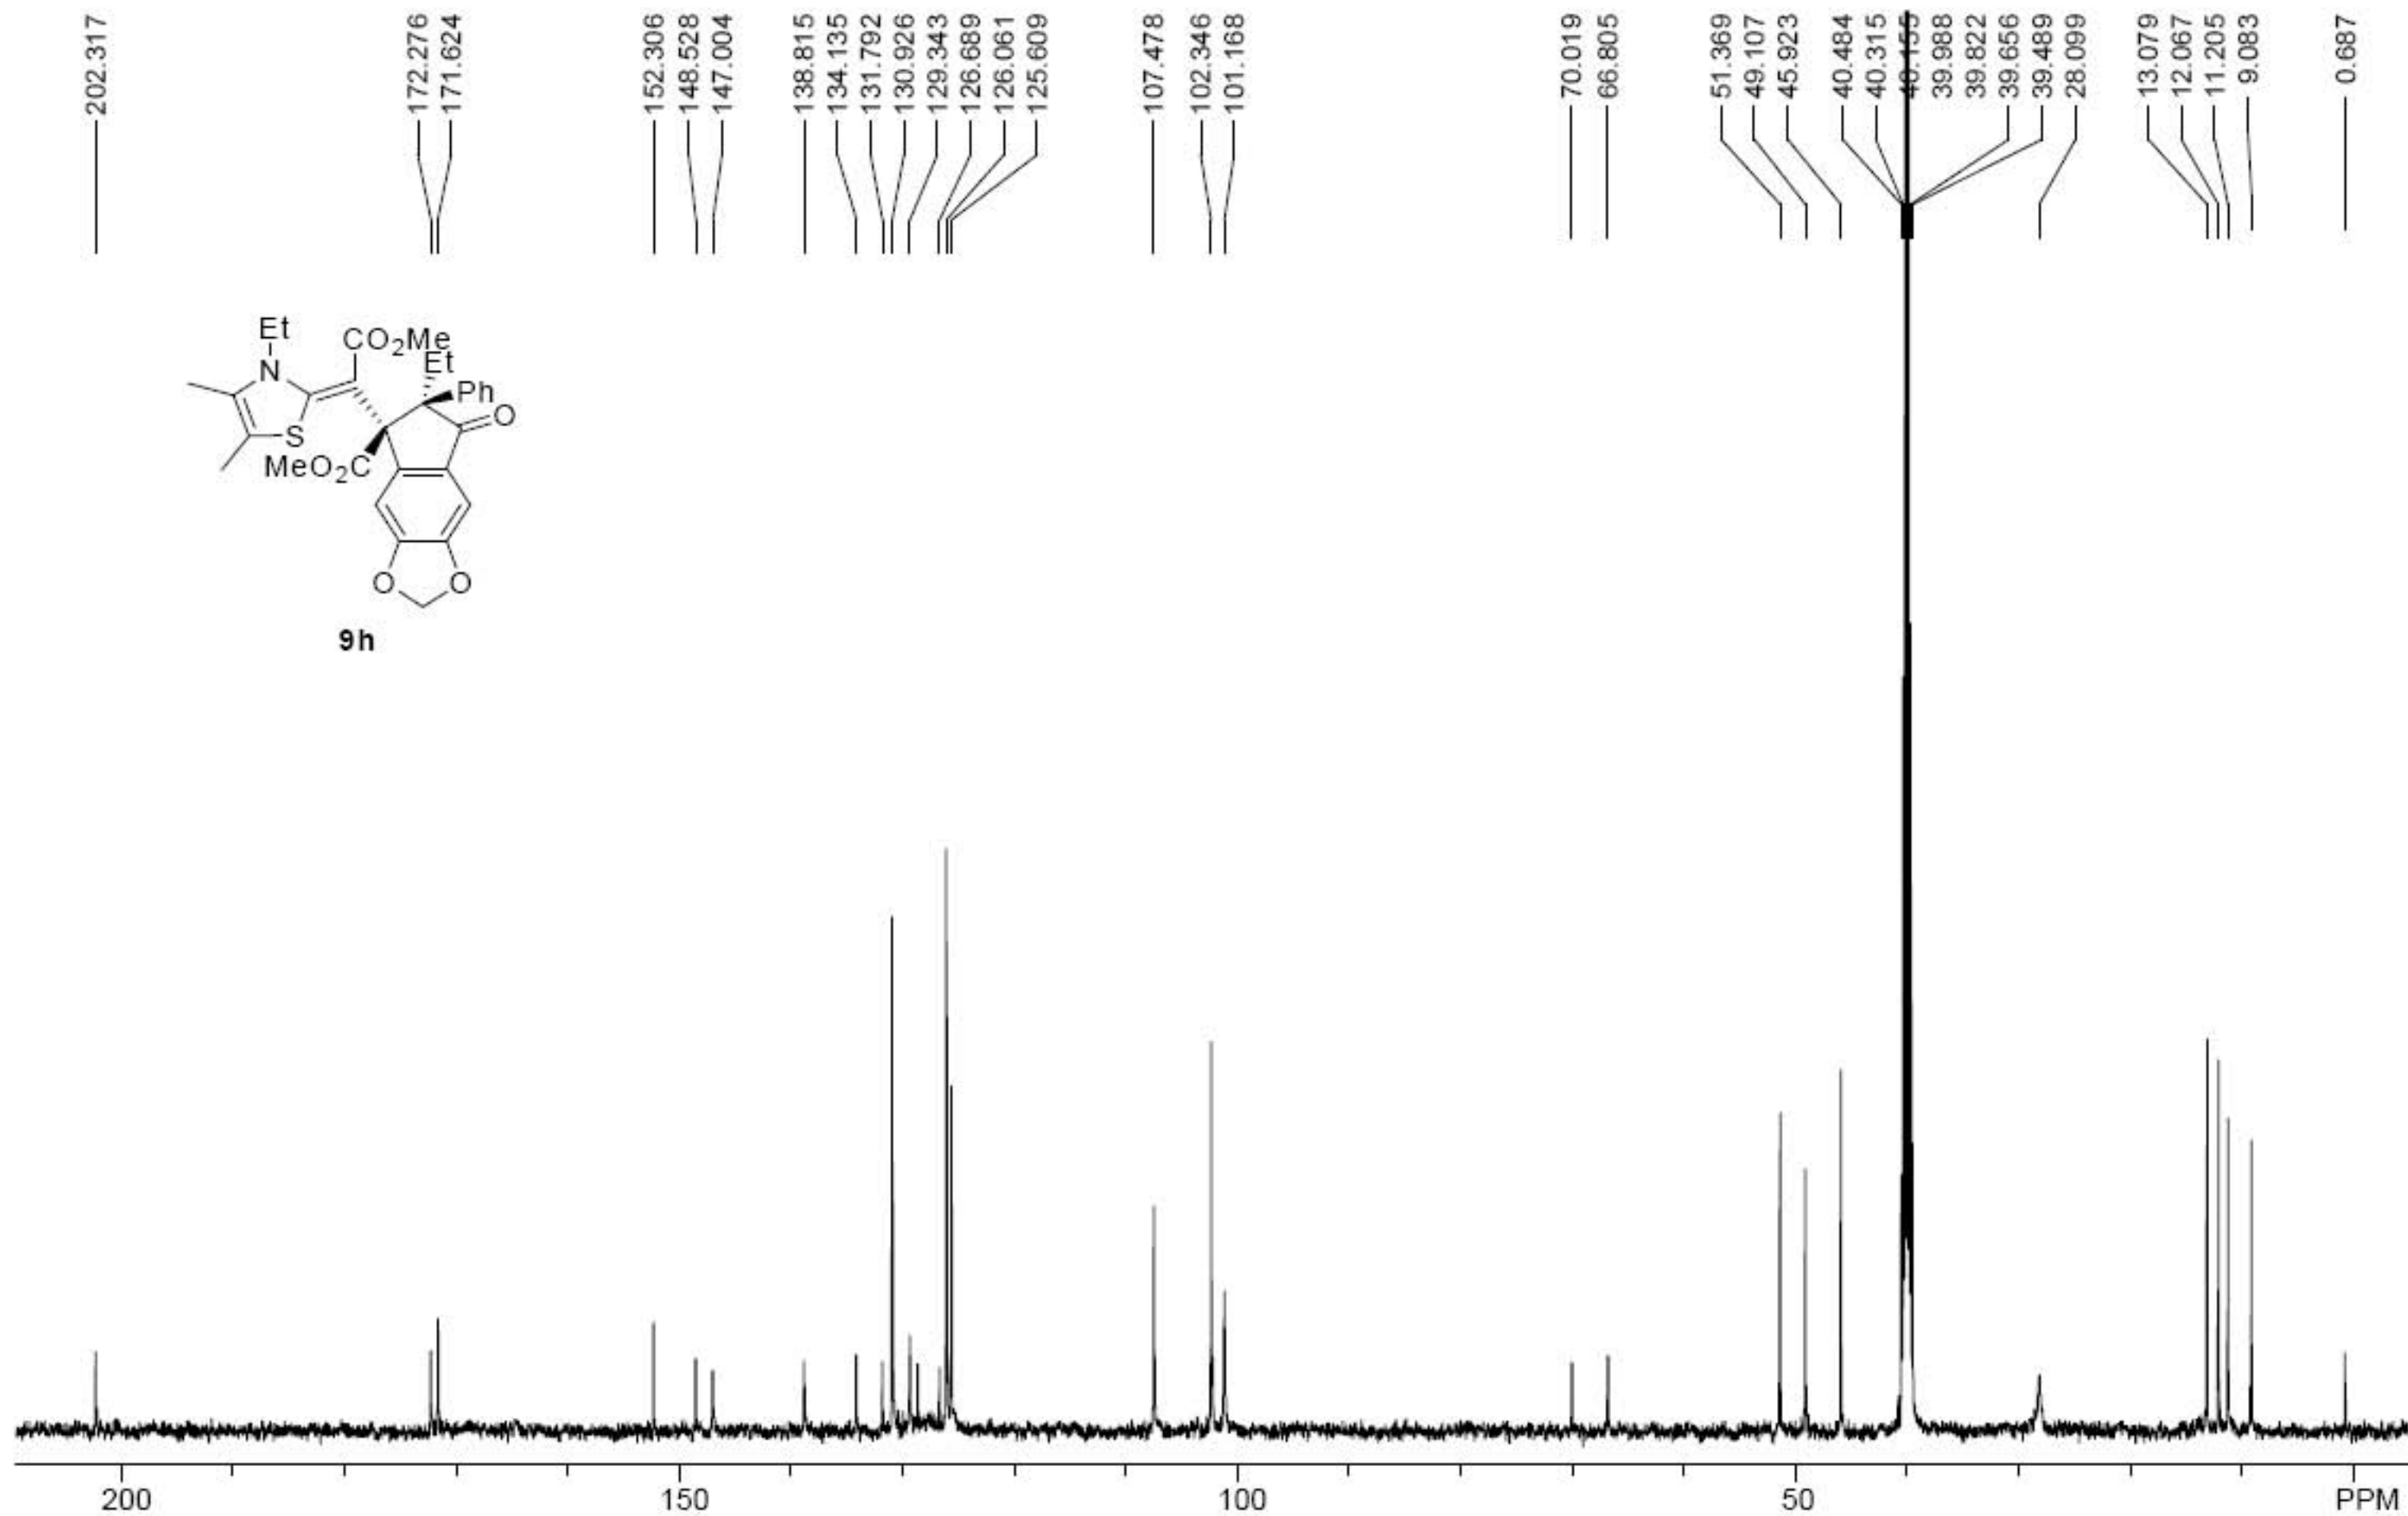

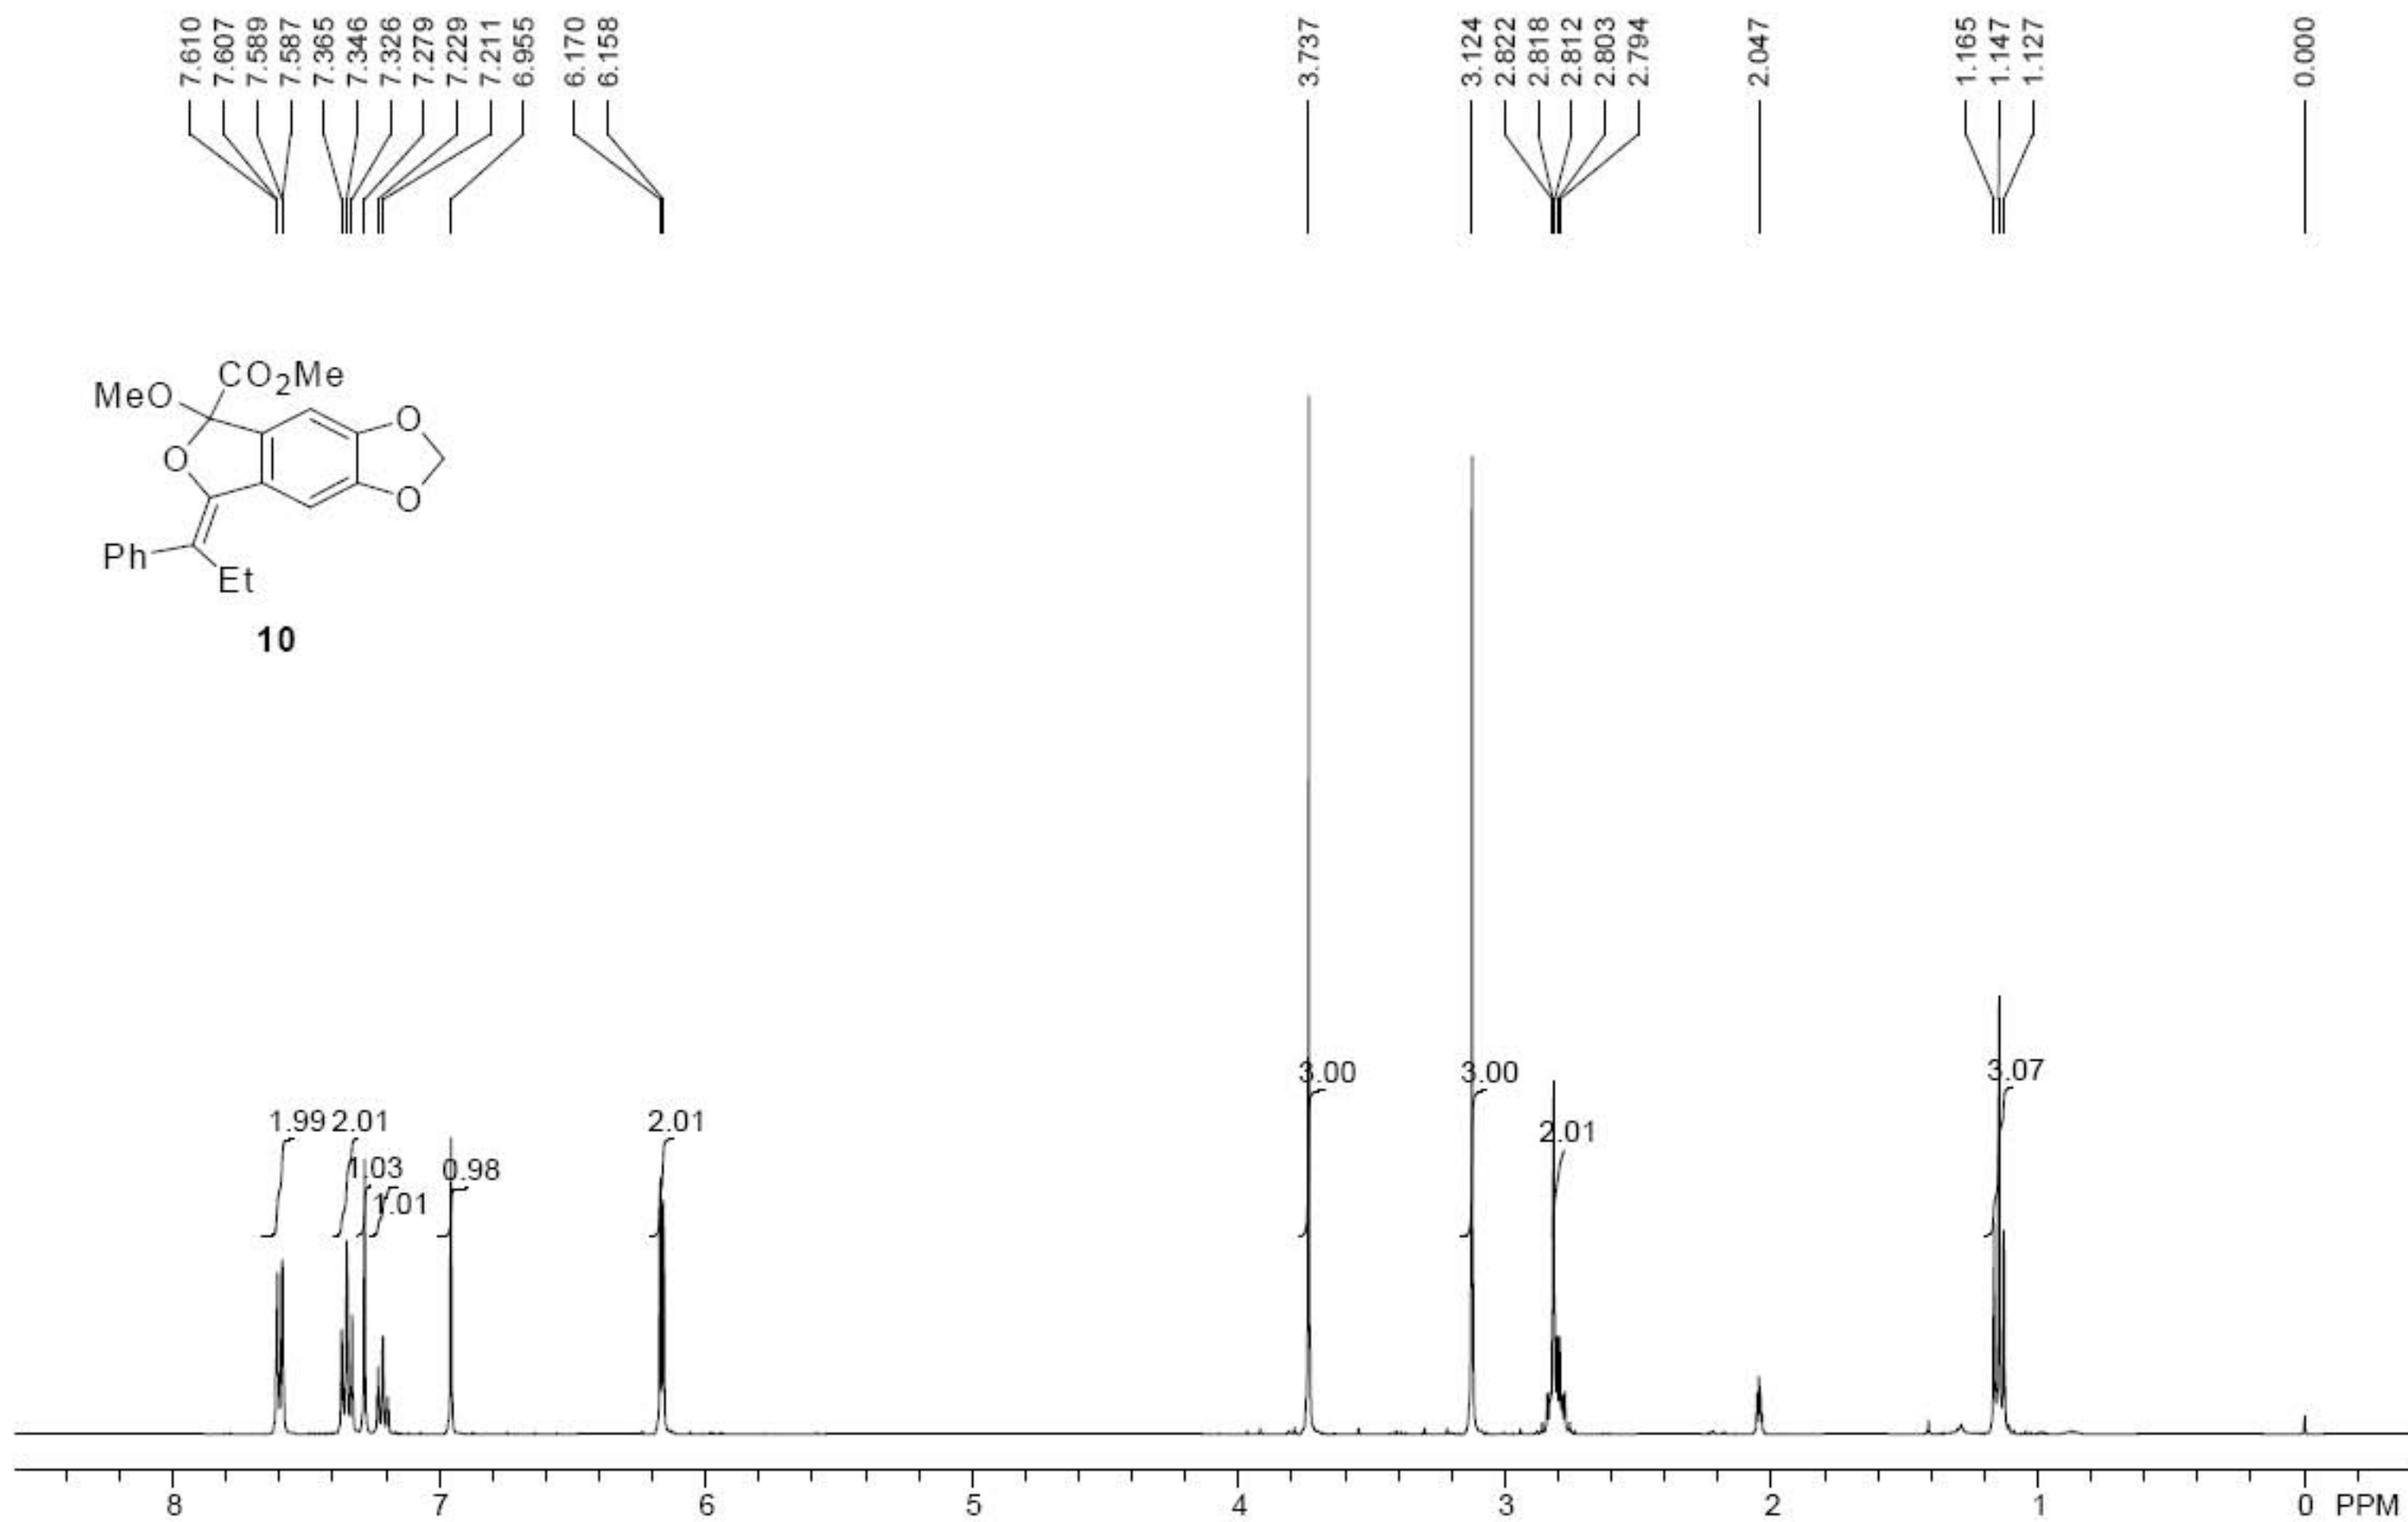

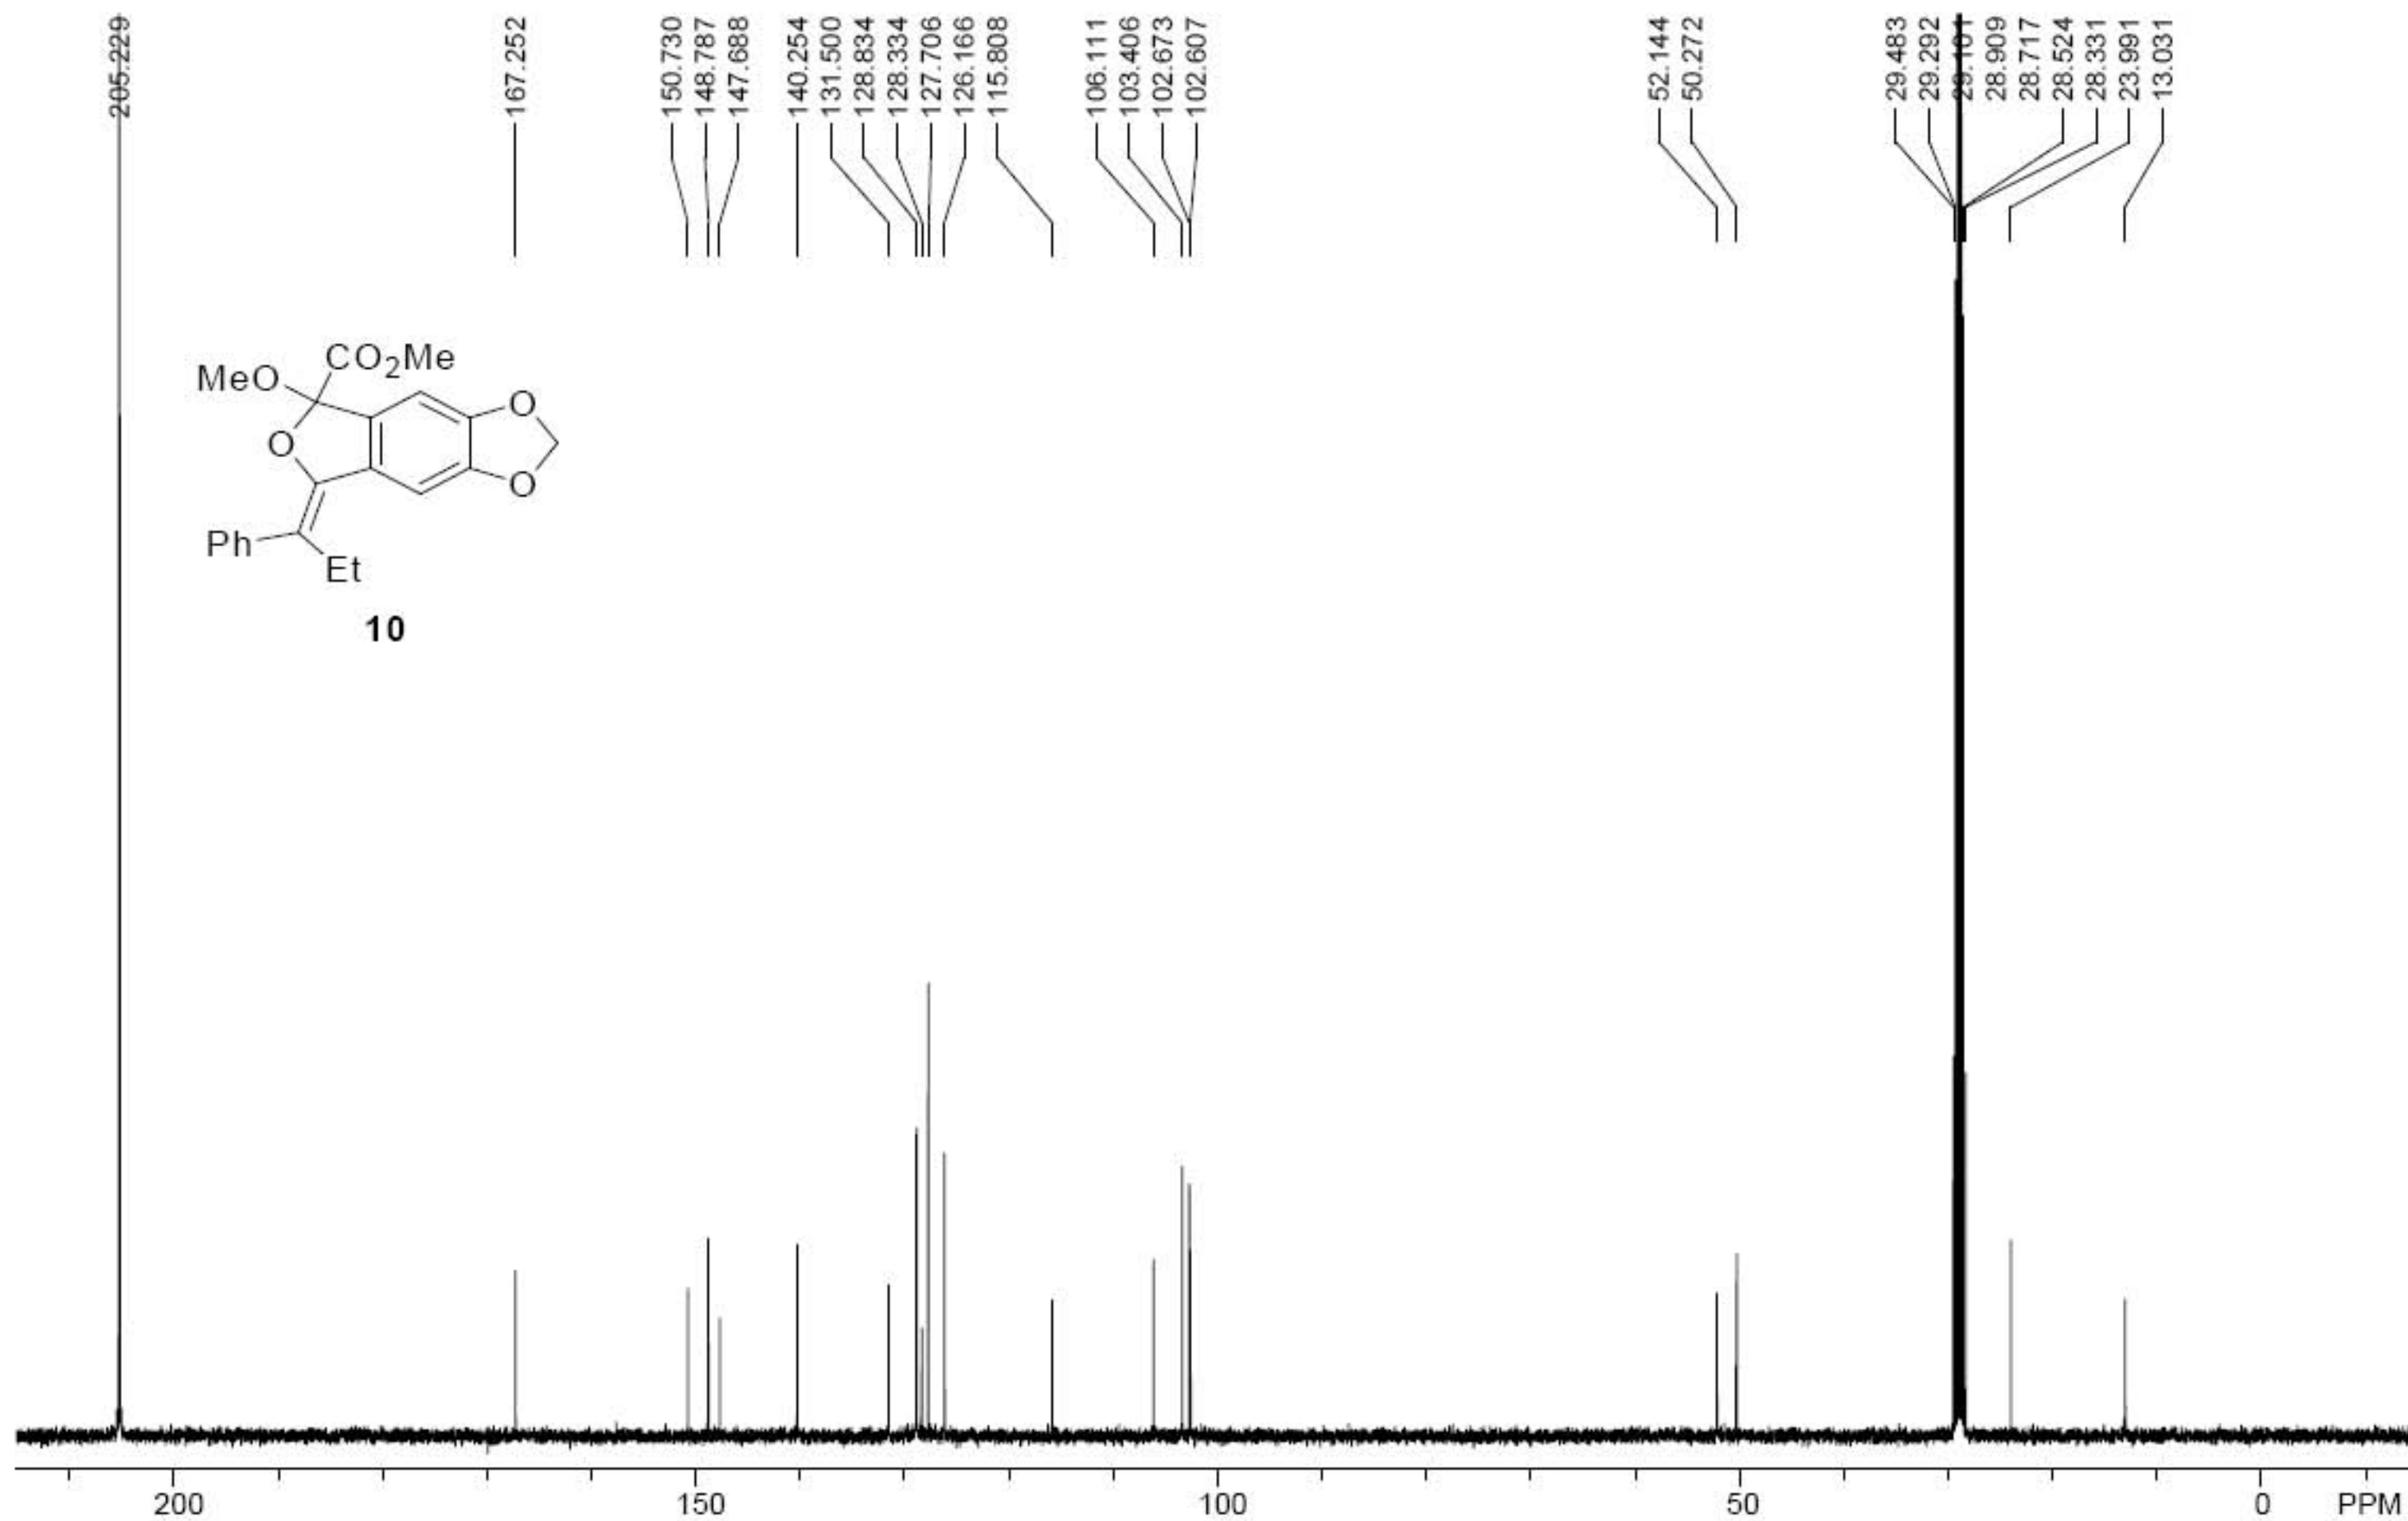

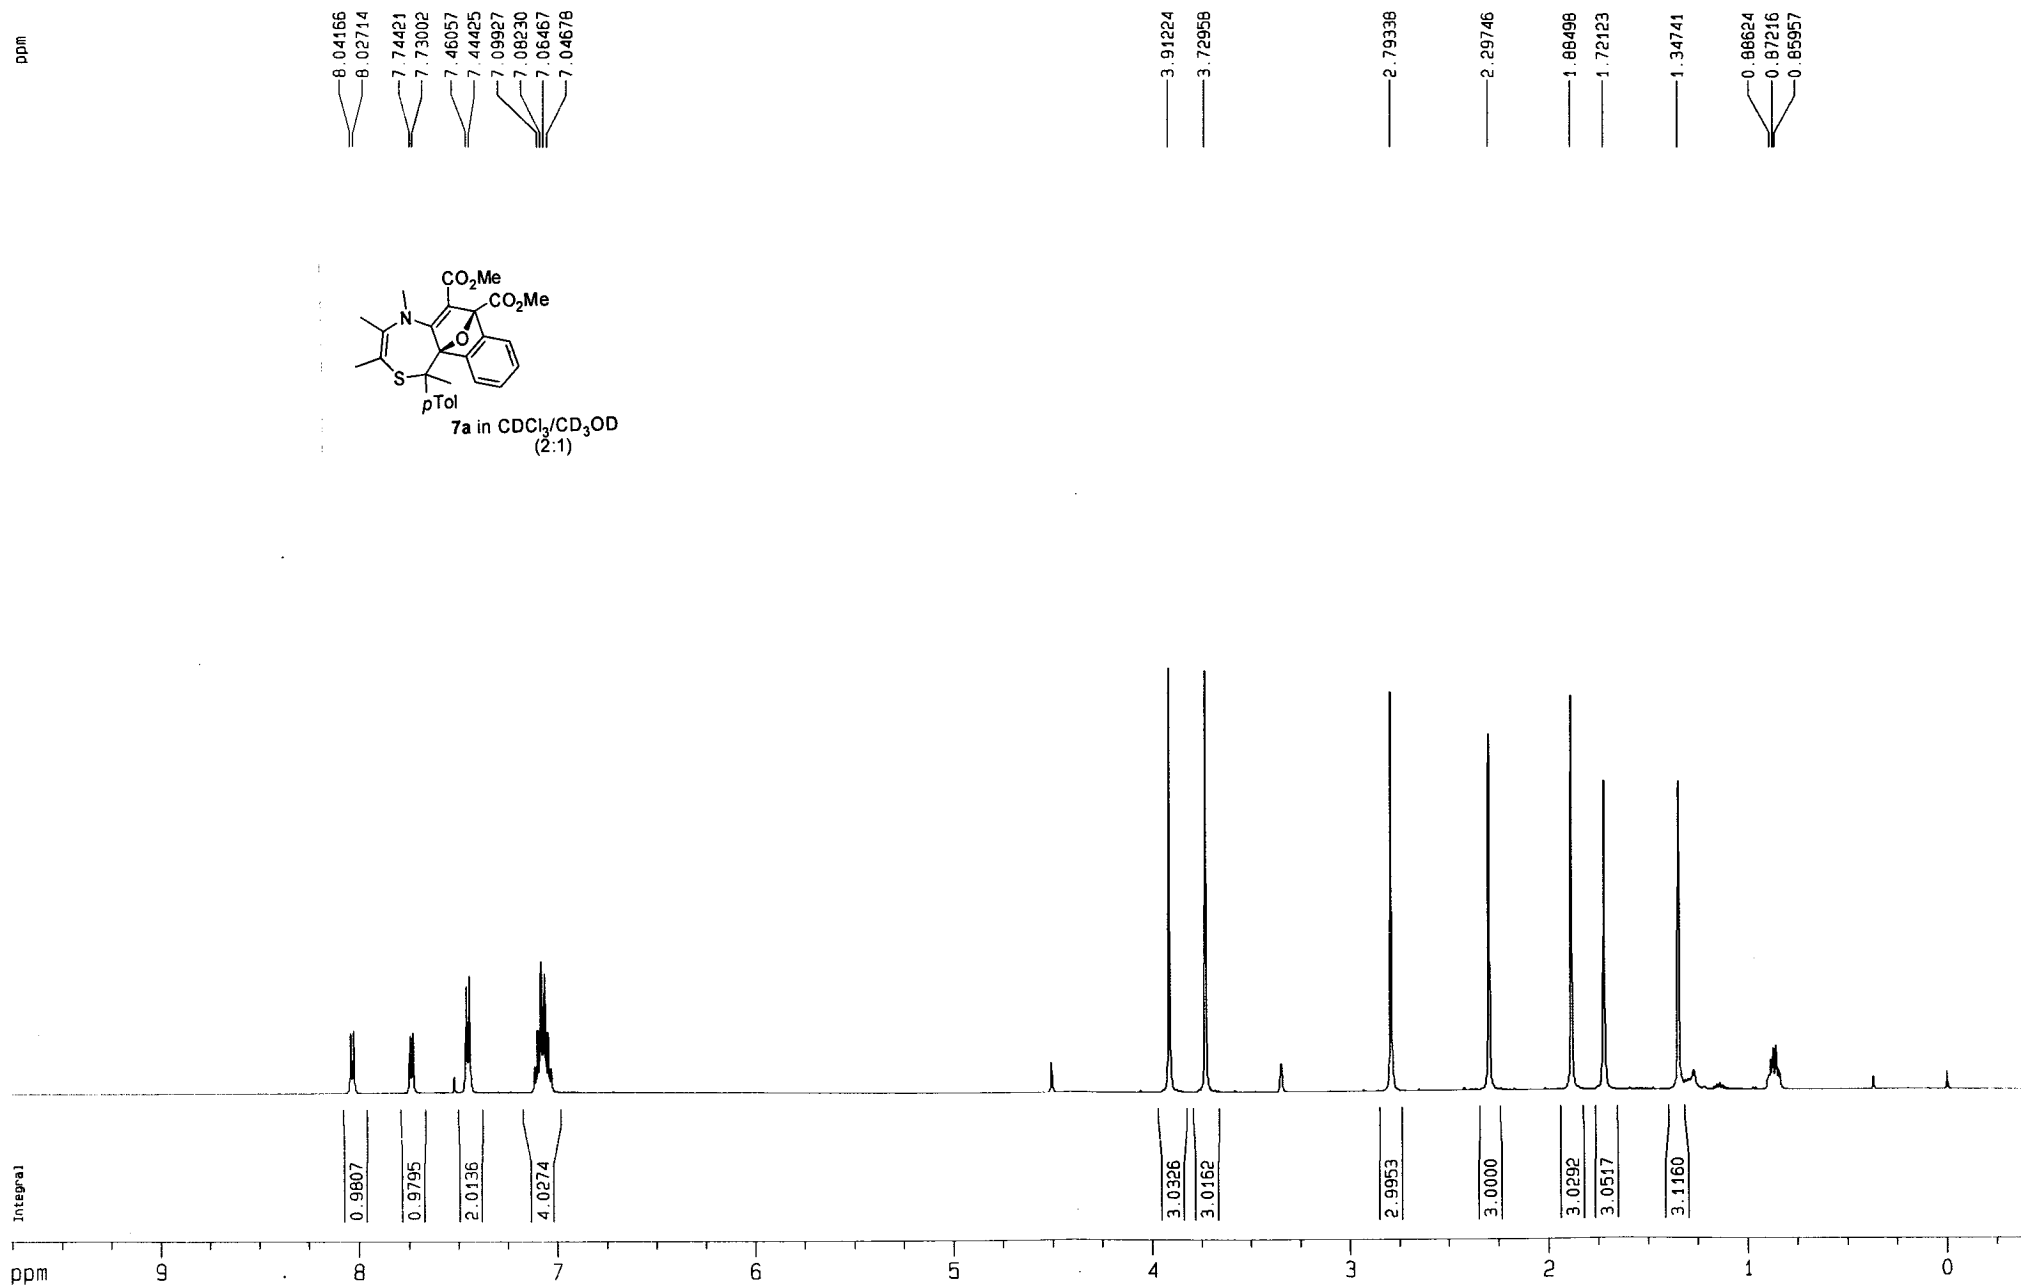



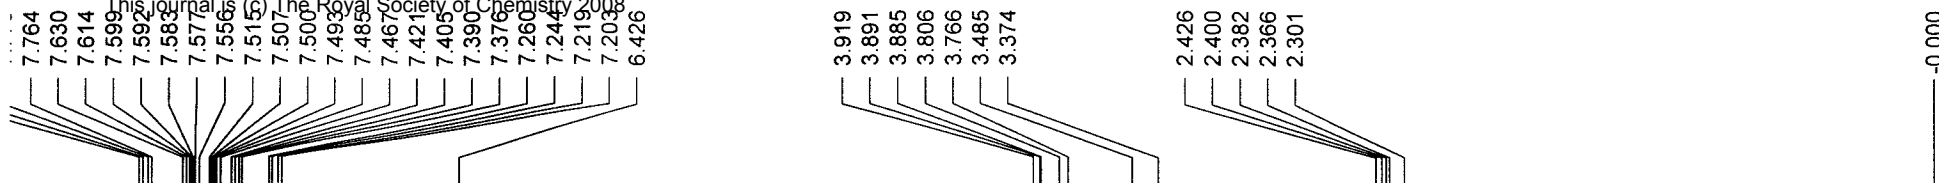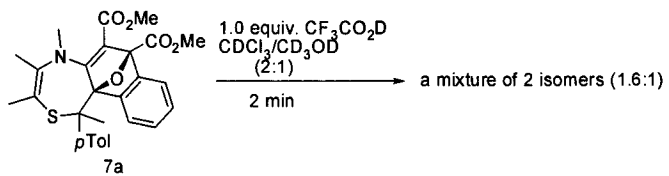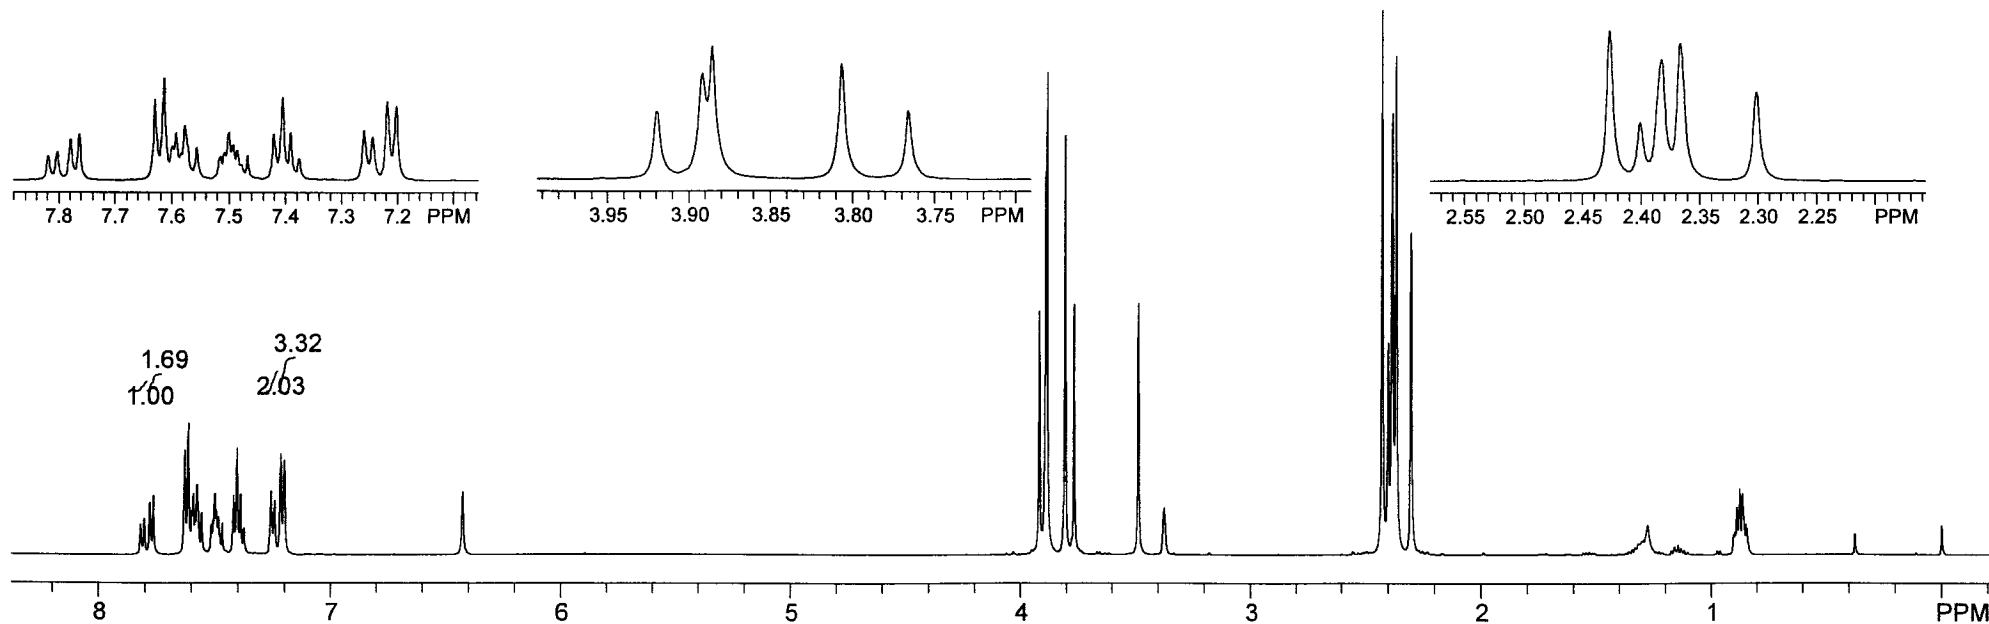

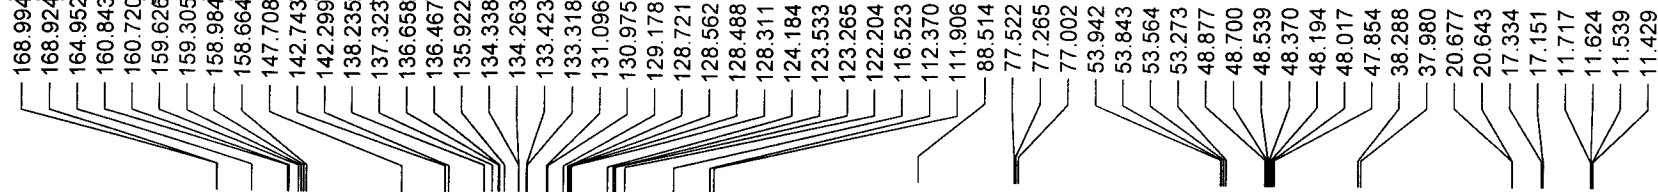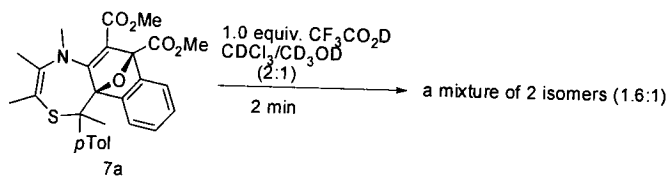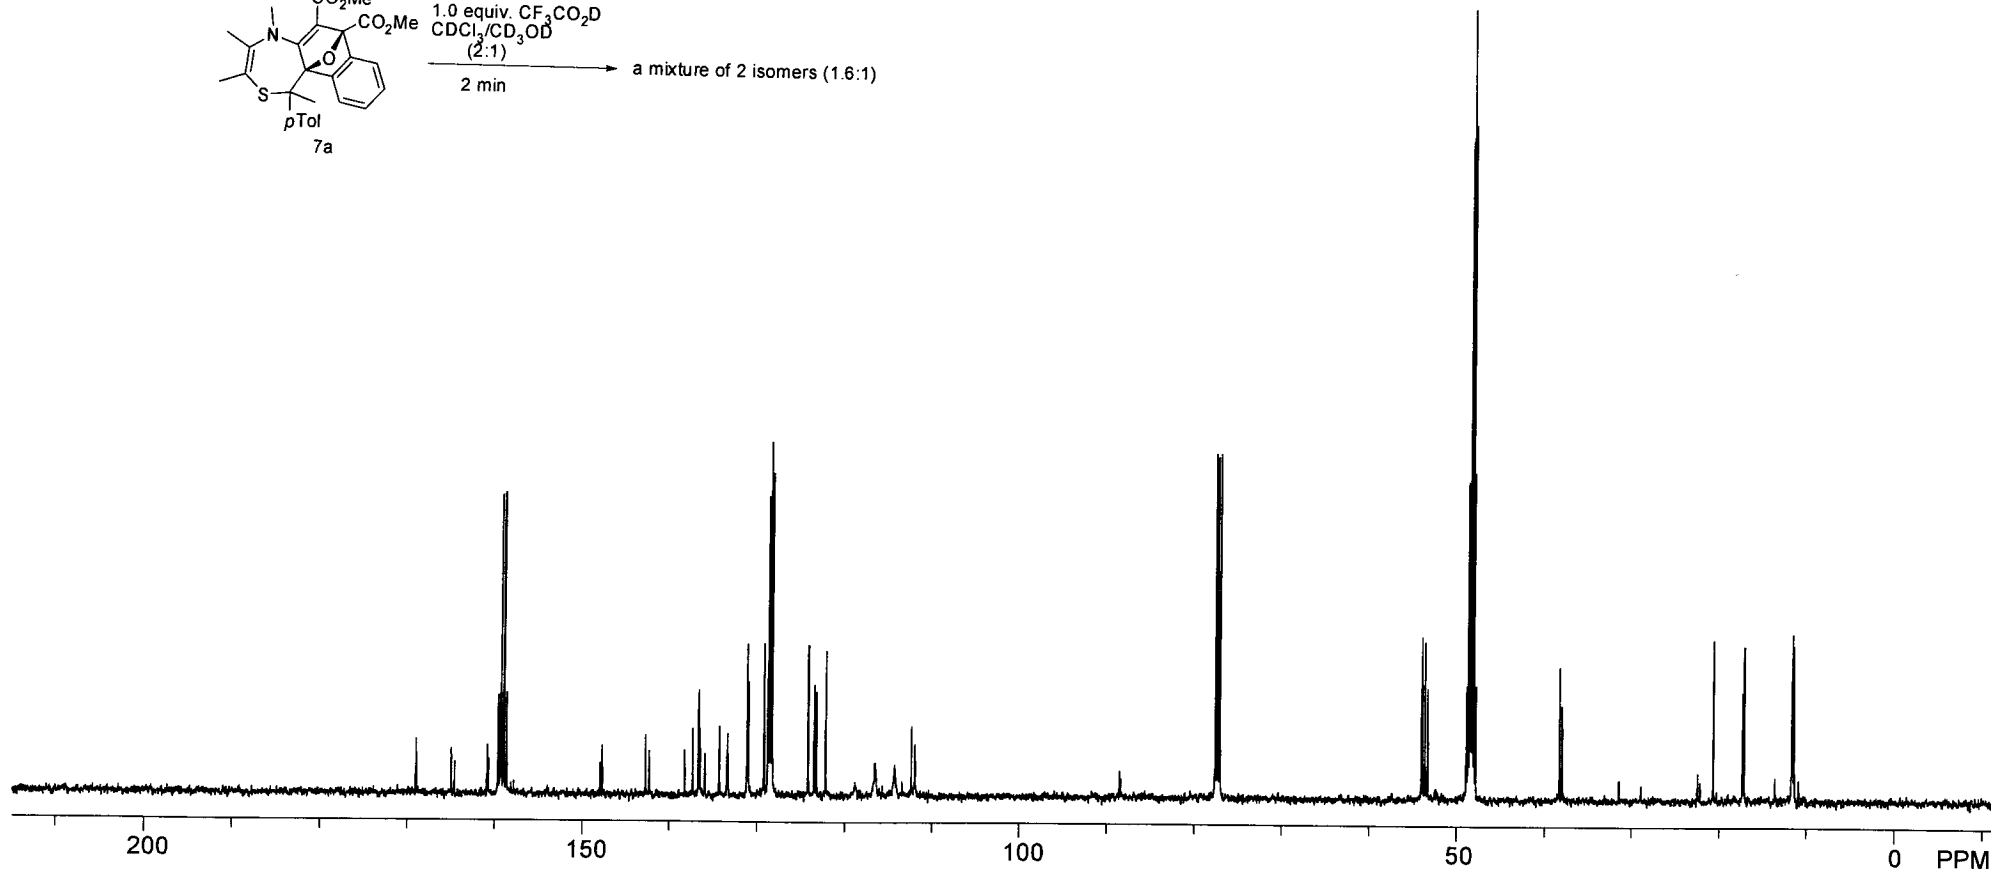

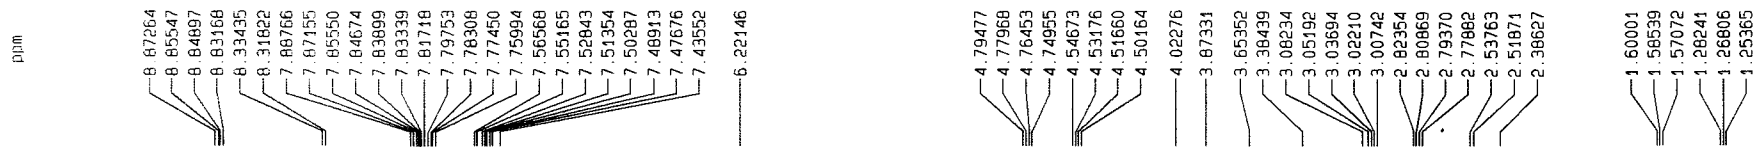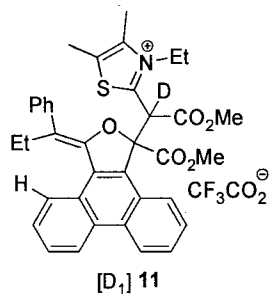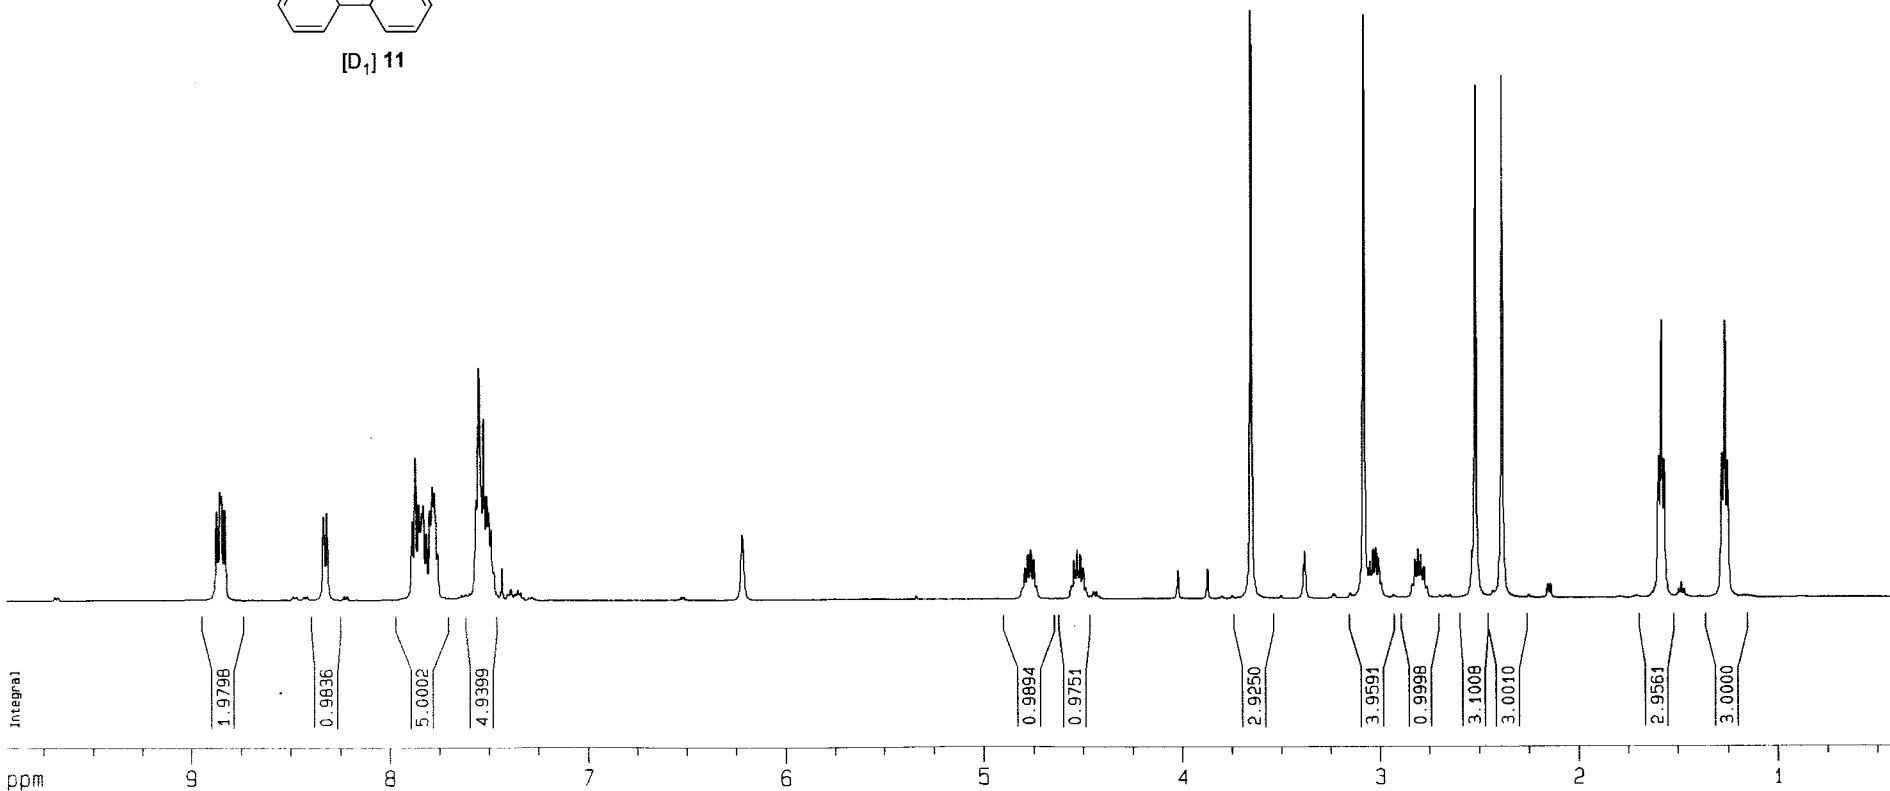

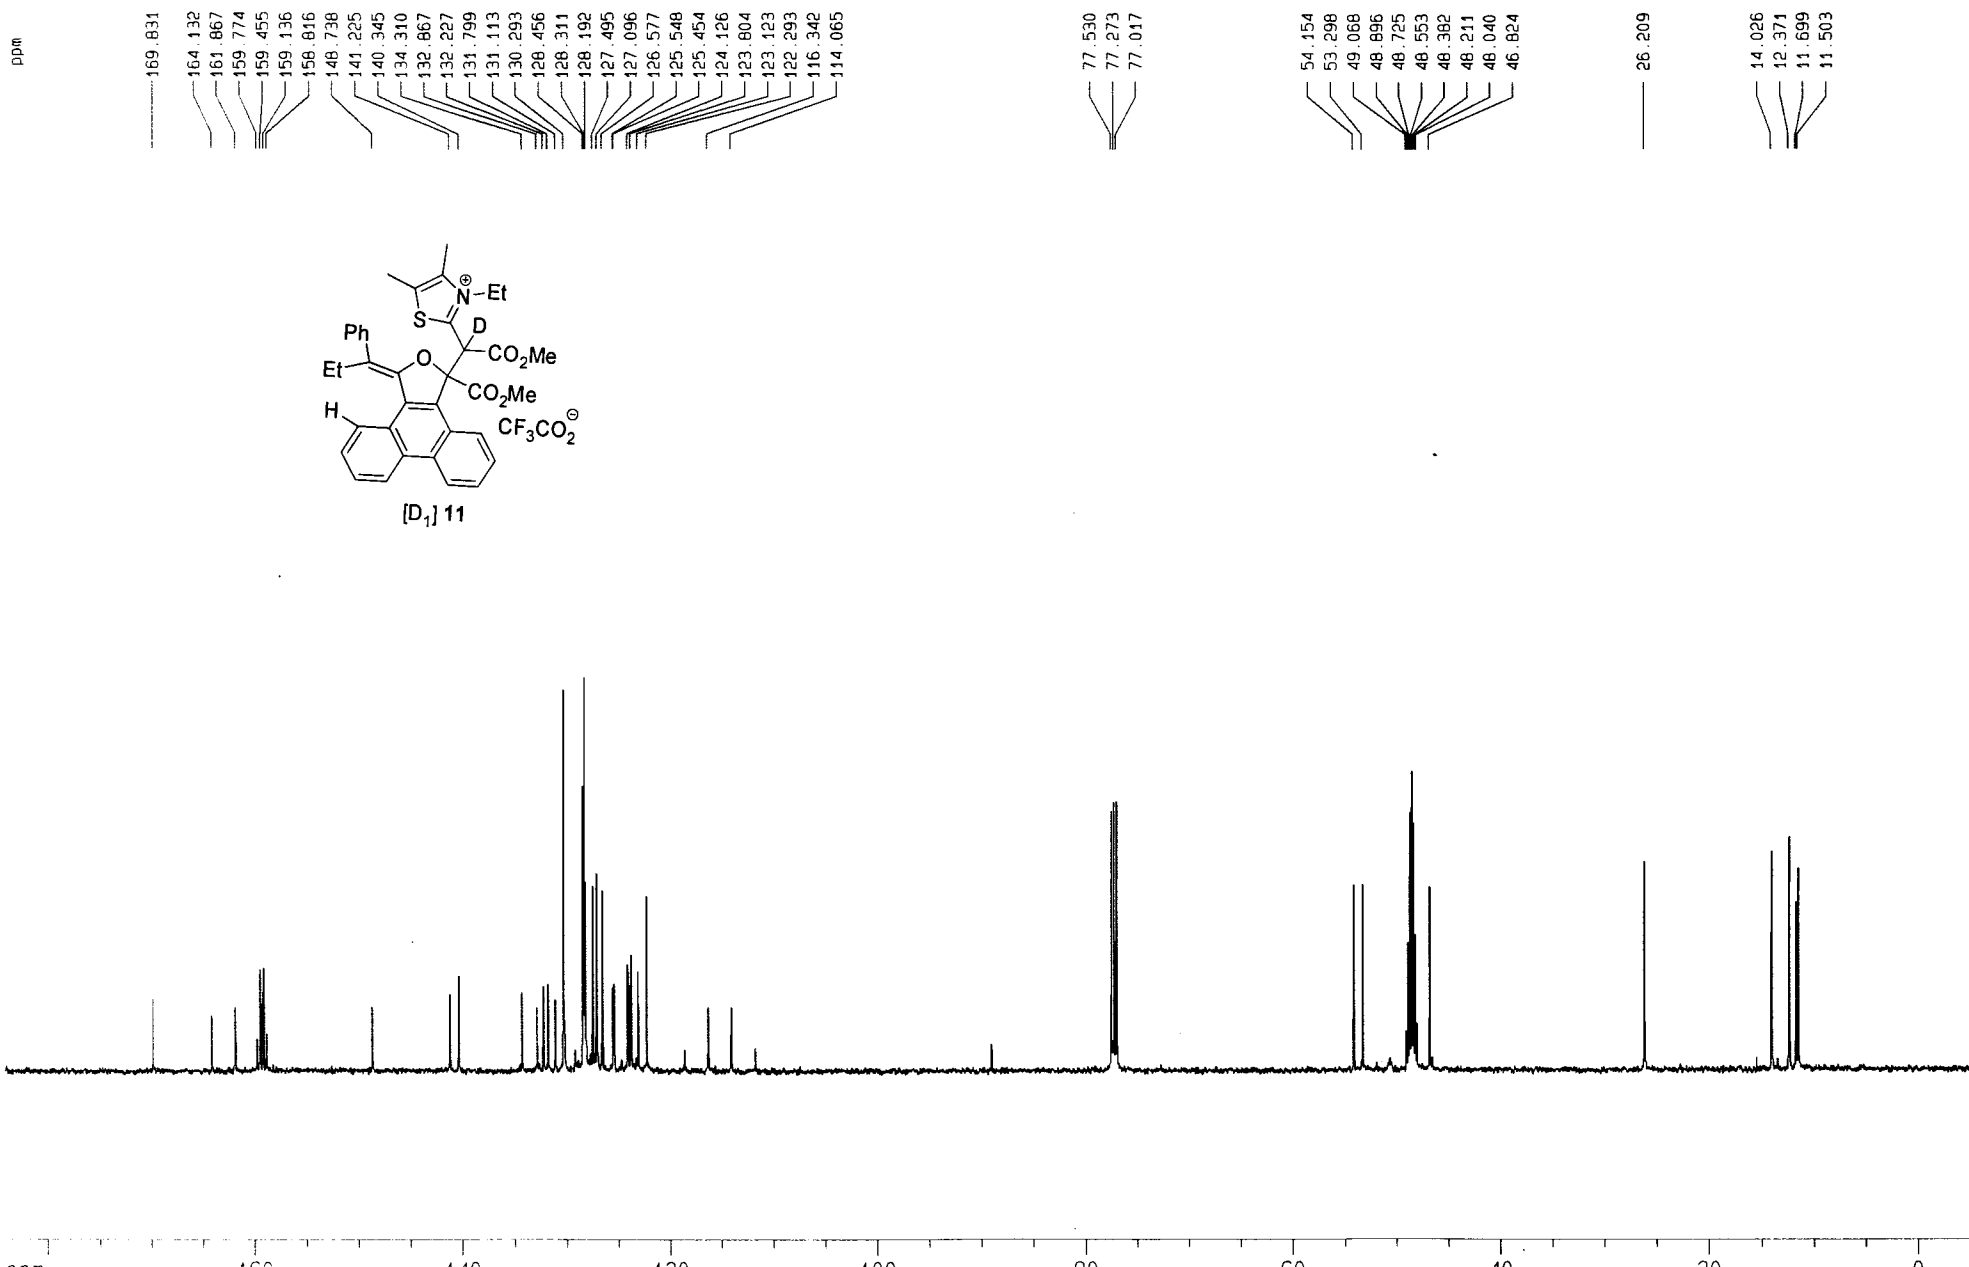

[D<sub>1</sub>]11

HMBC

Supplementary Material (ESI) for Chemical Communications  
This journal is (c) The Royal Society of Chemistry 2008

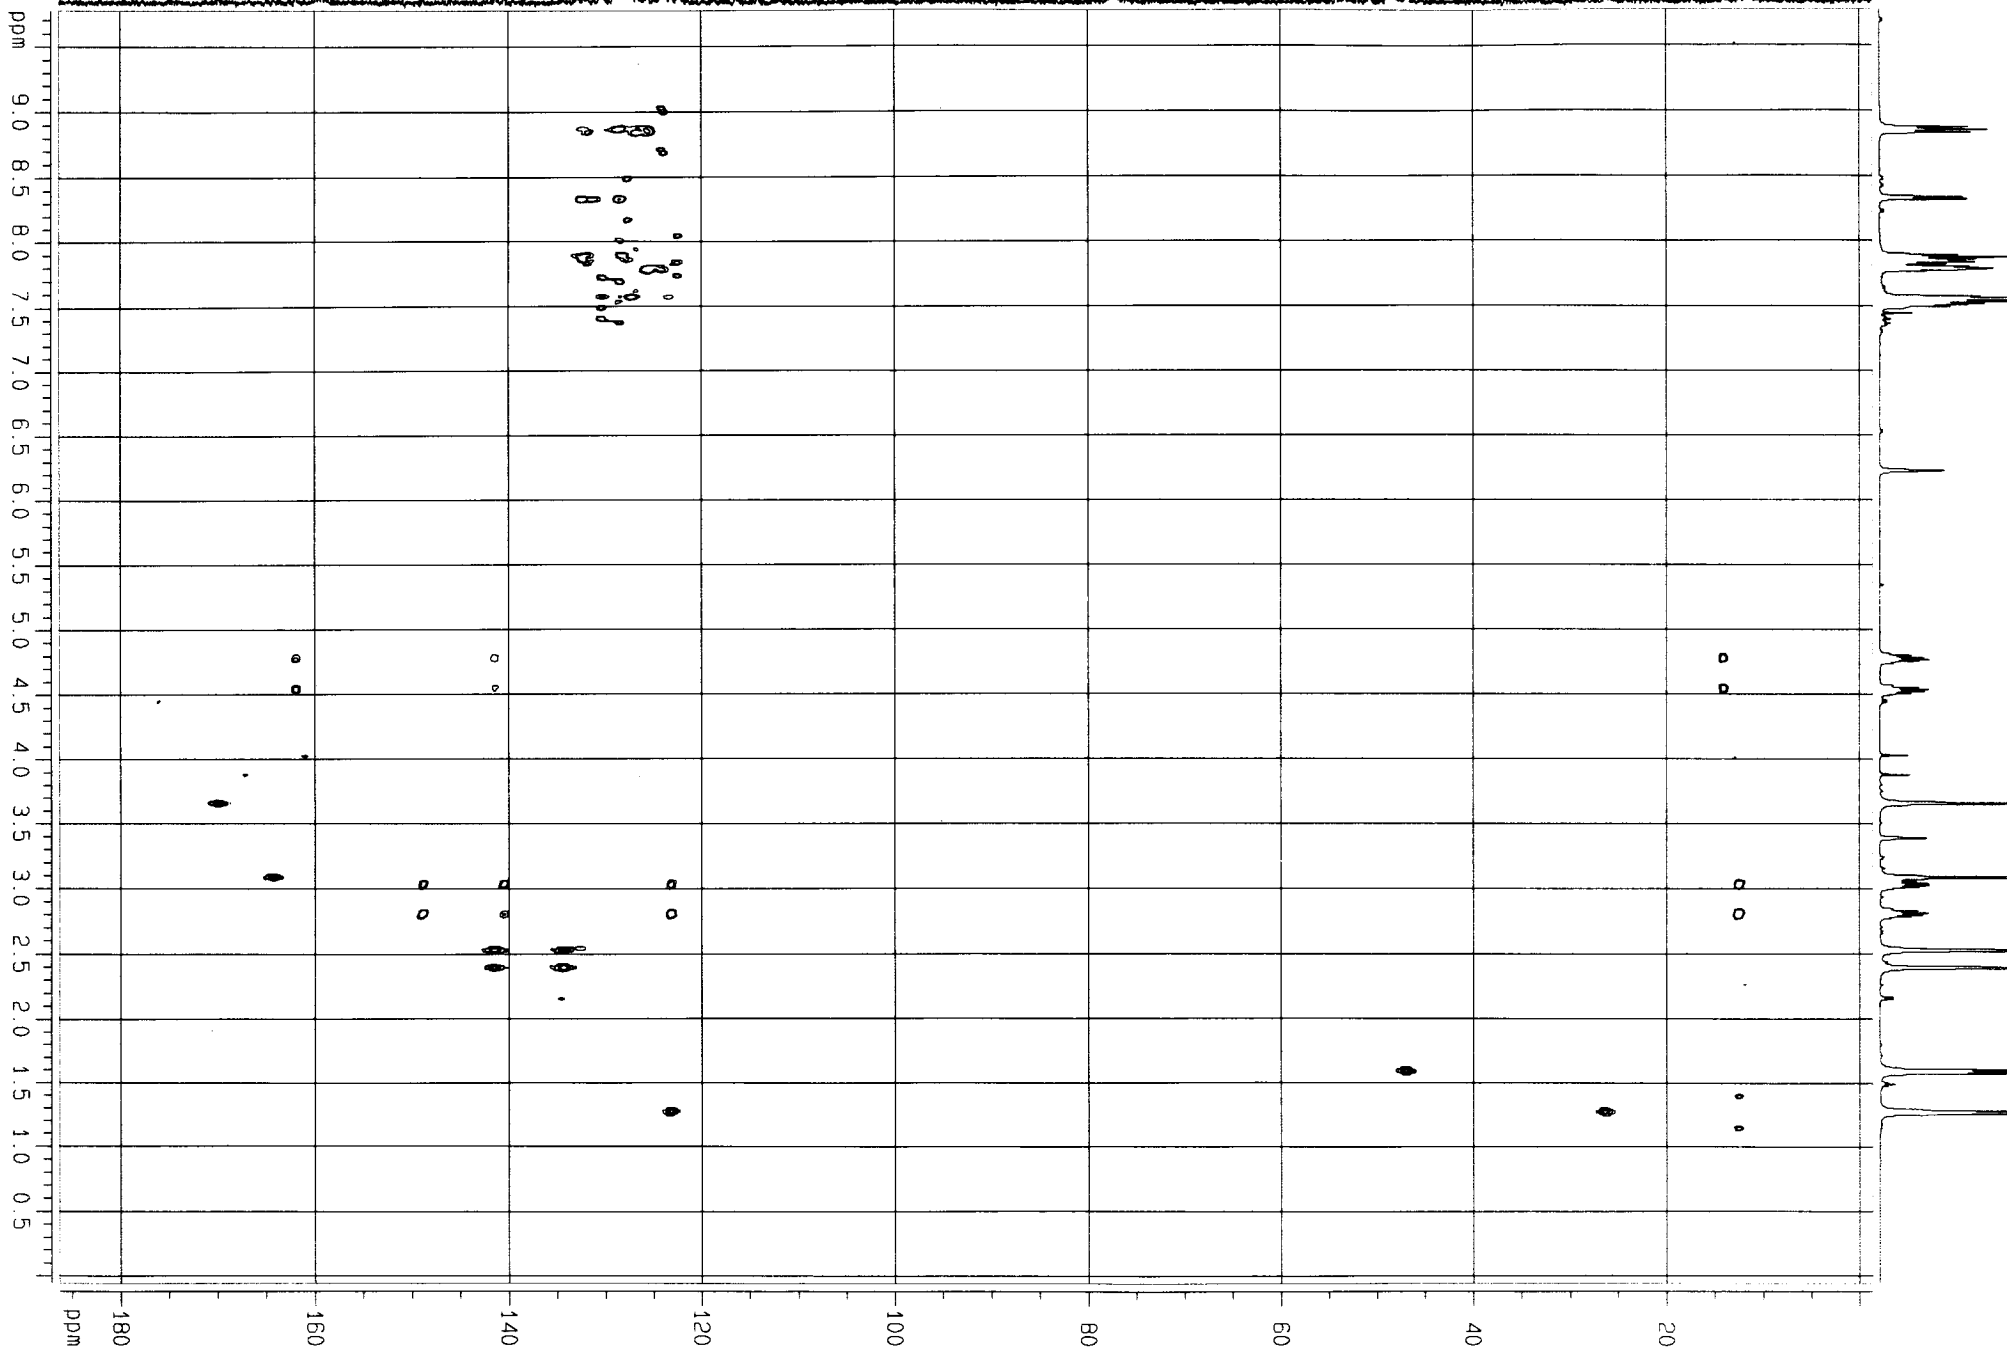

[D<sub>1</sub>]11

HMBC

Supplementary Material (ESI) for Chemical Communications  
This journal is (c) The Royal Society of Chemistry 2008

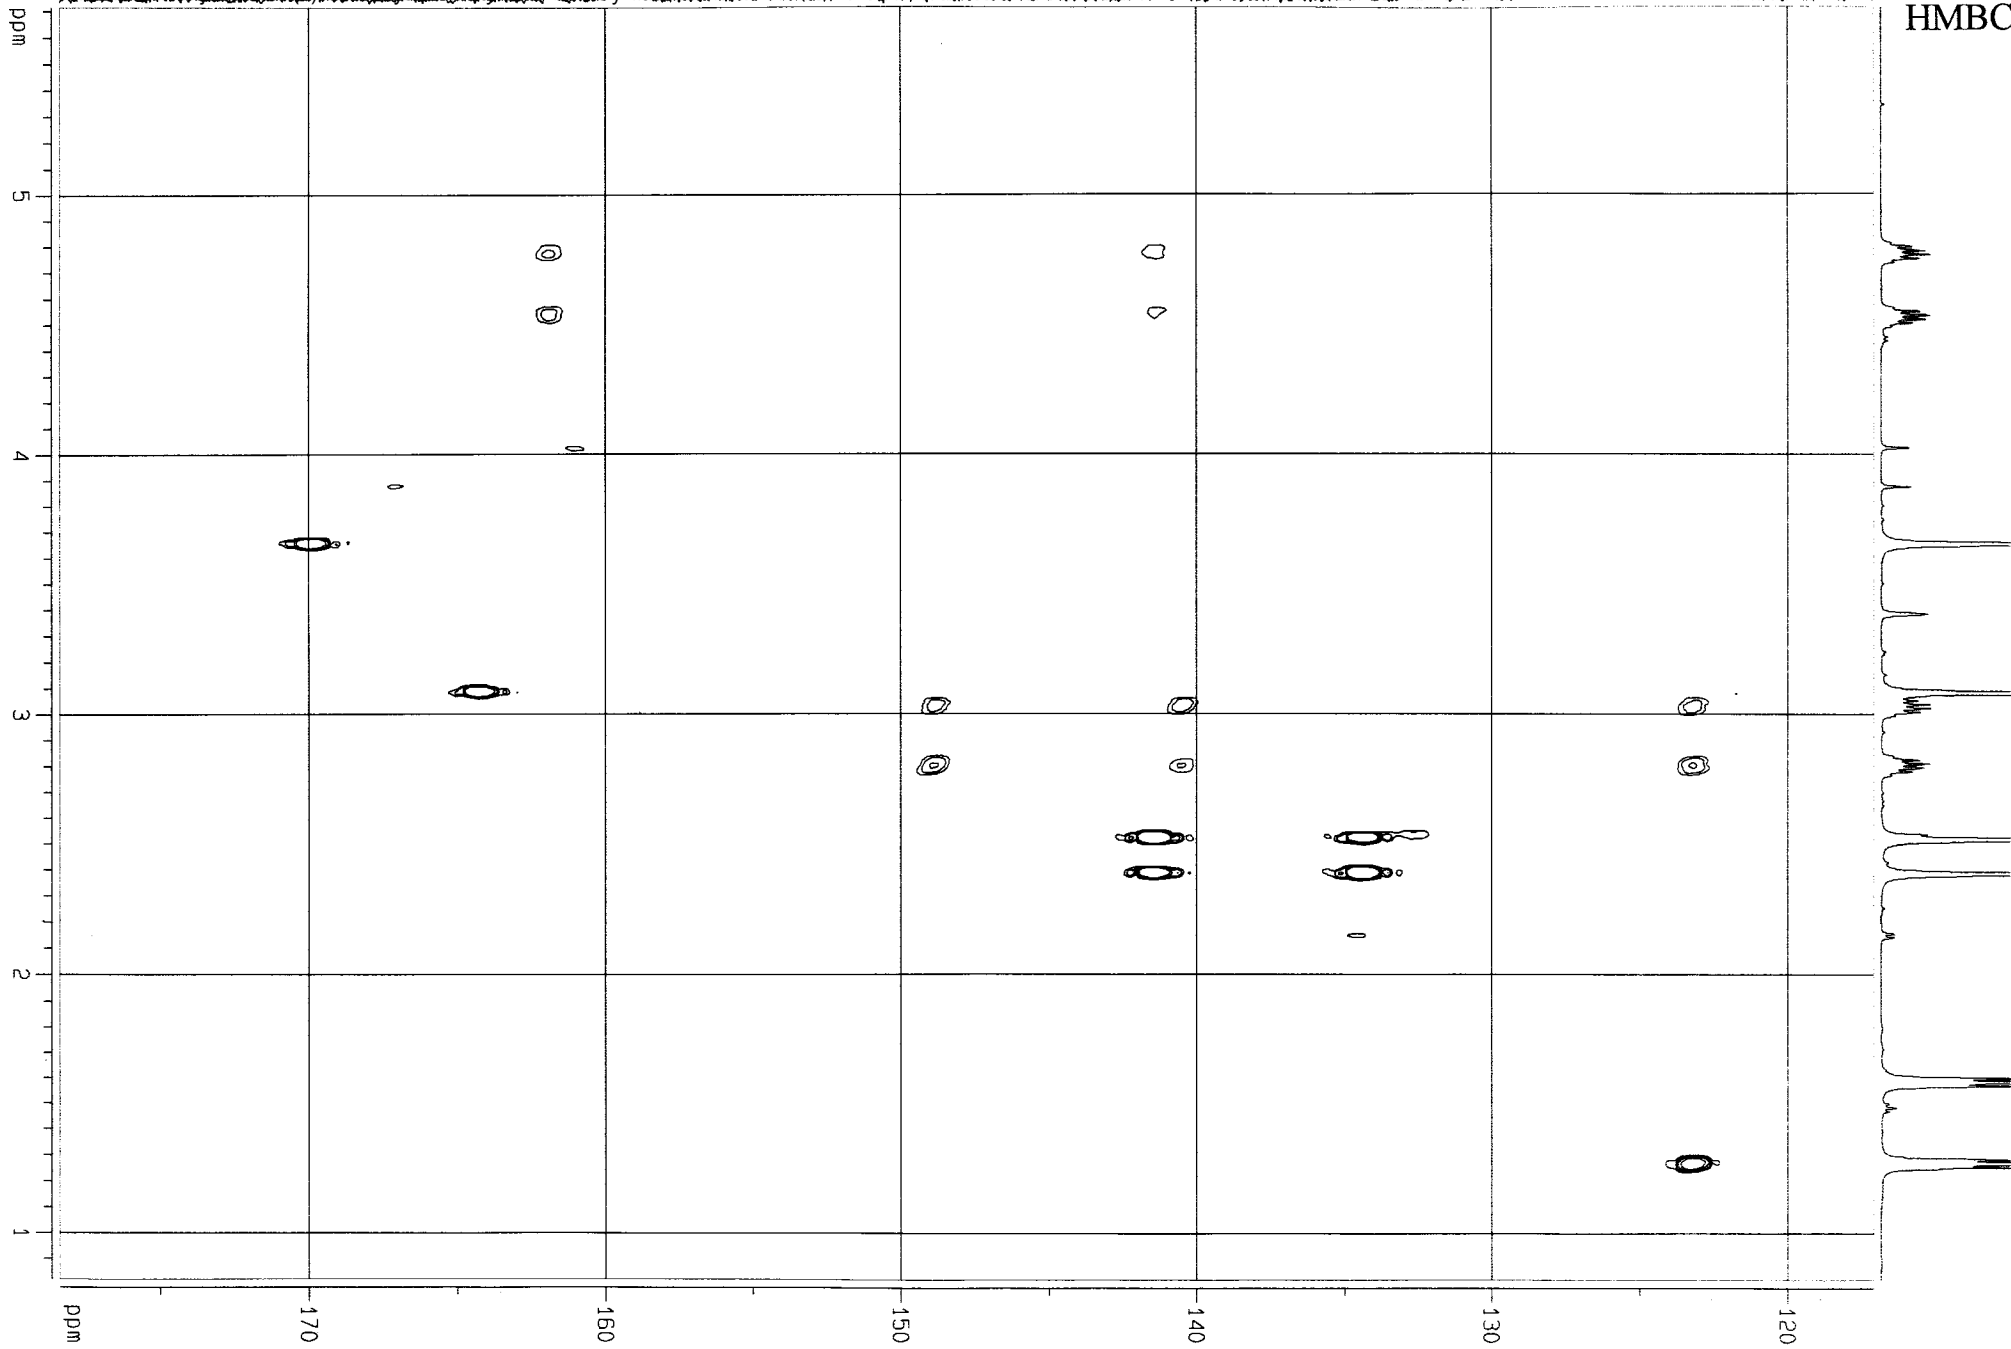

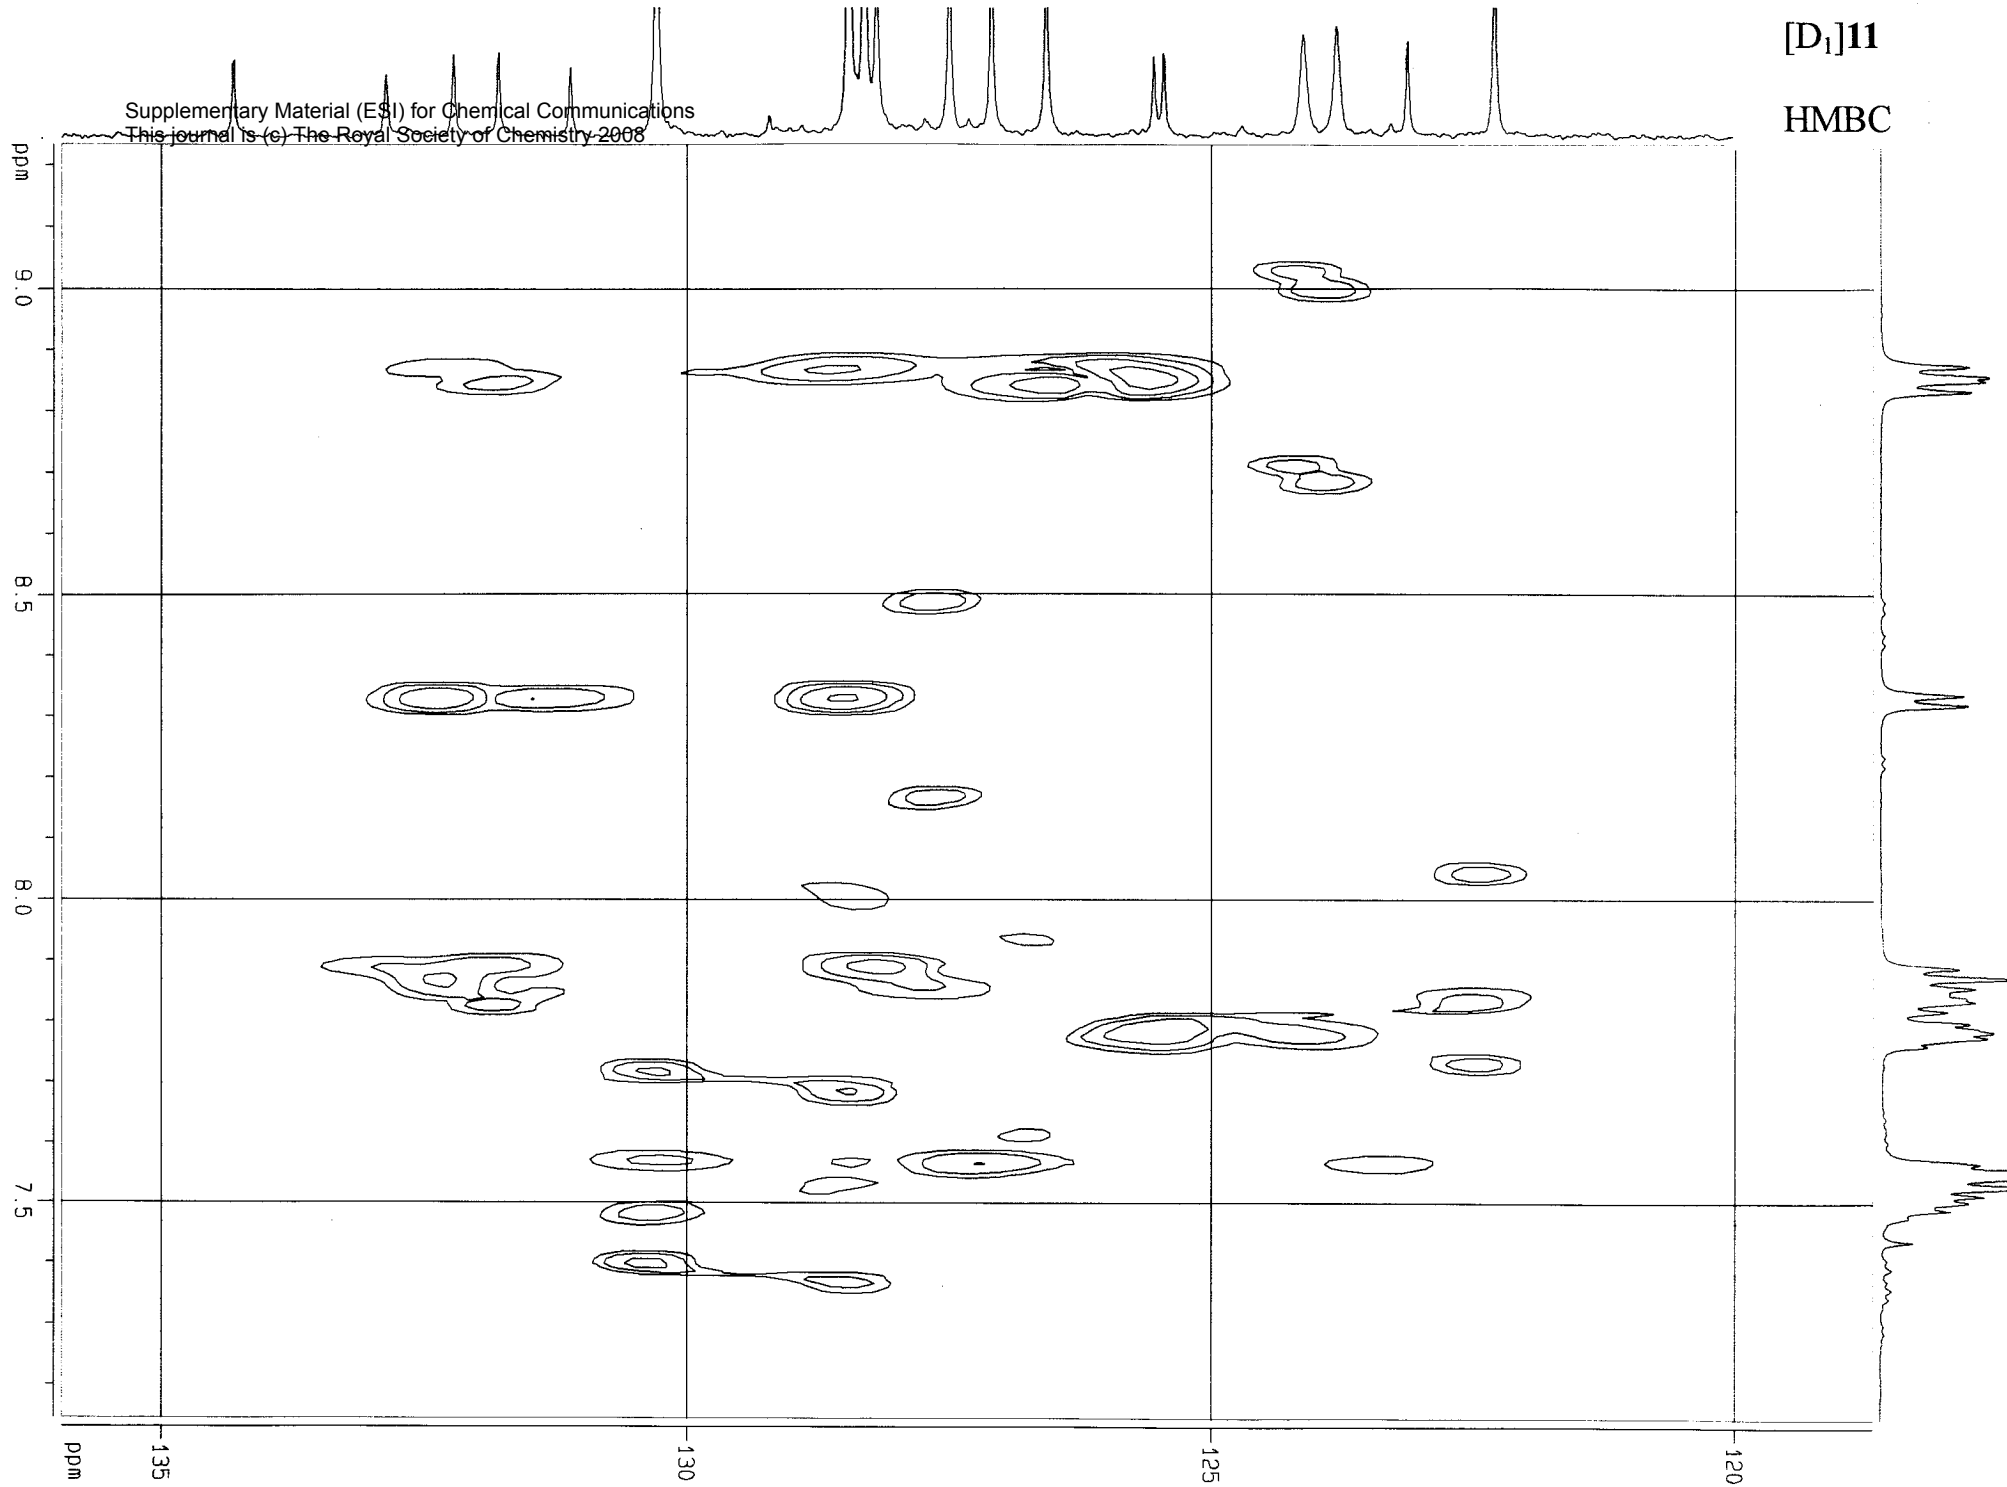

[D<sub>1</sub>]11

HMQC

Supplementary Material (ESI) for Chemical Communications  
This journal is (c) The Royal Society of Chemistry 2008

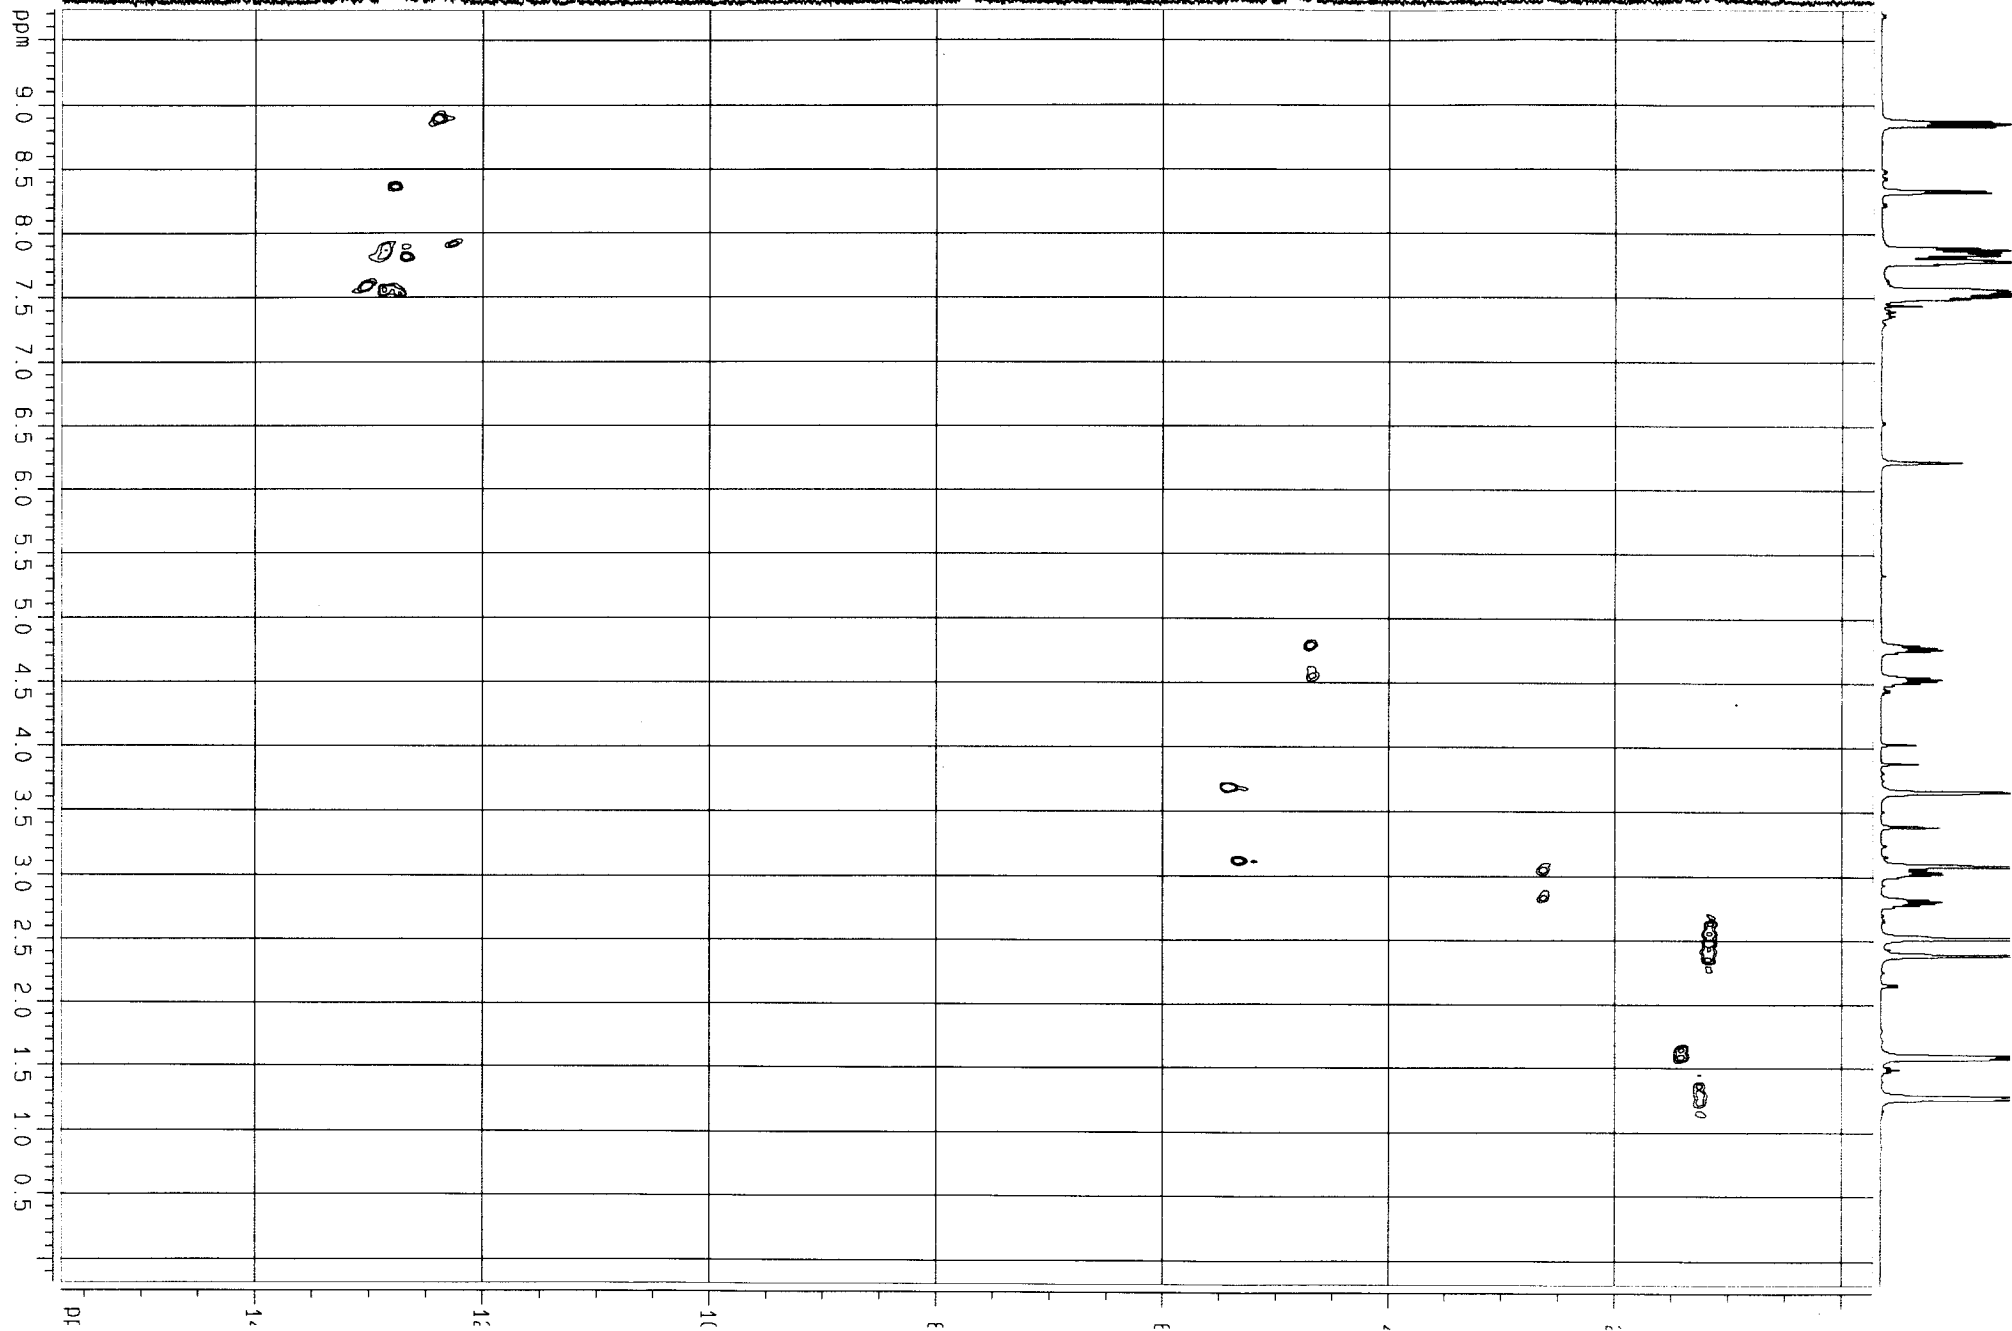



[D<sub>1</sub>]11

HMQC

Supplementary Material (ESI) for Chemical Communications  
This journal is (c) The Royal Society of Chemistry 2008

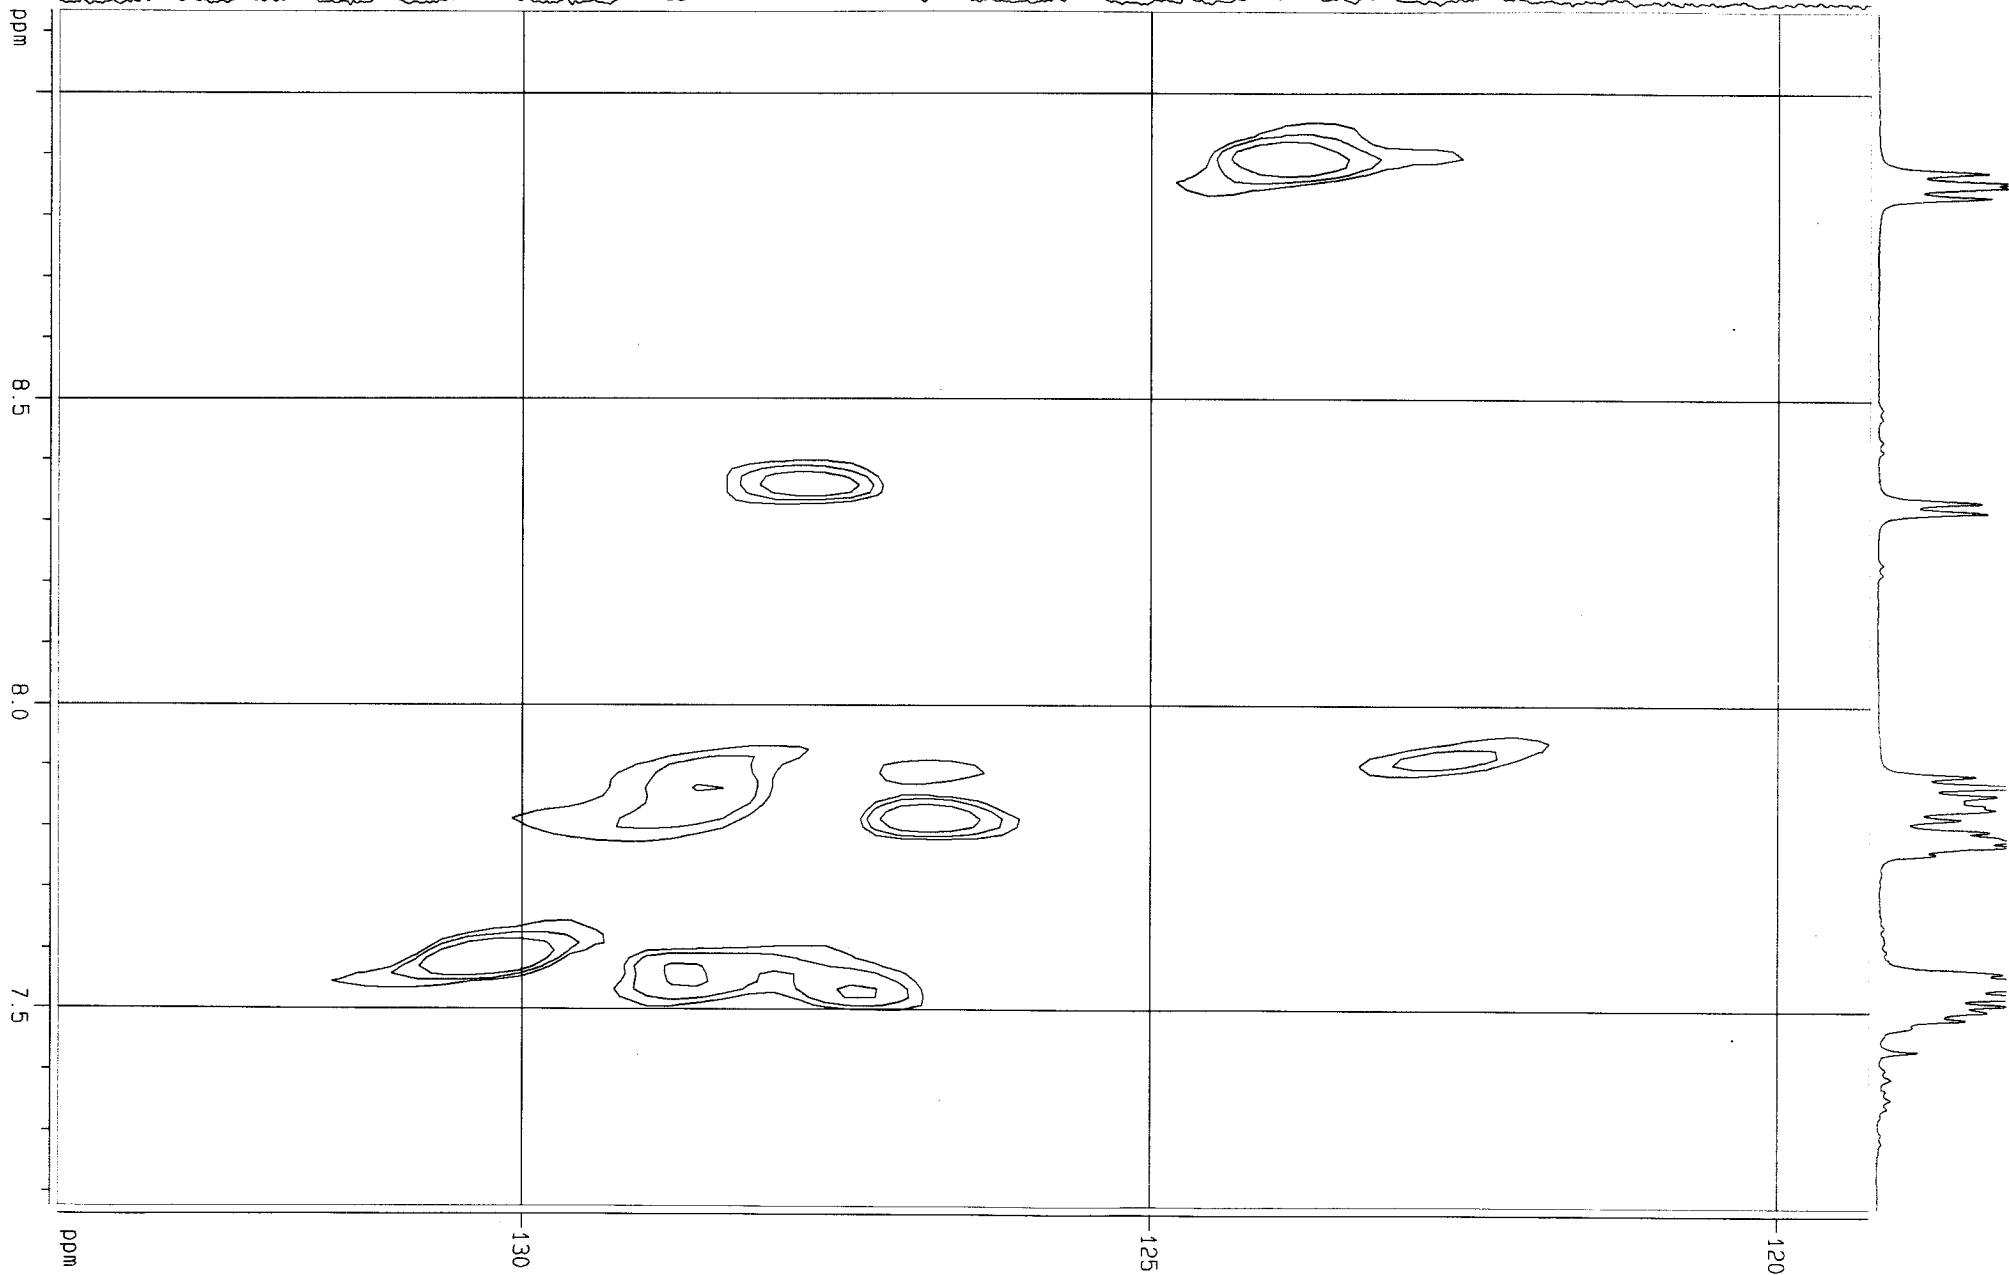

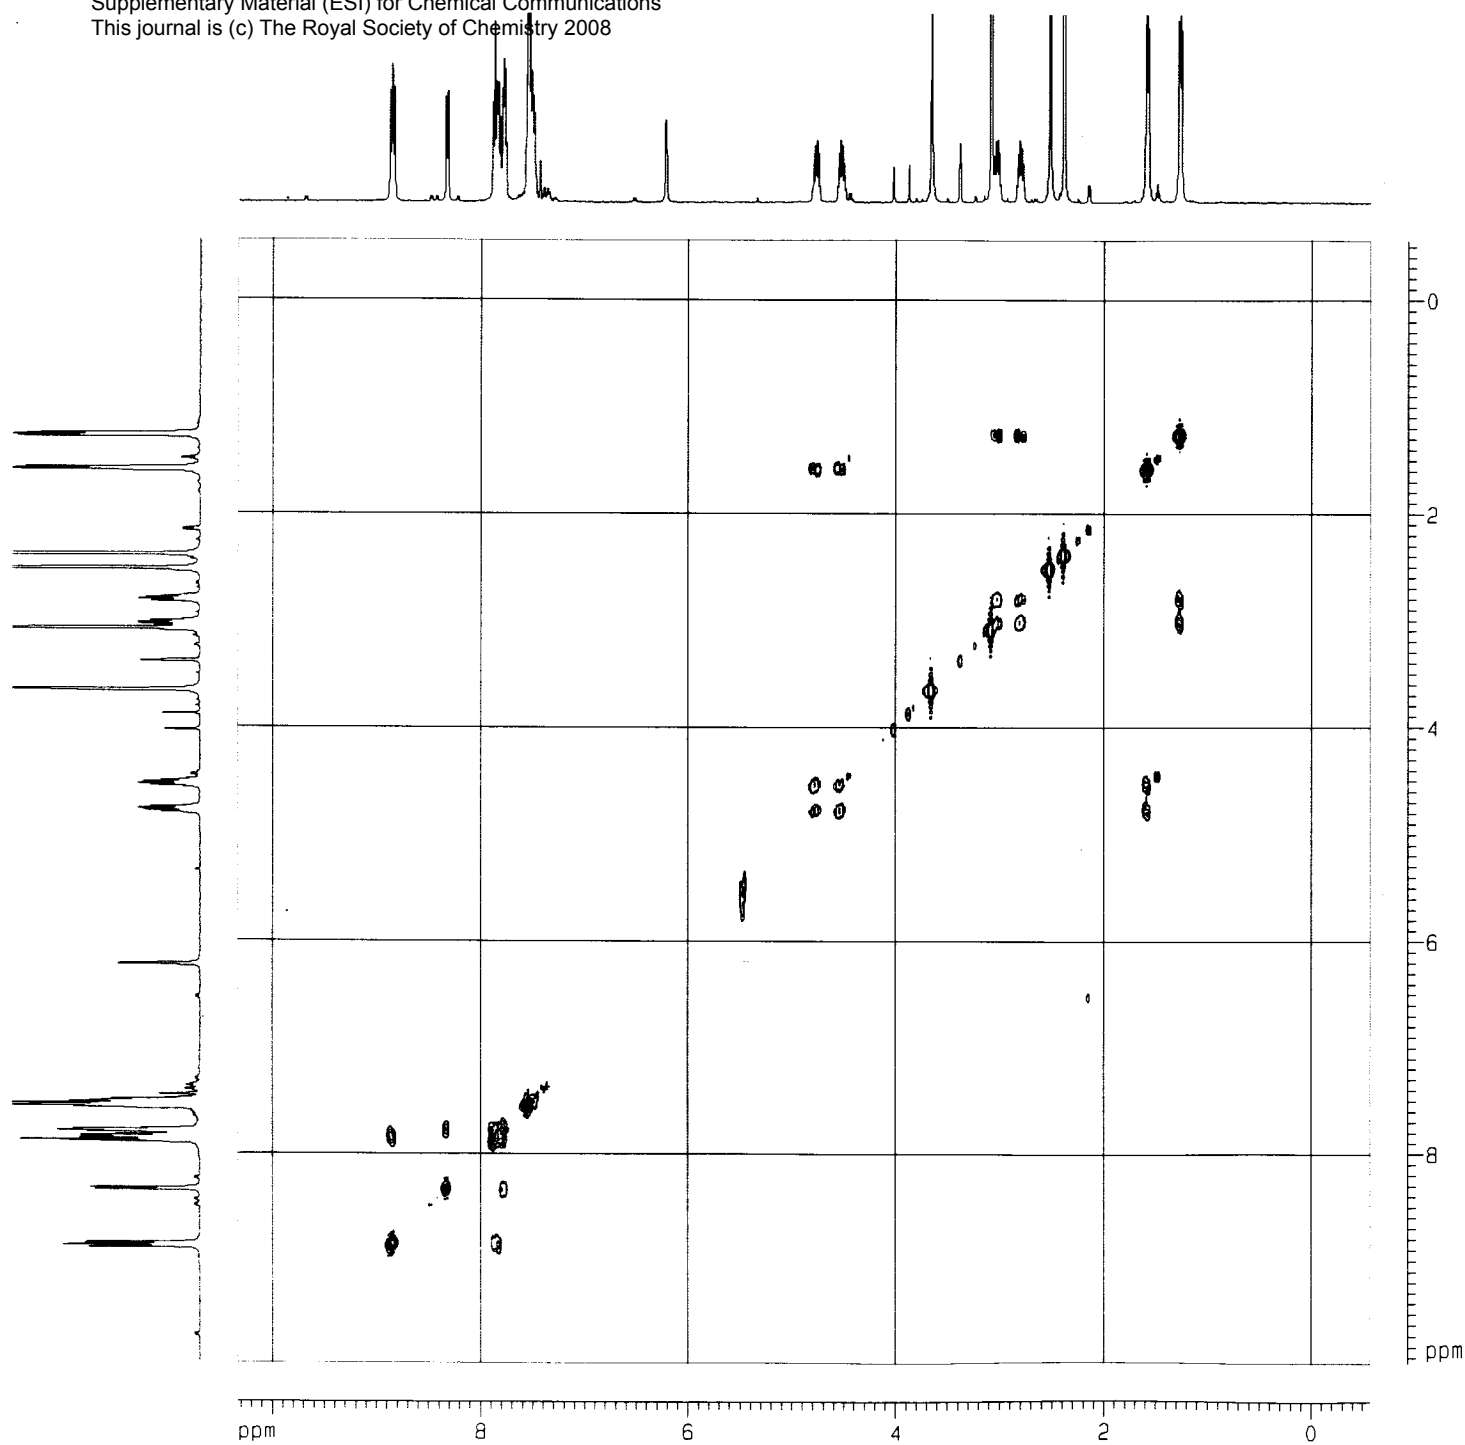

```

Current Data Parameters
NAME      ne2007-2
EXPNO    492
PROCNO    1

F2 - Acquisition Parameters
Date_    20070223
Time     14.51
INSTRUM  dm500
PROBHD   5 mm QNP 1H/1
PULPROG  cosyqqqf
TD       2048
SOLVENT  CDCl3
NS       8
DS       8
SWH      6510.417 Hz
FIDRES   3.178914 Hz
AQ       0.1574132 sec
RG       128
DM       76.800 usec
DE       6.00 usec
TE       299.0 K
d0       0.0000300 sec
d1       1.48689198 sec
d13      0.0000400 sec
d16      0.00020000 sec
DRO      0.00015380 sec
NCREST   0.0000000 sec
MCWK     1.48689198 sec

***** CHANNEL f1 *****
NUC1     1H
P0       8.70 usec
P1       8.70 usec
PL1      4.00 dB
SFO1     500.1340460 MHz

***** GRADIENT CHANNEL *****
GPNAM1   SINE.100
GPNAM2   SINE.100
GPX1     0.00 %
GPX2     0.00 %
GPY1     0.00 %
GPY2     0.00 %
GPZ1     10.00 %
GPZ2     10.00 %
P16      1000.00 usec

F1 - Acquisition parameters
NO      1
TD      128
SFO1    500.134 MHz
FIDRES  50.796490 Hz
SM      13.000 ppm
FMODE   OF

F2 - Processing parameters
SI      3274
SF      500.1319480 MHz
WDW     SINE
SSB     0
LB      0.00 Hz
GB      0
PC      1.40

F1 - Processing parameters
SI      2048
MC2     OF
SF      500.1319485 MHz
WDW     SINE
SSB     0
LB      0.00 Hz
GB      0

2D NMR plot parameters
CX2     15.00 cm
CX1     15.00 cm
F2PL0   5180.00 Hz
F2L0    -0.5172 ppm
F2PHI   -285.17 Hz
F1PL0   9.951 ppm
F1L0    4977.02 Hz
F1PHI   -0.561 ppm
F1HI    -280.42 Hz
F2PPMCM 0.72714 ppm/cm
F2HZCM  363.66821 Hz/cm
F1PPMCM 0.70081 ppm/cm
F1HZCM  350.49515 Hz/cm

```

[D<sub>1</sub>]**11**

NOESY

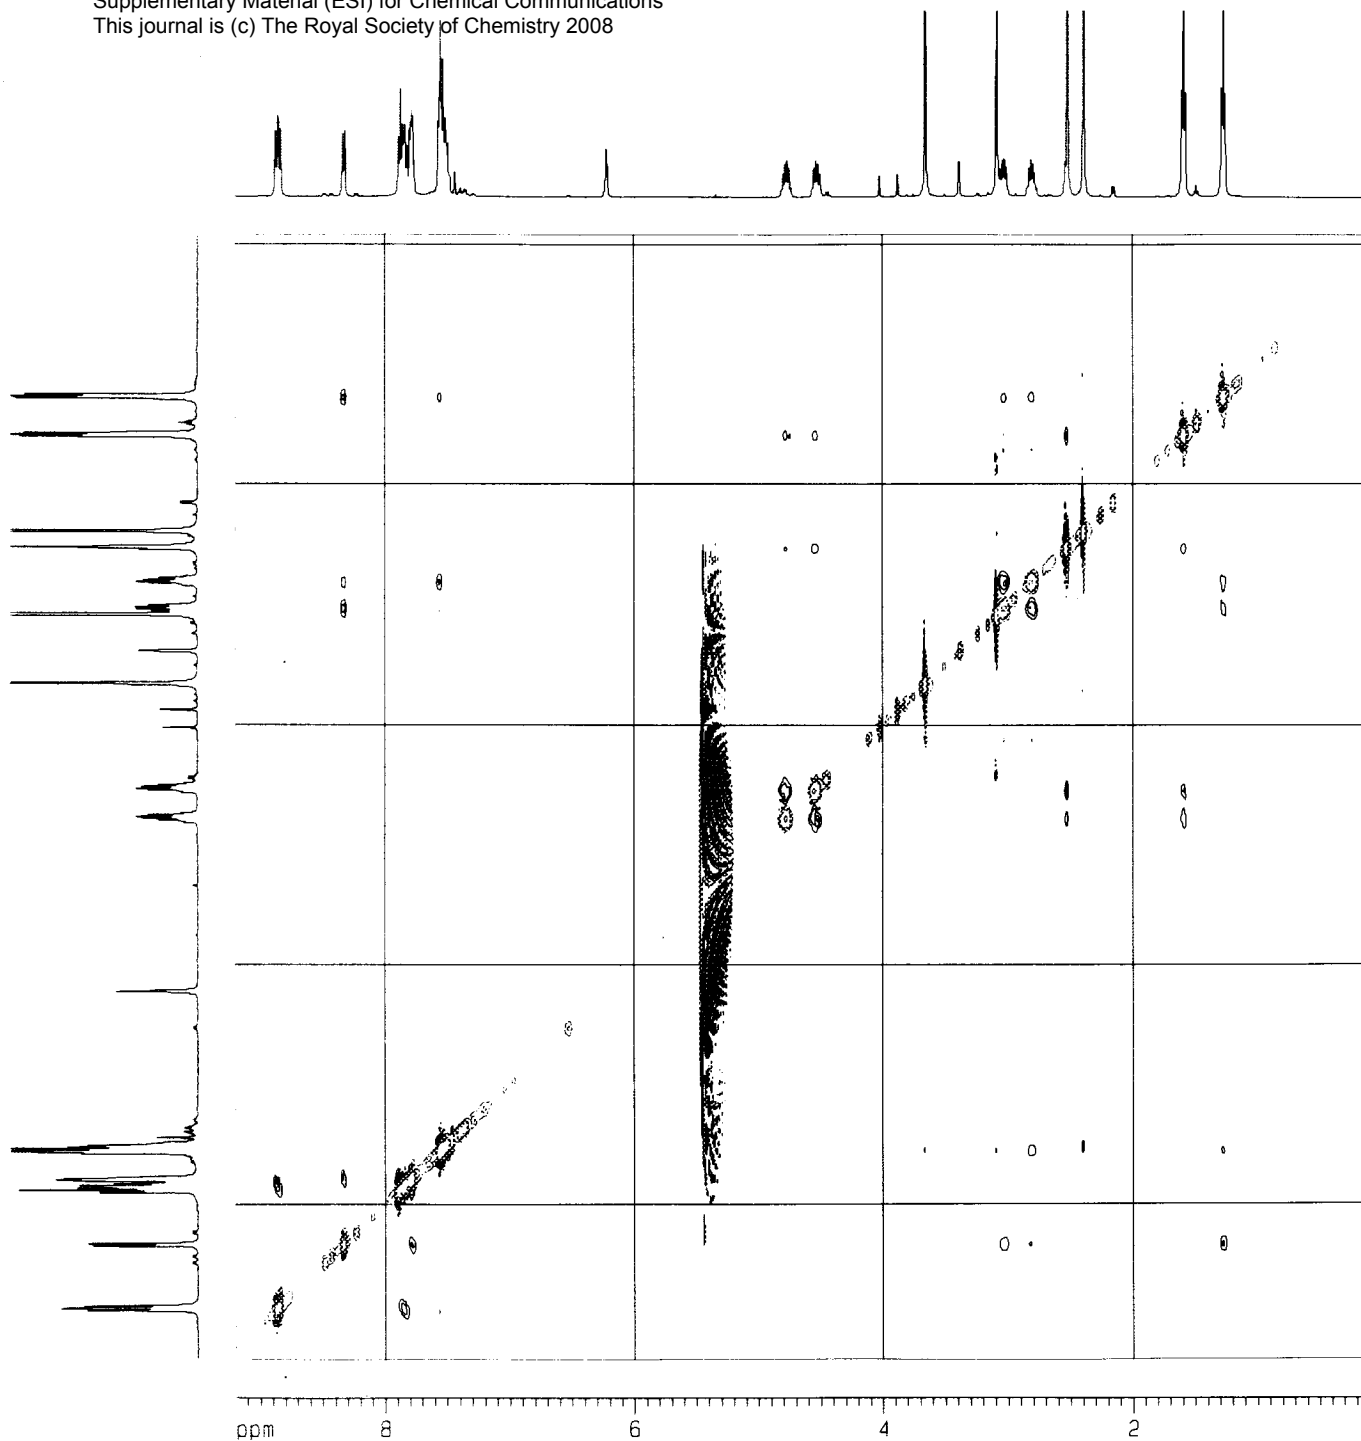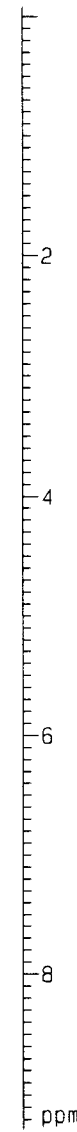

Current Data Parameters  
 NAME ne2007-2  
 EXPNO 493  
 PROCNO 1

F2 - Acquisition Parameters  
 Date\_ 20070923  
 Time 15 20  
 INSTRUM dmw500  
 PROBNM 5 mm QNP 1H/15  
 PULPROG noesyph  
 TO 2048  
 SOLVENT CDCl3  
 NS 32  
 DS 4  
 SWH 5482.456 Hz  
 FIDRES 2.676980 Hz  
 AQ 0.1869188 sec  
 RG 16  
 DW 91.200 usec  
 DE 8.00 usec  
 TE 298.7 K  
 D0 0.0007891 sec  
 D1 1.50000000 sec  
 DB 0.60000002 sec  
 IN0 0.0018178 sec  
 MCREST 0.00000000 sec  
 MCMK 0.75000000 sec  
 ST1CNF 128

----- CHANNEL f1 -----  
 NUC1 1H  
 P1 8.70 usec  
 PL1 4.00 dB  
 SFG1 500.1338920 MHz

F1 - Acquisition parameters  
 NDO 1  
 TO 256  
 SFO1 500.1339 MHz  
 FIDRES 21.489479 Hz  
 SW 11.000 ppm  
 FMODE States-TPPI

F2 - Processing parameters  
 SI 1024  
 SF 500.1319469 MHz  
 MDM QSINE  
 SSB 2  
 LB 0.00 Hz  
 GB 0  
 PC 1.00

F1 - Processing parameters  
 SI 1024  
 MC2 States-TPPI  
 SF 500.1319471 MHz  
 MDM QSINE  
 SSB 2  
 LB 0.00 Hz  
 GB 0

2D NMR plot parameters  
 CX2 15.00 cm  
 CX1 15.00 cm  
 F2PLO 9.199 ppm  
 F2LO 4600.68 Hz  
 F2PHI 0.121 ppm  
 F2HI 60.52 Hz  
 F1PLO 9.281 ppm  
 F1LO 4641.83 Hz  
 F1PHI -0.086 ppm  
 F1HI -42.88 Hz  
 F2PPMCH 0.60520 ppm/cm  
 F2HZCN 302.67758 Hz/cm  
 F1PPMCH 0.62446 ppm/cm  
 F1HZCN 312.31409 Hz/cm

a.i.

Supplementary Material (ESI) for Chemical Communications  
This journal is (c) The Royal Society of Chemistry 2008

2.4e+07

2.2e+07

2.0e+07

1.8e+07

1.6e+07

1.4e+07

1.2e+07

1.0e+07

8.0e+06

6.0e+06

4.0e+06

2.0e+06

[D<sub>1</sub>]**11**  
HRMS (ESI)

607.2348  
608.2384  
609.2413

PULPROG se\_curr\_pp  
TD 524288  
NS 8  
DS 0  
SW 1850751.047 ppm

590

600

610

620

630

m/z

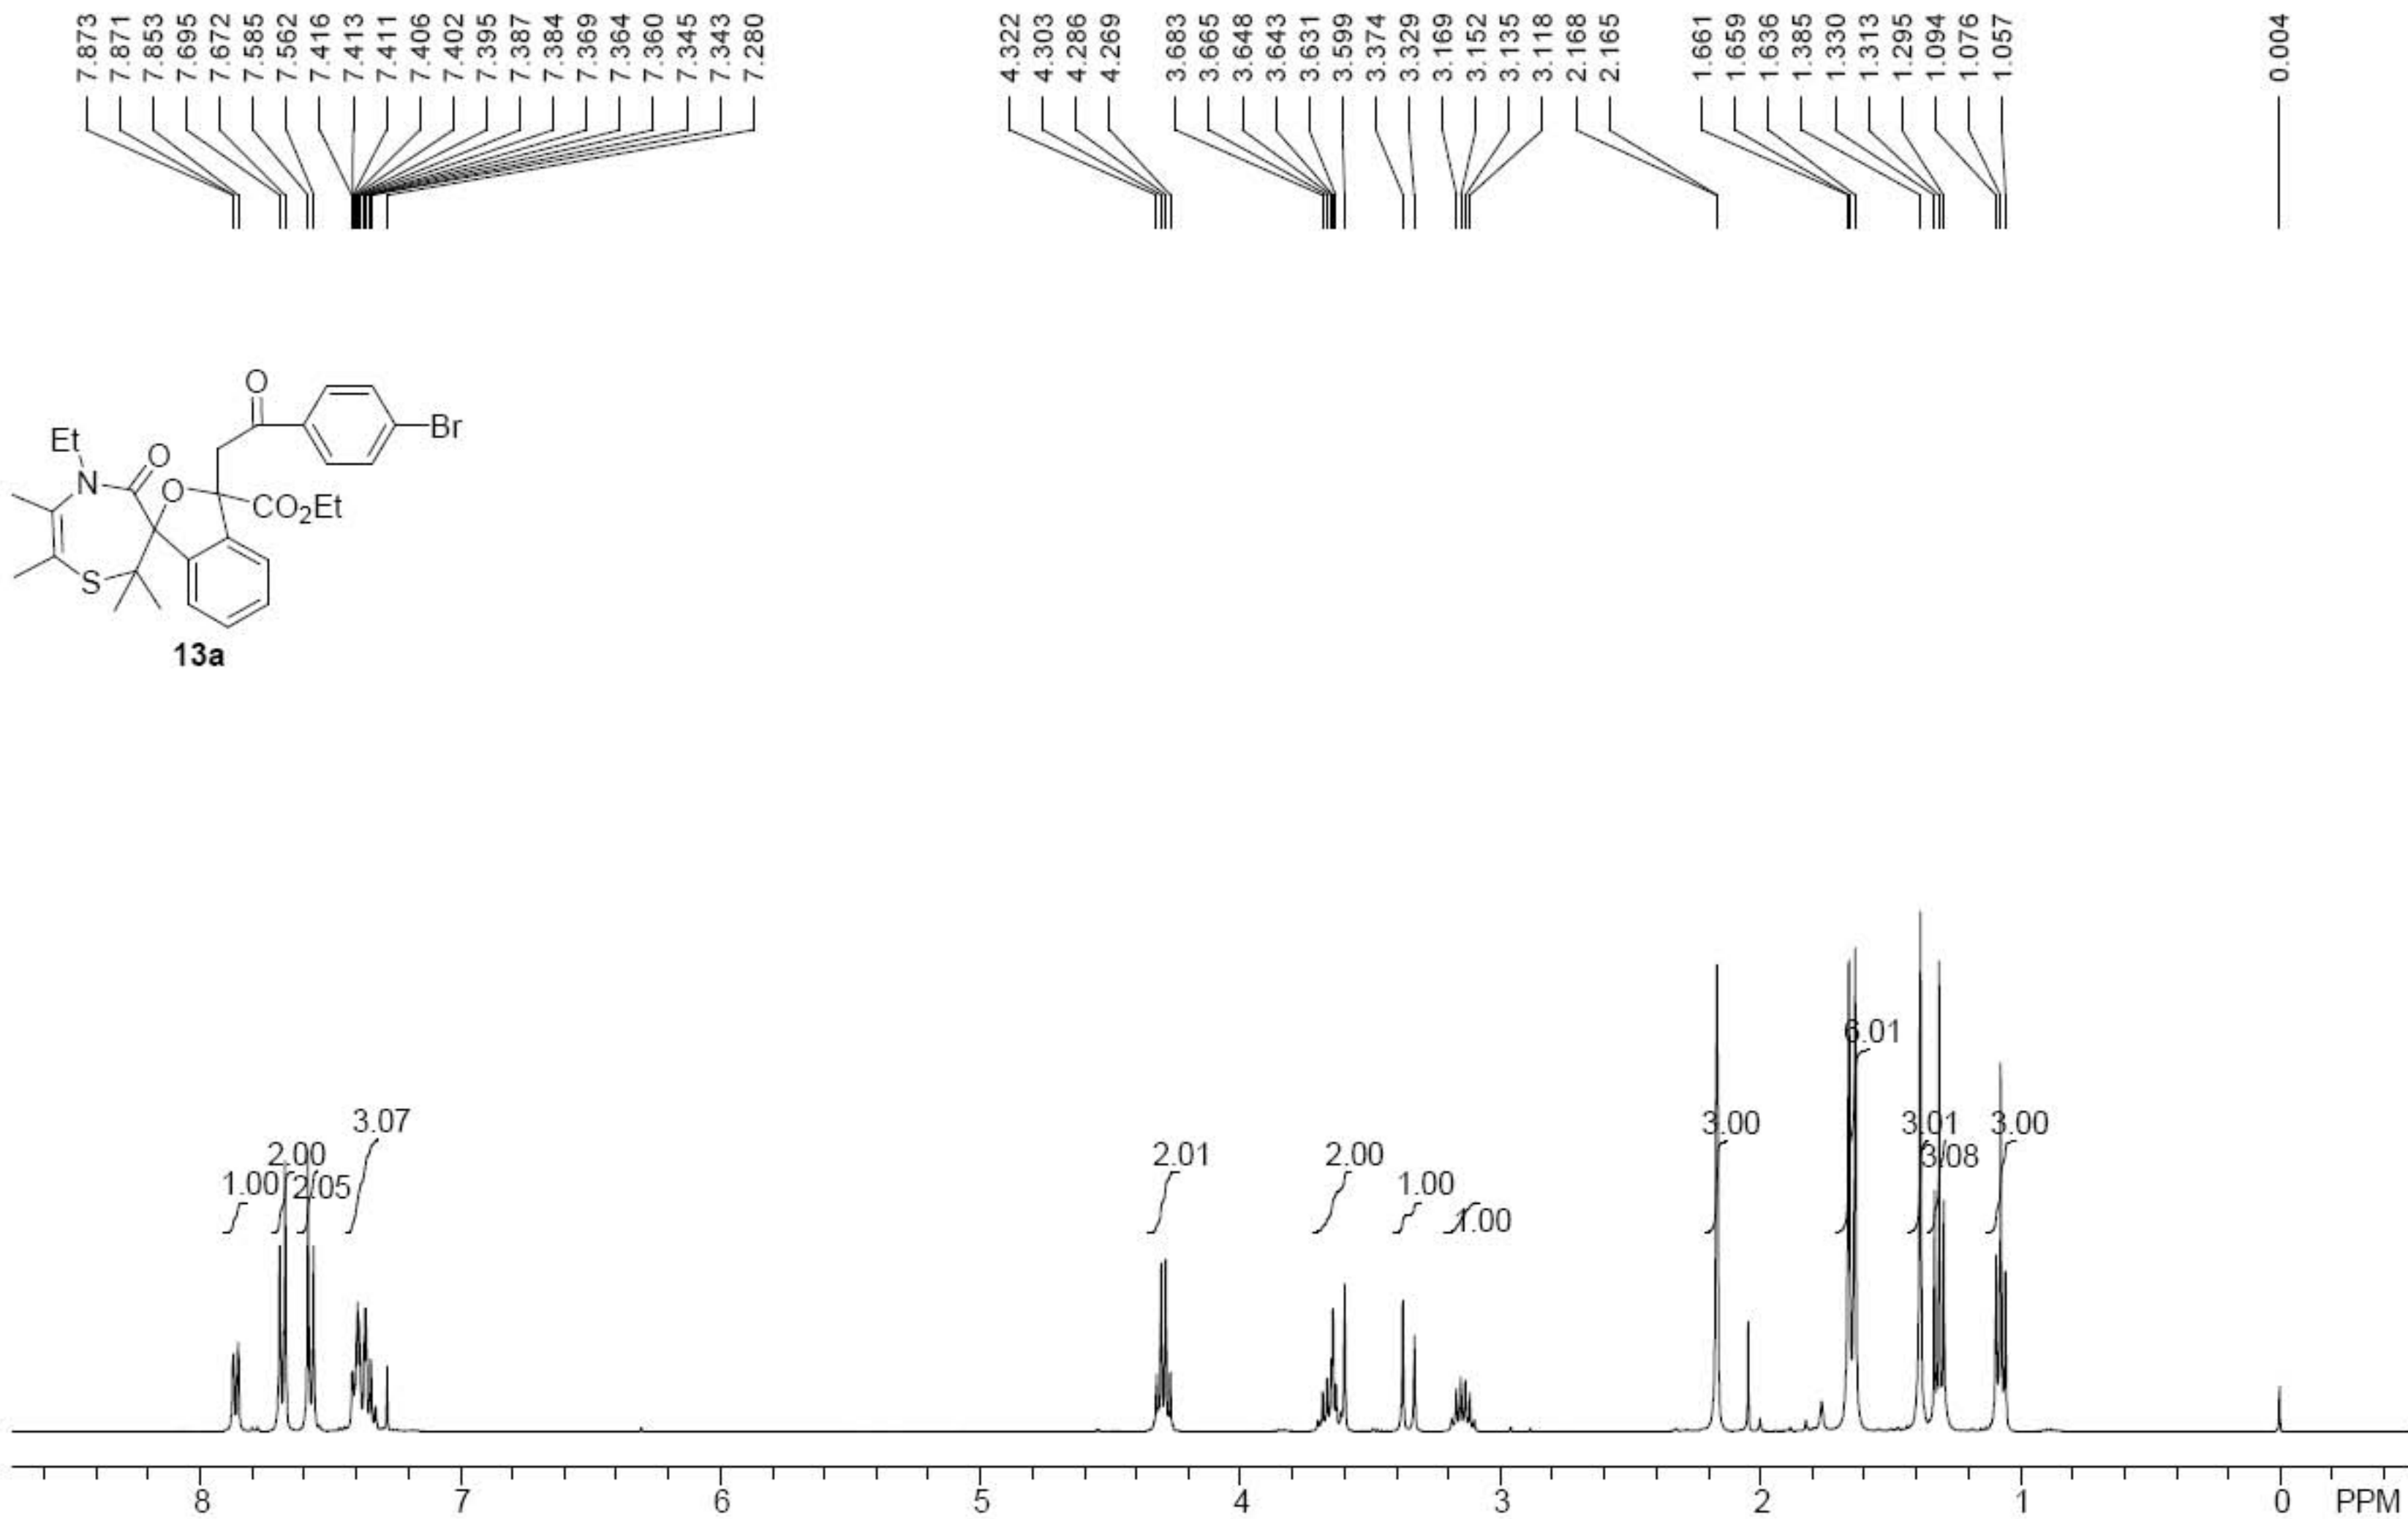

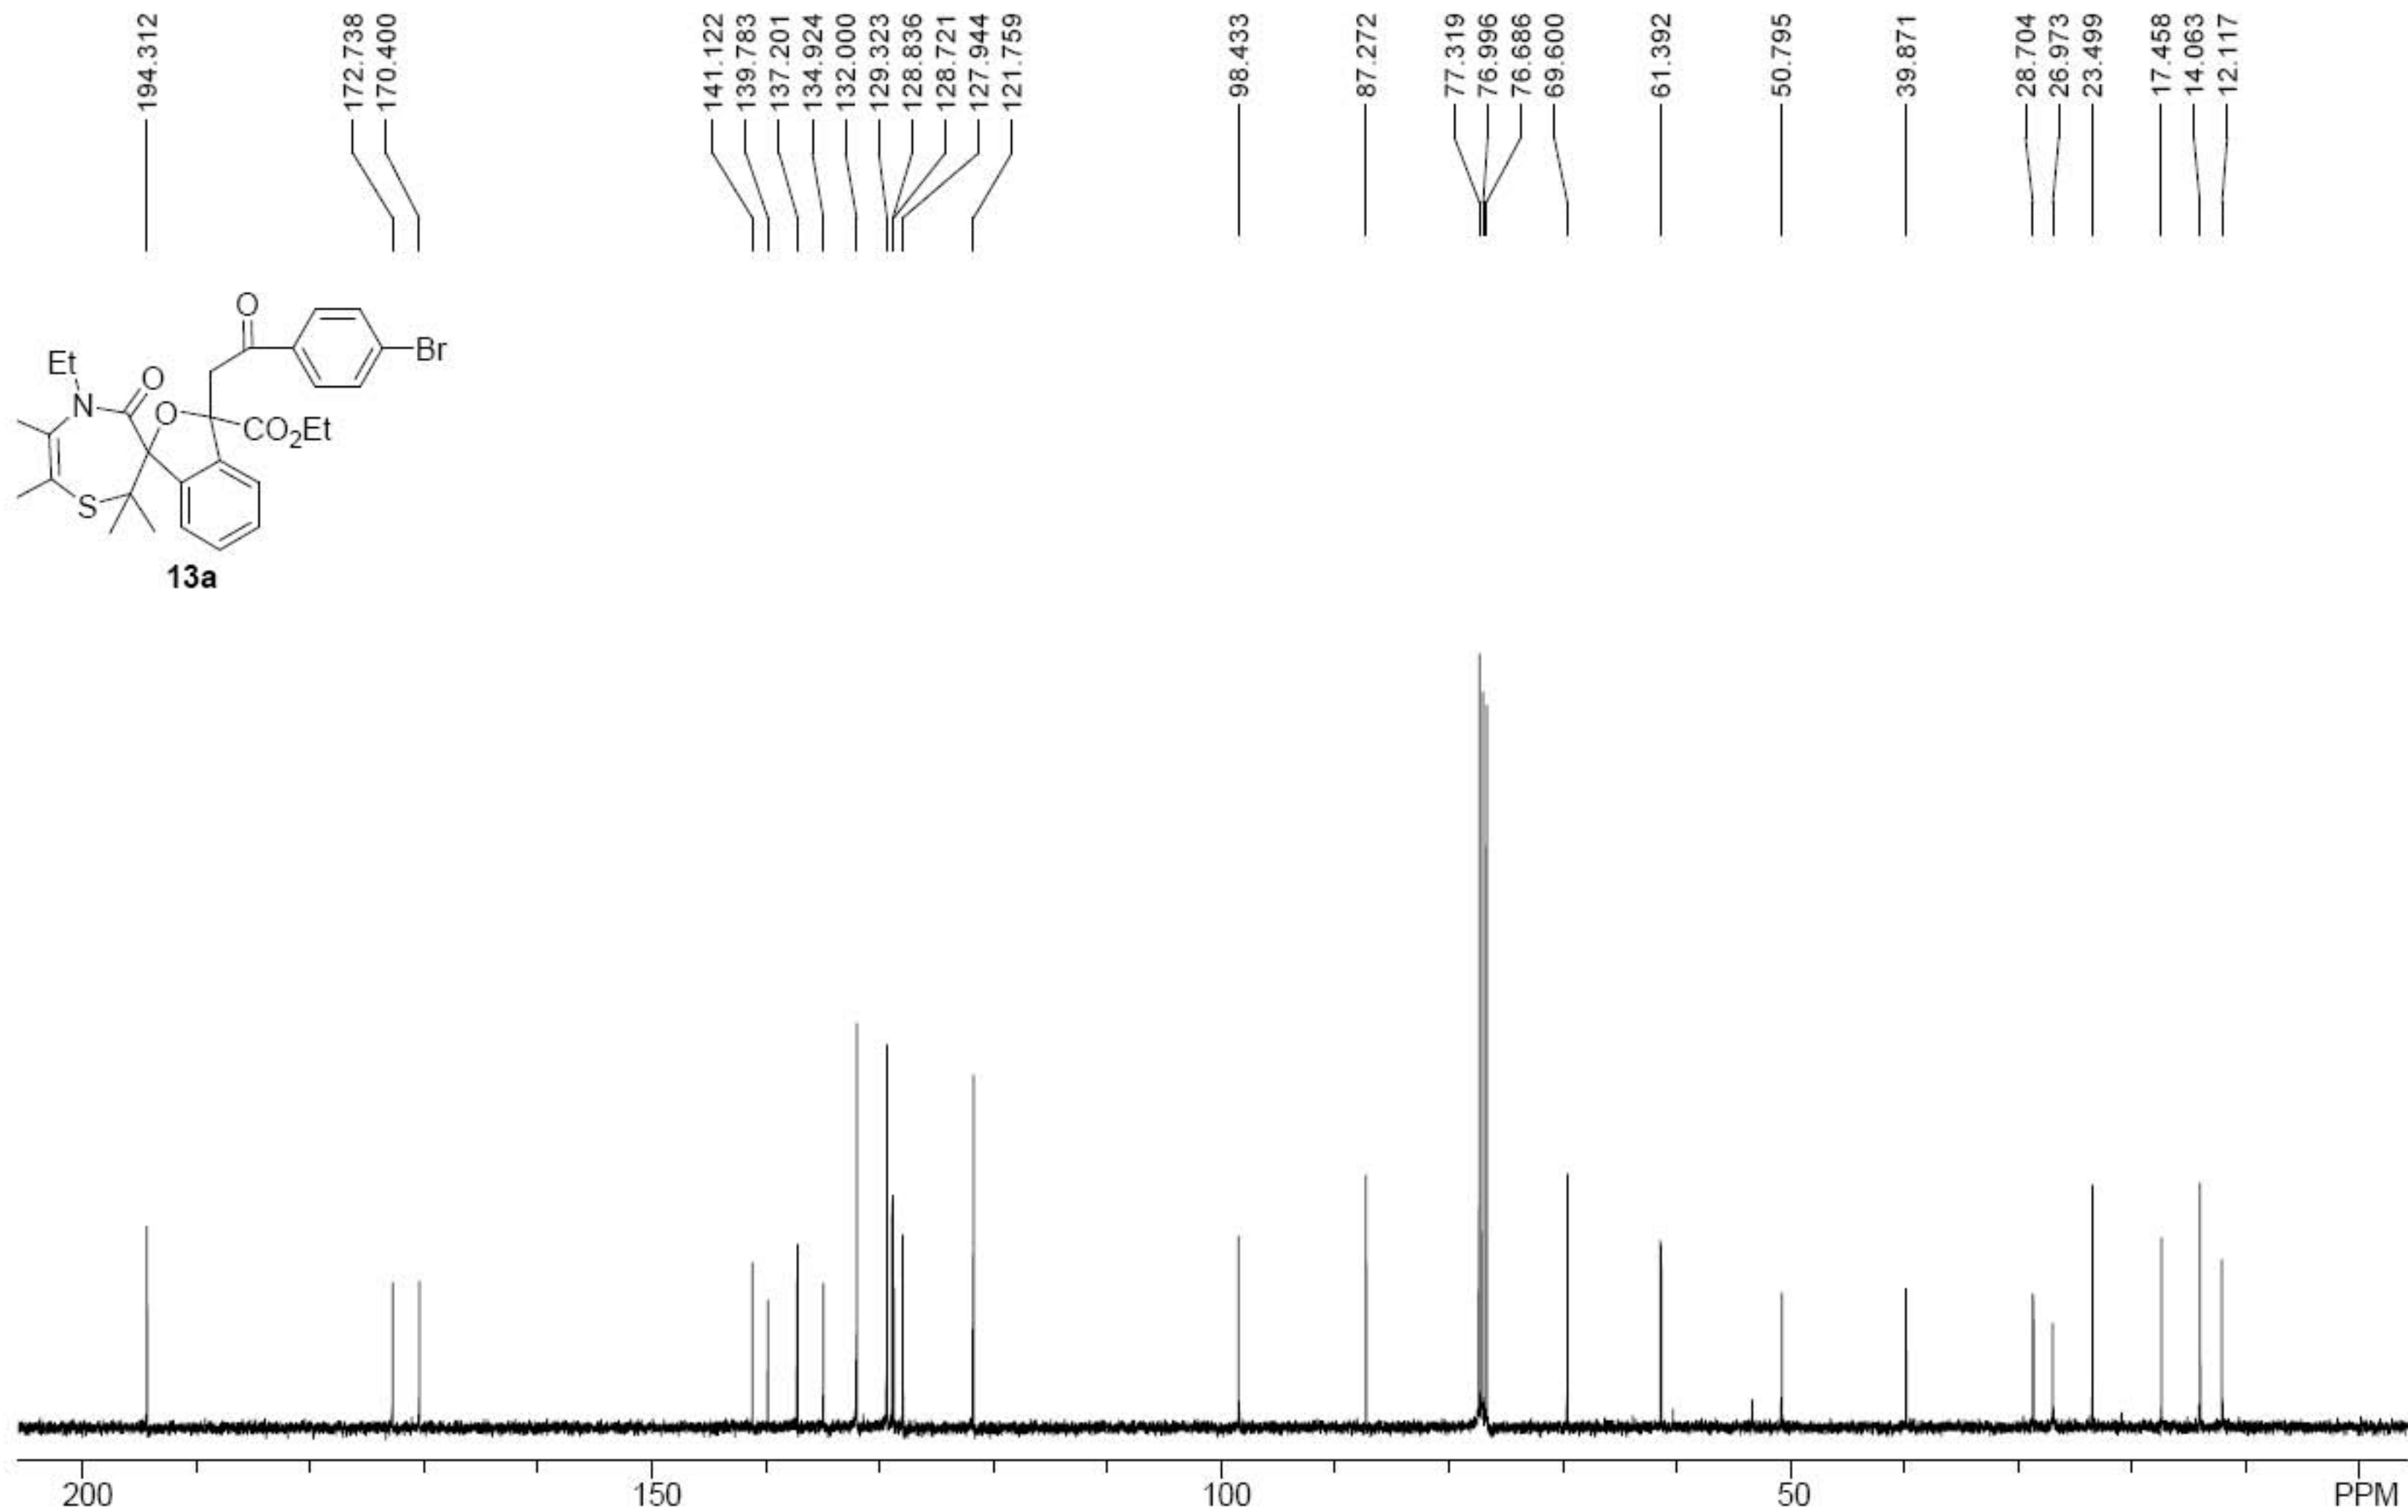

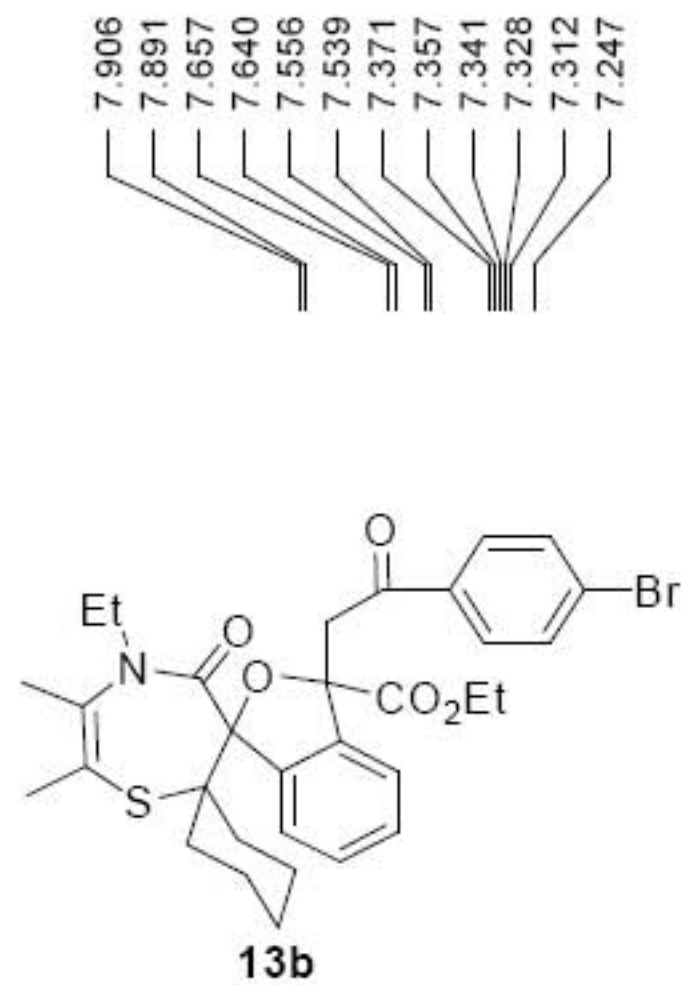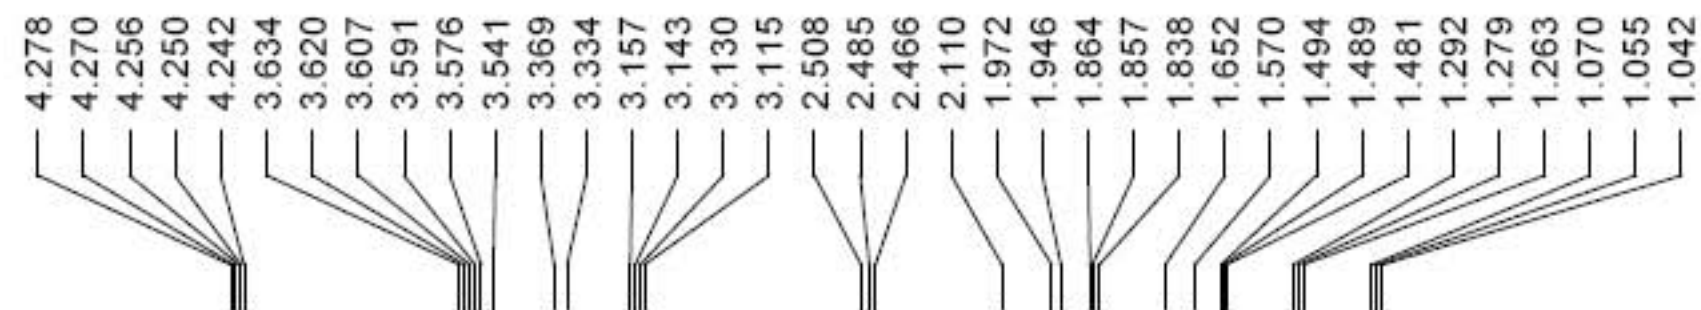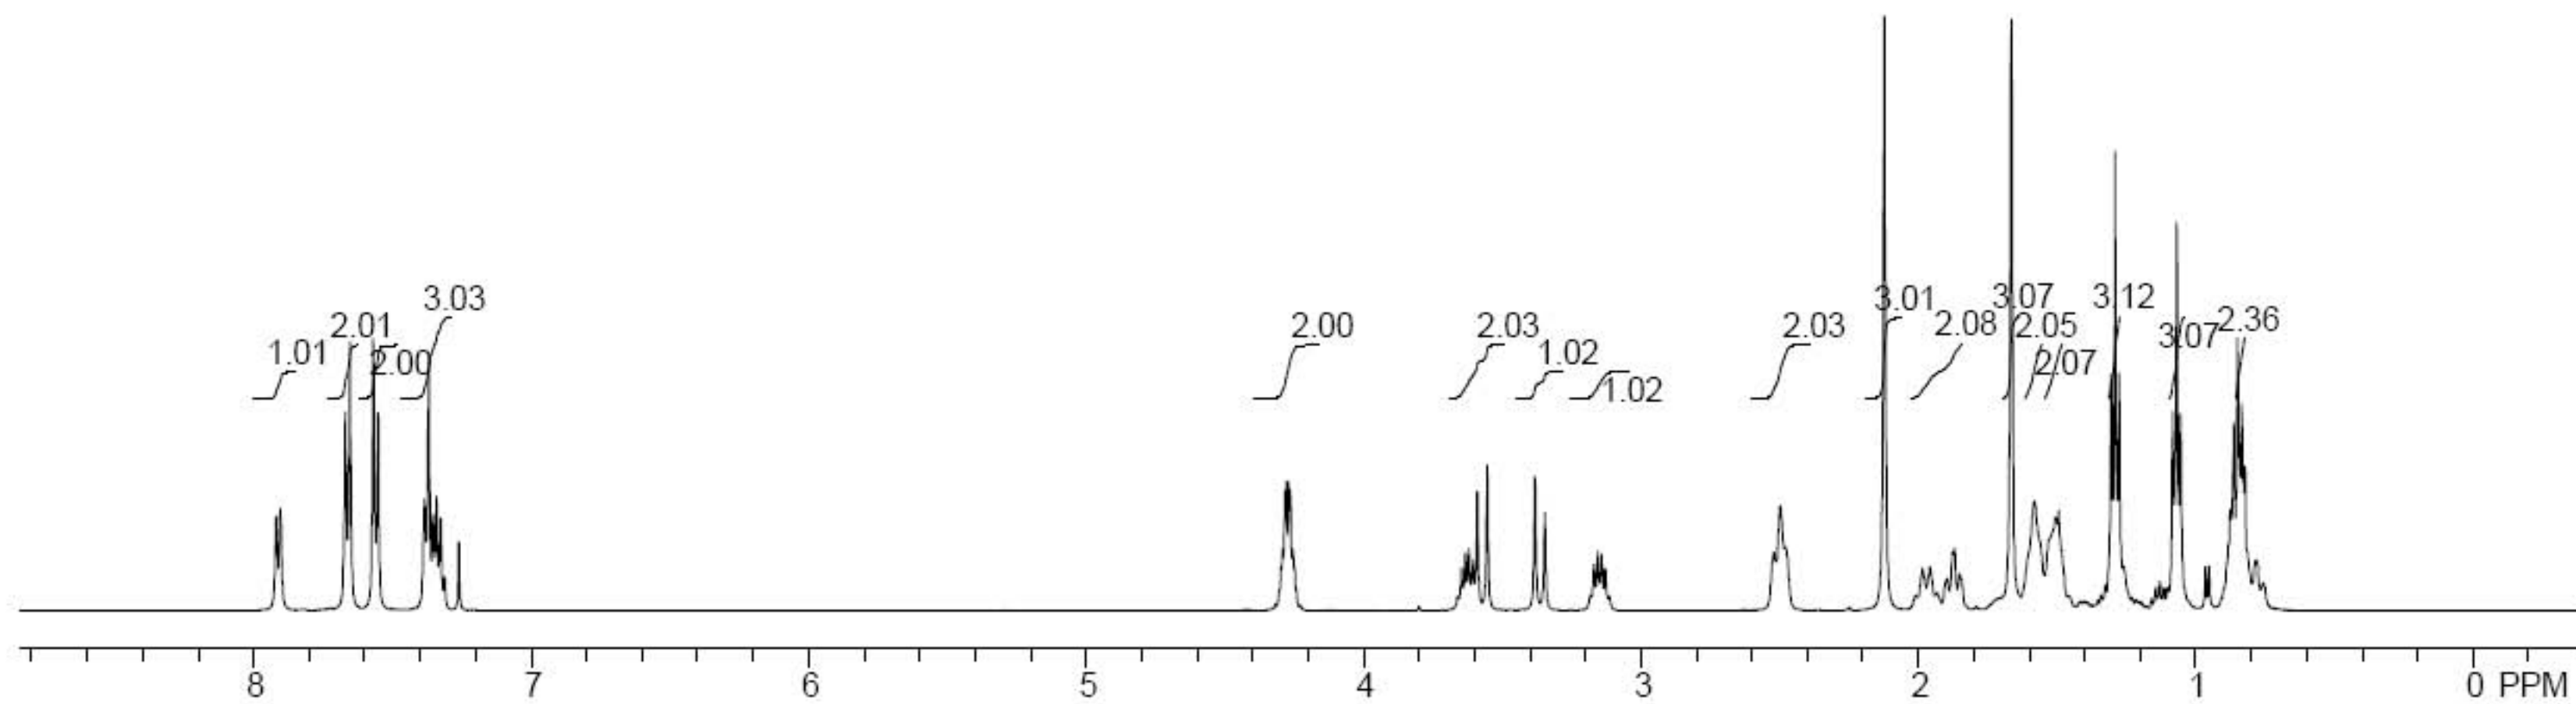

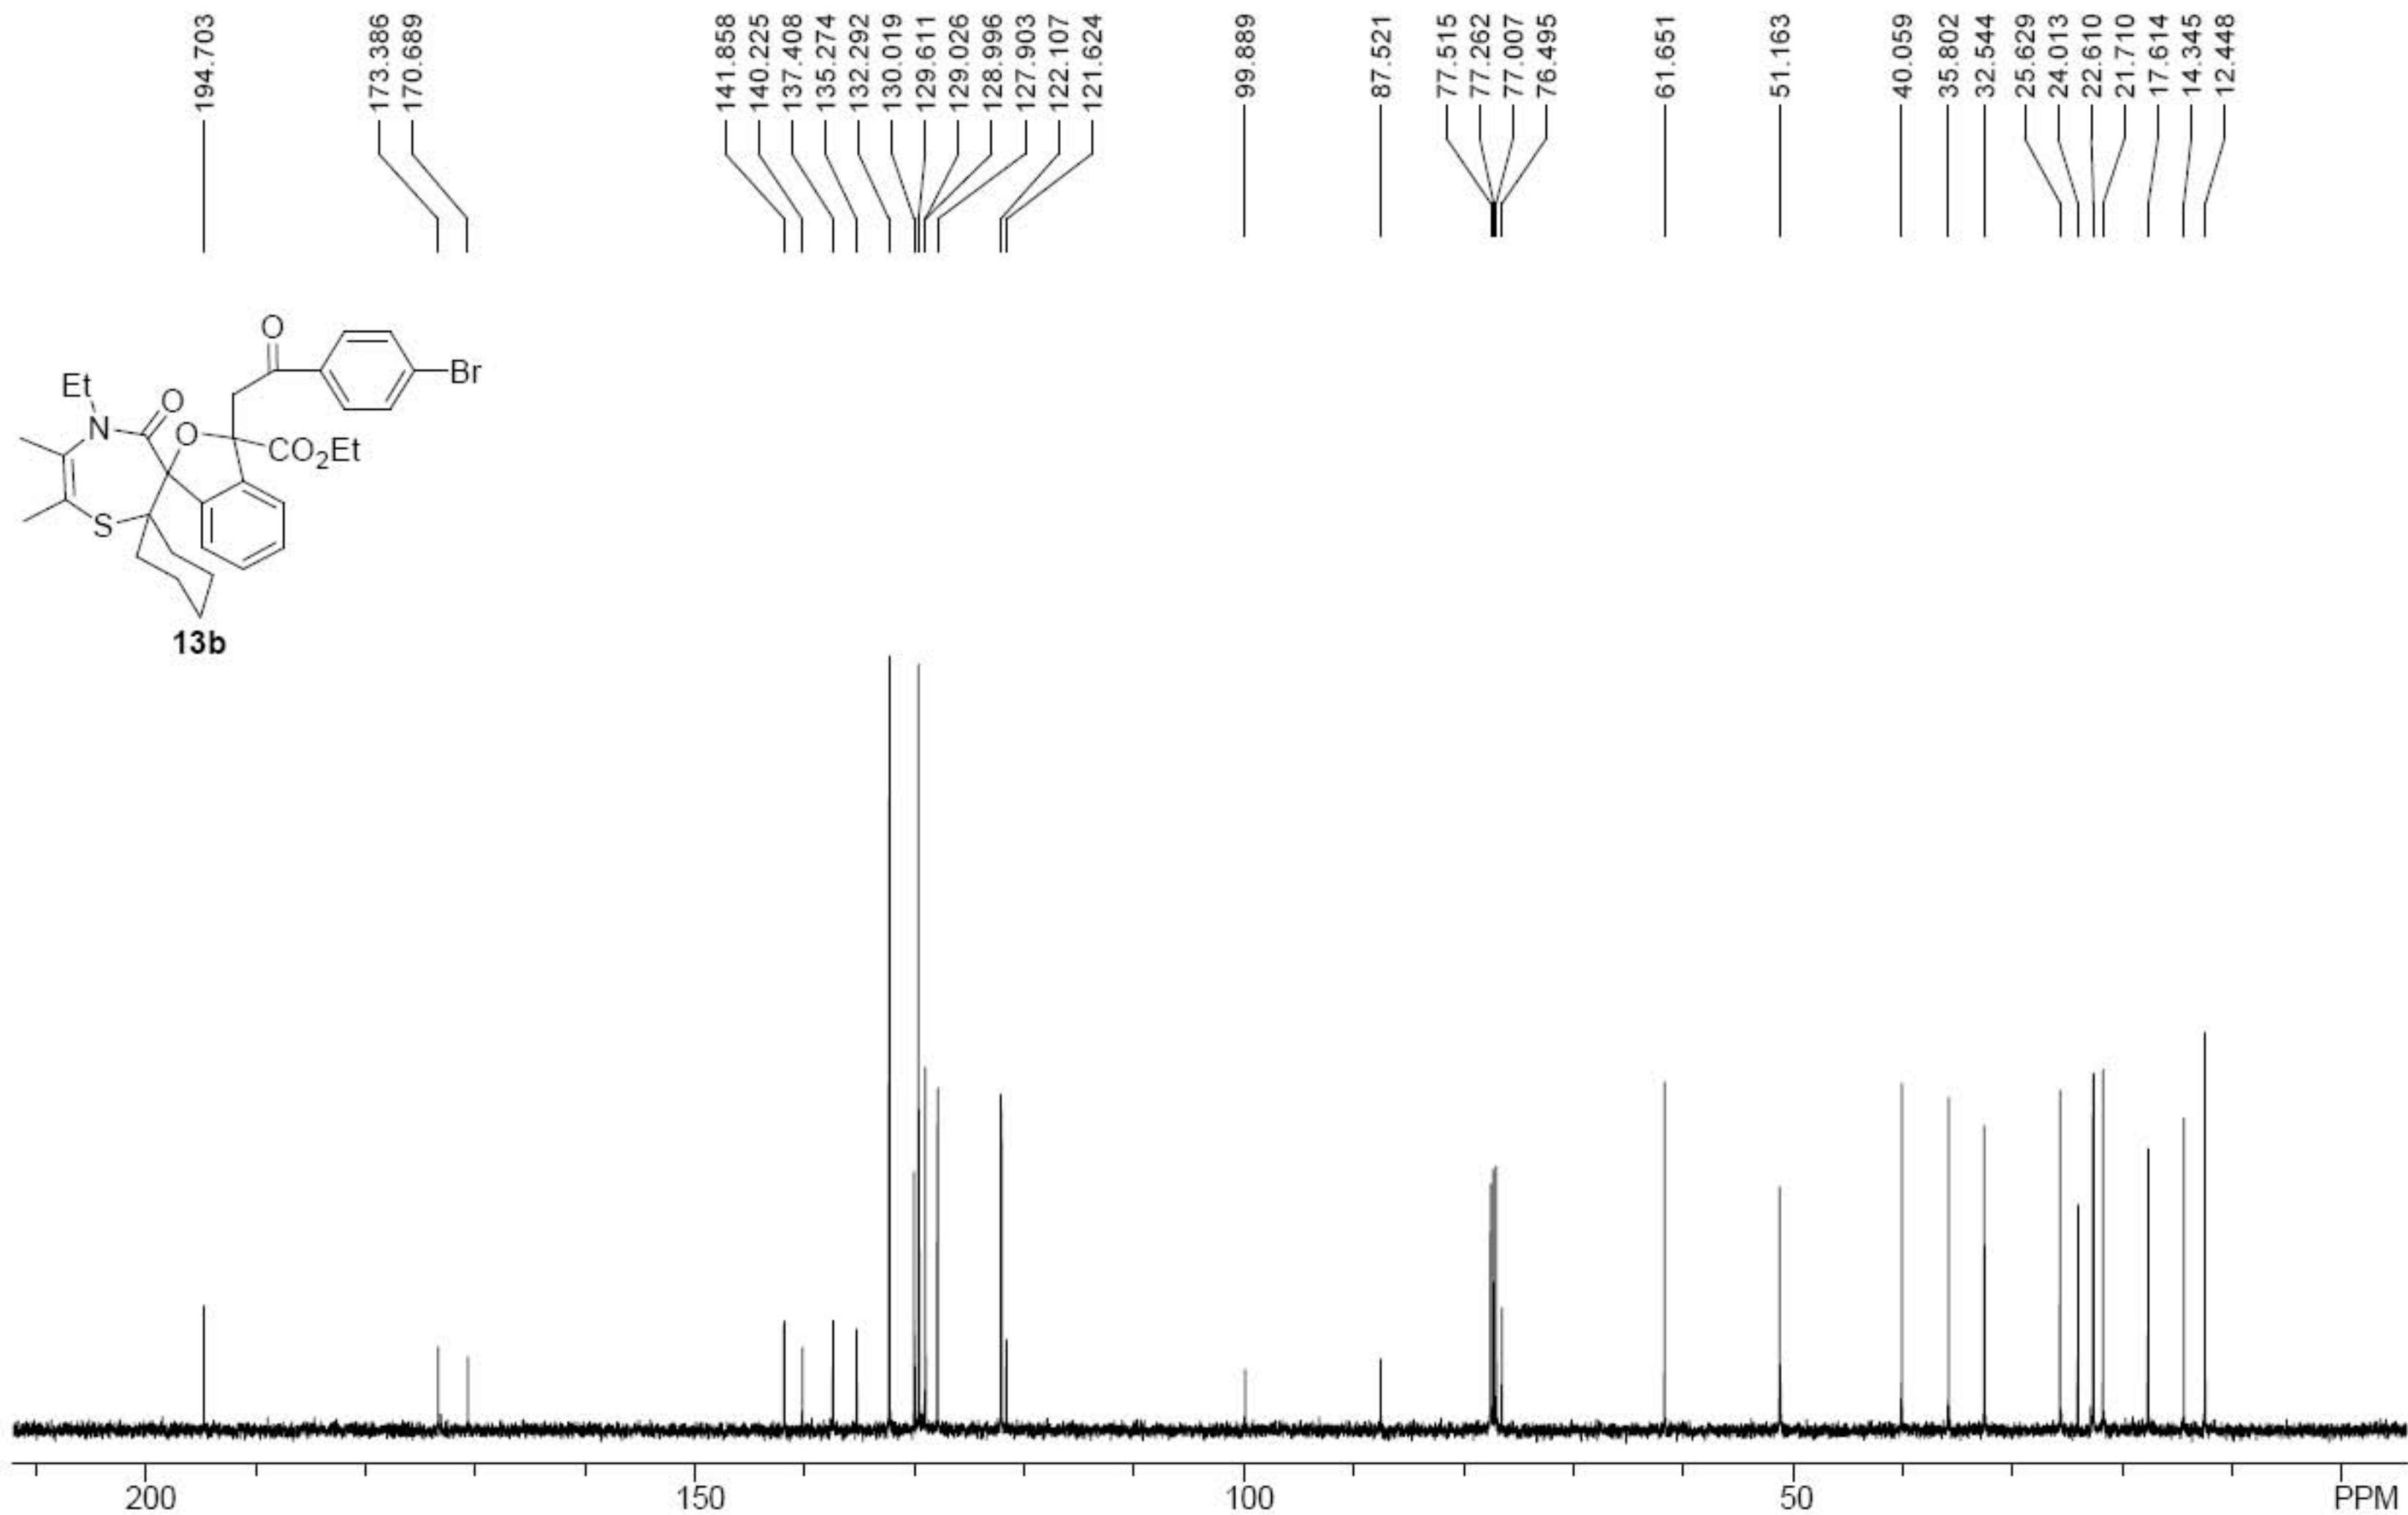



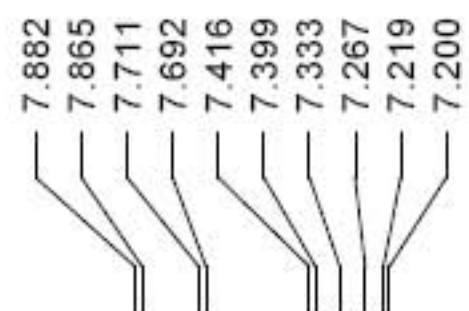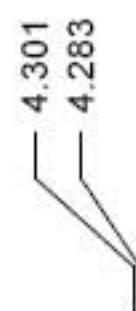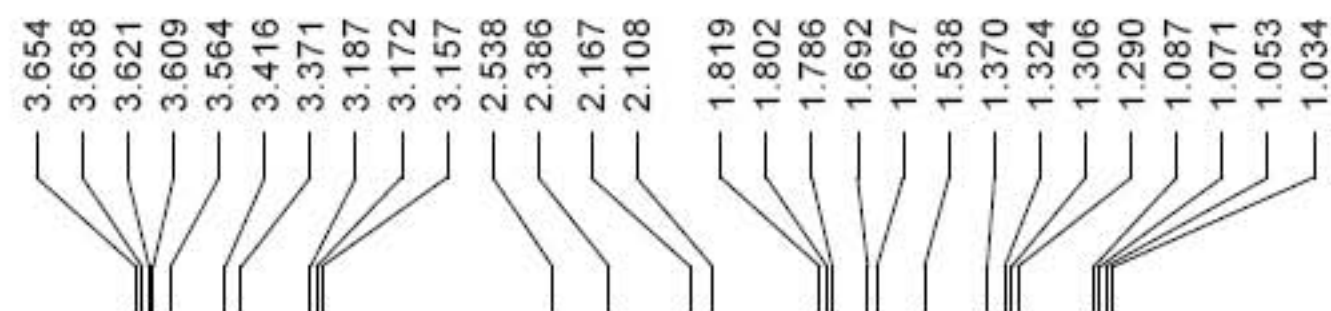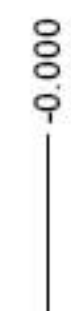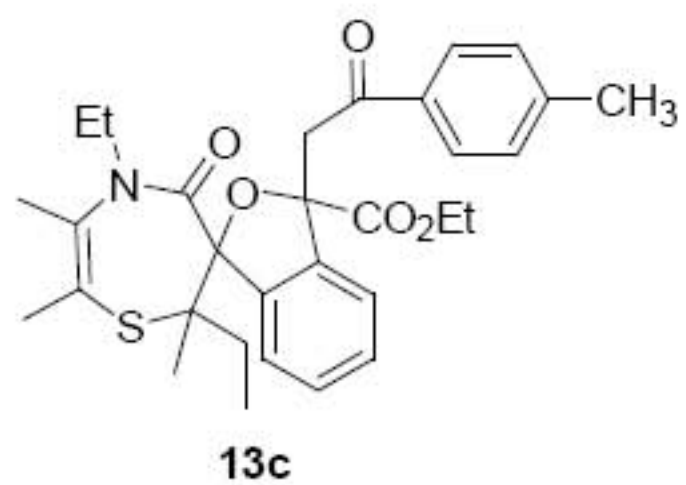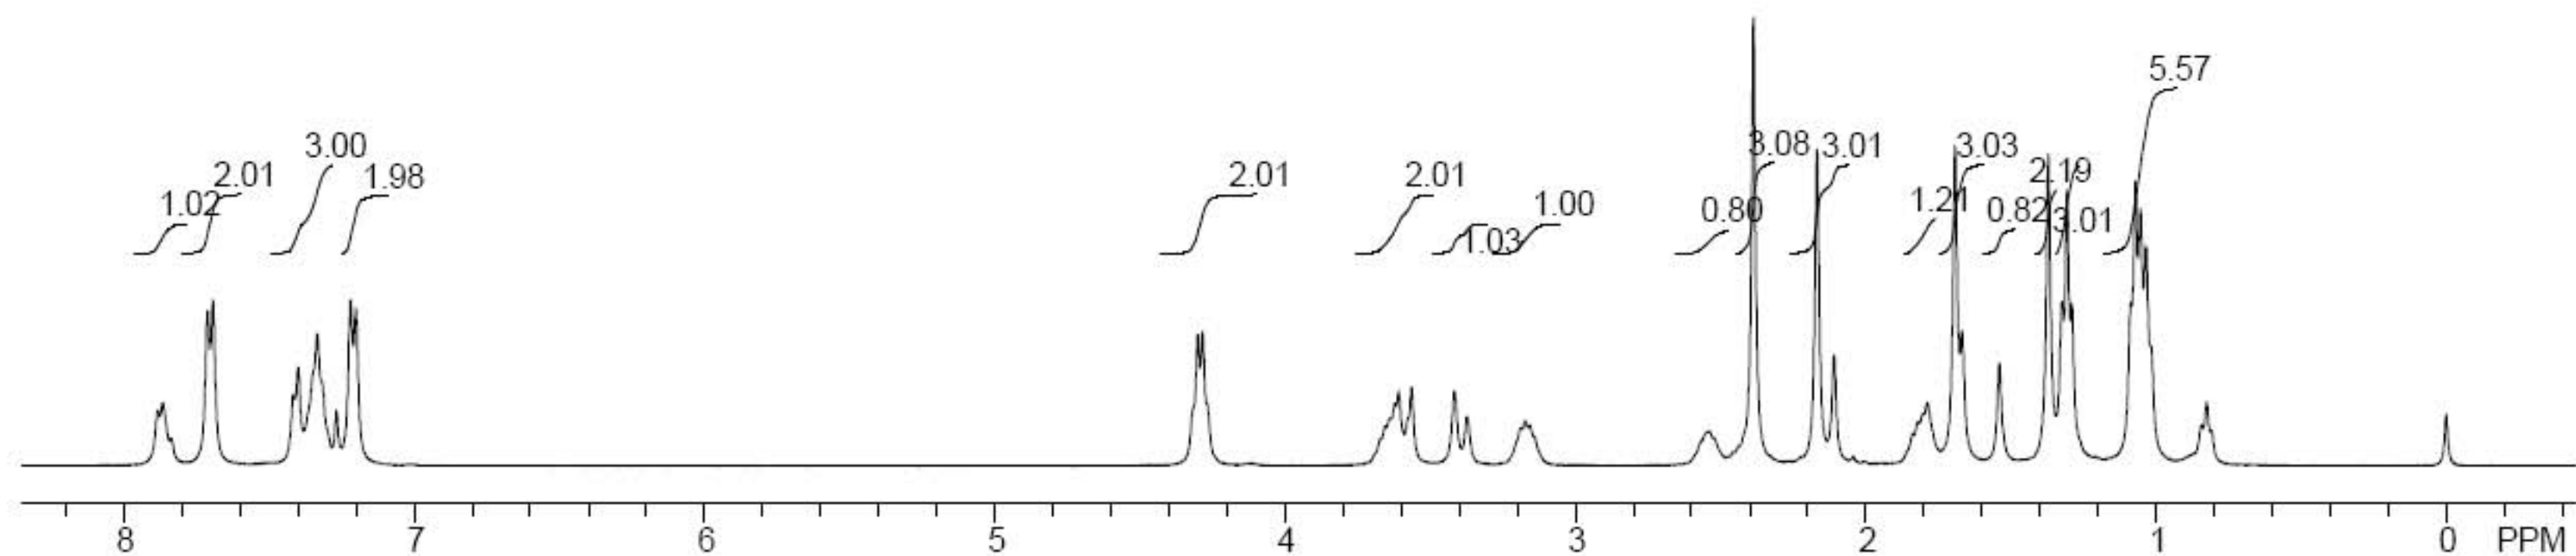

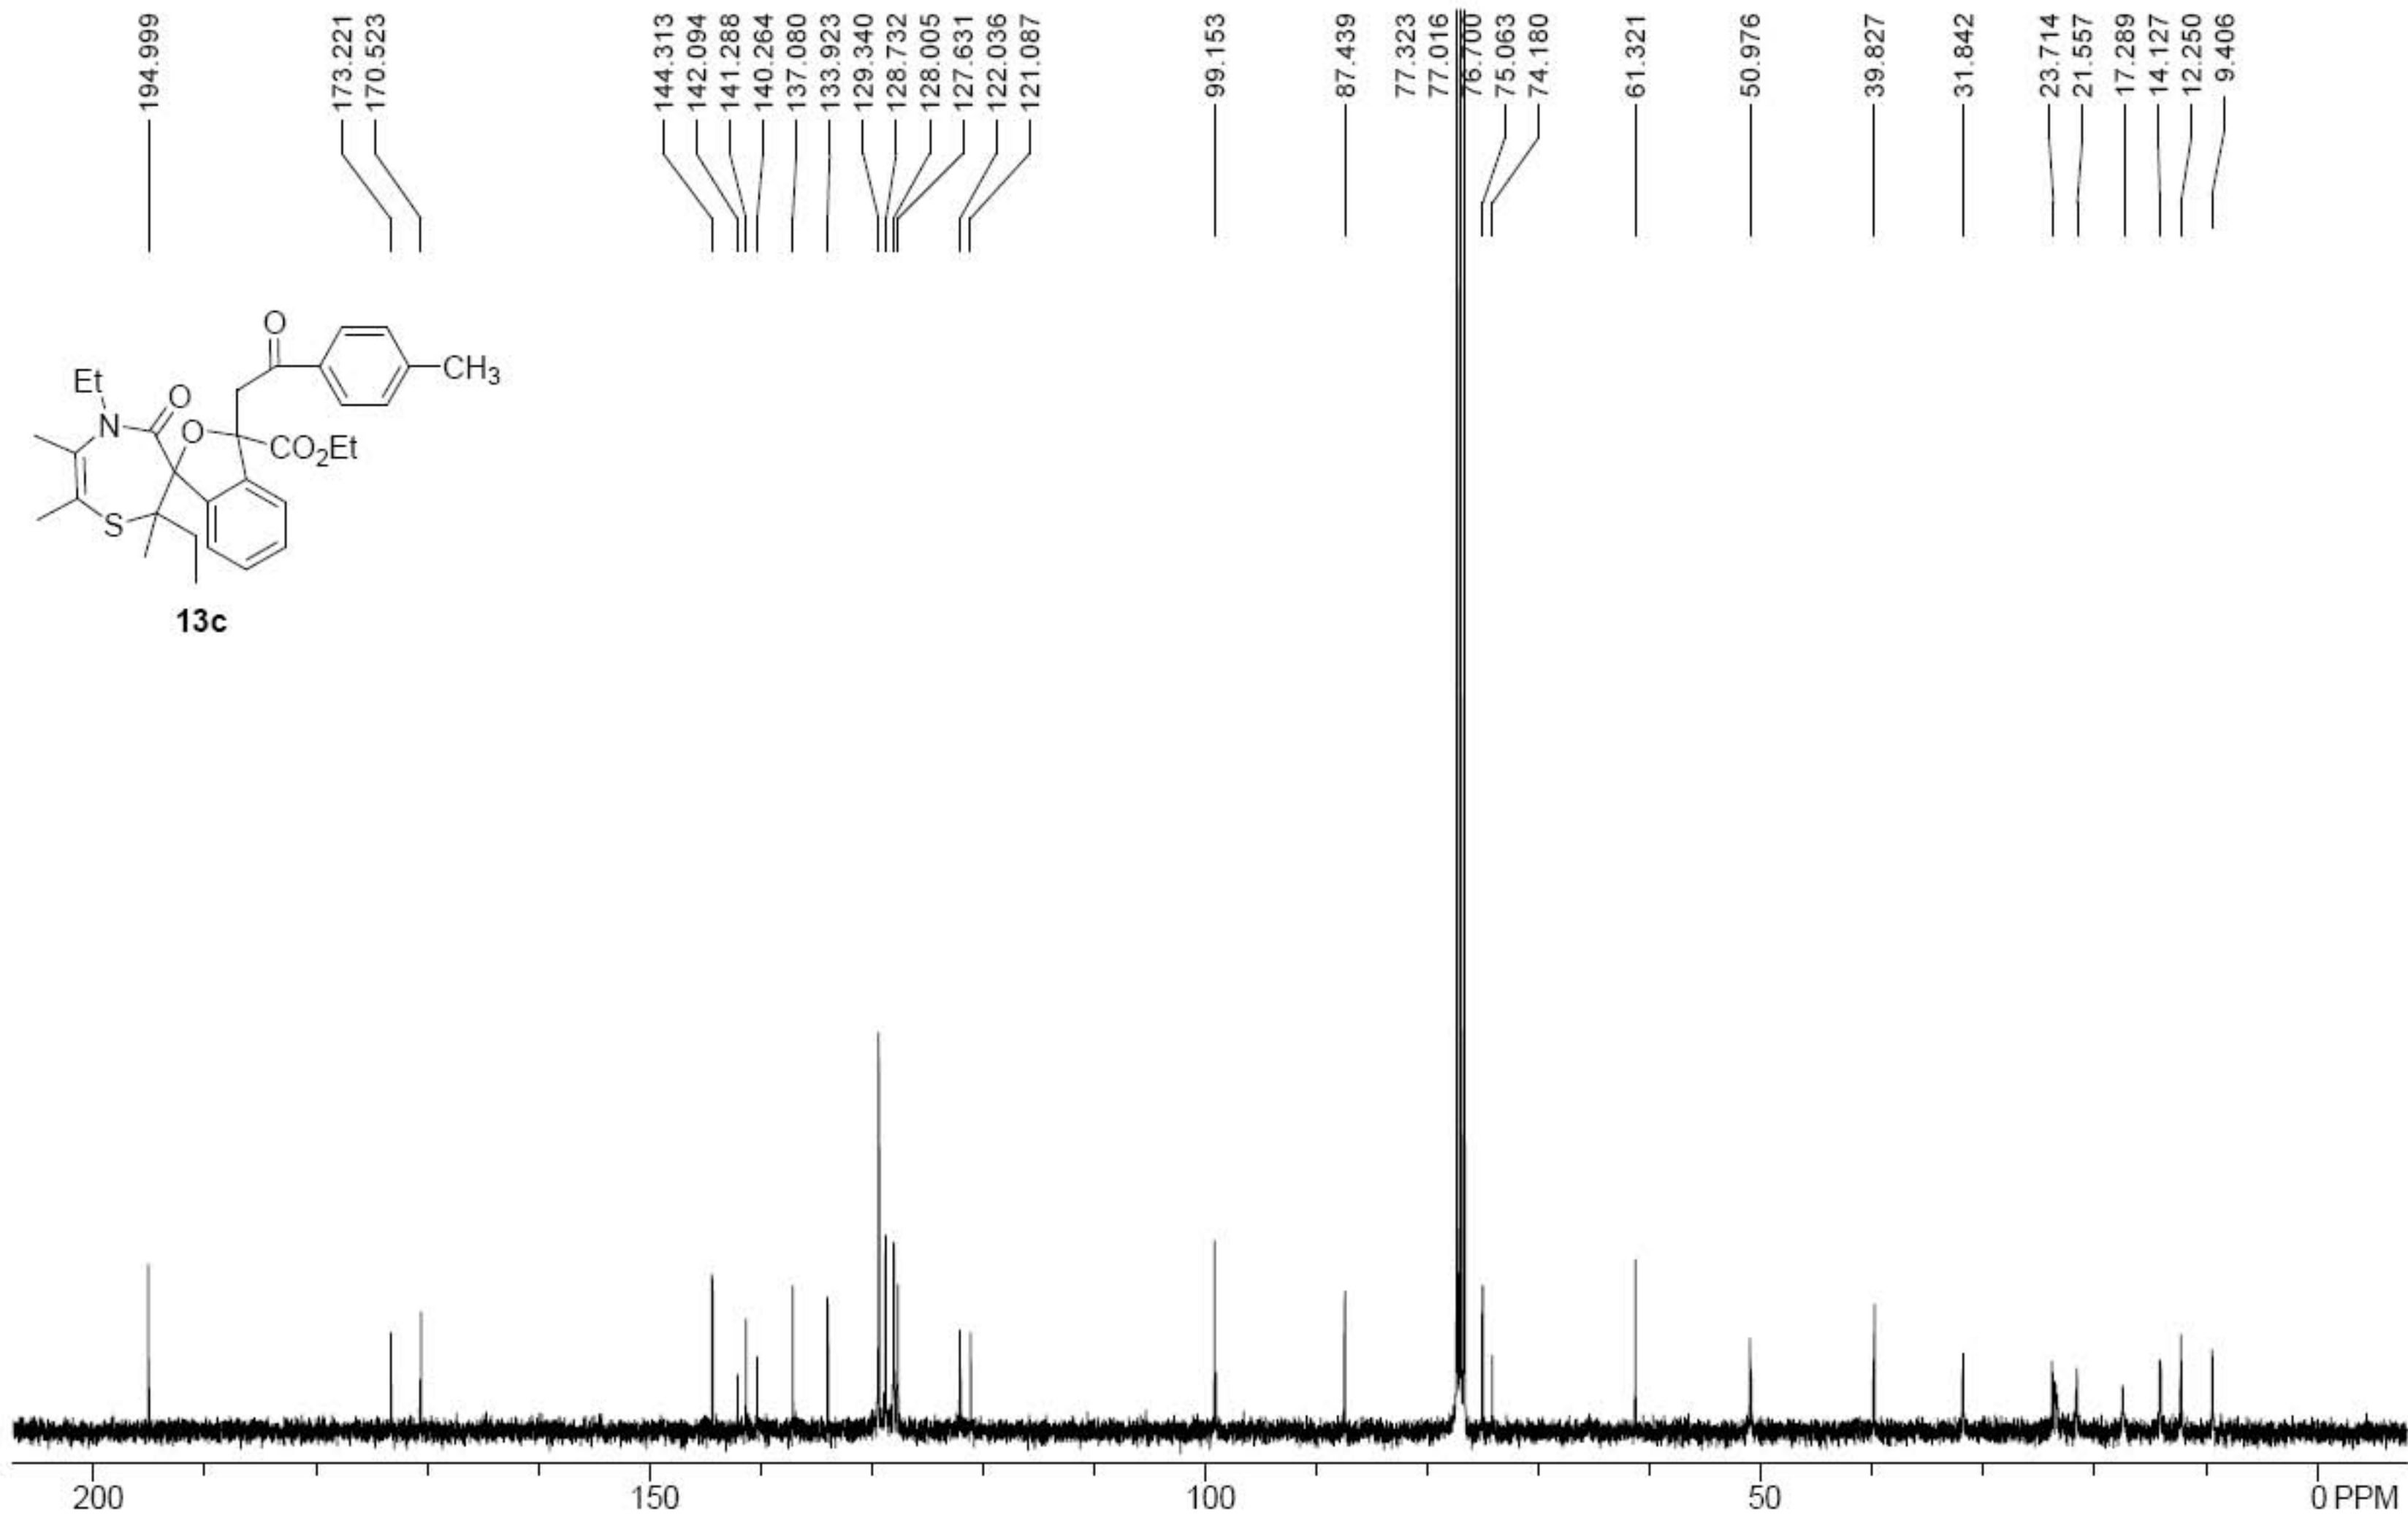

Supplement: b813371a.pdf [file b813371a.pdf]
